# Supplementary material for: A Neural Mechanism for Time-Window Separation Resolves Ambiguity of Adaptive Coding
Source: PubMed Central journal article supplement (PMC4356587; doi:10.1371/journal.pbio.1002096), 2015-03-11
Supplement: pbio.1002096.s010.pdf [file pbio.1002096.s010.pdf]

---

| Parameter   | Meaning                             | Value                 |
|-------------|-------------------------------------|-----------------------|
| $R_M$       | input resistance                    | 20 M $\Omega$         |
| $\tau_M$    | membrane time constant              | 8 ms                  |
| $E_{leak}$  | leak reversal potential             | -60 mV                |
| $V_T$       | threshold voltage                   | -50 mV                |
| $V_{reset}$ | reset voltage                       | -70 mV                |
| $\Delta_T$  | slope factor                        | 2 ms                  |
| $I_{max}$   | maximal input current               | 5.5 nA                |
| $\sigma_I$  | standard deviation of input current | 0.35 nA               |
| $m$         | slope of input nonlinearity         | 0.15 dB <sup>-1</sup> |
| $\tau_a$    | time constant of adaptation         | 40 ms                 |
| $s_{thr}$   | absolute threshold of shift         | 40 dB                 |
| $k$         | shift control constant              | 0.38                  |

---
