# Supplementary material for: A Neural Mechanism for Time-Window Separation Resolves Ambiguity of Adaptive Coding
Source: PubMed Central journal article supplement (PMC4356587; doi:10.1371/journal.pbio.1002096), 2015-03-11
Supplement: pbio.1002096.s011.pdf [file pbio.1002096.s011.pdf]

---

| Parameter                                 | Value      |
|-------------------------------------------|------------|
| $\tau_{inh}$ (IPSP decay)                 | 1.5 ms     |
| $\tau_{exc}$ (EPSP decay)                 | 4.8 ms     |
| $c_{inh}$ (IPSP amplitude constant)       | 33.0 mV·ms |
| $c_{exc}$ (EPSP amplitude constant)       | 24.9 mV·ms |
| $a$ (adaptation magnitude)                | 2 mV       |
| $\tau_{adapt}$ (adaptation time constant) | 190 ms     |

---
