# Supplementary material for: A Neural Mechanism for Time-Window Separation Resolves Ambiguity of Adaptive Coding
Source: PLoS Biol. 2015 Mar 11;13(3):e1002096. doi: 10.1371/journal.pbio.1002096 (PMC4356587; doi:10.1371/journal.pbio.1002096)
Supplement: S1 Data — (XLSX) [file pbio.1002096.s003.xlsx]

## Sheet: Figure 1C
Time (ms)	Stimulus	Spike frequency responses (Hz) to stimulus played back at 50 dB SPL - single cell example, upper two panels										Spike frequency responses (Hz) to stimulus played back at 70 dB SPL - single cell example, upper two panels											Normalized difference between responses to 50 and 70 dB SPL
		Trial 1	Trial 2	Trial 3	Trial 4	Trial 5	Trial 6	Trial 7	Trial 8	Trial 9	Trial 10	Trial 1	Trial 2	Trial 3	Trial 4	Trial 5	Trial 6	Trial 7	Trial 8	Trial 9	Trial 10		Experiment 1	Experiment 2	Experiment	Experiment 4	Experimint 5	Experiment 6
-20	0	0	0	0	0	0	0	0	0	0	0	0	0	0	0	0	0	0	0	0	0		0	0	0	0	0	0
-19.9	0	0	0	0	0	0	0	0	0	0	0	0	0	0	0	0	0	0	0	0	0		0	0	0	0	0	0
-19.8	0	0	0	0	0	0	0	0	0	0	0	0	0	0	0	0	0	0	0	0	0		0	0	0	0	0	0
-19.7	0	0	0	0	0	0	0	0	0	0	0	0	0	0	0	0	0	0	0	0	0		0	0	0	0	0	0
-19.6	0	0	0	0	0	0	0	0	0	0	0	0	0	0	0	0	0	0	0	0	0		0	0	0	0	0	0
-19.5	0	0	0	0	0	0	0	0	0	0	0	0	0	0	0	0	0	0	0	0	0		0	0	0	0	0	0
-19.4	0	0	0	0	0	0	0	0	0	0	0	0	0	0	0	0	0	0	0	0	0		0	0	0	0	0	0
-19.3	0	0	0	0	0	0	0	0	0	0	0	0	0	0	0	0	0	0	0	0	0		0	0	0	0	0	0
-19.2	0	0	0	0	0	0	0	0	0	0	0	0	0	0	0	0	0	0	0	0	0		0	0	0	0	0	0
-19.1	0	0	0	0	0	0	0	0	0	0	0	0	0	0	0	0	0	0	0	0	0		0	0	0	0	0	0
-19	0	0	0	0	0	0	0	0	0	0	0	0	0	0	0	0	0	0	0	0	0		0	0	0	0	0	0
-18.9	0	0	0	0	0	0	0	0	0	0	0	0	0	0	0	0	0	0	0	0	0		0	0	0	0	0	0
-18.8	0	0	0	0	0	0	0	0	0	0	0	0	0	0	0	0	0	0	0	0	0		0	0	0	0	0	0
-18.7	0	0	0	0	0	0	0	0	0	0	0	0	0	0	0	0	0	0	0	0	0		0	0	0	0	0	0
-18.6	0	0	0	0	0	0	0	0	0	0	0	0	0	0	0	0	0	0	0	0	0		0	0	0	0	0	0
-18.5	0	0	0	0	0	0	0	0	0	0	0	0	0	0	0	0	0	0	0	0	0		0	0	0	0	0	0
-18.4	0	0	0	0	0	0	0	0	0	0	0	0	0	0	0	0	0	0	0	0	0		0	0	0	0	0	0
-18.3	0	0	0	0	0	0	0	0	0	0	0	0	0	0	0	0	0	0	0	0	0		0	0	0	0	0	0
-18.2	0	0	0	0	0	0	0	0	0	0	0	0	0	0	0	0	0	0	0	0	0		0	0	0	0	0	0
-18.1	0	0	0	0	0	0	0	0	0	0	0	0	0	0	0	0	0	0	0	0	0		0	0	0	0	0	0
-18	0	0	0	0	0	0	0	0	0	0	0	0	0	0	0	0	0	0	0	0	0		0	0	0	0	0	0
-17.9	0	0	0	0	0	0	0	0	0	0	0	0	0	0	0	0	0	0	0	0	0		0	0	0	0	0	0
-17.8	0	0	0	0	0	0	0	0	0	0	0	0	0	0	0	0	0	0	0	0	0		0	0	0	0	0	0
-17.7	0	0	0	0	0	0	0	0	0	0	0	0	0	0	0	0	0	0	0	0	0		0	0	0	0	0	0
-17.6	0	0	0	0	0	0	0	0	0	0	0	0	0	0	0	0	0	0	0	0	0		0	0	0	0	0	0
-17.5	0	0	0	0	0	0	0	0	0	0	0	0	0	0	0	0	0	0	0	0	0		0	0	0	0	0	0
-17.4	0	0	0	0	0	0	0	0	0	0	0	0	0	0	0	0	0	0	0	0	0		0	0	0	0	0	0
-17.3	0	0	0	0	0	0	0	0	0	0	0	0	0	0	0	0	0	0	0	0	0		0	0	0	0	0	0
-17.2	0	0	0	0	0	0	0	0	0	0	0	0	0	0	0	0	0	0	0	0	0		0	0	0	0	0	0
-17.1	0	0	0	0	0	0	0	0	0	0	0	0	0	0	0	0	0	0	0	0	0		0	0	0	0	0	0
-17	0	0	0	0	0	0	0	0	0	0	0	0	0	0	0	0	0	0	0	0	0		0	0	0	0	0	0
-16.9	0	0	0	0	0	0	0	0	0	0	0	0	0	0	0	0	0	0	0	0	0		0	0	0	0	0	0
-16.8	0	0	0	0	0	0	0	0	0	0	0	0	0	0	0	0	0	0	0	0	0		0	0	0	0	0	0
-16.7	0	0	0	0	0	0	0	0	0	0	0	0	0	0	0	0	0	0	0	0	0		0	0	0	0	0	0
-16.6	0	0	0	0	0	0	0	0	0	0	0	0	0	0	0	0	0	0	0	0	0		0	0	0	0	0	0
-16.5	0	0	0	0	0	0	0	0	0	0	0	0	0	0	0	0	0	0	0	0	0		0	0	0	0	0	0
-16.4	0	0	0	0	0	0	0	0	0	0	0	0	0	0	0	0	0	0	0	0	0		0	0	0	0	0	0
-16.3	0	0	0	0	0	0	0	0	0	0	0	0	0	0	0	0	0	0	0	0	0		0	0	0	0	0	0
-16.2	0	0	0	0	0	0	0	0	0	0	0	0	0	0	0	0	0	0	0	0	0		0	0	0	0	0	0
-16.1	0	0	0	0	0	0	0	0	0	0	0	0	0	0	0	0	0	0	0	0	0		0	0	0	0	0	0
-16	0	0	0	0	0	0	0	0	0	0	0	0	0	0	0	0	0	0	0	0	0		0	0	0	0	0	0
-15.9	0	0	0	0	0	0	0	0	0	0	0	0	0	0	0	0	0	0	0	0	0		0	0	0	0	0	0
-15.8	0	0	0	0	0	0	0	0	0	0	0	0	0	0	0	0	0	0	0	0	0		0	0	0	0	0	0
-15.7	0	0	0	0	0	0	0	0	0	0	0	0	0	0	0	0	0	0	0	0	0		0	0	0	0	0	0
-15.6	0	0	0	0	0	0	0	0	0	0	0	0	0	0	0	0	0	0	0	0	0		0	0	0	0	0	0
-15.5	0	0	0	0	0	0	0	0	0	0	0	0	0	0	0	0	0	0	0	0	0		0	0	0	0	0	0
-15.4	0	0	0	0	0	0	0	0	0	0	0	0	0	0	0	0	0	0	0	0	0		0	0	0	0	0	0
-15.3	0	0	0	0	0	0	0	0	0	0	0	0	0	0	0	0	0	0	0	0	0		0	0	0	0	0	0
-15.2	0	0	0	0	0	0	0	0	0	0	0	0	0	0	0	0	0	0	0	0	0		0	0	0	0	0	0
-15.1	0	0	0	0	0	0	0	0	0	0	0	0	0	0	0	0	0	0	0	0	0		0	0	0	0	0	0
-15	0	0	0	0	0	0	0	0	0	0	0	0	0	0	0	0	0	0	0	0	0		0	0	0	0	0	0
-14.9	0	0	0	0	0	0	0	0	0	0	0	0	0	0	0	0	0	0	0	0	0		0	0	0	0	0	0
-14.8	0	0	0	0	0	0	0	0	0	0	0	0	0	0	0	0	0	0	0	0	0		0	0	0	0	0	0
-14.7	0	0	0	0	0	0	0	0	0	0	0	0	0	0	0	0	0	0	0	0	0		0	0	0	0	0	0
-14.6	0	0	0	0	0	0	0	0	0	0	0	0	0	0	0	0	0	0	0	0	0		0	0	0	0	0	0
-14.5	0	0	0	0	0	0	0	0	0	0	0	0	0	0	0	0	0	0	0	0	0		0	0	0	0	0	0
-14.4	0	0	0	0	0	0	0	0	0	0	0	0	0	0	0	0	0	0	0	0	0		0	0	0	0	0	0
-14.3	0	0	0	0	0	0	0	0	0	0	0	0	0	0	0	0	0	0	0	0	0		0	0	0	0	0	0
-14.2	0	0	0	0	0	0	0	0	0	0	0	0	0	0	0	0	0	0	0	0	0		0	0	0	0	0	0
-14.1	0	0	0	0	0	0	0	0	0	0	0	0	0	0	0	0	0	0	0	0	0		0	0	0	0	0	0
-14	0	0	0	0	0	0	0	0	0	0	0	0	0	0	0	0	0	0	0	0	0		0	0	0	0	0	0
-13.9	0	0	0	0	0	0	0	0	0	0	0	0	0	0	0	0	0	0	0	0	0		0	0	0	0	0	0
-13.8	0	0	0	0	0	0	0	0	0	0	0	0	0	0	0	0	0	0	0	0	0		0	0	0	0	0	0
-13.7	0	0	0	0	0	0	0	0	0	0	0	0	0	0	0	0	0	0	0	0	0		0	0	0	0	0	0
-13.6	0	0	0	0	0	0	0	0	0	0	0	0	0	0	0	0	0	0	0	0	0		0	0	0	0	0	0
-13.5	0	0	0	0	0	0	0	0	0	0	0	0	0	0	0	0	0	0	0	0	0		0	0	0	0	0	0
-13.4	0	0	0	0	0	0	0	0	0	0	0	0	0	0	0	0	0	0	0	0	0		0	0	0	0	0	0
-13.3	0	0	0	0	0	0	0	0	0	0	0	0	0	0	0	0	0	0	0	0	0		0	0	0	0	0	0
-13.2	0	0	0	0	0	0	0	0	0	0	0	0	0	0	0	0	0	0	0	0	0		0	0	0	0	0	0
-13.1	0	0	0	0	0	0	0	0	0	0	0	0	0	0	0	0	0	0	0	0	0		0	0	0	0	0	0
-13	0	0	0	0	0	0	0	0	0	0	0	0	0	0	0	0	0	0	0	0	0		0	0	0	0	0	0
-12.9	0	0	0	0	0	0	0	0	0	0	0	0	0	0	0	0	0	0	0	0	0		0	0	0	0	0	0
-12.8	0	0	0	0	0	0	0	0	0	0	0	0	0	0	0	0	0	0	0	0	0		0	0	0	0	0	0
-12.7	0	0	0	0	0	0	0	0	0	0	0	0	0	0	0	0	0	0	0	0	0		0	0	0	0	0	0
-12.6	0	0	0	0	0	0	0	0	0	0	0	0	0	0	0	0	0	0	0	0	0		0	0	0	0	0	0
-12.5	0	0	0	0	0	0	0	0	0	0	0	0	0	0	0	0	0	0	0	0	0		0	0	0	0	0	0
-12.4	0	0	0	0	0	0	0	0	0	0	0	0	0	0	0	0	0	0	0	0	0		0	0	0	0	0	0
-12.3	0	0	0	0	0	0	0	0	0	0	0	0	0	0	0	0	0	0	0	0	0		0	0	0	0	0	0
-12.2	0	0	0	0	0	0	0	0	0	0	0	0	0	0	0	0	0	0	0	0	0		0	0	0	0	0	0
-12.1	0	0	0	0	0	0	0	0	0	0	0	0	0	0	0	0	0	0	0	0	0		0	0	0	0	0	0
-12	0	0	0	0	0	0	0	0	0	0	0	0	0	0	0	0	0	0	0	0	0		0	0	0	0	0	0
-11.9	0	0	0	0	0	0	0	0	0	0	0	0	0	0	0	0	0	0	0	0	0		0	0	0	0	0	0
-11.8	0	0	0	0	0	0	0	0	0	0	0	0	0	0	0	0	0	0	0	0	0		0	0	0	0	0	0
-11.7	0	0	0	0	0	0	0	0	0	0	0	0	0	0	0	0	0	0	0	0	0		0	0	0	0	0	0
-11.6	0	0	0	0	0	0	0	0	0	0	0	0	0	0	0	0	0	0	0	0	0		0	0	0	0	0	0
-11.5	0	0	0	0	0	0	0	0	0	0	0	0	0	0	0	0	0	0	0	0	0		0	0	0	0	0	0
-11.4	0	0	0	0	0	0	0	0	0	0	0	0	0	0	0	0	0	0	0	0	0		0	0	0	0	0	0
-11.3	0	0	0	0	0	0	0	0	0	0	0	0	0	0	0	0	0	0	0	0	0		0	0	0	0	0	0
-11.2	0	0	0	0	0	0	0	0	0	0	0	0	0	0	0	0	0	0	0	0	0		0	0	0	0	0	0
-11.1	0	0	0	0	0	0	0	0	0	0	0	0	0	0	0	0	0	0	0	0	0		0	0	0	0	0	0
-11	0	0	0	0	0	0	0	0	0	0	0	0	0	0	0	0	0	0	0	0	0		0	0	0	0	0	0
-10.9	0	0	0	0	0	0	0	0	0	0	0	0	0	0	0	0	0	0	0	0	0		0	0	0	0	0	0
-10.8	0	0	0	0	0	0	0	0	0	0	0	0	0	0	0	0	0	0	0	0	0		0	0	0	0	0	0
-10.7	0	0	0	0	0	0	0	0	0	0	0	0	0	0	0	0	0	0	0	0	0		0	0	0	0	0	0
-10.6	0	0	0	0	0	0	0	0	0	0	0	0	0	0	0	0	0	0	0	0	0		0	0	0	0	0	0
-10.5	0	0	0	0	0	0	0	0	0	0	0	0	0	0	0	0	0	0	0	0	0		0	0	0	0	0	0
-10.4	0	0	0	0	0	0	0	0	0	0	0	0	0	0	0	0	0	0	0	0	0		0	0	0	0	0	0
-10.3	0	0	0	0	0	0	0	0	0	0	0	0	0	0	0	0	0	0	0	0	0		0	0	0	0	0	0
-10.2	0	0	0	0	0	0	0	0	0	0	0	0	0	0	0	0	0	0	0	0	0		0	0	0	0	0	0
-10.1	0	0	0	0	0	0	0	0	0	0	0	0	0	0	0	0	0	0	0	0	0		0	0	0	0	0	0
-10	0	0	0	0	0	0	0	0	0	0	0	0	0	0	0	0	0	0	0	0	0		0	0	0	0	0	0
-9.9	0	0	0	0	0	0	0	0	0	0	0	0	0	0	0	0	0	0	0	0	0		0	0	0	0	0	0
-9.8	0	0	0	0	0	0	0	0	0	0	0	0	0	0	0	0	0	0	0	0	0		0	0	0	0	0	0
-9.7	0	0	0	0	0	0	0	0	0	0	0	0	0	0	0	0	0	0	0	0	0		0	0	0	0	0	0
-9.6	0	0	0	0	0	0	0	0	0	0	0	0	0	0	0	0	0	0	0	0	0		0	0	0	0	0	0
-9.5	0	0	0	0	0	0	0	0	0	0	0	0	0	0	0	0	0	0	0	0	0		0	0	0	0	0	0
-9.4	0	0	0	0	0	0	0	0	0	0	0	0	0	0	0	0	0	0	0	0	0		0	0	0	0	0	0
-9.3	0	0	0	0	0	0	0	0	0	0	0	0	0	0	0	0	0	0	0	0	0		0	0	0	0	0	0
-9.2	0	0	0	0	0	0	0	0	0	0	0	0	0	0	0	0	0	0	0	0	0		0	0	0	0	0	0
-9.1	0	0	0	0	0	0	0	0	0	0	0	0	0	0	0	0	0	0	0	0	0		0	0	0	0	0	0
-9	0	0	0	0	0	0	0	0	0	0	0	0	0	0	0	0	0	0	0	0	0		0	0	0	0	0	0
-8.9	0	0	0	0	0	0	0	0	0	0	0	0	0	0	0	0	0	0	0	0	0		0	0	0	0	0	0
-8.8	0	0	0	0	0	0	0	0	0	0	0	0	0	0	0	0	0	0	0	0	0		0	0	0	0	0	0
-8.7	0	0	0	0	0	0	0	0	0	0	0	0	0	0	0	0	0	0	0	0	0		0	0	0	0	0	0
-8.6	0	0	0	0	0	0	0	0	0	0	0	0	0	0	0	0	0	0	0	0	0		0	0	0	0	0	0
-8.5	0	0	0	0	0	0	0	0	0	0	0	0	0	0	0	0	0	0	0	0	0		0	0	0	0	0	0
-8.4	0	0	0	0	0	0	0	0	0	0	0	0	0	0	0	0	0	0	0	0	0		0	0	0	0	0	0
-8.3	0	0	0	0	0	0	0	0	0	0	0	0	0	0	0	0	0	0	0	0	0		0	0	0	0	0	0
-8.2	0	0	0	0	0	0	0	0	0	0	0	0	0	0	0	0	0	0	0	0	0		0	0	0	0	0	0
-8.1	0	0	0	0	0	0	0	0	0	0	0	0	0	0	0	0	0	0	0	0	0		0	0	0	0	0	0
-8	0	0	0	0	0	0	0	0	0	0	0	0	0	0	0	0	0	0	0	0	0		0	0	0	0	0	0
-7.9	0	0	0	0	0	0	0	0	0	0	0	0	0	0	0	0	0	0	0	0	0		0	0	0	0	0	0
-7.8	0	0	0	0	0	0	0	0	0	0	0	0	0	0	0	0	0	0	0	0	0		0	0	0	0	0	0
-7.7	0	0	0	0	0	0	0	0	0	0	0	0	0	0	0	0	0	0	0	0	0		0	0	0	0	0	0
-7.6	0	0	0	0	0	0	0	0	0	0	0	0	0	0	0	0	0	0	0	0	0		0	0	0	0	0	0
-7.5	0	0	0	0	0	0	0	0	0	0	0	0	0	0	0	0	0	0	0	0	0		0	0	0	0	0	0
-7.4	0	0	0	0	0	0	0	0	0	0	0	0	0	0	0	0	0	0	0	0	0		0	0	0	0	0	0
-7.3	0	0	0	0	0	0	0	0	0	0	0	0	0	0	0	0	0	0	0	0	0		0	0	0	0	0	0
-7.2	0	0	0	0	0	0	0	0	0	0	0	0	0	0	0	0	0	0	0	0	0		0	0	0	0	0	0
-7.1	0	0	0	0	0	0	0	0	0	0	0	0	0	0	0	0	0	0	0	0	0		0	0	0	0	0	0
-7	0	0	0	0	0	0	0	0	0	0	0	0	0	0	0	0	0	0	0	0	0		0	0	0	0	0	0
-6.9	0	0	0	0	0	0	0	0	0	0	0	0	0	0	0	0	0	0	0	0	0		0	0	0	0	0	0
-6.8	0	0	0	0	0	0	0	0	0	0	0	0	0	0	0	0	0	0	0	0	0		0	0	0	0	0	0
-6.7	0	0	0	0	0	0	0	0	0	0	0	0	0	0	0	0	0	0	0	0	0		0	0	0	0	0	0
-6.6	0	0	0	0	0	0	0	0	0	0	0	0	0	0	0	0	0	0	0	0	0		0	0	0	0	0	0
-6.5	0	0	0	0	0	0	0	0	0	0	0	0	0	0	0	0	0	0	0	0	0		0	0	0	0	0	0
-6.4	0	0	0	0	0	0	0	0	0	0	0	0	0	0	0	0	0	0	0	0	0		0	0	0	0	0	0
-6.3	0	0	0	0	0	0	0	0	0	0	0	0	0	0	0	0	0	0	0	0	0		0	0	0	0	0	0
-6.2	0	0	0	0	0	0	0	0	0	0	0	0	0	0	0	0	0	0	0	0	0		0	0	0	0	0	0
-6.1	0	0	0	0	0	0	0	0	0	0	0	0	0	0	0	0	0	0	0	0	0		0	0	0	0	0	0
-6	0	0	0	0	0	0	0	0	0	0	0	0	0	0	0	0	0	0	0	0	0		0	0	0	0	0	0
-5.9	0	0	0	0	0	0	0	0	0	0	0	0	0	0	0	0	0	0	0	0	0		0	0	0	0	0	0
-5.8	0	0	0	0	0	0	0	0	0	0	0	0	0	0	0	0	0	0	0	0	0		0	0	0	0	0	0
-5.7	0	0	0	0	0	0	0	0	0	0	0	0	0	0	0	0	0	0	0	0	0		0	0	0	0	0	0
-5.6	0	0	0	0	0	0	0	0	0	0	0	0	0	0	0	0	0	0	0	0	0		0	0	0	0	0	0
-5.5	0	0	0	0	0	0	0	0	0	0	0	0	0	0	0	0	0	0	0	0	0		0	0	0	0	0	0
-5.4	0	0	0	0	0	0	0	0	0	0	0	0	0	0	0	0	0	0	0	0	0		0	0	0	0	0	0
-5.3	0	0	0	0	0	0	0	0	0	0	0	0	0	0	0	0	0	0	0	0	0		0	0	0	0	0	0
-5.2	0	0	0	0	0	0	0	0	0	0	0	0	0	0	0	0	0	0	0	0	0		0	0	0	0	0	0
-5.1	0	0	0	0	0	0	0	0	0	0	0	0	0	0	0	0	0	0	0	0	0		0	0	0	0	0	0
-5	0	0	0	0	0	0	0	0	0	0	0	0	0	0	0	0	0	0	0	0	0		0	0	0	0	0	0
-4.9	0	0	0	0	0	0	0	0	0	0	0	0	0	0	0	0	0	0	0	0	0		0	0	0	0	0	0
-4.8	0	0	0	0	0	0	0	0	0	0	0	0	0	0	0	0	0	0	0	0	0		0	0	0	0	0	0
-4.7	0	0	0	0	0	0	0	0	0	0	0	0	0	0	0	0	0	0	0	0	0		0	0	0	0	0	0
-4.6	0	0	0	0	0	0	0	0	0	0	0	0	0	0	0	0	0	0	0	0	0		0	0	0	0	0	0
-4.5	0	0	0	0	0	0	0	0	0	0	0	0	0	0	0	0	0	0	0	0	0		0	0	0	0	0	0
-4.4	0	0	0	0	0	0	0	0	0	0	0	0	0	0	0	0	0	0	0	0	0		0	0	0	0	0	0
-4.3	0	0	0	0	0	0	0	0	0	0	0	0	0	0	0	0	0	0	0	0	0		0	0	0	0	0	0
-4.2	0	0	0	0	0	0	0	0	0	0	0	0	0	0	0	0	0	0	0	0	0		0	0	0	0	0	0
-4.1	0	0	0	0	0	0	0	0	0	0	0	0	0	0	0	0	0	0	0	0	0		0	0	0	0	0	0
-4	0	0	0	0	0	0	0	0	0	0	0	0	0	0	0	0	0	0	0	0	0		0	0	0	0	0	0
-3.9	0	0	0	0	0	0	0	0	0	0	0	0	0	0	0	0	0	0	0	0	0		0	0	0	0	0	0
-3.8	0	0	0	0	0	0	0	0	0	0	0	0	0	0	0	0	0	0	0	0	0		0	0	0	0	0	0
-3.7	0	0	0	0	0	0	0	0	0	0	0	0	0	0	0	0	0	0	0	0	0		0	0	0	0	0	0
-3.6	0	0	0	0	0	0	0	0	0	0	0	0	0	0	0	0	0	0	0	0	0		0	0	0	0	0	0
-3.5	0	0	0	0	0	0	0	0	0	0	0	0	0	0	0	0	0	0	0	0	0		0	0	0	0	0	0
-3.4	0	0	0	0	0	0	0	0	0	0	0	0	0	0	0	0	0	0	0	0	0		0	0	0	0	0	0
-3.3	0	0	0	0	0	0	0	0	0	0	0	0	0	0	0	0	0	0	0	0	0		0	0	0	0	0	0
-3.2	0	0	0	0	0	0	0	0	0	0	0	0	0	0	0	0	0	0	0	0	0		0	0	0	0	0	0
-3.1	0	0	0	0	0	0	0	0	0	0	0	0	0	0	0	0	0	0	0	0	0		0	0	0	0	0	0
-3	0	0	0	0	0	0	0	0	0	0	0	0	0	0	0	0	0	0	0	0	0		0	0	0	0	0	0
-2.9	0	0	0	0	0	0	0	0	0	0	0	0	0	0	0	0	0	0	0	0	0		0	0	0	0	0	0
-2.8	0	0	0	0	0	0	0	0	0	0	0	0	0	0	0	0	0	0	0	0	0		0	0	0	0	0	0
-2.7	0	0	0	0	0	0	0	0	0	0	0	0	0	0	0	0	0	0	0	0	0		0	0	0	0	0	0
-2.6	0	0	0	0	0	0	0	0	0	0	0	0	0	0	0	0	0	0	0	0	0		0	0	0	0	0	0
-2.5	0	0	0	0	0	0	0	0	0	0	0	0	0	0	0	0	0	0	0	0	0		0	0	0	0	0	0
-2.4	0	0	0	0	0	0	0	0	0	0	0	0	0	0	0	0	0	0	0	0	0		0	0	0	0	0	0
-2.3	0	0	0	0	0	0	0	0	0	0	0	0	0	0	0	0	0	0	0	0	0		0	0	0	0	0	0
-2.2	0	0	0	0	0	0	0	0	0	0	0	0	0	0	0	0	0	0	0	0	0		0	0	0	0	0	0
-2.1	0	0	0	0	0	0	0	0	0	0	0	0	0	0	0	0	0	0	0	0	0		0	0	0	0	0	0
-2	0	0	0	0	0	0	0	0	0	0	0	0	0	0	0	0	0	0	0	0	0		0	0	0	0	0	0
-1.9	0	0	0	0	0	0	0	0	0	0	0	0	0	0	0	0	0	0	0	0	0		0	0	0	0	0	0
-1.8	0	0	0	0	0	0	0	0	0	0	0	0	0	0	0	0	0	0	0	0	0		0	0	0	0	0	0
-1.7	0	0	0	0	0	0	0	0	0	0	0	0	0	0	0	0	0	0	0	0	0		0	0	0	0	0	0
-1.6	0	0	0	0	0	0	0	0	0	0	0	0	0	0	0	0	0	0	0	0	0		0	0	0	0	0	0
-1.5	0	0	0	0	0	0	0	0	0	0	0	0	0	0	0	0	0	0	0	0	0		0	0	0	0	0	0
-1.4	0	0	0	0	0	0	0	0	0	0	0	0	0	0	0	0	0	0	0	0	0		0	0	0	0	0	0
-1.3	0	0	0	0	0	0	0	0	0	0	0	0	0	0	0	0	0	0	0	0	0		0	0	0	0	0	0
-1.2	0	0	0	0	0	0	0	0	0	0	0	0	0	0	0	0	0	0	0	0	0		0	0	0	0	0	0
-1.1	0	0	0	0	0	0	0	0	0	0	0	0	0	0	0	0	0	0	0	0	0		0	0	0	0	0	0
-1	0	0	0	0	0	0	0	0	0	0	0	0	0	0	0	0	0	0	0	0	0		0	0	0	0	0	0
-0.9	0	0	0	0	0	0	0	0	0	0	0	2.41425	0	0	0	0	0	0	0	0	0		1	1	1	1	1	1
-0.8	0	0.7508	0	0	0	0	0	0	0	0	0	5.14936	0	0	0	0	0	0	0	0	0		0.745498	1	0.745498	0.745498	1	0.745498
-0.7	0	1.60253	0	0	0	0	0	0	0	0	0	8.83768	0	0	0	0	0	0	0	0	0		0.693008	1	0.693008	0.693008	1	0.693008
-0.6	0	2.75234	0	0	0	0	0	0	0	0	0	14.065	0	0	0	0	0	0	0	0	0		0.672679	1	0.672679	0.672679	1	0.672679
-0.5	0	4.38343	0	0	0	0	0	0	0	0	0	21.3434	0	0	0	0	0	0	0	0	0		0.659233	1	0.659233	0.659233	1	0.659233
-0.4	0	6.6565	0	0	0	0	0	0	0	0	0	31.0872	0	0	0	0	0	0	0	0	0		0.647279	1	0.647279	0.647279	1	0.647279
-0.3	0	9.70223	0	0	0	0	0	0	0	0	0	43.5939	0	0	0	0	0	0	0	0	0		0.635912	1	0.635912	0.635912	1	0.635912
-0.2	0	13.6152	0	0	0	0	0	0	0	0	0	59.0304	0	0	0	0	0	0	0	0	0		0.625162	1	0.625162	0.625162	1	0.625162
-0.1	0	18.4494	0	1.17834	0.39278	0	0	0	0	0	0	77.4256	1.83939	0	2.2844	0	0	0	0	0	0		0.605779	0.962197	0.615886	0.631008	0.971513	0.605779
0	0	24.2157	0.975178	2.51509	0.838362	0	0	0	0	0	0	98.6689	3.92328	1.1697	4.87246	0	0	0	0	0	0		0.595177	0.94011	0.595258	0.620206	0.937743	0.583837
0.1	2.30259	30.8815	2.08145	4.31964	1.43988	0.446529	0.520494	0.343484	0	0	0	122.516	6.73347	2.49488	8.36254	0	0	0	0	0	0		0.581391	0.910682	0.576253	0.604411	0.908144	0.555534
0.2	2.30259	38.3721	3.57488	6.87954	2.29318	0.953085	1.11096	0.733142	0	0	0	148.599	10.7163	4.28193	13.309	0	0	0	0	0	0		0.569681	0.884335	0.559708	0.593686	0.881043	0.53283
0.3	2.30259	46.5742	5.69342	10.447	3.48233	1.63692	1.90806	1.25917	0	0	0	176.447	16.262	6.8147	20.1963	0	1.53516	0	0	0	0		0.561458	0.857741	0.543413	0.584601	0.853242	0.514118
0.4	2.30258	55.3413	8.64579	15.2271	5.0757	2.60699	3.03882	2.00537	0	0.695413	0	205.506	23.6862	10.3413	29.4167	0	3.27441	0	0	0	0		0.550381	0.82611	0.526623	0.575722	0.820159	0.492209
0.5	2.30258	64.5003	12.6017	21.3683	7.12276	3.95886	4.61463	3.04528	0	1.48431	0	235.162	33.2157	15.0625	41.2518	0	5.61985	0.881486	0	0	0		0.540827	0.795508	0.510447	0.567499	0.788506	0.472332
0.6	2.30258	73.86	17.6841	28.9553	9.65175	5.77027	6.72609	4.43867	0	2.5493	0.792901	264.778	44.9778	21.1225	55.8596	0	8.94404	1.88016	0	0	0		0.53226	0.765511	0.490855	0.5561	0.754332	0.450982
0.7	2.30259	83.2197	23.963	38.0052	12.6684	8.09745	9.43875	6.22881	0	4.06006	1.69239	293.714	58.9945	28.6023	73.2674	2.13396	13.5726	3.22691	1.14505	0	0		0.524421	0.736806	0.472944	0.545904	0.722978	0.433943
0.8	2.30259	92.3787	31.4526	48.4668	16.1556	10.9725	12.7901	8.4404	0	6.16544	2.90668	321.365	75.1816	37.5159	93.3707	4.55162	19.7691	5.13567	2.44233	0	0		0.51718	0.709066	0.455103	0.53549	0.692912	0.417716
0.9	2.30259	101.146	40.1105	60.2229	20.0743	14.402	16.7876	11.0784	0	8.98649	4.62923	347.185	93.3528	47.8097	115.938	7.81196	27.7229	7.79342	4.19179	0	0		0.510464	0.682639	0.437582	0.524973	0.664319	0.402875
1	2.3026	109.348	49.8397	73.0957	24.3652	18.3664	21.4087	14.128	0	12.6108	7.02976	370.711	113.229	59.3652	140.623	12.4329	37.5401	11.3515	6.67129	0	0		0.504227	0.657772	0.420636	0.5145	0.637434	0.389729
1.1	2.30262	116.838	60.493	86.8551	28.9517	22.8213	26.6015	17.5549	0.463609	17.0883	10.2463	391.59	134.45	72.0048	166.978	18.867	49.2391	15.9186	10.1238	0	0		0.497795	0.633811	0.403664	0.503485	0.611689	0.377886
1.2	2.30265	123.504	71.88	101.23	33.7432	27.6994	32.2877	21.3072	0.989542	22.4293	14.3787	409.59	156.593	85.4999	194.479	27.4808	62.7498	21.5557	14.7458	0	0		0.491845	0.611725	0.387754	0.492856	0.588058	0.367927
1.3	2.30268	129.271	83.7762	115.919	38.6397	32.9135	38.3654	25.3181	1.69953	28.6034	19.4839	424.614	179.193	99.5815	222.546	38.5374	77.9167	28.2735	20.6786	0	0		0.4862	0.591339	0.372861	0.482545	0.566406	0.359647
1.4	2.30273	134.105	95.9331	130.609	43.5362	38.3607	44.7149	29.5082	2.70671	35.5414	25.5736	436.704	201.762	113.954	250.575	52.1845	94.5065	36.0315	28.0014	0	0		0.480749	0.57253	0.35898	0.472534	0.546629	0.352855
1.5	2.30279	138.018	108.09	144.983	48.3277	43.9273	51.2035	33.7902	4.1103	43.1384	32.6132	446.035	223.814	128.306	277.962	68.4477	112.219	44.7406	36.728	0	0		0.475423	0.555206	0.346125	0.462833	0.52864	0.347378
1.6	2.30286	141.063	119.986	158.743	52.9142	49.4938	57.6922	38.0722	5.991	51.2587	40.5238	452.911	244.887	142.329	304.134	87.2295	130.702	54.2668	46.8061	0	0		0.470184	0.539304	0.334318	0.453469	0.512361	0.343059
1.7	2.30294	143.337	131.373	171.615	57.2051	54.941	64.0417	42.2623	8.40719	59.7421	49.1859	457.752	264.564	155.731	328.572	108.314	149.566	64.4378	58.1196	0	0		0.465012	0.524781	0.323585	0.44448	0.497723	0.339759
1.8	2.30304	144.968	142.027	183.371	61.1238	60.1551	70.1194	46.2732	11.3922	68.4113	58.4445	461.068	282.495	168.244	350.84	131.376	168.404	75.051	70.4946	0	0		0.459904	0.511611	0.31395	0.435912	0.484668	0.337353
1.9	2.30315	146.117	151.756	193.833	64.611	65.0332	75.8056	50.0255	14.9529	77.0805	68.1171	463.44	298.408	179.647	370.603	156	186.811	85.8832	83.7073	0	0		0.454872	0.499784	0.305433	0.427815	0.473145	0.335734
2	2.30327	146.969	160.414	202.883	67.6277	69.4881	80.9984	53.4524	19.0689	85.5639	78.0017	464.144	312.128	189.767	387.643	181.694	204.401	96.7008	97.4946	0	0		0.449593	0.488951	0.297415	0.419838	0.462788	0.334492
2.1	2.30339	147.72	167.903	210.47	70.1567	73.4525	85.6195	56.502	23.6943	93.6842	87.8862	462.302	323.581	198.492	401.866	207.919	220.827	107.271	111.566	0	0		0.443747	0.478756	0.289274	0.411624	0.453239	0.333256
2.2	2.30352	147.72	174.182	216.611	72.2037	76.882	89.617	59.14	28.759	101.281	97.5588	459.928	332.797	205.775	413.312	234.108	235.794	117.371	125.619	0	0		0.43829	0.469603	0.282398	0.404269	0.444833	0.332663
2.3	2.30366	147.72	179.264	221.391	73.7971	79.7571	92.9683	61.3516	34.1725	108.219	106.817	456.697	339.911	211.636	422.147	259.698	249.078	126.804	139.35	0	0		0.432673	0.461292	0.275913	0.397161	0.437353	0.332206
2.4	2.3038	147.72	183.22	224.959	74.9863	82.0842	95.681	63.1417	39.828	114.393	115.48	452.322	345.155	216.161	428.66	284.153	260.531	135.398	152.472	0	0		0.426872	0.453648	0.269618	0.39026	0.430612	0.331746
2.5	2.30393	147.72	186.173	227.519	75.8396	83.8956	97.7925	64.5351	45.6075	119.734	123.39	446.571	348.847	219.496	433.246	306.988	270.092	143.027	164.725	0	0		0.420884	0.446524	0.26334	0.383539	0.42445	0.331161
2.6	2.30406	147.72	188.291	229.323	76.4411	85.2475	99.3683	65.575	51.387	124.212	130.43	439.279	351.378	221.845	436.389	327.797	277.786	149.604	175.891	0	0		0.414725	0.439792	0.256931	0.376986	0.418733	0.330348
2.7	2.30418	147.72	189.785	230.66	76.8867	86.2176	100.499	66.3212	57.0426	127.836	136.519	430.352	353.189	223.454	438.638	346.266	283.725	155.094	185.801	0	0		0.408432	0.433347	0.250269	0.370602	0.413344	0.329216
2.8	2.30429	147.72	190.891	231.838	77.2794	86.9014	101.296	66.8473	62.4561	130.657	141.625	419.774	354.755	224.606	440.583	362.19	288.104	159.513	194.346	0	0		0.402069	0.427103	0.243261	0.364405	0.408189	0.327692
2.9	2.30438	147.72	191.866	231.838	77.2794	87.408	101.887	67.2369	67.5208	132.763	145.757	407.607	354.518	225.602	440.289	375.483	291.188	162.924	201.479	0	0		0.395609	0.420942	0.23529	0.357153	0.402882	0.325524
3	2.30444	147.72	191.866	231.838	77.2794	87.8545	102.407	67.5804	72.1461	134.273	148.974	393.986	354.281	225.452	439.371	386.181	293.301	165.439	207.219	0	0		0.38872	0.414326	0.227408	0.350167	0.39768	0.322843
3.1	2.30447	147.72	191.866	231.838	77.2794	87.8545	102.407	67.5804	76.2622	135.338	151.374	379.116	354.045	225.302	438.37	394.44	294.814	167.21	211.651	0	0		0.382099	0.408087	0.219253	0.343566	0.392579	0.320107
3.2	2.30447	147.72	191.866	231.838	77.2794	87.8545	102.407	67.5804	79.8228	136.127	153.097	363.262	353.81	225.152	437.124	400.529	296.123	168.424	214.918	0	0		0.375528	0.401695	0.210723	0.336812	0.387366	0.31694
3.3	2.30443	147.72	191.866	231.838	77.2794	87.8545	102.407	67.5804	82.8079	136.823	154.311	346.731	353.575	225.002	435.481	404.818	295.927	169.293	217.22	0	0		0.368599	0.395115	0.201978	0.329946	0.382009	0.313142
3.4	2.30434	147.72	191.866	231.838	77.2794	87.8545	102.407	67.5804	85.2241	136.823	155.21	329.866	353.341	224.853	433.308	407.759	295.731	170.045	218.797	0	0		0.362071	0.388811	0.193201	0.323019	0.376879	0.30932
3.5	2.3042	147.72	191.866	231.398	77.2794	87.8545	102.407	67.5804	87.1048	136.823	156.003	313.024	353.107	224.704	430.498	409.864	295.535	169.933	219.927	0	0		0.355838	0.382731	0.184148	0.3158	0.371714	0.305339
3.6	2.30401	147.72	191.866	230.898	77.2794	87.8545	102.407	67.5804	88.5084	136.823	156.003	296.56	352.874	224.556	426.974	411.686	295.34	169.821	220.905	0	0		0.349719	0.376751	0.175908	0.309068	0.367007	0.301649
3.7	2.30376	147.72	191.866	230.223	77.2794	87.8545	102.407	67.5804	89.5155	136.823	156.003	280.814	352.641	224.408	422.693	411.415	295.145	169.709	220.759	0	0		0.343815	0.370694	0.167604	0.302095	0.362026	0.297505
3.8	2.30344	147.72	191.866	229.266	77.2794	87.8545	102.407	67.5804	90.2255	136.823	156.003	266.09	351.944	224.26	417.647	411.144	294.951	169.597	220.614	0	0		0.338083	0.364829	0.159622	0.295107	0.357212	0.293479
3.9	2.30306	147.72	191.866	227.932	77.2794	87.8545	102.407	67.5804	90.7515	136.823	156.003	252.645	351.186	224.113	411.865	410.874	294.758	169.486	220.469	0	0		0.33271	0.359348	0.152225	0.288256	0.35272	0.289699
4	2.30261	147.72	191.866	226.145	77.2794	87.8545	102.407	67.5804	91.2151	136.823	156.003	240.679	350.245	223.966	405.41	409.586	294.564	169.375	220.325	0	0		0.327722	0.354275	0.145395	0.281525	0.34832	0.285981
4.1	2.30208	147.72	191.866	223.848	77.2794	87.8545	102.407	67.5804	91.2151	136.823	156.003	230.32	349.007	223.82	398.376	408.162	294.372	169.264	220.181	0	0		0.323429	0.349951	0.139439	0.275197	0.344488	0.282684
4.2	2.30149	147.72	191.866	221.012	77.2794	87.8545	102.407	67.5804	91.2151	136.823	156.003	221.623	347.375	223.674	390.886	406.337	294.18	169.153	220.037	0	0		0.31962	0.346143	0.134049	0.269036	0.340969	0.279622
4.3	2.30082	147.72	191.866	217.628	77.2794	87.8545	102.407	67.5804	91.2151	136.823	156.003	214.565	345.269	223.528	383.083	403.862	293.988	169.043	219.893	0	0		0.316326	0.342884	0.129196	0.263067	0.337722	0.27676
4.4	2.30008	147.72	191.501	213.716	77.2794	87.8545	102.407	67.5804	91.2151	136.823	156.003	209.047	342.63	223.383	375.125	400.522	293.797	168.933	219.75	0	0		0.313553	0.340181	0.125062	0.257522	0.334876	0.274182
4.5	2.29926	147.72	191.088	209.32	77.2794	87.8545	102.407	67.5804	91.2151	136.823	156.003	204.901	339.427	223.237	367.178	396.141	293.606	168.823	219.608	0	0		0.311278	0.338012	0.121344	0.252212	0.332197	0.271717
4.6	2.29837	147.72	190.529	204.507	77.2794	87.8545	102.407	67.5804	91.2151	136.823	156.003	201.892	335.654	223.093	359.406	390.593	293.416	168.714	219.465	0	0		0.309452	0.336324	0.11799	0.24718	0.329648	0.269332
4.7	2.2974	147.72	189.736	199.362	77.2794	87.8545	102.407	67.5804	91.2151	136.823	156.003	199.735	331.333	222.948	351.967	383.808	293.226	168.605	219.323	0	0		0.308	0.335039	0.114927	0.242449	0.327186	0.266993
4.8	2.29636	147.809	188.632	193.987	77.2794	87.8545	102.407	67.5804	91.2151	136.823	156.003	198.106	326.51	222.804	345.002	375.773	293.036	168.496	219.182	0	0		0.306773	0.334054	0.112002	0.237973	0.324756	0.264622
4.9	2.29525	147.91	187.152	188.495	77.2794	87.8545	102.407	67.5804	91.2151	136.823	156.003	196.657	321.256	222.661	338.631	366.535	292.847	168.387	219.04	0	0		0.305703	0.333248	0.109159	0.233784	0.322299	0.262204
5	2.29406	148.047	185.251	183.002	77.2794	87.8545	102.407	67.5804	91.2151	136.823	156.003	196.53	315.661	222.518	332.944	356.196	292.122	168.279	218.899	0	0		0.304969	0.333003	0.10709	0.230412	0.320171	0.259895
5.1	2.29279	148.241	182.902	177.627	77.2794	87.8545	102.407	67.5804	91.2151	136.823	156.003	196.404	309.833	222.375	328.002	344.912	291.325	168.171	218.759	0	0		0.304261	0.332851	0.10514	0.227434	0.31805	0.257534
5.2	2.29146	148.511	180.1	172.482	77.2794	87.8545	102.407	67.5804	91.2151	136.823	156.003	196.278	303.89	222.232	323.831	332.882	290.317	168.063	218.619	0	0		0.303496	0.332765	0.103364	0.224907	0.315973	0.255117
5.3	2.29006	148.873	176.861	167.669	77.2794	87.8545	102.407	67.5804	91.2151	136.823	156.003	196.153	297.955	222.09	320.42	320.34	288.967	167.956	218.479	0	0		0.302595	0.332715	0.101811	0.222866	0.313978	0.252639
5.4	2.28859	149.338	173.221	163.273	77.2794	87.8545	102.407	67.5804	91.2151	136.823	156.003	196.027	292.151	221.948	317.723	307.544	287.16	167.848	218.339	0	0		0.301479	0.332669	0.100521	0.221323	0.312097	0.250097
5.5	2.28705	149.912	169.236	159.362	77.2794	87.8545	102.407	67.5804	91.2151	136.823	156.003	195.902	286.594	221.807	315.662	294.765	284.805	167.741	218.2	0	0		0.30008	0.332593	0.0995223	0.220264	0.310362	0.247492
5.6	2.28546	150.597	164.976	155.978	77.2794	87.8545	102.407	67.5804	91.2151	136.823	156.003	195.778	281.39	221.666	314.128	282.272	281.835	167.635	218.061	0	0		0.298339	0.332454	0.0988292	0.219652	0.308795	0.244825
5.7	2.2838	151.389	160.525	153.141	77.2794	87.8545	102.407	67.5804	91.2151	136.823	156.003	195.653	276.629	221.525	312.989	270.322	278.213	167.528	217.923	0	0		0.296215	0.332221	0.0984427	0.219428	0.307411	0.242101
5.8	2.28209	152.279	155.978	150.845	77.2794	87.8545	102.407	67.5804	91.2151	136.823	156.003	195.529	272.378	221.384	312.096	259.144	273.932	167.422	217.785	0	0		0.29368	0.331869	0.0983484	0.219511	0.306216	0.239323
5.9	2.28033	153.254	151.43	149.057	77.2794	87.8545	102.407	67.5804	91.2151	136.823	155.751	195.406	268.682	221.244	311.286	248.936	269.017	167.316	217.647	0	0		0.290729	0.331377	0.0986969	0.219964	0.305357	0.236602
6	2.27853	154.295	146.979	147.723	77.2794	87.8545	102.407	67.5804	91.2151	136.823	155.464	195.282	265.561	221.818	311.089	239.845	263.523	167.21	217.509	0	0		0.287884	0.331249	0.0992924	0.220826	0.305145	0.234211
6.1	2.27669	155.383	142.719	146.766	77.2794	87.8545	102.407	67.5804	91.2151	136.823	155.078	195.159	263.005	222.488	310.893	231.971	257.53	167.105	217.372	0	0		0.284795	0.331088	0.100129	0.221841	0.305256	0.231926
6.2	2.27482	156.495	138.734	146.091	77.2794	87.8545	102.407	67.5804	91.2151	136.823	154.529	195.036	260.982	223.44	310.697	225.355	251.143	167	217.236	0	0		0.281634	0.33102	0.101187	0.222994	0.305806	0.229868
6.3	2.27292	157.607	135.094	145.592	77.2794	87.8545	102.407	67.5804	91.2151	136.823	153.765	194.914	259.433	224.847	310.502	219.979	244.487	166.895	217.099	0	0		0.278579	0.331167	0.102441	0.224267	0.306888	0.22815
6.4	2.27102	158.696	131.855	145.151	77.2794	87.8545	102.407	67.5804	91.2151	136.823	152.74	194.792	258.277	226.861	310.308	215.77	237.696	166.79	216.963	0	0		0.275807	0.33164	0.10385	0.225633	0.308572	0.226869
6.5	2.2691	159.737	129.053	145.151	77.2794	87.8545	102.407	67.5804	91.2151	136.77	151.424	194.67	257.416	229.606	310.114	212.598	230.915	166.686	216.827	0	0		0.273184	0.332206	0.105371	0.227064	0.310615	0.225915
6.6	2.26719	160.712	126.705	145.151	77.2794	87.8545	102.407	67.5804	91.2151	136.71	149.798	194.548	256.737	233.168	309.92	210.288	224.284	166.582	216.692	0	0		0.271037	0.333144	0.106953	0.228529	0.313198	0.225453
6.7	2.26529	161.602	124.803	145.151	77.2794	87.8545	102.407	67.5804	91.2151	136.629	147.859	194.427	256.12	237.599	309.727	208.623	217.939	166.478	216.557	0	0		0.269418	0.334436	0.108545	0.229993	0.316236	0.225465
6.8	2.26342	162.394	123.323	145.151	77.2794	87.8545	102.407	67.5804	91.2151	136.515	145.617	194.306	255.961	242.905	309.534	207.357	212.002	166.375	216.355	0	0		0.268547	0.336209	0.110362	0.231612	0.319793	0.226029
6.9	2.26158	163.079	122.219	145.151	77.2794	87.8545	102.407	67.5804	91.2151	136.356	143.098	194.185	255.802	249.056	309.342	206.228	206.576	166.271	216.145	0	0		0.268296	0.338309	0.112189	0.233241	0.323635	0.227007
7	2.25978	163.653	121.426	145.151	77.2794	87.8545	102.407	67.5804	91.2151	136.142	140.339	194.065	255.643	255.978	309.15	206.1	201.739	166.168	215.908	0	0		0.268673	0.340705	0.114038	0.234891	0.328035	0.228642
7.1	2.25804	164.118	120.868	145.151	77.2794	87.8545	102.407	67.5804	91.2151	135.867	137.39	193.945	255.485	263.564	308.959	205.973	197.543	166.065	215.629	0	0		0.269659	0.343351	0.115921	0.236576	0.332647	0.230663
7.2	2.25637	164.48	120.454	145.151	77.2794	87.8545	102.407	67.5804	91.2151	135.528	134.31	193.825	255.328	271.673	308.768	205.845	194.01	165.963	215.293	0	0		0.271203	0.346191	0.117848	0.238305	0.337445	0.233045
7.3	2.25478	164.75	120.089	145.151	77.2794	87.8545	102.407	67.5804	91.2151	135.123	131.162	193.706	255.17	280.143	308.097	205.719	191.131	165.861	214.888	0	0		0.273045	0.348991	0.119828	0.239889	0.342243	0.235623
7.4	2.25328	164.944	120.089	145.151	77.2794	87.8545	102.407	67.5804	91.2151	134.656	128.014	193.587	255.013	288.791	307.363	205.592	188.867	165.759	214.407	0	0		0.275245	0.351831	0.121555	0.241228	0.346869	0.238275
7.5	2.25188	165.08	120.089	145.151	77.2794	87.8545	102.407	67.5804	91.2151	134.13	124.934	193.468	254.857	297.429	306.439	205.466	187.15	165.657	213.845	0	0		0.277638	0.354596	0.123235	0.242455	0.35141	0.241014
7.6	2.2506	165.182	120.089	145.151	77.2794	87.8545	102.407	67.5804	91.2151	133.555	121.985	193.349	254.7	305.867	305.209	205.34	185.888	165.555	213.201	0	0		0.280055	0.357176	0.124801	0.243462	0.35573	0.243697
7.7	2.24946	165.271	120.089	145.151	77.2794	87.8545	102.407	67.5804	91.2151	132.939	119.226	193.231	254.545	313.927	303.571	205.214	184.965	165.454	212.477	0	0		0.28233	0.359475	0.126193	0.24415	0.359701	0.246184
7.8	2.24845	165.271	120.089	145.151	77.2794	87.8545	102.407	67.5804	91.2151	132.297	116.707	193.113	254.389	321.446	301.442	205.089	184.253	165.353	211.681	0	0		0.28437	0.361409	0.127434	0.244504	0.363217	0.24839
7.9	2.2476	165.271	120.089	145.151	77.2794	87.8545	102.407	67.5804	91.2151	131.64	114.465	192.995	254.234	328.288	298.762	204.964	183.614	165.252	210.823	0	0		0.28599	0.362909	0.12843	0.244412	0.366189	0.250173
8	2.24692	165.271	120.089	145.151	77.2794	87.8545	102.407	67.5804	91.2151	130.983	112.526	192.878	254.08	334.347	295.499	204.839	183.502	165.152	209.917	0	0		0.287301	0.36393	0.129167	0.243845	0.368555	0.251603
8.1	2.24642	165.271	120.089	145.151	77.2794	87.8545	102.407	67.5804	91.2151	130.34	110.9	192.761	253.925	339.556	291.646	204.715	183.391	165.052	208.976	0	0		0.288077	0.364443	0.129644	0.242794	0.370281	0.252521
8.2	2.24611	165.271	120.089	145.151	77.2794	87.8545	102.829	67.5804	91.2151	129.725	109.584	192.644	253.772	343.883	287.226	204.591	183.279	164.952	208.019	0	0		0.288309	0.364443	0.129873	0.240976	0.37136	0.252743
8.3	2.24601	165.271	120.089	145.151	77.2794	87.8545	103.308	67.5804	91.2151	129.15	108.56	192.528	253.618	347.343	282.286	204.467	183.169	164.852	207.064	0	0		0.288011	0.363946	0.129876	0.23868	0.371813	0.252447
8.4	2.24612	165.271	120.089	145.151	77.2794	87.8545	103.955	67.5804	91.2151	128.624	107.795	192.411	253.465	349.986	276.9	204.344	183.058	164.752	206.127	0	0		0.287219	0.36299	0.129687	0.235885	0.371688	0.251629
8.5	2.24646	165.271	120.089	145.151	77.2794	87.8545	104.872	67.5804	91.2151	128.156	107.246	192.295	253.312	351.903	271.162	204.221	182.948	165.702	205.227	0	0		0.28599	0.361632	0.129984	0.233046	0.371375	0.250576
8.6	2.24703	165.271	120.089	145.151	77.2794	87.8545	106.15	67.5804	91.2151	127.752	106.86	192.18	253.16	353.217	265.182	204.098	182.838	166.792	204.378	0	0		0.284403	0.359948	0.13027	0.229802	0.370702	0.249102
8.7	2.24785	165.271	120.089	145.151	77.2794	87.8545	107.863	67.5804	91.2151	127.413	106.573	192.064	253.008	354.081	259.082	203.975	182.728	168.296	203.592	0	0		0.282552	0.35803	0.130766	0.226324	0.369871	0.247343
8.8	2.24892	165.271	120.089	145.151	77.2794	87.8545	110.063	67.5804	91.2151	127.138	106.321	192.51	252.856	354.664	252.989	203.853	182.619	170.47	202.881	0	0		0.280755	0.356177	0.13202	0.223047	0.369261	0.245596
8.9	2.25024	165.271	120.089	145.151	77.2794	87.8545	112.781	67.5804	91.2151	126.924	106.321	193.031	252.705	355.153	247.031	203.731	182.509	173.537	202.251	0	0		0.27895	0.354336	0.1337	0.219751	0.368749	0.243774
9	2.25183	165.271	120.089	145.151	77.2794	87.8545	116.024	67.5804	91.2151	126.765	106.321	193.773	252.86	354.941	241.329	203.61	182.4	177.676	201.703	0	0		0.27713	0.352501	0.136375	0.216957	0.368551	0.242027
9.1	2.25368	165.271	120.089	145.151	77.2794	87.8545	119.772	67.5804	91.2151	126.65	106.321	194.874	253.056	354.73	235.992	203.489	182.292	183.018	201.238	0	0		0.27556	0.350922	0.140026	0.214735	0.36892	0.240581
9.2	2.25581	165.271	120.089	145.151	77.2794	87.8545	123.984	67.5804	91.2151	126.57	106.321	196.451	253.373	354.519	231.111	203.368	182.183	189.635	200.85	0	0		0.274361	0.349711	0.144785	0.21328	0.369971	0.239556
9.3	2.25821	165.271	120.089	145.515	77.2794	87.8545	128.596	67.5804	91.2151	126.51	106.321	198.602	253.886	354.309	226.758	203.247	182.075	197.541	200.53	0	0		0.273394	0.348698	0.150715	0.212742	0.371545	0.238893
9.4	2.26089	165.271	120.089	145.928	77.2794	87.8545	133.526	67.5804	91.2151	126.457	106.321	201.397	254.658	354.099	222.979	203.127	181.968	206.688	200.268	0	0		0.272952	0.348188	0.157808	0.213216	0.373884	0.238796
9.5	2.26386	165.271	120.089	146.486	77.2794	88.5863	138.676	67.5804	91.2151	126.457	106.321	204.873	255.744	353.89	219.793	203.006	181.86	216.969	200.048	0	0		0.272497	0.347577	0.165989	0.214247	0.376879	0.23893
9.6	2.2671	165.271	120.089	147.277	77.2794	89.4165	143.939	67.5804	91.2151	126.457	106.321	209.038	257.18	353.681	217.193	202.887	181.753	228.226	199.855	0	0		0.272439	0.34731	0.175121	0.216246	0.380447	0.239548
9.7	2.27064	165.271	120.089	148.379	77.2794	90.5372	149.202	67.5804	91.2151	126.457	106.321	213.866	258.988	353.473	215.143	202.767	181.646	240.254	199.672	0	0		0.272585	0.347171	0.185017	0.219009	0.384443	0.240507
9.8	2.27446	165.271	120.089	149.856	77.2794	92.1271	154.352	67.5804	91.2151	126.457	106.321	219.301	261.172	353.265	213.584	202.648	181.539	252.811	199.554	0	0		0.272728	0.346961	0.195492	0.222331	0.3887	0.241669
9.9	2.27856	165.679	120.089	151.753	77.2794	94.3426	159.282	67.5804	91.2151	126.457	106.321	225.258	263.718	353.058	212.43	202.529	181.432	265.632	199.437	0	0		0.2724	0.34645	0.205967	0.225674	0.393044	0.242696
10	2.28295	166.141	120.089	154.097	77.2794	97.3114	163.894	67.5804	91.2151	126.457	106.321	231.627	266.595	352.851	211.582	202.411	181.326	278.438	199.32	0	0		0.27165	0.345449	0.216474	0.229021	0.397302	0.243579
10.1	2.28763	166.765	120.089	156.894	77.2794	101.125	168.106	67.5804	91.2151	126.457	106.321	238.279	269.756	352.645	210.922	202.292	181.22	290.952	199.204	0	0		0.270251	0.343803	0.2267	0.23207	0.401312	0.244136
10.2	2.29258	167.651	120.089	160.126	77.2794	105.837	171.854	67.5804	91.2151	126.457	106.321	245.072	273.143	352.439	210.327	202.174	181.115	302.909	199.088	0	0		0.268016	0.341394	0.23636	0.234547	0.404931	0.244206
10.3	2.29781	168.885	120.089	163.758	77.2794	111.458	175.096	67.5804	91.8678	126.457	106.321	251.858	276.684	352.234	210.204	202.057	181.009	314.071	198.972	0	0		0.264594	0.337879	0.244718	0.236026	0.407779	0.243531
10.4	2.30331	170.539	120.089	167.736	77.2794	117.955	177.815	67.5804	92.6082	126.457	106.321	258.487	280.302	352.029	210.082	201.939	180.904	324.238	198.856	0	0		0.260143	0.333512	0.251999	0.236543	0.410026	0.242156
10.5	2.30909	172.663	120.089	171.987	77.2794	125.256	180.015	67.5804	93.6078	126.457	106.321	264.819	283.916	351.825	209.96	202.771	180.799	333.254	198.741	0	0		0.254579	0.328235	0.257927	0.235913	0.411776	0.240204
10.6	2.31512	175.288	120.089	176.429	77.2794	133.251	181.728	67.5804	95.0258	126.457	106.321	270.726	287.445	351.621	209.839	203.73	180.694	341.019	198.626	0	0		0.24788	0.322038	0.262293	0.234011	0.412717	0.237426
10.7	2.32141	178.419	120.089	180.967	78.0987	141.796	183.006	67.5804	97.0019	126.457	106.321	276.102	290.812	351.418	209.717	205.065	180.59	347.489	198.511	0	0		0.239606	0.314427	0.264371	0.230776	0.412853	0.233563
10.8	2.32795	182.038	120.089	185.506	79.028	150.723	183.923	67.5804	99.6498	126.457	106.321	280.862	293.948	351.216	209.596	207.005	180.486	352.682	198.397	0	0		0.230289	0.305964	0.264621	0.226212	0.412221	0.228966
10.9	2.33473	186.105	120.089	189.948	80.2826	159.846	184.57	67.5804	103.052	126.457	106.321	284.954	296.795	351.014	209.476	209.753	180.382	356.675	198.282	0	0		0.219955	0.296638	0.262912	0.220382	0.410889	0.223674
11	2.34176	190.558	120.089	194.199	82.0624	168.969	185.048	67.5804	107.254	126.457	106.321	288.354	299.306	350.812	209.356	213.472	180.278	359.6	198.169	0	0		0.208684	0.286484	0.259202	0.213408	0.408957	0.217759
11.1	2.34901	195.319	120.089	198.176	84.5426	177.897	185.471	67.5804	112.267	126.457	106.321	291.072	301.453	350.611	209.236	218.28	180.175	361.638	198.055	0	0		0.196609	0.275584	0.253544	0.205458	0.406547	0.211328
11.2	2.35648	200.291	120.089	201.809	87.8659	186.442	185.471	67.5804	118.062	126.457	106.321	293.148	303.223	350.41	209.116	224.242	180.072	363.012	197.942	0	0		0.1839	0.264056	0.246088	0.196996	0.403804	0.204676
11.3	2.36418	205.373	120.501	205.041	92.1355	194.437	185.471	67.5804	124.574	126.457	106.321	294.654	304.622	350.21	208.996	231.371	179.969	363.976	197.829	0	0		0.170758	0.252055	0.236794	0.187883	0.400652	0.197706
11.4	2.37208	210.455	120.968	207.837	97.4102	201.738	185.471	67.5804	131.705	126.457	106.321	295.686	305.671	350.011	208.877	239.623	179.867	364.8	197.716	0	0		0.157406	0.239757	0.226218	0.178626	0.39746	0.190737
11.5	2.38019	215.428	121.599	210.182	103.702	208.235	185.471	67.5804	139.326	126.457	106.321	296.363	306.409	349.811	208.758	248.903	179.764	364.592	197.603	0	0		0.144075	0.227355	0.214188	0.169076	0.394051	0.183666
11.6	2.38849	220.188	122.493	212.079	110.975	213.856	185.471	67.5804	147.289	126.457	106.321	296.82	306.889	349.613	208.64	259.066	179.662	364.385	197.491	0	0		0.130994	0.215051	0.201367	0.159761	0.390708	0.176819
11.7	2.39699	224.642	123.74	213.556	119.149	218.567	185.471	67.5804	155.426	126.457	106.321	297.203	307.176	349.415	208.522	269.928	179.56	364.179	197.379	0	0		0.118382	0.203041	0.188038	0.150837	0.387465	0.170277
11.8	2.40566	228.709	125.411	214.658	128.098	222.381	185.471	67.5804	163.563	126.457	106.321	297.035	307.343	349.217	208.404	281.269	179.459	363.973	197.268	0	0		0.106209	0.191292	0.17425	0.142222	0.384206	0.163971
11.9	2.41452	232.328	127.557	215.449	137.664	225.35	185.471	67.5804	171.525	126.457	106.321	296.868	307.47	349.02	208.286	292.849	179.358	363.767	197.156	0	0		0.0947954	0.180115	0.160482	0.13418	0.381053	0.158047
12	2.42354	235.459	130.208	216.007	147.658	227.566	185.471	67.5804	179.147	126.457	106.321	296.7	307.297	348.823	208.169	304.416	179.256	363.562	197.045	0	0		0.0841049	0.169485	0.146842	0.126635	0.377916	0.152437
12.1	2.43273	238.083	133.371	216.42	157.871	229.156	185.471	67.5804	186.277	126.457	106.321	296.534	307.124	348.627	208.052	315.72	179.948	363.412	196.934	0	0		0.0745708	0.159549	0.133674	0.11971	0.374843	0.14737
12.2	2.44207	240.208	137.027	216.784	168.084	230.276	185.471	67.5804	192.789	126.457	106.321	296.367	306.952	348.432	207.935	326.52	180.745	363.268	196.824	0	0		0.0659366	0.150325	0.121133	0.113359	0.371793	0.142647
12.3	2.45157	241.862	141.136	216.784	178.077	231.106	185.471	67.5804	198.584	126.457	106.321	296.201	306.78	348.236	207.819	336.601	181.856	363.147	196.714	0	0		0.0584195	0.142002	0.109369	0.107541	0.368944	0.13839
12.4	2.46121	243.096	145.635	216.784	187.643	231.838	185.471	67.5804	203.597	126.457	106.321	296.036	306.608	348.042	207.702	345.781	183.473	363.06	196.604	0	0		0.0519132	0.13441	0.0984959	0.102195	0.36613	0.134508
12.5	2.47098	243.981	150.443	216.784	196.593	231.838	185.471	68.2715	207.8	126.457	106.321	295.87	306.437	347.848	207.586	353.92	185.764	363.019	196.494	0	0		0.0467681	0.1276	0.088239	0.0976061	0.363029	0.131043
12.6	2.48089	244.606	155.467	216.784	204.766	231.838	185.471	69.0556	211.202	126.457	106.321	295.706	306.267	347.654	207.471	360.927	188.866	363.033	196.385	0	0		0.0427289	0.121553	0.0789542	0.093442	0.359959	0.128
12.7	2.49093	245.068	160.601	216.784	212.04	231.838	185.616	70.1141	213.849	126.457	106.321	295.541	306.096	347.461	207.356	366.763	192.876	363.11	196.276	0	0		0.0397992	0.1162	0.0705527	0.0896157	0.356848	0.125314
12.8	2.50109	245.476	165.735	216.784	218.331	231.838	185.78	71.6156	215.826	126.457	106.321	295.377	305.927	347.268	207.241	371.442	197.851	363.252	196.167	0	0		0.0379359	0.111445	0.0629197	0.0861424	0.353628	0.122978
12.9	2.51137	245.476	170.758	216.784	223.606	231.838	186.002	73.7081	217.244	126.457	106.321	295.214	305.757	347.076	207.126	375.035	203.799	363.46	196.058	0	0		0.0372339	0.107172	0.0561412	0.0831503	0.350238	0.121057
13	2.52177	245.476	175.567	216.784	227.876	231.838	186.317	76.5119	218.243	126.457	106.321	295.051	305.588	346.884	207.011	377.661	210.686	363.732	195.95	0	0		0.037443	0.103249	0.0499142	0.0804275	0.34663	0.119392
13.1	2.53229	245.476	180.066	216.798	231.199	231.838	186.756	80.114	218.984	126.51	106.321	294.888	305.42	346.693	206.897	379.485	218.431	364.062	195.842	0	0		0.0384102	0.0995022	0.0441207	0.077928	0.342736	0.117911
13.2	2.54293	245.476	184.174	216.815	233.679	231.855	187.345	84.5641	219.636	126.57	106.321	294.92	305.51	346.502	206.783	380.708	226.914	364.443	195.734	0	0		0.0401551	0.095969	0.0388267	0.0757549	0.338669	0.116663
13.3	2.55368	245.192	187.831	216.837	235.459	231.874	188.101	89.8724	219.636	126.65	106.321	294.979	305.636	346.311	206.67	381.559	235.979	364.864	196.369	0	0		0.0427454	0.0929588	0.0345192	0.074412	0.334674	0.115928
13.4	2.56454	244.871	190.993	216.869	236.714	231.899	189.034	96.0087	219.636	126.765	106.321	295.115	305.864	346.098	206.556	382.284	245.446	365.312	197.103	0	0		0.045715	0.0899065	0.0304924	0.0733321	0.330544	0.115318
13.5	2.57551	244.436	193.645	216.912	237.643	231.935	190.148	102.904	219.636	126.924	106.321	295.375	306.257	345.882	207.129	382.074	255.113	365.774	198.131	0	0		0.0492208	0.0871202	0.0268495	0.0729035	0.326317	0.114814
13.6	2.58659	243.82	195.791	216.971	238.462	231.985	191.436	110.455	219.636	127.138	106.321	295.802	306.871	345.657	207.793	381.866	264.769	366.236	199.633	0	0		0.0529393	0.0844294	0.0236774	0.0730297	0.322132	0.114479
13.7	2.59778	242.962	197.462	217.047	238.462	232.053	192.883	118.525	219.636	127.413	106.321	296.427	307.75	345.418	208.729	381.658	274.205	366.684	201.767	0	0		0.0571772	0.0823461	0.0214546	0.0738688	0.318092	0.11458
13.8	2.60908	241.812	198.708	217.14	238.462	232.139	194.467	126.957	219.636	127.752	106.854	297.277	308.926	345.159	210.102	380.621	283.221	367.104	204.66	0	0		0.0616334	0.0807042	0.0197095	0.0753195	0.313856	0.114658
13.9	2.62048	240.334	199.603	217.251	238.462	232.246	196.16	135.573	219.636	128.156	107.46	298.363	310.416	344.877	212.059	379.475	291.637	367.484	208.406	0	0		0.0663143	0.0796699	0.0187471	0.0776524	0.309892	0.115037
14	2.63199	238.508	200.234	217.38	238.462	232.374	197.93	144.189	219.636	128.624	108.277	299.689	312.225	344.568	214.717	378.002	299.302	367.813	213.055	0	0		0.071214	0.0793745	0.018563	0.0808388	0.306155	0.115674
14.1	2.6436	236.33	200.701	217.525	238.462	232.521	199.738	152.62	219.636	129.15	109.436	301.246	314.341	344.232	218.162	376.001	306.097	368.084	218.616	0	0		0.0763147	0.0799078	0.0191151	0.0848048	0.302595	0.116512
14.2	2.65531	233.813	201.113	217.683	238.125	232.687	201.546	160.691	219.636	129.725	111.051	303.013	316.737	343.866	222.441	373.295	311.947	368.292	225.058	0	0		0.0817196	0.0814545	0.0204714	0.0894353	0.299152	0.117573
14.3	2.66711	230.984	201.113	217.852	237.742	232.868	203.315	168.242	219.636	130.34	113.215	304.963	319.375	343.474	227.564	369.742	316.819	368.434	232.303	0	0		0.0872771	0.0838904	0.0225969	0.0947737	0.295967	0.11883
14.4	2.67902	227.886	201.113	218.029	237.226	233.062	205.008	175.137	219.636	130.983	115.996	307.056	322.203	343.057	233.498	365.239	320.726	368.511	240.24	0	0		0.0929767	0.0872064	0.0252654	0.100518	0.292845	0.120157
14.5	2.69101	224.575	201.113	218.21	236.493	233.264	206.593	181.273	219.636	131.64	119.432	309.247	325.162	342.618	240.175	359.729	323.726	368.528	248.724	0	0		0.0988007	0.0913513	0.0284037	0.10652	0.289766	0.121529
14.6	2.70309	221.116	201.113	218.391	235.471	233.471	208.039	186.582	219.636	132.297	123.529	311.489	328.187	342.162	247.491	353.2	325.919	368.49	257.584	0	0		0.104725	0.096236	0.0319187	0.112618	0.286712	0.122919
14.7	2.71526	217.581	201.113	218.568	234.103	233.678	209.327	191.032	219.636	132.939	128.266	313.728	331.209	341.695	255.312	345.691	327.442	368.408	266.631	0	0		0.110719	0.10174	0.0357023	0.118652	0.283662	0.124301
14.8	2.72752	214.046	201.113	218.737	232.344	233.88	210.441	194.634	219.636	133.555	133.589	315.913	334.159	341.223	263.48	337.285	328.463	368.292	275.669	0	0		0.116751	0.107721	0.0396368	0.12447	0.2806	0.125648
14.9	2.73985	210.587	201.113	218.895	230.172	234.074	211.375	197.438	219.636	134.13	139.418	317.996	336.973	340.751	271.821	328.107	329.173	368.156	284.501	0	0		0.122783	0.114017	0.0436006	0.129932	0.277506	0.126935
15	2.75227	207.276	201.113	219.04	227.581	234.255	212.13	199.53	219.636	134.656	145.648	319.932	339.592	340.286	280.154	318.321	329.778	368.013	292.94	0	0		0.128777	0.12046	0.047473	0.134921	0.274367	0.12814
15.1	2.76477	204.178	201.113	219.169	224.586	234.421	212.719	201.032	219.636	135.123	152.157	321.683	341.965	339.834	288.296	308.115	329.603	367.818	300.816	0	0		0.13443	0.126878	0.051117	0.139326	0.271156	0.129066
15.2	2.77734	201.349	201.113	219.28	221.22	234.568	213.158	202.09	219.636	135.528	158.808	323.221	344.055	339.401	296.076	297.7	329.429	367.623	307.988	0	0		0.139886	0.133102	0.054443	0.143093	0.267873	0.129816
15.3	2.78998	198.832	201.113	219.373	217.535	234.696	213.473	202.874	219.636	135.867	165.46	324.528	345.837	338.99	303.336	287.297	329.255	367.429	314.346	0	0		0.145057	0.138976	0.0573555	0.14618	0.264512	0.130341
15.4	2.80269	196.654	201.113	219.449	213.595	234.803	213.695	203.565	219.636	136.142	171.968	325.595	347.3	338.605	309.946	277.125	329.081	367.235	319.819	0	0		0.14987	0.144355	0.0597773	0.148577	0.26107	0.130604
15.5	2.81545	194.828	201.253	219.508	209.48	234.889	213.86	203.565	219.636	136.356	178.198	326.425	348.448	338.249	315.805	267.392	328.908	367.042	324.374	0	0		0.154268	0.149429	0.0619175	0.150245	0.257808	0.130735
15.6	2.82825	193.35	201.412	219.552	205.274	234.956	214.005	203.565	219.636	136.515	184.027	327.033	349.301	337.922	320.845	258.287	328.735	366.85	328.026	0	0		0.158209	0.153897	0.0635819	0.151276	0.254574	0.130626
15.7	2.8411	192.2	201.626	219.583	201.069	235.007	214.005	203.565	219.636	136.629	189.35	327.442	349.89	337.624	325.039	249.969	328.563	366.657	330.827	0	0		0.161673	0.157756	0.0648155	0.151789	0.251432	0.130348
15.8	2.85397	191.341	201.93	219.605	196.953	235.043	214.005	203.565	219.636	136.71	194.087	327.688	350.261	337.354	328.398	242.56	328.391	366.466	332.872	0	0		0.16466	0.161027	0.0656813	0.151817	0.248442	0.129918
15.9	2.86685	190.725	202.354	219.622	193.014	235.068	214.005	203.565	219.636	136.77	198.185	327.811	350.469	337.107	330.972	236.141	328.22	366.274	334.288	0	0		0.167192	0.163753	0.0662571	0.151472	0.245658	0.129392
16	2.87974	190.291	202.922	219.636	189.328	235.087	214.005	203.565	219.636	136.823	201.62	327.857	350.575	336.882	332.848	230.745	328.14	366.083	335.235	0	0		0.169335	0.166	0.0666331	0.150878	0.243126	0.12885
16.1	2.89262	189.969	203.652	219.636	185.962	235.104	214.005	203.565	219.636	136.823	204.401	327.878	350.648	336.671	334.143	226.36	328.073	365.893	335.89	0	0		0.171156	0.167883	0.0669075	0.150169	0.240909	0.128359
16.2	2.90546	189.686	204.554	219.636	182.967	235.104	214.005	203.565	219.636	136.823	206.565	327.708	350.466	336.47	335.005	222.924	328.043	365.703	336.447	0	0		0.172578	0.169346	0.0670006	0.149346	0.238889	0.127884
16.3	2.91827	189.686	205.629	219.636	180.376	235.104	214.005	203.565	219.636	136.823	208.181	327.538	350.284	336.273	335.597	220.333	328.071	365.514	336.273	0	0		0.173662	0.17036	0.0667016	0.148276	0.237158	0.127315
16.4	2.93102	189.686	206.872	219.636	178.204	235.104	214.005	203.565	219.636	136.823	209.34	327.369	350.103	336.099	336.099	218.444	328.177	365.325	336.099	0	0		0.174578	0.171187	0.0663494	0.147293	0.235696	0.126848
16.5	2.94369	189.686	208.269	219.636	176.446	235.104	214.005	203.565	219.636	136.823	210.157	327.2	349.923	335.926	335.926	217.08	328.378	365.137	335.926	0	0		0.175158	0.171652	0.0659046	0.146192	0.234273	0.126316
16.6	2.95627	189.686	209.799	219.636	175.077	235.104	214.079	203.618	219.636	136.823	210.762	327.032	349.742	335.753	335.753	216.042	328.683	364.949	335.753	0	0		0.17561	0.171938	0.0653106	0.145093	0.23294	0.125759
16.7	2.96875	189.686	211.434	219.636	174.056	234.542	214.164	203.679	219.636	136.823	211.296	326.864	349.563	335.58	335.58	215.115	329.101	364.761	335.58	0	0		0.176183	0.17231	0.0645576	0.144195	0.231619	0.125284
16.8	2.9811	189.686	213.142	219.636	173.323	233.905	214.278	203.76	219.636	136.823	211.296	326.696	349.408	335.408	335.408	215.005	329.631	364.574	335.408	0	0		0.176709	0.172595	0.0638766	0.143498	0.230679	0.125039
16.9	2.9933	189.686	214.888	219.715	172.806	233.044	214.44	203.875	219.636	136.823	211.296	326.529	349.258	335.236	335.236	214.895	330.269	364.387	335.236	0	0		0.177239	0.172839	0.0630795	0.142856	0.229681	0.124769
17	3.00535	189.686	216.633	219.804	172.424	231.824	214.665	204.036	219.636	136.823	211.296	326.362	349.118	335.065	335.065	214.785	331.008	364.201	335.065	0	0		0.177891	0.173156	0.0622133	0.14233	0.228666	0.124546
17.1	3.01722	189.686	218.341	219.924	172.086	230.123	214.967	204.251	219.636	136.823	211.296	326.388	348.994	334.894	334.894	214.676	331.831	364.016	334.99	0	0		0.178796	0.173705	0.061433	0.14206	0.227684	0.124473
17.2	3.02889	189.686	219.976	220.095	172.086	227.844	215.356	204.528	219.636	136.823	211.296	326.44	348.892	334.771	334.724	214.567	332.723	363.831	334.929	0	0		0.179828	0.174339	0.0605425	0.142024	0.226711	0.124463
17.3	3.04035	189.686	221.506	220.333	172.086	224.916	215.835	204.869	219.636	136.823	211.296	326.568	348.816	334.654	334.625	214.458	333.661	363.646	334.905	0	0		0.181168	0.17525	0.0597208	0.142302	0.225774	0.124633
17.4	3.05159	189.686	222.903	220.652	172.086	221.299	216.407	205.277	219.636	136.823	211.296	326.82	348.77	334.555	334.536	214.349	334.623	363.462	334.944	0	0		0.182822	0.176456	0.0590051	0.142923	0.224877	0.124995
17.5	3.06258	189.686	224.146	221.062	172.086	216.984	217.069	205.748	219.636	136.823	211.296	327.235	348.754	334.487	334.475	214.241	335.584	363.278	335.064	0	0		0.184806	0.177985	0.0584279	0.143924	0.224043	0.12557
17.6	3.07331	189.686	225.222	221.568	172.086	211.996	217.812	206.277	219.636	136.823	211.296	327.848	348.769	334.459	334.46	214.133	336.52	363.094	335.283	0	0		0.187117	0.179851	0.0580148	0.145324	0.223294	0.126366
17.7	3.08376	189.447	226.123	222.172	172.086	206.391	218.626	206.857	219.636	136.823	211.338	328.682	348.814	334.479	334.506	214.025	337.408	362.912	335.612	0	0		0.189841	0.182051	0.0578637	0.1472	0.222628	0.127431
17.8	3.09393	189.176	226.853	222.87	172.086	200.254	219.496	207.476	219.636	136.823	211.386	329.75	348.887	334.554	334.624	213.917	338.227	362.729	336.059	0	0		0.192862	0.184568	0.0579145	0.14947	0.222072	0.128712
17.9	3.1038	188.81	227.421	223.654	172.086	193.694	220.405	208.124	219.651	136.823	211.451	331.055	348.984	334.685	334.824	213.81	338.96	362.547	336.624	0	0		0.196155	0.18736	0.0581824	0.152112	0.221622	0.130196
18	3.11335	188.291	227.845	224.513	172.086	186.84	221.334	208.785	219.668	136.823	211.543	332.588	349.1	334.874	335.111	213.703	339.593	362.366	337.303	0	0		0.199698	0.190387	0.0586832	0.155097	0.221281	0.131869
18.1	3.12258	187.567	228.149	225.431	172.086	179.837	222.262	209.446	219.691	136.823	211.672	334.33	349.228	335.118	335.486	213.596	340.118	362.185	338.086	0	0		0.203446	0.193589	0.0594149	0.158376	0.221037	0.133703
18.2	3.13146	186.598	228.364	226.39	172.086	172.833	223.171	210.094	219.723	136.823	211.843	336.252	349.364	335.414	335.945	213.49	340.53	362.004	338.96	0	0		0.207347	0.196898	0.0603647	0.161883	0.220877	0.135663
18.3	3.14	185.352	228.522	227.37	172.086	165.98	224.041	210.713	219.768	136.823	212.064	338.315	349.499	335.753	336.481	213.383	340.831	361.824	339.904	0	0		0.211341	0.200238	0.0615097	0.165542	0.220783	0.137706
18.4	3.14818	183.814	228.662	228.35	172.086	159.42	224.855	211.293	219.829	136.823	212.337	340.477	349.628	336.128	337.084	213.277	341.028	361.644	340.897	0	0		0.215364	0.203535	0.0628181	0.169271	0.220733	0.139788
18.5	3.15597	181.979	228.662	229.309	172.086	153.282	225.598	211.822	219.906	136.823	212.663	342.688	349.745	336.526	337.739	213.172	341.132	361.465	341.915	0	0		0.219349	0.206715	0.0643151	0.173046	0.220765	0.141901
18.6	3.16339	179.857	228.662	230.227	172.086	147.677	226.26	212.293	220.002	136.823	213.039	344.896	349.842	336.937	338.43	213.066	341.159	361.286	342.933	0	0		0.223233	0.20971	0.065914	0.176739	0.220816	0.143973
18.7	3.1704	177.473	228.662	231.086	172.086	142.69	226.832	212.701	220.116	136.823	213.462	347.052	349.917	337.347	339.14	212.961	341.129	361.108	343.924	0	0		0.226957	0.212462	0.0675805	0.180284	0.220875	0.145967
18.8	3.17701	174.862	228.662	231.87	172.086	138.375	227.311	213.042	220.248	136.823	213.925	349.107	349.964	337.745	339.85	212.856	341.063	360.93	344.865	0	0		0.230468	0.214923	0.069277	0.18362	0.220931	0.147853
18.9	3.18319	172.072	228.662	232.568	172.086	134.758	227.7	213.319	220.397	136.823	214.42	351.016	349.982	338.118	340.54	212.751	340.985	360.752	345.733	0	0		0.233725	0.21706	0.0709651	0.186697	0.220974	0.149602
19	3.18894	169.157	228.662	233.172	172.086	131.83	228.002	213.534	220.56	136.823	214.937	352.744	349.97	338.457	341.194	212.647	340.818	360.524	346.511	0	0		0.236671	0.218857	0.0725884	0.189462	0.22098	0.151167
19.1	3.19425	166.178	228.679	233.678	172.358	129.551	228.227	213.695	220.733	136.823	215.466	354.261	349.927	338.752	341.794	212.543	340.651	360.289	347.185	0	0		0.239187	0.220195	0.0740091	0.191899	0.220945	0.152482
19.2	3.1991	163.199	228.697	234.088	172.666	127.85	228.389	213.81	220.915	137.258	215.994	355.548	349.857	338.996	342.327	212.439	340.485	360.034	347.744	0	0		0.241175	0.221004	0.0752915	0.193999	0.2207	0.153489
19.3	3.20349	160.284	228.722	234.407	173.083	126.629	228.503	213.891	221.101	137.753	216.512	356.599	349.761	339.185	342.783	212.335	340.318	359.746	348.185	0	0		0.24278	0.221444	0.0763731	0.195767	0.220377	0.154261
19.4	3.2074	157.493	228.757	234.645	173.673	125.769	228.588	213.952	221.286	138.42	217.007	357.416	349.644	339.317	343.154	212.232	340.153	359.415	348.509	0	0		0.243943	0.221484	0.0772004	0.197219	0.219925	0.154758
19.5	3.21082	154.883	228.806	234.815	174.496	125.132	228.662	214.005	221.468	139.367	217.47	358.013	349.512	339.392	343.439	212.129	339.988	359.031	348.725	0	0		0.244626	0.221109	0.0777314	0.198389	0.2193	0.154952
19.6	3.21375	152.499	228.871	234.936	175.599	124.57	228.662	214.005	221.641	140.686	217.893	358.414	349.371	339.414	343.637	212.026	339.823	358.589	348.842	0	0		0.244814	0.220349	0.0779627	0.199359	0.218488	0.154866
19.7	3.21618	150.377	228.955	235.025	177.016	124.57	228.662	214.005	221.804	142.454	218.269	358.653	349.226	339.39	343.755	212.347	339.758	358.084	348.879	0	0		0.244259	0.218942	0.0778651	0.199902	0.217551	0.154415
19.8	3.21809	148.542	229.059	235.104	178.766	124.57	228.662	214.005	221.953	144.725	218.595	358.77	349.057	339.326	343.801	212.724	339.708	357.517	348.856	0	0		0.243148	0.217105	0.0774369	0.200254	0.216383	0.153639
19.9	3.21948	147.003	229.183	235.104	180.854	124.57	228.662	214.005	222.085	147.531	218.868	358.812	348.889	339.233	343.787	213.269	339.697	356.888	348.795	0	0		0.241527	0.214888	0.0767078	0.200441	0.215049	0.152593
20	3.22034	145.758	229.326	235.104	183.268	124.57	228.662	214.005	222.199	150.878	219.088	358.829	348.721	339.122	343.729	214.084	339.751	356.204	348.721	0	0		0.239396	0.212293	0.0757133	0.200492	0.213565	0.151304
20.1	3.22066	144.788	229.487	235.104	185.98	124.57	228.662	214.005	222.295	154.747	219.26	358.657	348.554	339.005	343.643	215.26	339.89	355.472	348.554	0	0		0.236757	0.209283	0.0743882	0.200352	0.211929	0.149771
20.2	3.22044	144.065	229.664	235.104	188.95	124.57	228.662	214.005	222.372	159.095	219.389	358.485	348.387	338.842	343.548	216.87	340.132	354.702	348.387	0	0		0.233718	0.205971	0.0728646	0.200117	0.210219	0.148092
20.3	3.21968	143.546	229.852	235.104	192.124	124.57	227.626	214.005	222.433	163.856	219.481	358.314	346.636	338.68	343.384	218.965	340.49	353.907	348.221	0	0		0.229918	0.201967	0.0706242	0.199781	0.208085	0.146283
20.4	3.21837	143.18	230.049	235.104	195.44	124.57	226.449	214.005	222.478	168.945	219.546	358.143	344.673	338.519	343.22	221.576	340.97	353.099	348.055	0	0		0.225845	0.197732	0.068199	0.199391	0.205919	0.144444
20.5	3.2165	142.909	230.25	235.087	198.829	124.57	224.861	214.048	222.51	174.261	219.594	357.533	342.085	338.358	343.057	224.708	341.573	352.292	347.889	0	0		0.221372	0.193089	0.0653202	0.198848	0.203542	0.142537
20.6	3.21408	142.67	230.452	235.068	202.218	124.57	222.609	214.097	222.533	179.694	219.636	356.864	338.484	338.197	342.894	228.342	342.295	351.499	347.724	0	0		0.216593	0.188118	0.0620541	0.198279	0.200997	0.140684
20.7	3.2111	142.67	230.648	235.043	205.535	124.57	219.47	214.164	222.55	185.126	219.636	356.022	333.535	338.036	342.731	232.435	343.127	350.735	346.78	0	0		0.211372	0.182541	0.0579147	0.197366	0.198219	0.138707
20.8	3.20757	142.67	230.837	235.007	208.709	124.57	215.263	214.259	222.565	190.443	219.636	354.899	326.963	336.351	342.569	236.924	344.052	350.01	345.732	0	0		0.205343	0.176069	0.0531019	0.196345	0.194749	0.136497
20.9	3.20347	142.67	231.013	234.956	211.679	124.57	209.859	214.39	222.565	195.531	219.636	353.402	318.573	334.463	342.51	241.725	345.052	349.334	344.377	0	0		0.19888	0.169013	0.0474505	0.195166	0.190883	0.134281
21	3.19882	142.67	231.174	234.889	214.391	124.57	203.183	214.567	222.565	200.292	219.636	351.456	308.252	331.971	342.465	246.741	346.102	348.716	342.525	0	0		0.191823	0.161151	0.0408121	0.193717	0.186452	0.131922
21.1	3.19361	142.67	231.318	234.803	216.804	124.57	195.22	214.794	222.565	204.64	219.636	349.004	295.982	328.506	342.46	251.865	347.179	348.159	340.01	0	0		0.184068	0.15232	0.0330768	0.191933	0.181341	0.129311
21.2	3.18784	142.67	231.442	234.696	218.892	124.57	186.014	215.074	222.565	208.509	219.636	346.018	281.832	323.743	342.521	256.984	348.254	347.667	336.698	0	0		0.175526	0.142379	0.0241706	0.189759	0.175456	0.126347
21.3	3.18152	142.67	231.546	234.568	220.643	124.57	175.669	215.408	222.565	211.856	219.636	342.49	265.964	317.418	342.67	261.987	349.303	347.238	332.493	0	0		0.166134	0.131216	0.0140585	0.187151	0.16873	0.122937
21.4	3.17466	142.67	231.63	234.421	222.059	124.57	164.342	215.794	222.565	214.662	219.636	338.441	248.616	309.343	342.924	266.766	350.299	346.868	327.338	0	0		0.15585	0.118752	0.00274699	0.184078	0.161123	0.119004
21.5	3.16724	142.67	231.695	234.255	223.162	124.57	152.234	216.228	222.565	216.933	219.463	333.916	230.099	299.41	343.296	271.225	351.219	346.552	321.226	0	0		0.144663	0.104942	-0.00964391	0.1806	0.152689	0.114528
21.6	3.15928	142.67	231.744	234.074	223.985	124.57	139.585	216.703	221.561	218.701	219.266	328.98	210.777	287.599	343.794	275.282	352.045	346.28	314.19	0	0		0.133011	0.0901837	-0.0226787	0.177107	0.143763	0.109682
21.7	3.15078	142.67	231.779	233.88	224.576	124.57	126.659	217.212	220.423	220.02	219	323.72	191.052	273.981	344.417	278.876	352.762	346.041	306.309	0	0		0.120582	0.074174	-0.0365433	0.173264	0.134103	0.104243
21.8	3.14175	142.67	231.804	233.678	224.992	124.57	113.733	217.742	218.886	220.967	218.622	318.236	171.346	258.707	345.163	281.964	353.359	345.823	297.701	0	0		0.107576	0.0571121	-0.050929	0.169261	0.123914	0.0982961
21.9	3.13218	142.67	231.822	233.471	225.301	124.57	101.084	218.285	216.705	221.635	218.097	312.641	152.079	242.009	346.019	284.53	353.834	345.612	288.519	0	0		0.0942194	0.0392457	-0.0654955	0.165303	0.113426	0.0919502
22	3.12209	142.67	231.838	233.264	225.572	124.57	88.9769	218.827	213.667	222.129	217.392	307.052	133.65	224.186	346.972	286.58	354.186	345.452	278.941	0	0		0.0807681	0.0208685	-0.0798556	0.161631	0.10291	0.0853481
22.1	3.11149	142.67	231.838	233.062	225.572	124.57	77.6495	219.358	209.595	222.565	216.487	301.585	116.421	205.588	348.001	288.146	354.424	345.293	269.166	0	0		0.0676256	0.00243943	-0.0935284	0.158461	0.0926257	0.0787168
22.2	3.10037	142.67	231.838	232.868	225.572	124.57	67.3047	219.866	204.365	222.565	215.369	296.35	100.696	186.602	349.082	289.279	354.561	345.134	259.399	0	0		0.0552002	-0.0155556	-0.106235	0.156004	0.0830245	0.0722986
22.3	3.08875	142.67	231.838	232.687	225.572	124.57	58.099	220.341	197.903	222.565	214.036	291.449	86.711	167.634	350.19	290.054	354.613	344.976	249.848	0	0		0.0436589	-0.0328362	-0.117612	0.154457	0.0742517	0.0662038
22.4	3.07662	142.67	231.838	232.521	225.572	124.57	50.1355	220.775	190.195	222.565	212.494	286.966	74.6186	149.088	351.297	290.561	354.602	344.818	240.71	0	0		0.0333293	-0.0489537	-0.127349	0.153982	0.066588	0.0606503
22.5	3.06401	142.67	231.838	232.374	225.572	124.57	43.4594	221.161	181.284	222.565	210.761	282.966	64.4848	131.349	352.376	290.902	354.552	343.103	232.162	0	0		0.024492	-0.063495	-0.136035	0.154099	0.0597424	0.0554608
22.6	3.05091	142.67	231.838	232.246	225.572	124.57	38.0555	221.496	171.271	222.565	208.864	279.492	56.2841	114.765	353.401	291.187	354.489	341.18	224.353	0	0		0.0173608	-0.0761115	-0.142843	0.155361	0.0543307	0.0511183
22.7	3.03732	142.67	230.802	232.139	225.572	124.57	33.8492	221.776	160.307	222.565	206.837	276.561	49.901	99.6282	354.349	291.055	354.327	338.642	217.399	0	0		0.0120146	-0.0865493	-0.147532	0.158163	0.0505525	0.0477872
22.8	3.02327	142.67	229.626	232.053	224.562	124.57	30.71	222.003	148.588	222.565	204.718	274.167	45.1359	86.1657	355.201	290.922	354.166	335.109	211.376	0	0		0.00897315	-0.0942486	-0.150336	0.161812	0.048049	0.0455722
22.9	3.00875	142.67	228.038	231.985	223.415	124.57	28.4574	222.179	136.345	221.572	202.553	272.278	41.7139	74.5252	355.94	290.79	354.006	330.251	206.316	0	0		0.00821769	-0.0991514	-0.151883	0.166189	0.047093	0.044483
23	2.99377	142.67	225.786	231.935	221.868	124.57	26.8695	222.311	123.833	220.446	200.389	270.839	39.2982	64.7699	356.558	290.659	353.846	323.798	202.206	0	0		0.00929448	-0.101649	-0.152415	0.171141	0.0471569	0.0442801
23.1	2.97834	142.67	222.647	231.899	219.673	124.57	25.6932	222.405	111.322	218.925	198.27	269.772	37.5059	56.8751	357.049	290.528	352.092	315.557	198.99	0	0		0.01142	-0.101807	-0.152238	0.176494	0.0480973	0.0445705
23.2	2.96245	142.67	218.441	231.874	216.613	124.57	24.6564	222.472	99.0783	216.768	196.243	268.986	35.9254	50.73	357.416	290.397	350.127	305.419	196.569	0	0		0.0150907	-0.0998263	-0.151712	0.182062	0.0497228	0.0456988
23.3	2.94612	142.67	213.038	231.855	212.514	124.57	24.6564	222.521	87.359	213.763	194.346	268.372	35.9092	46.1422	357.666	290.266	347.532	293.363	194.808	0	0		0.0207372	-0.0950565	-0.150139	0.187674	0.052488	0.0476295
23.4	2.92935	142.67	206.363	231.838	207.247	124.074	24.6564	222.565	76.3949	209.735	192.613	267.818	35.8931	42.8473	357.812	290.136	343.919	279.46	193.543	0	0		0.0276096	-0.0883053	-0.148605	0.193423	0.0557107	0.0502297
23.5	2.91214	142.164	198.401	231.838	200.741	123.511	24.6564	222.565	66.3819	204.561	191.071	267.698	35.877	40.521	357.872	290.006	338.95	263.867	192.584	0	0		0.0356799	-0.07975	-0.146686	0.199407	0.0594862	0.0534834
23.6	2.8945	141.591	189.197	231.838	192.98	122.75	24.6564	222.565	57.4714	198.169	189.738	267.578	35.861	38.7946	357.867	289.876	332.35	246.819	191.729	0	0		0.0443294	-0.0698496	-0.144944	0.205149	0.0635564	0.0570014
23.7	2.87643	140.817	178.854	231.838	184.008	121.672	24.6564	222.565	49.7633	190.544	188.62	267.459	35.845	37.2722	357.822	289.747	323.92	228.621	191.644	0	0		0.0534142	-0.0583723	-0.14279	0.211117	0.0678304	0.0609345
23.8	2.85794	139.719	167.529	231.838	173.926	120.17	24.6564	222.565	43.3013	181.729	187.715	267.34	35.829	37.2556	357.763	289.618	313.549	209.631	191.558	0	0		0.063631	-0.0449655	-0.140561	0.217184	0.0729175	0.0655245
23.9	2.83904	138.189	155.423	231.838	162.886	118.156	24.6564	222.565	38.0707	171.824	187.01	267.221	35.8131	37.2391	357.604	288.224	301.217	190.245	191.473	0	0		0.0742604	-0.0305173	-0.138078	0.223522	0.0776953	0.0700129
24	2.81972	136.139	142.777	231.838	151.087	115.57	24.6564	222.565	33.9993	160.978	186.484	267.102	35.7972	37.2226	357.446	286.661	286.994	170.876	191.388	0	0		0.0854111	-0.0150031	-0.135148	0.230403	0.082701	0.0748107
24.1	2.8	133.506	129.853	230.799	138.759	112.374	24.6564	222.565	30.9608	149.385	186.107	266.984	35.7814	37.2061	357.288	284.597	271.042	151.937	191.304	0	0		0.0977942	0.00209775	-0.13157	0.238061	0.0883741	0.0802592
24.2	2.77987	130.252	116.929	229.62	126.161	108.563	24.6564	221.574	28.7805	137.274	185.841	266.866	35.7656	37.1897	357.13	281.725	253.602	133.822	191.219	0	0		0.110976	0.0208018	-0.12654	0.246725	0.0947006	0.086387
24.3	2.75935	126.371	104.282	228.028	113.564	104.156	24.6564	220.451	27.2435	124.898	185.644	266.749	35.7499	37.1733	355.372	277.776	234.984	116.886	191.135	0	0		0.124385	0.0397992	-0.120336	0.255836	0.100573	0.0924397
24.4	2.73844	121.884	92.1766	225.769	101.236	99.2049	24.6564	218.935	26.1049	112.521	185.471	266.632	35.7341	37.1569	353.4	272.531	215.557	101.428	191.051	0	0		0.139016	0.0600823	-0.112604	0.266232	0.106805	0.0990247
24.5	2.71714	116.843	80.8512	222.622	89.4366	93.7831	24.6564	216.783	25.1013	100.41	185.471	266.515	35.7185	37.1406	350.794	265.832	195.723	87.6796	190.967	0	0		0.154942	0.0816309	-0.103141	0.277684	0.113307	0.106101
24.6	2.69546	111.322	70.5081	218.406	78.3971	87.9878	24.6564	213.785	25.1013	88.817	185.471	266.398	35.7028	37.1244	347.167	257.591	175.907	75.7915	190.884	0	0		0.171339	0.103651	-0.0923985	0.289162	0.119486	0.113252
24.7	2.6734	105.421	61.304	212.988	68.3152	81.9335	24.6564	209.768	25.1013	77.9711	185.471	266.282	35.6872	37.1081	342.176	247.792	156.531	65.8286	190.8	0	0		0.188755	0.126589	-0.0797238	0.301075	0.125756	0.120776
24.8	2.65097	99.2568	53.3419	206.295	59.3434	75.7465	24.6564	204.607	25.1013	68.0661	185.471	266.165	35.6717	37.092	335.545	236.491	137.997	57.7659	190.717	0	0		0.206987	0.150252	-0.065227	0.312939	0.131951	0.128542
24.9	2.62818	92.9571	46.6668	198.312	51.5823	69.5595	24.6564	198.231	25.1013	59.2517	185.471	266.05	35.6561	37.0758	327.075	223.816	120.67	51.49	190.634	0	0		0.225797	0.174459	-0.0491146	0.324251	0.13791	0.136408
25	2.60502	86.6574	41.2638	189.083	45.0758	63.5051	24.6564	190.625	25.1013	51.6267	185.471	265.934	35.6407	37.0597	316.655	209.958	104.854	46.8047	190.551	0	0		0.24492	0.199045	-0.0316798	0.334517	0.143479	0.144226
25.1	2.5815	80.4928	37.0583	178.712	39.8092	57.7099	24.6564	181.833	25.1013	45.2343	185.471	264.752	35.6252	37.0437	304.262	195.165	90.7875	43.4398	190.469	0	0		0.263392	0.223257	-0.0142792	0.342711	0.147929	0.151399
25.2	2.55763	74.592	33.9197	167.356	35.7098	52.2881	24.6564	171.953	25.1013	40.0601	185.471	263.429	35.6098	37.0276	289.97	179.728	78.6243	41.0644	190.386	0	0		0.281471	0.247502	0.00353959	0.348899	0.151607	0.158142
25.3	2.53342	69.0714	31.6675	155.218	32.6504	47.3366	24.6564	161.135	25.1013	36.0327	185.471	261.683	35.5944	37.0117	273.939	163.968	68.4307	39.3017	190.304	0	0		0.298683	0.271541	0.0211117	0.352596	0.154234	0.164199
25.4	2.50886	64.0297	30.0798	142.538	30.455	42.9304	24.6564	149.572	25.1013	33.0269	185.471	259.257	35.5791	36.9957	256.411	148.222	60.1811	37.7472	190.222	0	0		0.314589	0.295188	0.0378125	0.353412	0.15554	0.169335
25.5	2.48397	59.5432	28.9037	129.579	28.9075	39.1187	24.6564	137.492	25.1013	30.8701	185.471	255.922	35.5638	36.9798	237.701	132.825	53.7597	37.731	190.14	0	0		0.328822	0.318326	0.0547732	0.352068	0.156424	0.174212
25.6	2.45875	55.6621	27.867	116.62	27.7611	35.9231	24.6564	125.146	25.1013	29.3497	185.471	251.495	35.5486	36.964	218.175	118.098	48.9657	37.7148	190.059	0	0		0.341132	0.340925	0.0705002	0.347818	0.156051	0.178213
25.7	2.4332	52.4084	27.867	103.94	26.7506	33.3366	24.6564	112.801	25.1013	28.2234	185.471	245.844	35.5333	36.9481	198.241	104.328	45.5227	37.6987	189.977	0	0		0.351421	0.363067	0.0837234	0.339402	0.153406	0.180595
25.8	2.40734	49.7747	27.867	91.8018	26.7506	31.3233	24.6564	100.721	25.1013	27.2306	185.471	238.893	35.5182	36.9324	178.324	91.7596	43.0919	37.6826	189.896	0	0		0.357795	0.383346	0.0940473	0.32808	0.14937	0.181176
25.9	2.38118	47.7247	27.867	80.446	26.7506	29.8207	24.6564	89.1577	25.1013	27.2306	185.471	230.629	35.503	36.9166	158.849	80.5804	41.2881	37.6665	189.815	0	0		0.359484	0.401202	0.102203	0.313987	0.142671	0.17959
26	2.35472	46.1948	27.867	70.0753	26.7506	28.7425	24.6564	78.3394	25.1013	27.2306	184.673	221.099	35.4879	36.9009	140.22	70.9135	39.6974	37.6505	189.735	0	0		0.357434	0.417427	0.108886	0.29847	0.134984	0.176975
26.1	2.32798	45.097	27.867	60.8464	26.7506	27.9825	24.6564	68.4596	25.1013	27.2306	183.768	210.411	35.4729	36.8853	122.803	62.8113	39.6805	37.6345	189.654	0	0		0.352815	0.431525	0.113064	0.281052	0.125371	0.173643
26.2	2.30096	44.3231	27.867	52.8629	26.7506	27.4195	24.6564	59.6677	25.1013	27.2306	182.546	198.726	35.4578	36.8696	106.906	56.2536	39.6637	37.6186	189.574	0	0		0.344329	0.443066	0.114931	0.262576	0.113984	0.168942
26.3	2.27368	43.7498	27.867	46.17	26.7506	26.9232	24.6564	52.0621	25.1013	27.2306	180.812	186.253	35.4429	36.8541	92.7666	51.1483	39.6469	37.6027	189.494	0	0		0.332325	0.451746	0.114824	0.244006	0.101117	0.163302
26.4	2.24615	43.2444	27.867	40.7525	26.7506	26.9232	24.6564	45.686	25.1013	27.2306	178.397	173.236	35.4279	36.8385	80.5401	47.336	39.6302	37.5868	189.414	0	0		0.316139	0.456296	0.11322	0.225567	0.0872112	0.156695
26.5	2.21838	43.2444	27.867	36.5357	26.7506	26.9232	24.6564	40.525	25.1013	27.2306	175.16	159.948	35.413	36.823	70.2933	44.5971	39.6135	37.571	189.334	0	0		0.296102	0.457483	0.109891	0.207976	0.0728329	0.149495
26.6	2.19038	43.2444	27.867	33.3886	26.7506	26.9232	24.6564	36.5078	25.1013	27.2306	171.001	146.671	35.3981	36.8075	62.0005	42.6625	39.5969	37.5552	189.254	0	0		0.273965	0.45544	0.106047	0.192593	0.0586315	0.142623
26.7	2.16218	43.2444	27.867	31.1304	26.7506	26.9232	24.6564	33.5097	25.1013	27.2306	165.864	133.688	35.3833	36.7921	55.5454	41.226	39.5803	37.5394	189.175	0	0		0.250553	0.45062	0.102279	0.17997	0.0452791	0.136487
26.8	2.13379	43.2444	27.867	29.5384	26.7506	26.9232	24.6564	31.3584	25.1013	27.2306	159.736	121.269	35.3685	36.7767	50.726	39.9587	39.5637	37.5237	189.096	0	0		0.226848	0.443787	0.0992369	0.170537	0.0334013	0.131467
26.9	2.10522	43.2444	27.867	28.3592	26.7506	26.9232	24.6564	29.8418	25.1013	27.2306	152.652	109.657	35.3537	36.7614	47.2647	39.942	39.5472	37.5081	189.017	0	0		0.20389	0.435968	0.0976055	0.164556	0.0258301	0.129183
27	2.07649	43.2444	27.867	27.3197	26.7506	26.9232	24.6564	28.7184	25.1013	27.2306	144.692	99.0567	35.339	36.746	44.8209	39.9254	39.5308	37.4924	188.193	0	0		0.182667	0.427609	0.0970477	0.161199	0.0216812	0.12841
27.1	2.04761	43.2444	27.867	27.3197	26.7506	26.9232	24.6564	27.7282	25.1013	27.2306	135.975	89.6272	35.3243	36.7308	43.0074	39.9088	39.5143	37.4769	187.269	0	0		0.160738	0.417541	0.0990483	0.161037	0.0196158	0.128721
27.2	2.01861	43.2444	27.867	27.3197	26.7506	26.9232	24.6564	27.7282	25.1013	27.2306	126.658	81.472	35.3096	36.7155	41.408	39.8922	39.4979	37.4613	186.05	0	0		0.140723	0.405717	0.101909	0.163454	0.019383	0.129728
27.3	1.98949	43.2444	27.867	27.3197	26.7506	26.9232	24.6564	27.7282	25.1013	27.2306	116.925	74.6353	35.295	36.7003	41.3909	39.8757	39.4816	37.4458	184.356	0	0		0.12605	0.39616	0.106976	0.169958	0.0254515	0.133771
27.4	1.96029	43.2444	27.867	27.3197	26.7506	26.9232	24.6564	27.7282	25.1013	27.2306	106.978	69.1002	35.2804	36.6852	41.3738	39.8593	39.4653	37.4303	182.026	0	0		0.113771	0.387069	0.113786	0.178135	0.0348726	0.138957
27.5	1.93102	43.2444	27.867	27.3197	26.7506	26.9232	24.6564	27.7282	25.1013	27.2306	97.0312	64.7891	35.2659	36.67	41.3567	39.8428	39.449	37.4149	178.933	0	0		0.103935	0.378253	0.121746	0.18742	0.0472943	0.144843
27.6	1.9017	43.2444	27.867	27.3197	26.7506	26.9232	24.6564	27.7282	25.1013	27.2306	87.2977	61.5677	35.2514	36.655	41.3397	39.8264	39.4328	37.3995	174.983	0	0		0.096405	0.369469	0.130142	0.19714	0.0621494	0.150925
27.7	1.87236	43.2444	27.867	27.3197	26.7506	26.9232	24.6564	27.7282	25.1013	27.2306	77.9807	59.2508	35.2369	36.6399	41.3227	39.8101	39.4166	37.3842	170.124	0	0		0.0908697	0.360427	0.138173	0.20655	0.0786761	0.156657
27.8	1.84301	43.2444	27.867	27.3197	26.7506	26.9232	24.6564	27.7282	25.1013	27.2306	69.2642	57.6118	35.2225	36.6249	41.3058	39.7938	39.4004	37.3688	164.347	0	0		0.0868697	0.350808	0.144983	0.214862	0.0959612	0.161476
27.9	1.81367	43.2444	27.867	27.3197	26.7506	26.9232	24.6564	27.7282	25.1013	27.2306	61.3038	56.3926	35.2081	36.6099	41.2889	39.7775	39.3843	37.3536	157.685	0	0		0.0838337	0.340266	0.149697	0.221279	0.113001	0.164834
28	1.78437	43.2444	27.867	27.3197	26.7506	26.9232	24.6564	27.7282	25.1013	27.2306	54.2198	55.316	35.1937	36.595	41.2721	39.7613	39.3682	37.3383	150.213	0	0		0.081119	0.328444	0.151457	0.225035	0.128775	0.16622
28.1	1.75513	43.2444	27.867	27.3197	26.7506	26.9232	24.6564	27.7282	25.1013	27.2306	48.0918	55.2935	35.1794	36.5801	41.2553	39.7451	39.3522	37.3231	142.043	0	0		0.0809167	0.316709	0.151627	0.227249	0.144706	0.166545
28.2	1.72596	43.2444	27.867	27.3197	26.7506	26.9232	24.6564	27.7282	25.1013	27.2306	42.9544	55.271	35.1651	36.5652	41.2385	39.7289	39.3362	37.308	133.322	0	0		0.0807149	0.303727	0.148271	0.226261	0.158392	0.164634
28.3	1.6969	43.2444	27.867	27.3197	26.7506	26.9232	24.6564	27.7282	25.1013	27.2306	38.796	55.2486	35.1508	36.5504	41.2218	39.7128	39.3203	37.2928	124.221	0	0		0.0805134	0.289647	0.141427	0.222101	0.169683	0.160579
28.4	1.66796	43.2444	27.867	27.3197	26.7506	26.9232	24.6564	27.7282	25.1013	27.2306	35.5593	55.2263	35.1366	36.5356	41.2051	39.6968	39.3044	37.2777	114.93	0	0		0.0803124	0.274676	0.131336	0.214982	0.178588	0.154594
28.5	1.63915	43.2444	27.867	27.3197	26.7506	26.9232	24.6564	27.7282	25.1013	27.2306	33.1436	55.204	35.1224	36.5209	41.1885	39.6807	39.2885	37.2627	105.646	0	0		0.0801118	0.259072	0.118444	0.205304	0.185279	0.147009
28.6	1.61051	43.2444	27.867	27.3197	26.7506	26.9232	24.6564	27.7282	25.1013	27.2306	31.4102	55.1817	35.1083	36.5061	41.1719	39.6647	39.2727	37.2477	96.5671	0	0		0.0799116	0.243149	0.103403	0.193652	0.190076	0.138259
28.7	1.58204	43.2444	27.867	27.3197	26.7506	26.9232	24.6564	27.7282	25.1013	27.2306	30.1883	55.1596	35.0942	36.4915	41.1553	39.6488	39.2569	37.2327	87.8825	0	0		0.0797118	0.227258	0.0870389	0.180766	0.193427	0.128863
28.8	1.55377	43.2444	27.867	27.3197	26.7506	26.9232	24.6564	27.7282	25.1013	27.2306	29.2831	55.1374	35.0801	36.4768	41.1388	39.6329	39.2411	37.2178	79.7618	0	0		0.0795124	0.211775	0.0703109	0.167509	0.195873	0.119396
28.9	1.52571	43.2444	27.867	27.3197	26.7506	26.9232	24.6564	27.7282	25.1013	27.2306	28.4853	55.1154	35.066	36.4622	41.1223	39.617	39.2254	37.2029	72.3487	0	0		0.0793135	0.197077	0.054251	0.154813	0.198017	0.110455
29	1.49788	43.2444	27.867	27.3197	26.7506	26.9232	24.6564	27.7282	25.1013	27.2306	28.4853	55.0933	35.052	36.4477	41.1059	39.6012	39.2098	37.188	65.7541	0	0		0.0791149	0.183519	0.0373677	0.141096	0.197825	0.101055
29.1	1.47029	43.2444	27.867	27.3197	26.7506	26.9232	24.6564	27.7282	25.1013	27.2306	28.4853	55.0714	35.038	36.4331	41.0895	39.5854	39.1941	37.1732	60.0504	0	0		0.0789168	0.171399	0.0222537	0.128848	0.197633	0.0927407
29.2	1.44296	43.2444	27.867	27.3197	26.7506	26.9232	24.6564	27.7282	25.1013	27.2306	28.4853	55.0495	35.0241	36.4186	41.0732	39.5697	39.1785	37.1584	55.2687	0	0		0.078719	0.160934	0.00919013	0.118285	0.197442	0.0856249
29.3	1.4159	43.2444	27.867	27.3197	26.7506	26.9232	24.6564	27.7282	25.1013	27.2306	28.4853	55.0276	35.0102	36.4042	41.0569	39.5539	39.163	37.1436	51.3971	0	0		0.0785217	0.152237	-0.0016721	0.109514	0.197251	0.0797498
29.4	1.38914	43.2444	27.867	27.3197	26.7506	26.9232	24.6564	27.7282	25.1013	27.2306	28.4853	55.0058	34.9963	36.3897	41.0406	39.5383	39.1475	37.1289	48.3815	0	0		0.0783248	0.145304	-0.0103307	0.102527	0.197061	0.0750841
29.5	1.36268	43.2444	27.867	27.3197	26.7506	26.9232	24.6564	27.7282	25.1013	27.2306	28.4853	54.9841	34.9825	36.3754	41.0244	39.5226	39.132	37.1142	46.1279	0	0		0.0781283	0.140011	-0.0169362	0.0971946	0.196871	0.0715239
29.6	1.33654	43.2444	27.867	27.3197	26.7506	26.9232	24.6564	27.7282	25.1013	27.2306	28.4853	54.9624	34.9687	36.361	41.0082	39.5071	39.1165	37.0996	44.5069	0	0		0.0779322	0.13612	-0.0217818	0.0932768	0.196681	0.0688988
29.7	1.31073	43.2444	27.867	27.3197	26.7506	26.9232	24.6564	27.7282	25.1013	27.2306	28.4853	54.9407	34.9549	36.3467	40.992	39.4915	39.1011	37.085	43.36	0	0		0.0777365	0.133301	-0.025281	0.0904391	0.196492	0.066983
29.8	1.28528	43.2444	27.867	27.3197	26.7506	26.9232	24.6564	27.7282	25.1013	27.2306	28.4853	54.9191	34.9412	36.3324	40.9759	39.476	39.0858	37.0704	42.5067	0	0		0.0775412	0.131152	-0.0279373	0.0882767	0.196303	0.0655093
29.9	1.2602	43.2444	27.867	27.3197	26.7506	26.9232	24.6564	27.7282	25.1013	27.2306	28.4853	54.8976	34.9275	36.3182	40.9599	39.4605	39.0705	37.0559	41.7531	0	0		0.0773463	0.129228	-0.0303115	0.0863407	0.196114	0.0641845
30	1.2355	43.2444	27.867	27.3197	26.7506	26.9232	24.6564	27.7282	25.1013	27.2306	28.4853	54.8761	34.9138	36.304	40.9438	39.4451	39.0552	37.0414	41.7368	0	0		0.0771519	0.129036	-0.030507	0.0861465	0.195926	0.0639897
30.1	1.2112	43.2444	27.867	27.3197	26.7506	26.9232	24.6564	27.7282	25.1013	27.2306	28.4853	54.8547	34.9002	36.2898	40.9279	39.4297	39.0399	37.0269	41.7205	0	0		0.0769578	0.128844	-0.030702	0.0859527	0.195738	0.0637952
30.2	1.18732	43.2444	27.867	27.3197	26.7506	26.9232	24.6564	27.7282	25.1013	27.2306	28.4853	54.8333	34.8866	36.2757	40.9119	39.4143	39.0247	37.0125	41.7042	0	0		0.0767641	0.128652	-0.0308967	0.0857594	0.195551	0.0636012
30.3	1.16387	43.2444	27.867	27.3197	26.7506	26.9232	24.6564	27.7282	25.1013	27.2306	28.4853	54.812	34.873	36.2616	40.896	39.399	39.0095	36.9981	41.688	0	0		0.0765709	0.128461	-0.0310909	0.0855664	0.195364	0.0634076
30.4	1.14087	43.2444	27.867	27.3197	26.7506	26.9232	24.6564	27.7282	25.1013	27.2306	28.4853	54.7908	34.8595	36.2475	40.8802	39.3837	38.9944	36.9838	41.6718	0	0		0.076378	0.12827	-0.0312847	0.0853738	0.195177	0.0632144
30.5	1.11834	43.2444	27.867	27.3197	26.7506	26.9232	24.6564	27.7282	25.1013	27.2306	28.4853	54.7696	34.846	36.2335	40.8643	39.3685	38.9793	36.9694	41.6557	0	0		0.0761855	0.12808	-0.0314781	0.0851816	0.194991	0.0630215
30.6	1.0963	43.2444	27.867	27.3197	26.7506	26.9232	24.6564	27.7282	25.1013	27.2306	28.4853	54.7484	34.8326	36.2195	40.8485	39.3533	38.9643	36.9552	41.6396	0	0		0.0759935	0.12789	-0.0316711	0.0849898	0.194805	0.0628291
30.7	1.07475	43.2444	27.867	27.3197	26.7506	26.9232	24.6564	27.7282	25.1013	27.2306	28.4853	54.7273	34.8191	36.2055	40.8328	39.3381	38.9492	36.9409	41.6236	0	0		0.0758018	0.1277	-0.0318636	0.0847985	0.19462	0.0626371
30.8	1.05372	43.2444	27.867	27.3197	26.7506	26.9232	24.6564	27.7282	25.1013	27.2306	28.4853	54.7062	34.8057	36.1916	40.8171	39.323	38.9343	36.9267	41.6076	0	0		0.0756106	0.127511	-0.0320558	0.0846075	0.194435	0.0624455
30.9	1.03322	43.2444	27.867	27.3197	26.7506	26.9232	24.6564	27.7282	25.1013	27.2306	28.4853	54.6852	34.7924	36.1777	40.8014	39.3079	38.9193	36.9125	41.5916	0	0		0.0754197	0.127322	-0.0322476	0.0844169	0.19425	0.0622543
31	1.01327	43.2444	27.867	27.3197	26.7506	26.9232	24.6564	27.7282	25.1013	27.2306	28.4853	54.6643	34.7791	36.1638	40.7858	39.2928	38.9044	36.8984	41.5757	0	0		0.0752292	0.127134	-0.0324389	0.0842267	0.194066	0.0620635
31.1	0.99389	43.2444	27.867	27.3197	26.7506	26.9232	24.6564	27.7282	25.1013	27.2306	28.4853	54.6434	34.7658	36.15	40.7702	39.2778	38.8895	36.8843	41.5598	0	0		0.0750392	0.126946	-0.0326299	0.0840369	0.193882	0.0618731
31.2	0.975082	43.2444	27.867	27.3197	26.7506	26.9232	24.6564	27.7282	25.1013	27.2306	28.4853	54.6226	34.7525	36.1362	40.7547	39.2628	38.8747	36.8702	41.5439	0	0		0.0748495	0.126758	-0.0328204	0.0838475	0.193698	0.0616831
31.3	0.956865	43.2444	27.867	27.3197	26.7506	26.9232	24.6564	27.7282	25.1013	27.2306	28.4853	54.6018	34.7393	36.1225	40.7391	39.2479	38.8599	36.8562	41.5281	0	0		0.0746602	0.126571	-0.0330105	0.0836585	0.193515	0.0614934
31.4	0.939249	43.2444	27.867	27.3197	26.7506	26.9232	24.6564	27.7282	25.1013	27.2306	28.4853	54.581	34.7261	36.1087	40.7237	39.233	38.8451	36.8422	41.5123	0	0		0.0744713	0.126384	-0.0332003	0.0834699	0.193332	0.0613042
31.5	0.922248	43.2444	27.867	27.3197	26.7506	26.9232	24.6564	27.7282	25.1013	27.2306	28.4853	54.5603	34.7129	36.0951	40.7082	39.2181	38.8304	36.8282	41.4966	0	0		0.0742828	0.126197	-0.0333896	0.0832817	0.19315	0.0611154
31.6	0.905871	43.2444	27.867	27.3197	26.7506	26.9232	24.6564	27.7282	25.1013	27.2306	28.4853	54.5397	34.6998	36.0814	40.6928	39.2033	38.8157	36.8143	41.4809	0	0		0.0740948	0.126011	-0.0335785	0.0830938	0.192968	0.060927
31.7	0.890129	43.2444	27.867	27.3197	26.7506	26.9232	24.6564	27.7282	25.1013	27.2306	28.4853	54.5191	34.6867	36.0678	40.6775	39.1885	38.8011	36.8004	41.4653	0	0		0.0739071	0.125825	-0.033767	0.0829064	0.192786	0.0607389
31.8	0.875031	43.2444	27.867	27.3197	26.7506	26.9232	24.6564	27.7282	25.1013	27.2306	28.4853	54.4986	34.6736	36.0542	40.6622	39.1737	38.7865	36.7866	41.4496	0	0		0.0737198	0.12564	-0.0339551	0.0827194	0.192605	0.0605513
31.9	0.860585	43.2444	27.867	27.3197	26.7506	26.9232	24.6564	27.7282	25.1013	27.2306	28.4853	54.4781	34.6606	36.0407	40.6469	39.159	38.7719	36.7727	41.4341	0	0		0.0735328	0.125455	-0.0341429	0.0825327	0.192424	0.0603641
32	0.846801	43.2444	27.867	27.3197	26.7506	26.9232	24.6564	27.7282	25.1013	27.2306	28.4853	54.4577	34.6476	36.0271	40.6316	39.1443	38.7574	36.7589	41.4185	0	0		0.0733463	0.12527	-0.0343302	0.0823465	0.192243	0.0601772
32.1	0.833684	43.2444	27.867	27.3197	26.7506	26.9232	24.6564	27.7282	25.1013	27.2306	28.4853	54.4373	34.6346	36.0137	40.6164	39.1296	38.7429	36.7452	41.403	0	0		0.0731602	0.125086	-0.0345171	0.0821606	0.192063	0.0599907
32.2	0.821245	43.2444	27.867	27.3197	26.7506	26.9232	24.6564	27.7282	25.1013	27.2306	28.4853	54.417	34.6217	36.0002	40.6013	39.115	38.7284	36.7315	41.3876	0	0		0.0729744	0.124902	-0.0347036	0.0819751	0.191883	0.0598047
32.3	0.809489	43.2444	27.867	27.3197	26.7506	26.9232	24.6564	27.7282	25.1013	27.2306	28.4853	54.3967	34.6088	35.9868	40.5861	39.1005	38.714	36.7178	41.3721	0	0		0.0727891	0.124719	-0.0348897	0.08179	0.191704	0.059619
32.4	0.798423	43.2444	27.867	27.3197	26.7506	26.9232	24.6564	27.7282	25.1013	27.2306	28.4853	54.3765	34.5959	35.9734	40.5711	39.0859	38.6996	36.7041	41.3568	0	0		0.0726041	0.124536	-0.0350754	0.0816053	0.191524	0.0594337
32.5	0.788055	43.2444	27.867	27.3197	26.7506	26.9232	24.6564	27.7282	25.1013	27.2306	28.4853	54.3563	34.5831	35.9601	40.556	39.0714	38.6852	36.6905	41.3414	0	0		0.0724196	0.124353	-0.0352608	0.081421	0.191346	0.0592488
32.6	0.77839	43.2444	27.867	27.3197	26.7506	26.9232	24.6564	27.7282	25.1013	27.2306	28.4853	54.3362	34.5703	35.9468	40.541	39.057	38.6709	36.6769	41.3261	0	0		0.0722354	0.124171	-0.0354457	0.0812371	0.191167	0.0590643
32.7	0.769435	43.2444	27.867	27.3197	26.7506	26.9232	24.6564	27.7282	25.1013	27.2306	28.4853	54.3161	34.5575	35.9335	40.526	39.0425	38.6566	36.6634	41.3108	0	0		0.0720516	0.123989	-0.0356302	0.0810535	0.190989	0.0588802
32.8	0.761195	43.2444	27.867	27.3197	26.7506	26.9232	24.6564	27.7282	25.1013	27.2306	28.4853	54.2961	34.5448	35.9202	40.5111	39.0281	38.6424	36.6499	41.2956	0	0		0.0718682	0.123807	-0.0358143	0.0808704	0.190812	0.0586965
32.9	0.753675	43.2444	27.867	27.3197	26.7506	26.9232	24.6564	27.7282	25.1013	27.2306	28.4853	54.2761	34.5321	35.907	40.4962	39.0138	38.6281	36.6364	41.2804	0	0		0.0716851	0.123626	-0.0359981	0.0806876	0.190634	0.0585131
33	0.746882	43.2444	27.867	27.3197	26.7506	26.9232	24.6564	27.7282	25.1013	27.2306	28.4853	54.2562	34.5194	35.8938	40.4813	38.9995	38.614	36.6229	41.2653	0	0		0.0715025	0.123446	-0.0361814	0.0805052	0.190457	0.0583302
33.1	0.74082	43.2444	27.867	27.3197	26.7506	26.9232	24.6564	27.7282	25.1013	27.2306	28.4853	54.2363	34.5068	35.8807	40.4665	38.9852	38.5998	36.6095	41.2501	0	0		0.0713202	0.123265	-0.0363644	0.0803232	0.190281	0.0581476
33.2	0.735494	43.2444	27.867	27.3197	26.7506	26.9232	24.6564	27.7282	25.1013	27.2306	28.4853	54.2165	34.4941	35.8676	40.4517	38.9709	38.5857	36.5961	41.2351	0	0		0.0711384	0.123085	-0.0365469	0.0801416	0.190105	0.0579654
33.3	0.730908	43.2444	27.867	27.3197	26.7506	26.9232	24.6564	27.7282	25.1013	27.2306	28.4853	54.1967	34.4816	35.8545	40.4369	38.9567	38.5716	36.5828	41.22	0	0		0.0709569	0.122905	-0.0367291	0.0799603	0.189929	0.0577836
33.4	0.727067	43.2444	27.867	27.3197	26.7506	26.9232	24.6564	27.7282	25.1013	27.2306	28.4853	54.177	34.469	35.8414	40.4222	38.9425	38.5576	36.5695	41.205	0	0		0.0707758	0.122726	-0.0369109	0.0797795	0.189753	0.0576022
33.5	0.723974	43.2444	27.867	27.3197	26.7506	26.9232	24.6564	27.7282	25.1013	27.2306	28.4853	54.1573	34.4565	35.8284	40.4075	38.9284	38.5436	36.5562	41.1901	0	0		0.070595	0.122547	-0.0370922	0.079599	0.189578	0.0574212
33.6	0.72163	43.2444	27.867	27.3197	26.7506	26.9232	24.6564	27.7282	25.1013	27.2306	28.4853	54.1377	34.444	35.8154	40.3929	38.9143	38.5296	36.5429	41.1751	0	0		0.0704147	0.122369	-0.0372732	0.0794189	0.189404	0.0572405
33.7	0.720039	43.2444	27.867	27.3197	26.7506	26.9232	24.6564	27.7282	25.1013	27.2306	28.4853	54.1181	34.4315	35.8025	40.3783	38.9002	38.5157	36.5297	41.1602	0	0		0.0702347	0.122191	-0.0374538	0.0792392	0.189229	0.0570602
33.8	0.7192	43.2444	27.867	27.3197	26.7506	26.9232	24.6564	27.7282	25.1013	27.2306	28.4853	54.0986	34.4191	35.7896	40.3637	38.8862	38.5018	36.5165	41.1454	0	0		0.0700552	0.122013	-0.0376341	0.0790598	0.189055	0.0568804
33.9	0.719113	43.2444	27.867	27.3197	26.7506	26.9232	24.6564	27.7282	25.1013	27.2306	28.4853	54.0791	34.4067	35.7767	40.3492	38.8722	38.4879	36.5034	41.1306	0	0		0.0698759	0.121835	-0.0378139	0.0788809	0.188881	0.0567009
34	0.719777	43.2444	27.867	27.3197	26.7506	26.9232	24.6564	27.7282	25.1013	27.2306	28.4853	54.0597	34.3944	35.7638	40.3347	38.8582	38.4741	36.4903	41.1158	0	0		0.0696971	0.121658	-0.0379933	0.0787023	0.188708	0.0565217
34.1	0.721189	43.2444	27.867	27.3197	26.7506	26.9232	24.6564	27.7282	25.1013	27.2306	28.4853	54.0403	34.382	35.751	40.3202	38.8443	38.4603	36.4772	41.101	0	0		0.0695187	0.121482	-0.0381724	0.0785241	0.188535	0.056343
34.2	0.723347	43.2444	27.867	27.3197	26.7506	26.9232	24.6564	27.7282	25.1013	27.2306	28.4853	54.0209	34.3697	35.7382	40.3058	38.8304	38.4465	36.4641	41.0863	0	0		0.0693406	0.121305	-0.0383511	0.0783462	0.188363	0.0561646
34.3	0.726244	43.2444	27.867	27.3197	26.7506	26.9232	24.6564	27.7282	25.1013	27.2306	28.4853	54.0016	34.3575	35.7254	40.2914	38.8165	38.4328	36.4511	41.0717	0	0		0.0691629	0.121129	-0.0385294	0.0781688	0.18819	0.0559866
34.4	0.729875	43.2444	27.867	27.3197	26.7506	26.9232	24.6564	27.7282	25.1013	27.2306	28.4853	53.9824	34.3452	35.7127	40.277	38.8027	38.4191	36.4381	41.057	0	0		0.0689856	0.120954	-0.0387073	0.0779917	0.188019	0.055809
34.5	0.734234	43.2444	27.867	27.3197	26.7506	26.9232	24.6564	27.7282	25.1013	27.2306	28.4853	53.9632	34.333	35.7	40.2627	38.7889	38.4055	36.4252	41.0424	0	0		0.0688086	0.120779	-0.0388848	0.077815	0.187847	0.0556318
34.6	0.739312	43.2444	27.867	27.3197	26.7506	26.9232	24.6564	27.7282	25.1013	27.2306	28.4853	53.9441	34.3208	35.6873	40.2484	38.7751	38.3918	36.4122	41.0279	0	0		0.0686321	0.120604	-0.0390619	0.0776387	0.187676	0.0554549
34.7	0.745101	43.2444	27.867	27.3197	26.7506	26.9232	24.6564	27.7282	25.1013	27.2306	28.4853	53.925	34.3087	35.6747	40.2342	38.7614	38.3782	36.3994	41.0134	0	0		0.0684559	0.120429	-0.0392387	0.0774627	0.187505	0.0552784
34.8	0.751591	43.2444	27.867	27.3197	26.7506	26.9232	24.6564	27.7282	25.1013	27.2306	28.4853	53.9059	34.2966	35.6621	40.22	38.7477	38.3647	36.3865	40.9989	0	0		0.0682801	0.120255	-0.039415	0.0772871	0.187335	0.0551023
34.9	0.758772	43.2444	27.867	27.3197	26.7506	26.9232	24.6564	27.7282	25.1013	27.2306	28.4853	53.8869	34.2845	35.6495	40.2058	38.734	38.3512	36.3737	40.9844	0	0		0.0681046	0.120082	-0.039591	0.0771119	0.187165	0.0549266
35	0.766633	43.2444	27.867	27.3197	26.7506	26.9232	24.6564	27.7282	25.1013	27.2306	28.4853	53.868	34.2724	35.637	40.1916	38.7204	38.3377	36.3609	40.97	0	0		0.0679295	0.119908	-0.0397666	0.0769371	0.186995	0.0547512
35.1	0.775165	43.2444	27.867	27.3197	26.7506	26.9232	24.6564	27.7282	25.1013	27.2306	28.4853	53.8491	34.2604	35.6245	40.1775	38.7068	38.3242	36.3481	40.9556	0	0		0.0677548	0.119735	-0.0399419	0.0767626	0.186826	0.0545763
35.2	0.784357	43.2444	27.867	27.3197	26.7506	26.9232	24.6564	27.7282	25.1013	27.2306	28.4853	53.8302	34.2484	35.612	40.1635	38.6933	38.3108	36.3354	40.9413	0	0		0.0675805	0.119563	-0.0401167	0.0765885	0.186656	0.0544016
35.3	0.794196	43.2444	27.867	27.3197	26.7506	26.9232	24.6564	27.7282	25.1013	27.2306	28.4853	53.8114	34.2364	35.5996	40.1494	38.6797	38.2974	36.3227	40.927	0	0		0.0674065	0.11939	-0.0402912	0.0764147	0.186488	0.0542274
35.4	0.804673	43.2444	27.867	27.3197	26.7506	26.9232	24.6564	27.7282	25.1013	27.2306	28.4853	53.7926	34.2245	35.5872	40.1354	38.6663	38.2841	36.31	40.9127	0	0		0.067233	0.119218	-0.0404653	0.0762414	0.186319	0.0540535
35.5	0.815775	43.2444	27.867	27.3197	26.7506	26.9232	24.6564	27.7282	25.1013	27.2306	28.4853	53.7739	34.2126	35.5748	40.1215	38.6528	38.2707	36.2974	40.8985	0	0		0.0670597	0.119047	-0.040639	0.0760684	0.186152	0.05388
35.6	0.827492	43.2444	27.867	27.3197	26.7506	26.9232	24.6564	27.7282	25.1013	27.2306	28.4853	53.7552	34.2007	35.5624	40.1075	38.6394	38.2574	36.2848	40.8843	0	0		0.0668869	0.118876	-0.0408124	0.0758957	0.185984	0.0537069
35.7	0.839809	43.2444	27.867	27.3197	26.7506	26.9232	24.6564	27.7282	25.1013	27.2306	28.4853	53.7366	34.1888	35.5501	40.0936	38.626	38.2442	36.2722	40.8701	0	0		0.0667144	0.118705	-0.0409853	0.0757235	0.185817	0.0535341
35.8	0.852715	43.2444	27.867	27.3197	26.7506	26.9232	24.6564	27.7282	25.1013	27.2306	28.4853	53.718	34.177	35.5378	40.0798	38.6126	38.231	36.2597	40.856	0	0		0.0665423	0.118534	-0.0411579	0.0755516	0.18565	0.0533617
35.9	0.866196	43.2444	27.867	27.3197	26.7506	26.9232	24.6564	27.7282	25.1013	27.2306	28.4853	53.6995	34.1652	35.5256	40.066	38.5993	38.2178	36.2472	40.8419	0	0		0.0663705	0.118364	-0.0413302	0.0753801	0.185483	0.0531897
36	0.880239	43.2444	27.867	27.3197	26.7506	26.9232	24.6564	27.7282	25.1013	27.2306	28.4853	53.681	34.1535	35.5133	40.0522	38.586	38.2046	36.2347	40.8278	0	0		0.0661991	0.118195	-0.041502	0.0752089	0.185317	0.0530181
36.1	0.894829	43.2444	27.867	27.3197	26.7506	26.9232	24.6564	27.7282	25.1013	27.2306	28.4853	53.6626	34.1417	35.5011	40.0384	38.5728	38.1915	36.2222	40.8138	0	0		0.0660281	0.118025	-0.0416735	0.0750381	0.185151	0.0528468
36.2	0.909952	43.2444	27.867	27.3197	26.7506	26.9232	24.6564	27.7282	25.1013	27.2306	28.4853	53.6442	34.13	35.489	40.0247	38.5596	38.1784	36.2098	40.7998	0	0		0.0658574	0.117856	-0.0418446	0.0748676	0.184985	0.0526758
36.3	0.925593	43.2444	27.867	27.3197	26.7506	26.9232	24.6564	27.7282	25.1013	27.2306	28.4853	53.6259	34.1184	35.4768	40.011	38.5464	38.1654	36.1974	40.7859	0	0		0.0656872	0.117688	-0.0420153	0.0746976	0.18482	0.0525053
36.4	0.941736	43.2444	27.867	27.3197	26.7506	26.9232	24.6564	27.7282	25.1013	27.2306	28.4853	53.6076	34.1067	35.4647	39.9973	38.5332	38.1523	36.1851	40.7719	0	0		0.0655172	0.117519	-0.0421857	0.0745278	0.184655	0.0523351
36.5	0.958366	43.2444	27.867	27.3197	26.7506	26.9232	24.6564	27.7282	25.1013	27.2306	28.4853	53.5893	34.0951	35.4526	39.9837	38.5201	38.1393	36.1728	40.7581	0	0		0.0653477	0.117351	-0.0423557	0.0743585	0.184491	0.0521652
36.6	0.975466	43.2444	27.867	27.3197	26.7506	26.9232	24.6564	27.7282	25.1013	27.2306	28.4853	53.5711	34.0835	35.4406	39.9701	38.507	38.1264	36.1605	40.7442	0	0		0.0651784	0.117184	-0.0425253	0.0741895	0.184327	0.0519958
36.7	0.993018	43.2444	27.867	27.3197	26.7506	26.9232	24.6564	27.7282	25.1013	27.2306	28.4853	53.5529	34.072	35.4286	39.9566	38.4939	38.1134	36.1482	40.7304	0	0		0.0650096	0.117017	-0.0426946	0.0740209	0.184163	0.0518267
36.8	1.011	43.2444	27.867	27.3197	26.7506	26.9232	24.6564	27.7282	25.1013	27.2306	28.4853	53.5348	34.0604	35.4166	39.9431	38.4809	38.1006	36.136	40.7166	0	0		0.0648411	0.11685	-0.0428634	0.0738526	0.184	0.0516579
36.9	1.02941	43.2444	27.867	27.3197	26.7506	26.9232	24.6564	27.7282	25.1013	27.2306	28.4853	53.5167	34.0489	35.4046	39.9296	38.4679	38.0877	36.1238	40.7029	0	0		0.064673	0.116683	-0.043032	0.0736847	0.183836	0.0514895
37	1.04821	43.2444	27.867	27.3197	26.7506	26.9232	24.6564	27.7282	25.1013	27.2306	28.4853	53.4987	34.0375	35.3927	39.9161	38.455	38.0749	36.1116	40.6892	0	0		0.0645052	0.116517	-0.0432001	0.0735171	0.183674	0.0513215
37.1	1.06738	43.2444	27.867	27.3197	26.7506	26.9232	24.6564	27.7282	25.1013	27.2306	28.4853	53.4807	34.026	35.3808	39.9027	38.442	38.0621	36.0995	40.6755	0	0		0.0643378	0.116351	-0.0433679	0.0733499	0.183511	0.0511539
37.2	1.08692	43.2444	27.867	27.3197	26.7506	26.9232	24.6564	27.7282	25.1013	27.2306	28.4853	53.4628	34.0146	35.3689	39.8893	38.4292	38.0493	36.0874	40.6618	0	0		0.0641708	0.116186	-0.0435353	0.0731831	0.183349	0.0509866
37.3	1.10678	43.2444	27.867	27.3197	26.7506	26.9232	24.6564	27.7282	25.1013	27.2306	28.4853	53.4449	34.0032	35.3571	39.876	38.4163	38.0366	36.0753	40.6482	0	0		0.0640041	0.116021	-0.0437024	0.0730166	0.183187	0.0508196
37.4	1.12696	43.2444	27.867	27.3197	26.7506	26.9232	24.6564	27.7282	25.1013	27.2306	28.4853	53.427	33.9919	35.3453	39.8627	38.4035	38.0239	36.0632	40.6346	0	0		0.0638378	0.115856	-0.0438691	0.0728505	0.183026	0.050653
37.5	1.14742	43.2444	27.867	27.3197	26.7506	26.9232	24.6564	27.7282	25.1013	27.2306	28.4853	53.4092	33.9805	35.3335	39.8494	38.3907	38.0112	36.0512	40.6211	0	0		0.0636718	0.115691	-0.0440354	0.0726847	0.182865	0.0504868
37.6	1.16815	43.2444	27.867	27.3197	26.7506	26.9232	24.6564	27.7282	25.1013	27.2306	28.4853	53.3915	33.9692	35.3218	39.8361	38.3779	37.9985	36.0392	40.6076	0	0		0.0635062	0.115527	-0.0442014	0.0725193	0.182704	0.0503209
37.7	1.18912	43.2444	27.867	27.3197	26.7506	26.9232	24.6564	27.7282	25.1013	27.2306	28.4853	53.3738	33.958	35.31	39.8229	38.3652	37.9859	36.0273	40.5941	0	0		0.0633409	0.115364	-0.044367	0.0723542	0.182544	0.0501554
37.8	1.2103	43.2444	27.867	27.3197	26.7506	26.9232	24.6564	27.7282	25.1013	27.2306	28.4853	53.3561	33.9467	35.2984	39.8097	38.3525	37.9734	36.0154	40.5807	0	0		0.063176	0.1152	-0.0445322	0.0721895	0.182384	0.0499903
37.9	1.23167	43.2444	27.867	27.3197	26.7506	26.9232	24.6564	27.7282	25.1013	27.2306	28.4853	53.3385	33.9355	35.2867	39.7966	38.3398	37.9608	36.0035	40.5673	0	0		0.0630114	0.115037	-0.0446971	0.0720252	0.182224	0.0498255
38	1.25321	43.2444	27.867	27.3197	26.7506	26.9232	24.6564	27.7282	25.1013	27.2306	28.4853	53.3209	33.9243	35.2751	39.7834	38.3271	37.9483	35.9916	40.5539	0	0		0.0628472	0.114874	-0.0448616	0.0718612	0.182065	0.049661
38.1	1.27489	43.2444	27.867	27.3197	26.7506	26.9232	24.6564	27.7282	25.1013	27.2306	28.4853	53.3033	33.9132	35.2635	39.7704	38.3145	37.9358	35.9797	40.5406	0	0		0.0626834	0.114712	-0.0450258	0.0716975	0.181905	0.0494969
38.2	1.29669	43.2444	27.867	27.3197	26.7506	26.9232	24.6564	27.7282	25.1013	27.2306	28.4853	53.2858	33.902	35.2519	39.7573	38.302	37.9234	35.9679	40.5273	0	0		0.0625199	0.11455	-0.0451896	0.0715342	0.181747	0.0493332
38.3	1.31858	43.2444	27.867	27.3197	26.7506	26.9232	24.6564	27.7282	25.1013	27.2306	28.4853	53.2684	33.8909	35.2403	39.7443	38.2894	37.9109	35.9562	40.514	0	0		0.0623567	0.114388	-0.0453531	0.0713713	0.181588	0.0491698
38.4	1.34055	43.2444	27.867	27.3197	26.7506	26.9232	24.6564	27.7282	25.1013	27.2306	28.4853	53.251	33.8799	35.2288	39.7313	38.2769	37.8986	35.9444	40.5007	0	0		0.0621939	0.114227	-0.0455162	0.0712087	0.18143	0.0490068
38.5	1.36257	43.2444	27.867	27.3197	26.7506	26.9232	24.6564	27.7282	25.1013	27.2306	28.4853	53.2336	33.8688	35.2173	39.7183	38.2644	37.8862	35.9327	40.4875	0	0		0.0620315	0.114066	-0.0456789	0.0710464	0.181273	0.0488441
38.6	1.38461	43.2444	27.867	27.3197	26.7506	26.9232	24.6564	27.7282	25.1013	27.2306	28.4853	53.2163	33.8578	35.2059	39.7054	38.252	37.8739	35.921	40.4744	0	0		0.0618694	0.113906	-0.0458413	0.0708845	0.181115	0.0486817
38.7	1.40665	43.2444	27.867	27.3197	26.7506	26.9232	24.6564	27.7282	25.1013	27.2306	28.4853	53.199	33.8468	35.1944	39.6925	38.2396	37.8616	35.9093	40.4612	0	0		0.0617076	0.113745	-0.0460033	0.070723	0.180958	0.0485198
38.8	1.42866	43.2444	27.867	27.3197	26.7506	26.9232	24.6564	27.7282	25.1013	27.2306	28.4853	53.1818	33.8358	35.183	39.6797	38.2272	37.8493	35.8977	40.4481	0	0		0.0615462	0.113585	-0.046165	0.0705618	0.180802	0.0483581
38.9	1.45062	43.2444	27.867	27.3197	26.7506	26.9232	24.6564	27.7282	25.1013	27.2306	28.4853	53.1646	33.8249	35.1717	39.6668	38.2148	37.8371	35.8861	40.435	0	0		0.0613852	0.113426	-0.0463263	0.0704009	0.180645	0.0481968
39	1.47252	43.2444	27.867	27.3197	26.7506	26.9232	24.6564	27.7282	25.1013	27.2306	28.4853	53.1474	33.814	35.1603	39.654	38.2025	37.8249	35.8745	40.422	0	0		0.0612245	0.113267	-0.0464872	0.0702404	0.180489	0.0480359
39.1	1.49431	43.2444	27.867	27.3197	26.7506	26.9232	24.6564	27.7282	25.1013	27.2306	28.4853	53.1303	33.8031	35.149	39.6413	38.1902	37.8127	35.863	40.409	0	0		0.0610641	0.113108	-0.0466479	0.0700802	0.180333	0.0478753
39.2	1.51599	43.2444	27.867	27.3197	26.7506	26.9232	24.6564	27.7282	25.1013	27.2306	28.4853	53.1133	33.7922	35.1377	39.6285	38.1779	37.8005	35.8515	40.396	0	0		0.0609041	0.112949	-0.0468081	0.0699204	0.180178	0.0477151
39.3	1.53752	43.2444	27.867	27.3197	26.7506	26.9232	24.6564	27.7282	25.1013	27.2306	28.4853	53.0962	33.7814	35.1265	39.6158	38.1657	37.7884	35.84	40.3831	0	0		0.0607445	0.112791	-0.046968	0.0697609	0.180023	0.0475552
39.4	1.55889	43.2444	27.867	27.3197	26.7506	26.9232	24.6564	27.7282	25.1013	27.2306	28.4853	53.0793	33.7706	35.1152	39.6032	38.1535	37.7763	35.8285	40.3701	0	0		0.0605851	0.112633	-0.0471276	0.0696018	0.179868	0.0473956
39.5	1.58006	43.2444	27.867	27.3197	26.7506	26.9232	24.6564	27.7282	25.1013	27.2306	28.4853	53.0623	33.7598	35.104	39.5905	38.1413	37.7643	35.8171	40.3573	0	0		0.0604262	0.112476	-0.0472868	0.069443	0.179714	0.0472364
39.6	1.60103	43.2444	27.867	27.3197	26.7506	26.9232	24.6564	27.7282	25.1013	27.2306	28.4853	53.0454	33.7491	35.0928	39.5779	38.1292	37.7523	35.8057	40.3444	0	0		0.0602675	0.112318	-0.0474456	0.0692845	0.17956	0.0470775
39.7	1.62176	43.2444	27.867	27.3197	26.7506	26.9232	24.6564	27.7282	25.1013	27.2306	28.4853	53.0286	33.7384	35.0817	39.5654	38.1171	37.7403	35.7943	40.3316	0	0		0.0601092	0.112161	-0.0476042	0.0691264	0.179406	0.046919
39.8	1.64224	43.2444	27.867	27.3197	26.7506	26.9232	24.6564	27.7282	25.1013	27.2306	28.4853	53.0118	33.7277	35.0706	39.5528	38.105	37.7283	35.7829	40.3188	0	0		0.0599513	0.112005	-0.0477623	0.0689687	0.179253	0.0467609
39.9	1.66245	43.2444	27.867	27.3197	26.7506	26.9232	24.6564	27.7282	25.1013	27.2306	28.4853	52.995	33.717	35.0595	39.5403	38.0929	37.7164	35.7716	40.3061	0	0		0.0597937	0.111849	-0.0479201	0.0688112	0.179099	0.046603
40	1.68237	43.2444	27.867	27.3197	26.7506	26.9232	24.6564	27.7282	25.1013	27.2306	28.4853	52.9783	33.7064	35.0484	39.5278	38.0809	37.7045	35.7603	40.2933	0	0		0.0596364	0.111693	-0.0480776	0.0686542	0.178947	0.0464455
40.1	1.70198	43.2444	27.867	27.3197	26.7506	26.9232	24.6564	27.7282	25.1013	27.2306	28.4853	52.9616	33.6957	35.0374	39.5154	38.0689	37.6926	35.7491	40.2806	0	0		0.0594795	0.111537	-0.0482347	0.0684974	0.178794	0.0462884
40.2	1.72127	43.2444	27.867	27.3197	26.7506	26.9232	24.6564	27.7282	25.1013	27.2306	28.4853	52.945	33.6852	35.0264	39.503	38.0569	37.6808	35.7378	40.268	0	0		0.0593229	0.111382	-0.0483915	0.068341	0.178642	0.0461316
40.3	1.74023	43.2444	27.867	27.3197	26.7506	26.9232	24.6564	27.7282	25.1013	27.2306	28.4853	52.9284	33.6746	35.0154	39.4906	38.045	37.6689	35.7266	40.2554	0	0		0.0591666	0.111227	-0.0485479	0.0681849	0.17849	0.0459751
40.4	1.75883	43.2444	27.867	27.3197	26.7506	26.9232	24.6564	27.7282	25.1013	27.2306	28.4853	52.9118	33.6641	35.0044	39.4782	38.0331	37.6572	35.7155	40.2428	0	0		0.0590107	0.111073	-0.048704	0.0680292	0.178339	0.045819
40.5	1.77708	43.2444	27.867	27.3197	26.7506	26.9232	24.6564	27.7282	25.1013	27.2306	28.4853	52.8953	33.6535	34.9935	39.4659	38.0212	37.6454	35.7043	40.2302	0	0		0.0588552	0.110919	-0.0488598	0.0678738	0.178188	0.0456632
40.6	1.79495	43.2444	27.867	27.3197	26.7506	26.9232	24.6564	27.7282	25.1013	27.2306	28.4853	52.8788	33.6431	34.9826	39.4536	38.0094	37.6337	35.6932	40.2177	0	0		0.0586999	0.110765	-0.0490152	0.0677188	0.178037	0.0455077
40.7	1.81245	43.2444	27.867	27.3197	26.7506	26.9232	24.6564	27.7282	25.1013	27.2306	28.4853	52.8624	33.6326	34.9717	39.4413	37.9976	37.622	35.6821	40.2052	0	0		0.058545	0.110611	-0.0491702	0.067564	0.177886	0.0453526
40.8	1.82955	43.2444	27.867	27.3197	26.7506	26.9232	24.6564	27.7282	25.1013	27.2306	28.4853	52.846	33.6222	34.9609	39.4291	37.9858	37.6103	35.671	40.1927	0	0		0.0583905	0.110458	-0.0493249	0.0674096	0.177736	0.0451979
40.9	1.84626	43.2444	27.867	27.3197	26.7506	26.9232	24.6564	27.7282	25.1013	27.2306	28.4853	52.8296	33.6118	34.9501	39.4169	37.974	37.5987	35.66	40.1803	0	0		0.0582362	0.110305	-0.0494793	0.0672556	0.177586	0.0450434
41	1.86257	43.2444	27.867	27.3197	26.7506	26.9232	24.6564	27.7282	25.1013	27.2306	28.4853	52.8133	33.6014	34.9393	39.4047	37.9623	37.5871	35.649	40.1679	0	0		0.0580823	0.110153	-0.0496333	0.0671019	0.177437	0.0448893
41.1	1.87846	43.2444	27.867	27.3197	26.7506	26.9232	24.6564	27.7282	25.1013	27.2306	28.4853	52.797	33.591	34.9285	39.3926	37.9506	37.5755	35.638	40.1555	0	0		0.0579288	0.11	-0.049787	0.0669485	0.177287	0.0447356
41.2	1.89394	43.2444	27.867	27.3197	26.7506	26.9232	24.6564	27.7282	25.1013	27.2306	28.4853	52.7808	33.5807	34.9178	39.3805	37.9389	37.5639	35.627	40.1431	0	0		0.0577755	0.109849	-0.0499404	0.0667954	0.177139	0.0445821
41.3	1.909	43.2444	27.867	27.3197	26.7506	26.9232	24.6564	27.7282	25.1013	27.2306	28.4853	52.7646	33.5704	34.9071	39.3684	37.9273	37.5524	35.6161	40.1308	0	0		0.0576227	0.109697	-0.0500934	0.0666427	0.17699	0.044429
41.4	1.92364	43.2444	27.867	27.3197	26.7506	26.9232	24.6564	27.7282	25.1013	27.2306	28.4853	52.7485	33.5601	34.8964	39.3564	37.9157	37.5409	35.6052	40.1185	0	0		0.0574701	0.109546	-0.0502461	0.0664903	0.176842	0.0442763
41.5	1.93785	43.2444	27.867	27.3197	26.7506	26.9232	24.6564	27.7282	25.1013	27.2306	28.4853	52.7323	33.5499	34.8857	39.3443	37.9041	37.5294	35.5943	40.1063	0	0		0.0573179	0.109395	-0.0503984	0.0663383	0.176694	0.0441238
41.6	1.95163	43.2444	27.867	27.3197	26.7506	26.9232	24.6564	27.7282	25.1013	27.2306	28.4853	52.7163	33.5397	34.8751	39.3324	37.8926	37.518	35.5835	40.0941	0	0		0.057166	0.109244	-0.0505505	0.0661865	0.176546	0.0439717
41.7	1.96497	43.2444	27.867	27.3197	26.7506	26.9232	24.6564	27.7282	25.1013	27.2306	28.4853	52.7002	33.5295	34.8645	39.3204	37.881	37.5066	35.5727	40.0819	0	0		0.0570144	0.109094	-0.0507021	0.0660351	0.176399	0.0438199
41.8	1.97788	43.2444	27.867	27.3197	26.7506	26.9232	24.6564	27.7282	25.1013	27.2306	28.4853	52.6843	33.5193	34.8539	39.3085	37.8695	37.4952	35.5619	40.0697	0	0		0.0568632	0.108944	-0.0508535	0.0658841	0.176252	0.0436685
41.9	1.99035	43.2444	27.867	27.3197	26.7506	26.9232	24.6564	27.7282	25.1013	27.2306	28.4853	52.6683	33.5091	34.8434	39.2966	37.8581	37.4839	35.5511	40.0576	0	0		0.0567123	0.108794	-0.0510045	0.0657333	0.176105	0.0435174
42	2.00238	43.2444	27.867	27.3197	26.7506	26.9232	24.6564	27.7282	25.1013	27.2306	28.4853	52.6524	33.499	34.8328	39.2847	37.8466	37.4725	35.5404	40.0455	0	0		0.0565617	0.108645	-0.0511551	0.0655829	0.175959	0.0433666
42.1	2.01397	43.2444	27.867	27.3197	26.7506	26.9232	24.6564	27.7282	25.1013	27.2306	28.4853	52.6365	33.4889	34.8223	39.2728	37.8352	37.4612	35.5297	40.0334	0	0		0.0564114	0.108496	-0.0513055	0.0654328	0.175813	0.0432162
42.2	2.02512	43.2444	27.867	27.3197	26.7506	26.9232	24.6564	27.7282	25.1013	27.2306	28.4853	52.6207	33.4789	34.8119	39.261	37.8239	37.45	35.519	40.0214	0	0		0.0562615	0.108348	-0.0514555	0.0652831	0.175667	0.0430661
42.3	2.03584	43.2444	27.867	27.3197	26.7506	26.9232	24.6564	27.7282	25.1013	27.2306	28.4853	52.6049	33.4688	34.8014	39.2493	37.8125	37.4387	35.5083	40.0094	0	0		0.0561119	0.108199	-0.0516051	0.0651337	0.175521	0.0429163
42.4	2.04611	43.2444	27.867	27.3197	26.7506	26.9232	24.6564	27.7282	25.1013	27.2306	28.4853	52.5892	33.4588	34.791	39.2375	37.8012	37.4275	35.4977	39.9974	0	0		0.0559626	0.108051	-0.0517545	0.0649845	0.175376	0.0427668
42.5	2.05594	43.2444	27.867	27.3197	26.7506	26.9232	24.6564	27.7282	25.1013	27.2306	28.4853	52.5734	33.4488	34.7806	39.2258	37.7899	37.4164	35.4871	39.9854	0	0		0.0558137	0.107904	-0.0519035	0.0648358	0.175231	0.0426177
42.6	2.06533	43.2444	27.867	27.3197	26.7506	26.9232	24.6564	27.7282	25.1013	27.2306	28.4853	52.5578	33.4388	34.7702	39.2141	37.7786	37.4052	35.4765	39.9735	0	0		0.0556651	0.107756	-0.0520522	0.0646873	0.175087	0.0424688
42.7	2.07429	43.2444	27.867	27.3197	26.7506	26.9232	24.6564	27.7282	25.1013	27.2306	28.4853	52.5421	33.4289	34.7599	39.2024	37.7674	37.3941	35.4659	39.9616	0	0		0.0555168	0.107609	-0.0522005	0.0645392	0.174943	0.0423204
42.8	2.08281	43.4808	27.867	27.3197	26.7506	26.9232	24.6564	27.7282	25.1013	27.2306	28.4853	52.5265	33.4189	34.7496	39.1908	37.7562	37.383	35.4554	39.9498	0	0		0.054702	0.107463	-0.0530058	0.0637242	0.174799	0.0417589
42.9	2.0909	43.7489	27.867	27.3197	26.7506	26.9232	24.6564	27.7282	25.1013	27.2306	28.4853	52.511	33.409	34.7393	39.1792	37.745	37.3719	35.4449	39.9379	0	0		0.053799	0.107316	-0.053898	0.0628209	0.174655	0.0411426
43	2.09856	44.1108	27.867	27.3197	26.7506	26.9232	24.6564	27.7282	25.1013	27.2306	28.4853	52.4955	33.3992	34.729	39.1676	37.7338	37.3609	35.4344	39.9261	0	0		0.0526336	0.10717	-0.0550485	0.061655	0.174512	0.0403634
43.1	2.10578	44.6243	27.867	27.3197	26.7506	26.9232	24.6564	27.7282	25.1013	27.2306	28.4853	52.48	33.3893	34.7188	39.1561	37.7227	37.3498	35.424	39.9144	0	0		0.0510457	0.107024	-0.0566149	0.0600663	0.174369	0.0393213
43.2	2.11259	45.3398	27.867	27.3197	26.7506	26.9232	24.6564	27.7282	25.1013	27.2306	28.4853	52.4645	33.3795	34.7085	39.1445	37.7116	37.3389	35.4136	39.9026	0	0		0.0488975	0.106879	-0.0587324	0.057917	0.174226	0.0379299
43.3	2.11897	46.2985	27.867	27.3197	26.7506	26.9232	24.6564	27.7282	25.1013	27.2306	28.4853	52.4491	33.3697	34.6984	39.133	37.7005	37.3279	35.4032	39.8909	0	0		0.0460812	0.106734	-0.0615067	0.055099	0.174084	0.0361204
43.4	2.12493	47.5302	27.867	27.3197	26.7506	26.9232	24.6564	27.7282	25.1013	27.2306	28.4853	52.4338	33.3599	34.6882	39.1216	37.6895	37.317	35.3928	39.8792	0	0		0.0425248	0.106589	-0.0650073	0.0515402	0.173942	0.0338456
43.5	2.13047	49.052	27.867	27.3197	26.7506	26.9232	24.6564	27.7282	25.1013	27.2306	28.4853	52.4185	33.3502	34.6781	39.1101	37.6785	37.3061	35.3825	39.8676	0	0		0.0381963	0.106444	-0.0692642	0.0472085	0.1738	0.0310819
43.6	2.13561	50.8671	27.867	27.3197	26.7506	26.9232	24.6564	27.7282	25.1013	27.2306	28.4853	52.4032	33.3405	34.6679	39.0987	37.6675	37.2952	35.3721	39.8559	0	0		0.0331053	0.1063	-0.0742664	0.0421132	0.173659	0.027831
43.7	2.14035	52.9654	27.867	27.3197	26.7506	26.9232	24.6564	27.7282	25.1013	27.2306	28.4853	52.3879	33.3308	34.6579	39.0874	37.6565	37.2843	35.3618	39.8443	0	0		0.0273014	0.106156	-0.0799629	0.0363041	0.173518	0.0241192
43.8	2.14469	55.3233	27.867	27.3197	26.7506	26.9232	24.6564	27.7282	25.1013	27.2306	28.4853	52.3727	33.3211	34.6478	39.076	37.6456	37.2735	35.3516	39.8328	0	0		0.0208711	0.106013	-0.0862668	0.0298673	0.173377	0.0199959
43.9	2.14865	57.9051	27.867	27.3197	26.7506	26.9232	24.6564	27.7282	25.1013	27.2306	28.4853	52.3575	33.3114	34.6378	39.0647	37.6347	37.2627	35.3413	39.8212	0	0		0.0139318	0.10587	-0.0930612	0.0229202	0.173236	0.0155302
44	2.15223	60.6648	27.867	27.3197	26.7506	26.9232	24.6564	27.7282	25.1013	27.2306	28.4853	52.3424	33.3018	34.6277	39.0534	37.6238	37.2519	35.3311	39.8097	0	0		0.00662396	0.105727	-0.100207	0.0156034	0.173096	0.0108075
44.1	2.15544	63.5479	27.867	27.3197	26.7506	26.9232	24.6564	27.7282	25.1013	27.2306	28.4853	52.3273	33.2922	34.6178	39.0421	37.613	37.2412	35.3209	39.7982	0	0		-0.000896492	0.105584	-0.10755	0.00807294	0.172956	0.00592432
44.2	2.1583	66.4942	27.867	27.3197	26.7506	26.9232	24.6564	27.7282	25.1013	27.2306	28.4853	52.3122	33.2826	34.6078	39.0309	37.6021	37.2305	35.3108	39.7868	0	0		-0.00846738	0.105442	-0.114932	0.000491064	0.172817	0.000983286
44.3	2.16082	69.4404	27.867	27.3197	26.7506	26.9232	24.6564	27.7282	25.1013	27.2306	28.4853	52.2972	33.2731	34.5979	39.0197	37.5914	37.2198	35.3006	39.7754	0	0		-0.0159283	0.1053	-0.122197	-0.00698152	0.172677	-0.00391189
44.4	2.16301	72.3235	27.867	27.3197	26.7506	26.9232	24.6564	27.7282	25.1013	27.2306	28.4853	52.2822	33.2635	34.5879	39.0085	37.5806	37.2091	35.2905	39.764	0	0		-0.0231281	0.105158	-0.129198	-0.0141934	0.172538	-0.00866139
44.5	2.16488	75.0832	27.867	27.3197	26.7506	26.9232	24.6564	27.7282	25.1013	27.2306	28.4853	52.2673	33.254	34.5781	38.9974	37.5698	37.1985	35.2804	39.7526	0	0		-0.0299314	0.105017	-0.135805	-0.0210087	0.1724	-0.0131737
44.6	2.16646	77.665	27.867	27.3197	26.7506	26.9232	24.6564	27.7282	25.1013	27.2306	28.4853	52.2524	33.2445	34.5682	38.9862	37.5591	37.1879	35.2704	39.7413	0	0		-0.0362233	0.104876	-0.141909	-0.0273125	0.172261	-0.0173693
44.7	2.16775	80.0229	27.867	27.3197	26.7506	26.9232	24.6564	27.7282	25.1013	27.2306	28.4853	52.2375	33.2351	34.5584	38.9751	37.5484	37.1773	35.2603	39.7299	0	0		-0.0419136	0.104735	-0.147422	-0.0330139	0.172123	-0.0211841
44.8	2.16877	82.1212	27.867	27.3197	26.7506	26.9232	24.6564	27.7282	25.1013	27.2306	28.4853	52.2227	33.2256	34.5485	38.9641	37.5378	37.1667	35.2503	39.7187	0	0		-0.0469391	0.104594	-0.152287	-0.0380497	0.171985	-0.0245711
44.9	2.16953	83.9364	27.867	27.3197	26.7506	26.9232	24.6564	27.7282	25.1013	27.2306	28.4853	52.2079	33.2162	34.5388	38.953	37.5271	37.1562	35.2403	39.7074	0	0		-0.0512652	0.104454	-0.156472	-0.0423849	0.171848	-0.0275025
45	2.17006	85.4581	27.867	27.3197	26.7506	26.9232	24.6564	27.7282	25.1013	27.2306	28.4853	52.1931	33.2068	34.529	38.942	37.5165	37.1457	35.2304	39.6962	0	0		-0.0548861	0.104314	-0.159972	-0.0460137	0.171711	-0.0299703
45.1	2.17037	86.6898	27.867	27.3197	26.7506	26.9232	24.6564	27.7282	25.1013	27.2306	28.4853	52.1784	33.1975	34.5192	38.931	37.5059	37.1352	35.2204	39.685	0	0		-0.0578249	0.104175	-0.162811	-0.0489589	0.171574	-0.0319863
45.2	2.17048	87.6485	27.867	27.3197	26.7506	26.9232	24.6564	27.7282	25.1013	27.2306	28.4853	52.1637	33.1881	34.5095	38.9201	37.4954	37.1248	35.2105	39.6738	0	0		-0.0601316	0.104036	-0.165039	-0.0512707	0.171437	-0.0335814
45.3	2.1704	88.364	27.867	27.3197	26.7506	26.9232	24.6564	27.7282	25.1013	27.2306	28.4853	52.1491	33.1788	34.4998	38.9091	37.4849	37.1143	35.2006	39.6627	0	0		-0.0618819	0.103897	-0.166729	-0.0530249	0.171301	-0.0348043
45.4	2.17014	88.8775	27.867	27.3197	26.7506	26.9232	24.6564	27.7282	25.1013	27.2306	28.4853	52.1345	33.1695	34.4902	38.8982	37.4743	37.1039	35.1908	39.6516	0	0		-0.0631737	0.103758	-0.167976	-0.0543195	0.171165	-0.0357196
45.5	2.16974	89.2394	27.867	27.3197	26.7506	26.9232	24.6564	27.7282	25.1013	27.2306	28.4853	52.1199	33.1602	34.4805	38.8874	37.4639	37.0936	35.1809	39.6405	0	0		-0.0641234	0.10362	-0.168894	-0.0552713	0.171029	-0.0364051
45.6	2.16919	89.5075	27.867	27.3197	26.7506	26.9232	24.6564	27.7282	25.1013	27.2306	28.4853	52.1053	33.151	34.4709	38.8765	37.4534	37.0832	35.1711	39.6294	0	0		-0.0648618	0.103482	-0.169607	-0.0560113	0.170894	-0.0369483
45.7	2.16853	89.7439	27.867	27.3197	26.7506	26.9232	24.6564	27.7282	25.1013	27.2306	28.4853	52.0908	33.1417	34.4613	38.8657	37.443	37.0729	35.1613	39.6184	0	0		-0.0655282	0.103344	-0.170251	-0.0566791	0.170758	-0.0374431
45.8	2.16776	89.7439	27.867	27.3197	26.7506	26.9232	24.6564	27.7282	25.1013	27.2306	28.4853	52.0764	33.1325	34.4517	38.8549	37.4326	37.0626	35.1515	39.6074	0	0		-0.0656665	0.103207	-0.170386	-0.0568175	0.170624	-0.0375818
45.9	2.1669	89.7439	27.867	27.3197	26.7506	26.9232	24.6564	27.7282	25.1013	27.2306	28.4853	52.0619	33.1233	34.4422	38.8441	37.4222	37.0523	35.1418	39.5964	0	0		-0.0658045	0.10307	-0.170521	-0.0569557	0.170489	-0.0377202
46	2.16597	89.7439	27.867	27.3197	26.7506	26.9232	24.6564	27.7282	25.1013	27.2306	28.4853	52.0475	33.1142	34.4327	38.8334	37.4119	37.0421	35.1321	39.5854	0	0		-0.0659421	0.102933	-0.170655	-0.0570935	0.170355	-0.0378583
46.1	2.16498	89.7439	27.867	27.3197	26.7506	26.9232	24.6564	27.7282	25.1013	27.2306	28.4853	52.0332	33.1051	34.4232	38.8227	37.4015	37.0318	35.1224	39.5745	0	0		-0.0660795	0.102796	-0.170789	-0.057231	0.170221	-0.037996
46.2	2.16393	89.7439	27.867	27.3197	26.7506	26.9232	24.6564	27.7282	25.1013	27.2306	28.4853	52.0188	33.0959	34.4137	38.812	37.3913	37.0217	35.1127	39.5636	0	0		-0.0662166	0.10266	-0.170923	-0.0573682	0.170087	-0.0381335
46.3	2.16285	89.7439	27.867	27.3197	26.7506	26.9232	24.6564	27.7282	25.1013	27.2306	28.4853	52.0046	33.0868	34.4042	38.8013	37.381	37.0115	35.1031	39.5528	0	0		-0.0663533	0.102524	-0.171056	-0.0575051	0.169954	-0.0382707
46.4	2.16175	89.7439	27.867	27.3197	26.7506	26.9232	24.6564	27.7282	25.1013	27.2306	28.4853	51.9903	33.0778	34.3948	38.7907	37.3707	37.0013	35.0935	39.5419	0	0		-0.0664898	0.102388	-0.171189	-0.0576417	0.169821	-0.0384075
46.5	2.16063	89.7439	27.867	27.3197	26.7506	26.9232	24.6564	27.7282	25.1013	27.2306	28.4853	51.9761	33.0687	34.3854	38.7801	37.3605	36.9912	35.0839	39.5311	0	0		-0.0666259	0.102253	-0.171322	-0.057778	0.169688	-0.0385441
46.6	2.1595	89.7439	27.867	27.3197	26.7506	26.9232	24.6564	27.7282	25.1013	27.2306	28.4853	51.9619	33.0597	34.376	38.7695	37.3503	36.9811	35.0743	39.5203	0	0		-0.0667617	0.102118	-0.171454	-0.057914	0.169555	-0.0386803
46.7	2.15838	89.7439	27.867	27.3197	26.7506	26.9232	24.6564	27.7282	25.1013	27.2306	28.4853	52.4292	33.0507	34.3667	38.759	37.3402	36.9711	35.0647	39.5096	0	0		-0.0656703	0.103187	-0.170124	-0.0568414	0.170436	-0.0380339
46.8	2.15726	89.7439	27.867	27.3197	26.7506	26.9232	24.6564	27.7282	25.1013	27.2306	28.4853	52.961	33.0417	34.3573	38.7484	37.33	36.961	35.0552	39.4988	0	0		-0.064417	0.104415	-0.168601	-0.0556094	0.17145	-0.0372834
46.9	2.15617	89.7439	27.867	27.3197	26.7506	26.9232	24.6564	27.7282	25.1013	27.2306	28.4853	53.6836	33.0328	34.348	38.7379	37.3199	36.951	35.0457	39.4881	0	0		-0.0626834	0.106112	-0.166507	-0.0539042	0.172861	-0.036225
47	2.15509	89.7439	27.867	27.3197	26.7506	26.9232	24.6564	27.7282	25.1013	27.2306	28.4853	54.7142	33.0238	34.3387	38.7274	37.3098	36.941	35.0362	39.4774	0	0		-0.0601785	0.108564	-0.163495	-0.0514394	0.174909	-0.0346713
47.1	2.15405	89.7439	27.867	27.3197	26.7506	26.9232	24.6564	27.7282	25.1013	27.2306	28.4853	56.1555	33.0149	34.3295	38.717	37.2997	36.931	35.0268	39.4668	0	0		-0.0566563	0.11201	-0.159275	-0.0479726	0.177795	-0.0324619
47.2	2.15305	89.7439	27.867	27.3197	26.7506	26.9232	24.6564	27.7282	25.1013	27.2306	28.4853	58.0909	33.006	34.3202	38.7066	37.2897	36.9211	35.0174	39.4562	0	0		-0.0519303	0.116628	-0.153626	-0.0433199	0.181673	-0.0294719
47.3	2.15209	89.7439	27.867	27.3197	26.7506	26.9232	24.6564	27.7282	25.1013	27.2306	28.4853	60.5805	32.9972	34.311	38.6962	37.2797	36.9112	35.0079	39.4456	0	0		-0.0458856	0.122525	-0.146416	-0.0373677	0.186636	-0.0256197
47.4	2.15118	89.7439	27.867	27.3197	26.7506	26.9232	24.6564	27.7282	25.1013	27.2306	28.4853	63.6584	32.9883	34.3018	38.6858	37.2697	36.9013	34.9986	39.435	0	0		-0.0384855	0.129729	-0.137606	-0.0300799	0.192712	-0.0208711
47.5	2.15033	89.7439	27.867	27.3197	26.7506	26.9232	24.6564	27.7282	25.1013	27.2306	28.4853	67.3312	32.9795	34.2926	38.6755	37.2597	36.8914	34.9892	39.4245	0	0		-0.0297734	0.138191	-0.127252	-0.0214985	0.199862	-0.0152413
47.6	2.14954	89.7439	27.867	27.3197	26.7506	26.9232	24.6564	27.7282	25.1013	27.2306	28.4853	71.5775	32.9707	34.2835	38.6651	37.2498	36.8816	34.9799	39.4139	0	0		-0.0198672	0.147784	-0.115502	-0.0117394	0.207988	-0.00879271
47.7	2.14882	89.7439	27.867	27.3197	26.7506	26.9232	24.6564	27.7282	25.1013	27.2306	28.4853	76.349	32.9619	34.2744	38.6548	37.2399	36.8718	34.9706	39.4034	0	0		-0.00894956	0.158324	-0.102578	-0.000982194	0.216935	-0.00163056
47.8	2.14817	89.7439	27.867	27.3197	26.7506	26.9232	24.6564	27.7282	25.1013	27.2306	28.4853	81.5729	32.9532	34.2652	38.6446	37.23	36.862	34.9613	39.393	0	0		0.00274651	0.169576	-0.0887595	0.010544	0.22651	0.00610476
47.9	2.14761	89.7439	27.867	27.3197	26.7506	26.9232	24.6564	27.7282	25.1013	27.2306	28.4853	87.1553	32.9444	34.2562	38.6343	37.2201	36.8522	34.952	39.3825	0	0		0.0149548	0.181277	-0.074366	0.022577	0.236492	0.0142468
48	2.14713	89.7439	27.867	27.3197	26.7506	26.9232	24.6564	27.7282	25.1013	27.2306	28.4853	92.9852	32.9357	34.2471	38.6241	37.2103	36.8424	34.9428	39.3721	0	0		0.0273932	0.193155	-0.0597315	0.034839	0.24665	0.0226133
48.1	2.14674	89.7439	27.867	27.3197	26.7506	26.9232	24.6564	27.7282	25.1013	27.2306	28.4853	98.9403	32.927	34.2381	38.6139	37.2004	36.8327	34.9335	39.3617	0	0		0.0397804	0.204938	-0.0451872	0.0470525	0.256752	0.0310164
48.2	2.14646	89.7439	27.867	27.3197	26.7506	26.9232	24.6564	27.7282	25.1013	27.2306	28.4853	104.892	32.9184	34.2291	38.6038	37.1906	36.823	34.9243	39.3514	0	0		0.05185	0.216377	-0.0310438	0.0589548	0.266582	0.0392722
48.3	2.14628	89.7439	27.867	27.3197	26.7506	26.9232	24.6564	27.7282	25.1013	27.2306	28.4853	110.713	32.9097	34.2201	38.5936	37.1809	36.8133	34.9152	39.341	0	0		0.0633622	0.227248	-0.0175788	0.0703092	0.275946	0.0472092
48.4	2.14621	89.7439	27.867	27.3197	26.7506	26.9232	24.6564	27.7282	25.1013	27.2306	28.4853	116.281	32.9011	34.2111	38.5835	37.1711	36.8037	34.906	39.3307	0	0		0.074112	0.237365	-0.00502725	0.0809132	0.284678	0.0546755
48.5	2.14627	89.7439	27.867	27.3197	26.7506	26.9232	24.6564	27.7282	25.1013	27.2306	28.4853	121.485	32.8925	34.2021	38.5734	37.1614	36.7941	34.8969	39.3204	0	0		0.0839351	0.24658	0.00642444	0.0906042	0.292647	0.0615439
48.6	2.14644	89.7439	27.867	27.3197	26.7506	26.9232	24.6564	27.7282	25.1013	27.2306	28.4853	126.232	32.8839	34.1932	38.5633	37.1517	36.7845	34.8878	39.3102	0	0		0.0927103	0.25479	0.016641	0.0992624	0.299758	0.0677157
48.7	2.14675	89.7439	27.867	27.3197	26.7506	26.9232	24.6564	27.7282	25.1013	27.2306	28.4853	130.451	32.8754	34.1843	38.5533	37.142	36.7749	34.8787	39.2999	0	0		0.100361	0.26193	0.025539	0.106812	0.305951	0.0731235
48.8	2.1472	89.7439	27.867	27.3197	26.7506	26.9232	24.6564	27.7282	25.1013	27.2306	28.4853	134.095	32.8668	34.1754	38.5433	37.1324	36.7653	34.8696	39.2897	0	0		0.106856	0.267978	0.0330866	0.113222	0.311203	0.0777317
48.9	2.1478	89.7439	27.867	27.3197	26.7506	26.9232	24.6564	27.7282	25.1013	27.2306	28.4853	137.142	32.8583	34.1666	38.5333	37.1228	36.7558	34.8606	39.2795	0	0		0.112207	0.27295	0.0393008	0.118502	0.315524	0.0815374
49	2.14856	89.7439	27.867	27.3197	26.7506	26.9232	24.6564	27.7282	25.1013	27.2306	28.4853	139.6	32.8498	34.1577	38.5233	37.1132	36.7463	34.8516	39.2694	0	0		0.116465	0.276902	0.044246	0.122703	0.318958	0.0845692
49.1	2.14947	89.7439	27.867	27.3197	26.7506	26.9232	24.6564	27.7282	25.1013	27.2306	28.4853	141.505	32.8413	34.1489	38.5134	37.1036	36.7368	34.8426	39.2593	0	0		0.119721	0.279921	0.04803	0.125917	0.321581	0.0868861
49.2	2.15056	89.7439	27.867	27.3197	26.7506	26.9232	24.6564	27.7282	25.1013	27.2306	28.4853	142.917	32.8329	34.1401	38.5035	37.094	36.7274	34.8336	39.2491	0	0		0.122103	0.282126	0.0508009	0.128267	0.323495	0.0885745
49.3	2.15183	89.7439	27.867	27.3197	26.7506	26.9232	24.6564	27.7282	25.1013	27.2306	28.4853	143.919	32.8244	34.1314	38.4936	37.0845	36.7179	34.8247	39.2391	0	0		0.123768	0.283667	0.0527424	0.129909	0.324829	0.089746
49.4	2.15329	89.7439	27.867	27.3197	26.7506	26.9232	24.6564	27.7282	25.1013	27.2306	28.4853	144.614	32.816	34.1226	38.4837	37.075	36.7085	34.8157	39.229	0	0		0.1249	0.284714	0.0540682	0.131026	0.325733	0.0905322
49.5	2.15494	89.7439	27.867	27.3197	26.7506	26.9232	24.6564	27.7282	25.1013	27.2306	28.4853	145.119	32.8076	34.1139	38.4739	37.0655	36.6991	34.8068	39.219	0	0		0.125704	0.285457	0.0550146	0.131818	0.326371	0.0910809
49.6	2.1568	89.7439	27.867	27.3197	26.7506	26.9232	24.6564	27.7282	25.1013	27.2306	28.4853	145.56	32.7993	34.1052	38.4641	37.0561	36.6898	34.798	39.209	0	0		0.126397	0.286096	0.055832	0.132501	0.326918	0.0915489
49.7	2.15887	89.7439	27.867	27.3197	26.7506	26.9232	24.6564	27.7282	25.1013	27.2306	28.4853	145.523	32.7909	34.0965	38.4543	37.0466	36.6804	34.7891	39.199	0	0		0.126271	0.285979	0.0557051	0.132376	0.326805	0.0914227
49.8	2.16116	89.7439	27.867	27.3197	26.7506	26.9232	24.6564	27.7282	25.1013	27.2306	28.4853	145.486	32.7826	34.0879	38.4445	37.0372	36.6711	34.7803	39.189	0	0		0.126146	0.285863	0.0555785	0.132251	0.326691	0.0912967
49.9	2.16369	89.7439	27.867	27.3197	26.7506	26.9232	24.6564	27.7282	25.1013	27.2306	28.4853	145.449	32.7743	34.0792	38.4348	37.0278	36.6618	34.7714	39.1791	0	0		0.126022	0.285746	0.0554522	0.132126	0.326578	0.091171
50	2.16646	89.7439	27.867	27.3197	26.7506	26.9232	24.6564	27.7282	25.1013	27.2306	28.4853	145.412	32.766	34.0706	38.425	37.0185	36.6526	34.7627	39.1692	0	0		0.125897	0.28563	0.0553261	0.132002	0.326465	0.0910456
50.1	2.16949	89.7439	27.867	27.3197	26.7506	26.9232	24.6564	27.7282	25.1013	27.2306	28.4853	145.376	32.7577	34.062	38.4153	37.0091	36.6433	34.7539	39.1593	0	0		0.125773	0.285514	0.0552003	0.131878	0.326352	0.0909205
50.2	2.17279	89.7439	27.867	27.3197	26.7506	26.9232	24.6564	27.7282	25.1013	27.2306	28.4853	145.339	32.7495	34.0534	38.4057	36.9998	36.6341	34.7451	39.1494	0	0		0.125649	0.285399	0.0550748	0.131754	0.32624	0.0907957
50.3	2.17636	89.7439	27.867	27.3197	26.7506	26.9232	24.6564	27.7282	25.1013	27.2306	28.4853	145.303	32.7412	34.0449	38.396	36.9905	36.6249	34.7364	39.1396	0	0		0.125525	0.285283	0.0549496	0.131631	0.326127	0.0906711
50.4	2.18022	89.7439	27.867	27.3197	26.7506	26.9232	24.6564	27.7282	25.1013	27.2306	28.4853	145.266	32.733	34.0363	38.3864	36.9812	36.6157	34.7277	39.1298	0	0		0.125402	0.285168	0.0548247	0.131508	0.326015	0.0905468
50.5	2.18438	89.7439	27.867	27.3197	26.7506	26.9232	24.6564	27.7282	25.1013	27.2306	28.4853	145.23	32.7248	34.0278	38.3768	36.972	36.6065	34.719	39.12	0	0		0.125279	0.285053	0.0547	0.131385	0.325904	0.0904228
50.6	2.18884	89.7439	27.867	27.3197	26.7506	26.9232	24.6564	27.7282	25.1013	27.2306	28.4853	145.194	32.7167	34.0193	38.3672	36.9628	36.5974	34.7104	39.1103	0	0		0.125156	0.284939	0.0545756	0.131262	0.325792	0.0902991
50.7	2.19363	89.7439	27.867	27.3197	26.7506	26.9232	24.6564	27.7282	25.1013	27.2306	28.4853	145.158	32.7085	34.0109	38.3577	36.9536	36.5883	34.7017	39.1005	0	0		0.125034	0.284824	0.0544515	0.13114	0.325681	0.0901756
50.8	2.19873	89.7439	27.867	27.3197	26.7506	26.9232	24.6564	27.7282	25.1013	27.2306	28.4853	145.121	32.7004	34.0024	38.3482	36.9444	36.5792	34.6931	39.0908	0	0		0.124911	0.28471	0.0543277	0.131018	0.32557	0.0900524
50.9	2.20418	89.7439	27.867	27.3197	26.7506	26.9232	24.6564	27.7282	25.1013	27.2306	28.4853	145.086	32.6923	33.994	38.3387	36.9352	36.5702	34.6845	39.0811	0	0		0.124789	0.284596	0.0542041	0.130896	0.325459	0.0899295
51	2.20996	89.7439	27.867	27.3197	26.7506	26.9232	24.6564	27.7282	25.1013	27.2306	28.4853	145.05	32.6842	33.9856	38.3292	36.9261	36.5611	34.6759	39.0715	0	0		0.124668	0.284483	0.0540809	0.130775	0.325349	0.0898069
51.1	2.21609	89.7439	27.867	27.3197	26.7506	26.9232	24.6564	27.7282	25.1013	27.2306	28.4853	145.014	32.6762	33.9772	38.3197	36.917	36.5521	34.6674	39.0618	0	0		0.124546	0.284369	0.0539579	0.130653	0.325238	0.0896845
51.2	2.22258	89.7439	27.867	27.3197	26.7506	26.9232	24.6564	27.7282	25.1013	27.2306	28.4853	144.978	32.6681	33.9688	38.3103	36.9079	36.5431	34.6588	39.0522	0	0		0.124425	0.284256	0.0538351	0.130532	0.325128	0.0895624
51.3	2.22943	89.7439	27.867	27.3197	26.7506	26.9232	24.6564	27.7282	25.1013	27.2306	28.4853	144.943	32.6601	33.9605	38.3009	36.8989	36.5341	34.6503	39.0426	0	0		0.124304	0.284143	0.0537127	0.130412	0.325018	0.0894406
51.4	2.23665	89.7439	27.867	27.3197	26.7506	26.9232	24.6564	27.7282	25.1013	27.2306	28.4853	144.907	32.6521	33.9522	38.2915	36.8898	36.5252	34.6418	39.0331	0	0		0.124184	0.284031	0.0535905	0.130291	0.324909	0.089319
51.5	2.24423	89.7439	27.867	27.3197	26.7506	26.9232	24.6564	27.7282	25.1013	27.2306	28.4853	144.872	32.6441	33.9439	38.2821	36.8808	36.5162	34.6334	39.0235	0	0		0.124063	0.283918	0.0534686	0.130171	0.324799	0.0891978
51.6	2.2522	89.7439	27.867	27.3197	26.7506	26.9232	24.6564	27.7282	25.1013	27.2306	28.4853	144.836	32.6362	33.9356	38.2728	36.8718	36.5073	34.6249	39.014	0	0		0.123943	0.283806	0.053347	0.130051	0.32469	0.0890768
51.7	2.26054	89.7439	27.867	27.3197	26.7506	26.9232	24.6564	27.7282	25.1013	27.2306	28.4853	144.801	32.6282	33.9273	38.2635	36.8628	36.4984	34.6165	39.0045	0	0		0.123823	0.283694	0.0532256	0.129932	0.324581	0.088956
51.8	2.26925	89.7439	27.867	27.3197	26.7506	26.9232	24.6564	27.7282	25.1013	27.2306	28.4853	144.766	32.6203	33.9191	38.2542	36.8539	36.4896	34.6081	38.995	0	0		0.123704	0.283583	0.0531045	0.129812	0.324473	0.0888355
51.9	2.27835	89.7439	27.867	27.3197	26.7506	26.9232	24.6564	27.7282	25.1013	27.2306	28.4853	144.731	32.6124	33.9109	38.2449	36.8449	36.4807	34.5997	38.9856	0	0		0.123584	0.283471	0.0529837	0.129693	0.324364	0.0887154
52	2.28782	89.7439	27.867	27.3197	26.7506	26.9232	24.6564	27.7282	25.1013	27.2306	28.4853	144.696	32.6045	33.9027	38.2357	36.836	36.4719	34.5913	38.9762	0	0		0.123465	0.28336	0.0528632	0.129574	0.324256	0.0885954
52.1	2.29767	89.8769	27.867	27.3197	26.7506	26.9232	24.6564	27.7282	25.1013	27.2306	28.4853	144.661	32.5966	33.8945	38.2265	36.8272	36.4631	34.583	38.9668	0	0		0.123053	0.283249	0.0524491	0.129162	0.324148	0.0882769
52.2	2.3079	90.0278	27.867	27.3197	26.7506	26.9232	24.6564	27.7282	25.1013	27.2306	28.4853	144.626	32.5888	33.8864	38.2173	36.8183	36.4544	34.5747	38.9574	0	0		0.122602	0.283138	0.0519959	0.128711	0.324041	0.087932
52.3	2.31849	90.2316	27.867	27.3197	26.7506	26.9232	24.6564	27.7282	25.1013	27.2306	28.4853	144.591	32.581	33.8782	38.2081	36.8095	36.4456	34.5664	38.948	0	0		0.122034	0.283028	0.0514267	0.128144	0.323933	0.0875085
52.4	2.32945	90.5206	27.867	27.3197	26.7506	26.9232	24.6564	27.7282	25.1013	27.2306	28.4853	144.557	32.5732	33.8701	38.1989	36.8006	36.4369	34.5581	38.9387	0	0		0.12128	0.282918	0.0506704	0.12739	0.323826	0.0869583
52.5	2.34077	90.9234	27.867	27.3197	26.7506	26.9232	24.6564	27.7282	25.1013	27.2306	28.4853	144.522	32.5654	33.862	38.1898	36.7918	36.4282	34.5498	38.9294	0	0		0.120276	0.282808	0.0496648	0.126387	0.323719	0.086239
52.6	2.35244	91.463	27.867	27.3197	26.7506	26.9232	24.6564	27.7282	25.1013	27.2306	28.4853	144.488	32.5576	33.8539	38.1807	36.7831	36.4195	34.5416	38.9201	0	0		0.118974	0.282698	0.0483606	0.125085	0.323612	0.0853169
52.7	2.36446	92.1564	28.8719	27.3197	26.7506	26.9232	24.6564	27.7282	25.1013	27.2306	28.4853	144.453	32.5499	33.8459	38.1716	36.7743	36.4108	34.5334	38.9108	0	0		0.117338	0.282589	0.0445298	0.121257	0.320764	0.0826772
52.8	2.37681	93.013	30.0118	27.3197	26.7506	26.9232	24.6564	27.7282	25.1013	27.2306	28.4853	144.419	32.5421	33.8378	38.1625	36.7656	36.4022	34.5252	38.9016	0	0		0.115351	0.282479	0.0400804	0.116808	0.317561	0.0796098
52.9	2.3895	94.0348	31.5507	27.3197	26.7506	26.9232	24.6564	27.7282	25.1013	27.2306	28.4853	144.385	32.5344	33.8298	38.1535	36.7569	36.3935	34.517	38.8924	0	0		0.113011	0.28237	0.0344599	0.111184	0.313296	0.0757325
53	2.4025	95.2159	33.7337	27.3197	26.7506	26.9232	24.6564	27.7282	25.1013	27.2306	28.4853	144.351	32.5267	33.8218	38.1445	36.7482	36.3849	34.5088	38.8832	0	0		0.110336	0.282262	0.0272009	0.103914	0.307335	0.0707152
53.1	2.4158	96.5432	36.776	27.3197	26.7506	26.9232	24.6564	27.7282	25.1013	27.2306	28.4853	144.317	32.5191	33.8139	38.1355	36.7395	36.3764	34.5007	38.874	0	0		0.107359	0.282153	0.0179539	0.0946427	0.299157	0.0643
53.2	2.42941	97.9966	40.8523	27.3197	26.7506	26.9232	24.6564	27.7282	25.1013	27.2306	28.4853	144.283	32.5114	33.8059	39.1523	36.7309	36.3678	34.4926	38.8649	0	0		0.105902	0.283683	0.00651312	0.0849191	0.289854	0.0576101
53.3	2.44329	99.5501	46.0893	27.3197	26.7506	26.9232	24.6564	27.7282	25.1013	27.2306	28.4853	144.249	32.5038	33.798	40.3065	36.7223	36.3593	34.4845	38.8558	0	0		0.104483	0.285424	-0.00716908	0.0731589	0.277985	0.0494568
53.4	2.45744	101.173	52.5593	27.3197	26.7506	26.9232	24.6564	27.7282	25.1013	27.2306	28.4853	144.215	32.4962	33.7901	41.8673	36.7137	36.3508	34.4764	38.8467	0	0		0.10363	0.287797	-0.0229826	0.0599187	0.263943	0.0402104
53.5	2.47184	102.832	60.2768	27.3197	26.7506	26.9232	24.6564	27.7282	25.1013	27.2306	28.4853	144.181	32.4886	34.8161	44.0844	36.7051	37.4766	34.4684	38.8376	0	0		0.107501	0.29279	-0.0406749	0.0458551	0.249772	0.0330034
53.6	2.48647	104.49	69.1982	27.3197	26.7506	26.9232	24.6564	27.7282	25.1013	28.2234	28.4853	144.148	32.481	35.9806	47.1768	36.6965	38.7544	34.4603	38.8285	0	0		0.111161	0.296462	-0.0598789	0.0316697	0.232564	0.0246422
53.7	2.50132	106.113	79.2235	27.3197	26.7506	26.9232	24.6564	27.7282	25.1013	29.3497	28.4853	144.114	32.4735	37.5548	51.3222	36.688	40.4818	34.4523	38.8195	0	0		0.117605	0.301871	-0.0801497	0.0180488	0.215592	0.0174368
53.8	2.51638	107.666	90.201	27.3197	26.7506	26.9232	24.6564	27.7282	25.1013	30.8701	28.4853	144.081	32.4659	39.7906	56.6488	36.6795	42.935	34.4443	38.8105	0	0		0.127178	0.308724	-0.101004	0.00560615	0.199375	0.012065
53.9	2.53161	109.12	101.935	27.3197	27.6492	26.9232	24.6564	27.7282	25.1013	33.0269	28.4853	144.047	32.4584	42.9087	63.2296	37.6637	46.3562	34.4363	38.8015	0	0		0.138133	0.314184	-0.12334	-0.00516089	0.185761	0.00912694
54	2.54701	110.447	114.193	27.3197	28.6687	26.9232	24.6564	27.7282	25.1013	36.0327	28.4853	144.014	32.4509	47.088	71.0786	38.7809	50.9418	34.4284	38.7925	0	0		0.151785	0.319975	-0.145364	-0.0138978	0.173896	0.0088411
54.1	2.56255	111.628	126.72	27.3197	30.045	26.9232	25.6622	27.7282	25.1013	40.0601	28.4853	143.981	32.4434	52.4581	80.1503	40.2916	56.8338	34.4204	38.7836	0	0		0.167142	0.32503	-0.166984	-0.0218615	0.164347	0.0102096
54.2	2.5782	112.65	139.247	27.3197	31.9974	26.9232	26.8034	27.7282	25.1013	45.2343	28.4853	143.948	33.4878	59.0922	90.3421	42.4376	64.1127	34.4125	38.7747	0	0		0.184422	0.329741	-0.186067	-0.0260572	0.158724	0.0151471
54.3	2.59395	113.507	151.505	27.3197	34.7181	26.9232	28.3438	28.7494	25.1013	51.6267	28.4853	144.738	34.6732	67.0045	101.499	45.4306	72.794	34.4046	38.7658	0	0		0.202189	0.330813	-0.204026	-0.0271788	0.155242	0.0218176
54.4	2.60978	114.2	163.238	27.3197	38.3637	27.6794	30.5291	29.908	25.1013	59.2517	28.4853	145.638	36.2754	76.1494	113.42	49.4428	82.8275	34.3968	38.7569	0	0		0.217621	0.32793	-0.220412	-0.0273797	0.154722	0.0292871
54.5	2.62564	114.74	174.216	27.3197	43.0474	28.5373	33.5744	31.472	25.1013	68.0661	28.4853	146.864	38.5506	86.4232	125.87	54.5982	94.0997	35.457	38.7481	0	0		0.231646	0.322595	-0.232667	-0.0242532	0.158	0.0385321
54.6	2.64153	115.142	184.241	28.2548	48.8337	29.6954	37.655	33.6907	25.1013	77.9711	28.4853	148.617	41.7235	97.6697	138.588	60.9674	106.439	36.6604	38.7392	0	0		0.242459	0.312873	-0.242079	-0.0193927	0.162402	0.047192
54.7	2.65741	115.431	193.163	29.3156	55.7358	31.3382	42.8974	36.7826	25.1013	88.817	28.4853	151.073	45.9762	109.687	151.3	68.5641	119.624	38.2871	38.7304	0	0		0.251159	0.300679	-0.247861	-0.0128224	0.168871	0.0555891
54.8	2.67326	115.635	200.88	30.7476	63.7145	33.6277	49.374	40.9255	25.1013	100.41	28.4853	154.373	51.4403	122.237	163.733	77.3442	133.394	40.5973	38.7216	0	0		0.257378	0.286023	-0.249528	-0.00469949	0.176763	0.0631917
54.9	2.68904	115.786	207.35	32.779	72.6804	36.6954	57.0994	46.2481	25.886	112.521	28.4853	158.621	58.1906	135.057	175.627	87.2084	147.459	43.819	38.7129	0	0		0.260063	0.268077	-0.247673	0.00387575	0.184614	0.0690809
55	2.70474	115.919	212.587	35.61	82.498	40.6366	66.03	52.8237	26.7761	124.898	28.4853	163.875	66.2414	147.871	186.747	98.0067	161.519	48.1372	38.7041	0	0		0.260209	0.248475	-0.241771	0.0133482	0.19269	0.0735474
55.1	2.72032	115.919	216.663	39.4033	92.9918	45.5056	76.0656	60.6673	27.9778	137.274	28.4853	170.146	75.5462	160.404	196.894	109.545	175.27	53.6855	38.6954	0	0		0.257965	0.227513	-0.23233	0.023289	0.200322	0.0764535
55.2	2.73577	115.919	219.706	44.2766	103.955	51.3136	87.0544	69.7344	29.6825	149.385	28.4853	177.399	85.9997	172.394	205.915	121.595	188.424	60.5399	38.6867	0	0		0.253347	0.20558	-0.22025	0.0330518	0.206996	0.077644
55.3	2.75106	115.919	221.889	50.2973	115.158	58.0275	98.8	79.9234	32.0582	160.978	29.327	185.55	97.4429	183.603	213.71	133.904	200.723	68.715	38.678	0	0		0.246621	0.183097	-0.207064	0.0414401	0.211646	0.0767252
55.4	2.76616	115.919	223.428	57.4789	126.361	65.5722	111.071	91.0802	35.2414	171.824	30.2819	194.476	109.67	193.833	220.233	146.208	211.947	78.1636	39.7272	0	0		0.238102	0.161151	-0.191769	0.0496472	0.214734	0.0746902
55.5	2.78106	115.919	224.568	65.7807	137.324	73.8334	123.611	103.005	39.3309	181.729	31.571	204.016	122.44	202.927	225.502	158.242	221.925	88.7786	40.918	0	0		0.228129	0.13946	-0.176524	0.0564296	0.215985	0.0711755
55.6	2.79573	115.919	225.572	75.1098	147.818	82.6637	136.15	115.464	44.3833	190.544	33.3996	213.979	135.484	210.784	229.59	169.754	230.546	100.399	42.5281	0	0		0.217045	0.11851	-0.161851	0.0616821	0.215263	0.0664139
55.7	2.81016	115.919	225.572	85.325	157.635	91.8889	148.421	128.195	50.4098	198.169	35.948	224.158	148.523	217.361	232.627	180.517	237.762	112.815	44.8151	0	0		0.205187	0.0987017	-0.147404	0.0662278	0.213295	0.0611116
55.8	2.82431	115.919	225.572	96.2438	166.601	101.316	160.167	140.927	57.3765	204.561	39.3626	234.332	161.275	222.673	234.791	190.339	243.59	125.782	48.0048	0	0		0.192879	0.080361	-0.134102	0.069467	0.20957	0.0551643
55.9	2.83818	115.919	225.572	107.651	174.58	110.743	171.156	153.385	65.2051	209.735	43.7495	244.282	173.475	226.795	236.3	199.071	248.113	139.028	52.2805	0	0		0.180433	0.0637434	-0.122053	0.0716362	0.204349	0.0488944
56	2.85174	115.919	225.572	119.308	181.482	119.968	181.191	165.31	73.7774	213.763	49.1692	253.801	184.882	229.858	237.404	206.615	251.473	152.268	57.7745	0	0		0.168144	0.0490439	-0.111309	0.0729731	0.197908	0.0425941
56.1	2.86497	115.919	225.572	130.965	187.269	128.799	190.122	176.467	82.9401	216.768	55.634	262.698	195.29	232.04	238.371	212.93	253.868	165.218	64.562	0	0		0.156293	0.0364027	-0.101877	0.073707	0.190534	0.0365253
56.2	2.87786	115.919	225.572	142.372	191.952	137.06	197.847	186.656	92.5124	218.925	63.1072	270.815	204.544	233.563	238.319	218.03	255.538	177.607	72.6574	0	0		0.144676	0.025345	-0.0937307	0.0734563	0.182099	0.0305738
56.3	2.89039	115.919	225.572	153.29	195.598	144.605	204.324	195.723	102.295	220.446	71.505	278.029	212.54	234.677	238.266	221.988	256.761	189.19	82.0142	0	0		0.133859	0.0163163	-0.0868136	0.0728549	0.173184	0.0251857
56.4	2.90254	115.919	225.274	163.506	198.319	151.319	209.566	203.567	112.077	221.572	80.7006	284.259	219.233	235.653	238.214	224.928	257.832	199.76	92.5263	0	0		0.123973	0.0092097	-0.0808934	0.0721348	0.164132	0.0205539
56.5	2.9143	115.919	224.936	172.835	200.271	157.127	213.647	210.143	121.649	222.565	90.5295	289.469	224.639	235.601	238.162	227.023	257.776	209.157	104.034	0	0		0.114169	0.00336189	-0.0760285	0.0712094	0.154617	0.0159983
56.6	2.92565	115.919	224.48	181.137	201.647	161.996	216.692	215.465	130.812	222.565	100.798	293.673	228.834	235.55	238.11	228.485	257.719	217.277	116.33	0	0		0.105739	-0.000504508	-0.0720808	0.070188	0.145668	0.0123958
56.7	2.93658	115.919	223.832	188.318	202.667	165.937	218.877	219.608	139.384	222.565	111.291	296.929	231.952	235.499	238.059	229.554	257.663	224.074	129.172	0	0		0.09818	-0.00302544	-0.068911	0.069172	0.137079	0.00944973
56.8	2.94707	115.919	222.93	194.339	203.565	169.004	220.418	222.7	147.213	222.565	121.785	299.342	234.173	235.448	238.007	230.491	257.608	229.564	142.29	0	0		0.0914787	-0.00438586	-0.0663796	0.0682543	0.129108	0.00714405
56.9	2.95712	115.919	221.72	199.212	203.565	171.294	221.559	224.919	154.179	222.565	132.053	301.055	235.724	235.397	237.956	230.441	257.552	233.824	155.403	0	0		0.0860808	-0.0043567	-0.0638661	0.0675184	0.121621	0.00542448
57	2.96671	115.919	220.167	203.005	203.565	172.937	222.565	226.483	160.206	222.565	141.882	302.243	236.859	235.346	237.904	230.391	257.496	236.989	168.228	0	0		0.0816214	-0.00345294	-0.0615654	0.0670372	0.115079	0.00425937
57.1	2.97583	115.919	218.247	205.836	203.565	174.095	222.565	227.641	165.258	222.565	151.077	303.105	237.853	235.295	237.853	230.342	257.441	239.245	180.497	0	0		0.0781372	-0.00182019	-0.0592475	0.0674138	0.109586	0.00388217
57.2	2.98448	115.919	215.958	207.868	203.565	174.953	222.565	228.662	169.348	222.565	159.475	303.858	237.802	235.245	237.802	230.292	257.386	240.82	191.969	0	0		0.0751696	-0.000118306	-0.057309	0.0678418	0.104823	0.00370719
57.3	2.99264	115.919	213.312	209.3	203.565	175.709	222.565	228.662	172.531	222.58	166.948	303.793	237.751	235.194	237.751	230.243	257.33	241.973	202.437	0	0		0.072621	0.00188481	-0.0550983	0.0684164	0.101247	0.00396662
57.4	3.0003	115.919	210.338	210.361	203.565	175.709	222.565	228.662	174.906	222.597	173.413	303.728	237.7	235.144	237.7	230.194	257.275	242.982	211.744	0	0		0.0709547	0.00418341	-0.0526162	0.0697984	0.0986697	0.00473276
57.5	3.00746	115.919	207.081	211.296	203.565	175.709	222.565	228.662	176.611	222.621	178.833	303.663	237.649	235.094	237.649	230.145	257.22	242.93	219.786	0	0		0.0696488	0.00627054	-0.0504295	0.0711526	0.0966091	0.00544532
57.6	3.01412	115.919	203.6	211.296	203.565	175.709	222.565	228.662	177.813	222.654	183.22	303.598	237.599	235.044	237.599	230.096	257.166	242.879	226.517	0	0		0.0689875	0.00839735	-0.0481247	0.0727824	0.0956387	0.00651102
57.7	3.02026	115.919	199.964	211.296	203.565	175.709	222.565	228.662	178.703	222.7	186.634	303.534	237.548	234.994	237.548	230.047	257.438	242.827	231.955	0	0		0.0685889	0.0101141	-0.0458291	0.0745499	0.095245	0.00769398
57.8	3.02588	115.919	196.248	211.296	203.565	175.709	222.565	228.662	179.488	222.762	189.183	303.47	237.498	234.944	237.733	229.998	257.754	242.776	236.174	0	0		0.0683404	0.0114663	-0.0436703	0.0764045	0.0953479	0.00890265
57.9	3.03098	115.919	192.532	211.296	203.565	175.709	222.494	228.662	179.488	222.842	191.011	302.315	237.448	234.895	237.95	229.949	258.199	242.724	239.309	0	0		0.0680726	0.0122718	-0.0419047	0.0781345	0.0956985	0.0100019
58	3.03556	115.919	188.896	211.296	203.565	175.709	222.414	228.631	179.488	222.94	192.301	301.014	237.398	234.845	238.259	229.901	258.854	242.673	241.544	0	0		0.0678577	0.0127007	-0.0404287	0.0797059	0.0962235	0.0110376
58.1	3.03961	115.919	185.415	211.296	203.085	175.709	222.306	228.596	179.488	223.058	193.255	299.281	237.348	234.796	238.72	229.853	259.788	242.622	243.104	0	0		0.0678488	0.0129384	-0.0391916	0.0809983	0.0967224	0.0120765
58.2	3.04314	115.919	182.158	211.296	202.541	175.709	222.152	228.549	179.488	223.194	194.097	296.85	237.298	234.746	239.381	229.804	261.057	242.571	244.245	0	0		0.0677974	0.0128352	-0.0385115	0.0819024	0.0970091	0.0129688
58.3	3.04614	115.919	179.184	211.296	201.805	175.709	221.938	228.481	179.488	223.346	194.097	293.488	237.248	234.697	240.284	229.756	262.703	242.52	245.245	0	0		0.0677015	0.0124793	-0.0380042	0.0827701	0.0972949	0.0139586
58.4	3.04861	115.919	176.538	211.296	200.762	175.709	221.651	228.388	179.488	223.513	194.097	289.007	237.199	234.648	241.458	229.708	264.749	242.47	245.194	0	0		0.0675611	0.0114932	-0.0385587	0.0827715	0.0971683	0.0145895
58.5	3.05056	115.919	174.248	211.296	199.309	175.709	221.283	228.262	179.488	223.692	194.097	283.269	237.149	234.599	242.919	229.66	267.198	242.419	245.143	0	0		0.0673782	0.0102912	-0.0397002	0.0822597	0.0965773	0.0151204
58.6	3.052	115.919	172.329	210.762	197.361	175.709	220.827	228.1	179.488	223.878	194.097	276.197	237.1	234.55	244.671	229.612	270.038	242.369	245.092	0	0		0.0673973	0.00909651	-0.0414437	0.0811962	0.0957093	0.0156894
58.7	3.05291	115.919	170.776	210.157	194.859	175.709	220.284	227.901	179.488	224.069	194.097	267.777	237.051	234.502	246.704	230.052	273.234	242.318	245.041	0	0		0.067417	0.0077328	-0.0437794	0.0795666	0.0945321	0.0163041
58.8	3.05332	115.919	169.566	209.34	191.767	175.709	219.657	227.663	179.488	224.259	194.097	258.056	237.002	234.453	248.995	230.558	276.739	242.268	244.99	0	0		0.0675086	0.00627935	-0.0466731	0.0773814	0.0929751	0.0169036
58.9	3.05323	115.919	168.664	208.181	188.08	175.709	218.951	227.388	179.488	224.446	194.097	247.143	237.507	234.405	251.506	231.257	280.487	242.218	244.94	0	0		0.0679618	0.00504799	-0.0497826	0.0749011	0.0913626	0.0177088
59	3.05264	115.919	168.016	206.565	183.817	175.709	218.179	227.078	179.488	224.624	194.097	235.203	238.087	234.356	254.193	232.268	284.403	242.543	244.889	0	0		0.0686518	0.00392987	-0.0530735	0.0721464	0.0898083	0.0187721
59.1	3.05156	115.919	167.56	204.401	179.027	175.709	217.353	226.74	179.488	224.791	194.097	222.45	238.886	234.308	257.002	233.695	288.406	242.918	244.839	0	0		0.0696943	0.00307003	-0.0565315	0.0691284	0.0884056	0.0201215
59.2	3.05	115.919	167.222	201.62	173.782	175.174	216.491	226.378	179.488	224.944	194.097	209.135	240.041	234.26	259.872	235.623	292.407	243.441	244.789	0	0		0.0714407	0.00283235	-0.0599108	0.0662997	0.0873904	0.0220236
59.3	3.04798	115.765	166.924	198.185	168.175	174.567	215.61	226	179.488	225.079	194.097	195.534	241.669	234.212	262.741	238.113	296.319	244.205	244.739	0	0		0.0738374	0.00314858	-0.0628872	0.0637207	0.0869838	0.0245044
59.4	3.04549	115.59	166.924	194.087	162.318	173.747	214.728	225.614	179.488	225.197	194.097	181.939	243.866	234.164	265.547	241.199	300.06	245.288	244.689	0	0		0.0769541	0.00418476	-0.0654394	0.0614374	0.0872397	0.0275595
59.5	3.04256	115.354	166.924	189.35	156.333	172.585	213.866	225.227	178.936	225.295	194.097	168.64	246.702	234.117	268.229	244.889	303.554	246.756	244.639	0	0		0.0811773	0.00631964	-0.0669552	0.06009	0.0886397	0.0314999
59.6	3.03919	115.02	166.924	184.027	150.347	170.965	213.04	224.849	178.311	225.375	193.489	155.914	250.216	234.069	270.733	249.16	306.739	248.656	244.589	0	0		0.0863741	0.00945511	-0.0671909	0.0599493	0.0913241	0.036413
59.7	3.0354	114.553	166.924	178.198	144.49	168.794	212.268	224.487	177.467	225.437	192.8	144.01	254.416	234.022	273.015	253.965	309.565	251.014	244.539	0	0		0.0926672	0.0137199	-0.0661935	0.0610009	0.095168	0.0422096
59.8	3.03118	113.928	166.924	171.968	138.884	166.006	211.562	224.149	176.269	225.483	191.869	133.142	259.278	233.974	275.039	259.228	312.001	253.836	244.49	0	0		0.100135	0.019195	-0.0637374	0.0635056	0.10028	0.0489473
59.9	3.02657	113.125	166.924	165.46	133.639	162.561	210.935	223.84	174.6	225.516	190.549	123.471	264.745	233.927	276.782	264.856	314.032	257.104	243.694	0	0		0.108808	0.0255823	-0.0600849	0.0673397	0.106706	0.0564541
60	3.02155	112.133	166.924	158.808	128.849	158.451	210.392	223.564	172.364	225.54	188.709	115.105	270.734	233.88	278.233	270.735	315.663	260.782	242.798	0	0		0.118663	0.0331356	-0.0547953	0.0729022	0.114432	0.0648687
60.1	3.01615	110.949	166.924	152.157	124.586	153.7	209.937	223.326	169.491	225.557	186.243	108.091	277.138	233.833	279.397	276.742	316.919	264.813	241.606	0	0		0.129628	0.0416863	-0.0479787	0.0801555	0.123381	0.0740761
60.2	3.01038	109.581	166.924	145.648	120.898	148.362	209.568	223.127	165.942	225.572	183.076	102.411	283.827	233.786	280.29	282.747	317.839	269.124	239.937	0	0		0.141578	0.0510192	-0.0398152	0.0889915	0.133424	0.0839285
60.3	3.00423	108.044	166.924	139.418	117.807	142.516	209.281	222.965	161.708	225.572	179.163	97.9876	290.662	233.739	280.942	288.619	318.481	273.627	237.631	0	0		0.154353	0.0608912	-0.0305429	0.099239	0.144389	0.0942577
60.4	2.99773	106.36	166.924	133.589	115.305	136.268	209.067	222.84	156.814	225.572	174.495	94.6827	297.494	233.692	281.395	294.236	318.915	278.23	234.558	0	0		0.16774	0.0710213	-0.0204437	0.110673	0.156055	0.10487
60.5	2.99087	104.561	166.924	128.266	113.357	129.741	208.914	222.746	151.315	225.572	169.099	92.3068	304.175	233.646	281.697	299.484	319.22	282.83	230.625	0	0		0.181506	0.0811246	-0.0098285	0.123024	0.168181	0.115566
60.6	2.98367	102.681	166.924	123.529	111.904	123.07	208.805	222.678	145.293	225.572	163.035	90.6273	310.566	233.6	281.906	304.271	319.482	287.329	225.779	0	0		0.195399	0.0909185	0.000977767	0.13599	0.180512	0.126148
60.7	2.97614	100.76	166.924	119.432	110.86	116.4	208.725	222.631	138.856	225.572	156.396	89.379	316.539	233.553	282.084	308.522	319.418	291.631	220.01	0	0		0.209022	0.100136	0.0116491	0.149246	0.192786	0.136335
60.8	2.96829	98.8396	166.924	115.996	110.125	109.873	208.654	222.596	132.131	225.572	149.299	88.277	321.986	233.507	282.028	312.19	319.355	295.651	213.35	0	0		0.222122	0.108422	0.0218708	0.162346	0.20467	0.145946
60.9	2.96013	96.9598	166.924	113.215	109.581	103.624	208.654	222.565	125.26	225.572	141.885	88.2596	326.824	233.461	281.972	315.255	319.292	299.316	205.875	0	0		0.234976	0.116184	0.0320174	0.175473	0.216361	0.155117
61	2.95167	95.1605	166.924	111.051	109.1	97.779	208.654	222.565	118.388	224.842	134.308	88.2423	331	233.415	281.917	317.722	319.229	302.569	197.696	0	0		0.247489	0.123287	0.0413729	0.187978	0.227715	0.163744
61.1	2.94292	93.4771	166.924	109.436	109.1	92.4405	208.654	222.565	111.663	224.013	126.732	88.2249	334.489	233.369	281.861	319.628	318.093	305.375	188.961	0	0		0.258449	0.129094	0.0495496	0.19963	0.238331	0.171144
61.2	2.93388	91.9398	166.924	108.277	109.1	87.6899	208.654	222.565	105.226	222.894	119.318	88.2076	337.299	233.323	281.806	321.034	316.813	307.716	179.84	0	0		0.2685	0.133954	0.0567031	0.210226	0.248225	0.177691
61.3	2.92459	90.5717	166.924	107.46	109.1	83.5804	208.654	222.565	99.2042	221.307	112.221	88.1904	339.471	233.278	281.751	322.025	315.108	309.599	170.524	0	0		0.277587	0.138006	0.0627496	0.219605	0.257443	0.183356
61.4	2.91503	89.3883	166.531	106.854	109.1	80.1352	208.654	222.565	93.7046	219.095	105.581	88.1732	341.075	233.232	281.696	322.705	312.716	311.051	161.212	0	0		0.285712	0.141433	0.0678997	0.227901	0.266265	0.188289
61.5	2.90524	88.3961	166.086	106.321	109.1	77.3465	208.654	222.565	88.8105	216.131	99.5177	88.156	342.207	233.187	281.641	323.192	309.408	312.119	152.102	0	0		0.292932	0.144464	0.0719616	0.234858	0.274633	0.192437
61.6	2.89521	87.5931	165.486	106.321	109.1	75.1758	208.654	222.565	84.5769	212.323	94.1218	88.1389	342.985	233.142	281.587	323.614	304.998	312.868	143.385	0	0		0.29895	0.146988	0.0750741	0.240562	0.282422	0.195723
61.7	2.88497	86.968	164.633	106.321	109.1	73.5559	208.654	221.887	81.0276	207.619	89.454	88.1218	343.543	233.096	280.905	323.552	299.351	313.378	135.23	0	0		0.30395	0.149641	0.0778789	0.244917	0.290052	0.198419
61.8	2.87453	86.5015	163.446	106.321	109.1	72.3934	208.654	221.119	78.1547	202.008	85.5408	88.1048	344.028	233.051	280.14	323.489	292.392	313.74	127.784	0	0		0.308233	0.152514	0.0802434	0.248369	0.297631	0.200689
61.9	2.8639	86.1667	161.854	106.321	109.1	71.574	208.076	220.081	75.9185	195.521	82.3733	88.0878	343.962	233.006	279.127	323.427	284.104	314.052	121.157	0	0		0.31165	0.155557	0.0822113	0.251275	0.305146	0.202771
62	2.8531	85.9307	159.81	106.321	109.1	70.967	207.42	218.609	74.2496	188.232	79.9078	88.0709	342.832	232.962	277.713	322.34	274.536	313.992	115.424	0	0		0.314068	0.158687	0.0835746	0.25312	0.312169	0.204173
62.1	2.84214	85.7559	157.284	106.321	109.1	70.4319	206.534	216.558	73.0521	180.251	78.0678	88.054	341.559	232.917	275.763	321.115	263.795	313.932	110.615	0	0		0.315915	0.162469	0.0853517	0.254739	0.319433	0.205625
62.2	2.83103	85.6018	154.272	106.321	109.1	70.4319	205.277	213.81	72.2079	171.72	76.7474	88.0371	339.865	232.872	273.171	319.485	252.043	313.871	106.721	0	0		0.316762	0.166499	0.087651	0.255921	0.326885	0.206977
62.3	2.8198	85.6018	150.789	106.321	109.1	70.4319	203.526	210.279	71.5825	162.807	75.8167	88.0203	337.49	232.828	269.856	317.199	239.49	313.811	103.686	0	0		0.316793	0.170994	0.0904421	0.257039	0.334479	0.208385
62.4	2.80844	85.6018	146.875	106.321	109.1	70.4319	201.179	205.916	71.0313	153.699	75.1272	88.0035	334.207	232.783	265.775	314.038	226.383	312.84	101.417	0	0		0.316042	0.175815	0.0933367	0.257917	0.34192	0.209681
62.5	2.79699	85.6018	142.59	106.321	109.1	70.4319	198.165	200.713	71.0313	144.591	74.5195	87.9868	329.832	232.739	260.919	309.824	212.995	311.747	99.7845	0	0		0.313982	0.180381	0.0963675	0.25853	0.349032	0.210819
62.6	2.78544	85.6018	138.009	106.321	109.1	70.4319	194.44	194.698	71.0313	135.678	74.5195	87.9701	324.231	232.695	255.315	304.43	199.612	310.293	98.6283	0	0		0.310884	0.184793	0.0991662	0.258644	0.35553	0.211608
62.7	2.77383	85.6018	133.224	106.321	109.1	70.4319	189.997	187.938	71.0313	127.147	74.5195	87.9534	317.328	232.651	249.027	297.782	186.52	308.256	97.7673	0	0		0.306642	0.188784	0.101778	0.258451	0.361492	0.21209
62.8	2.76216	85.6018	128.334	106.321	109.1	70.4319	184.862	180.537	71.0313	119.165	74.5195	87.9368	309.109	232.112	242.148	289.867	173.992	305.441	97.0065	0	0		0.300972	0.191844	0.103803	0.257701	0.366503	0.211929
62.9	2.75046	85.6018	123.444	106.321	109.1	70.4319	179.09	172.625	71.0313	111.876	74.5195	87.9202	299.622	231.507	234.802	280.728	162.274	301.69	96.9882	0	0		0.294024	0.194352	0.105374	0.256534	0.37043	0.211278
63	2.73872	85.6018	118.658	106.321	109.1	70.4319	172.771	164.36	71.0313	105.39	74.5195	87.9037	288.971	230.705	227.131	270.47	151.573	296.89	96.97	0	0		0.285764	0.195754	0.105783	0.254483	0.372997	0.209773
63.1	2.72698	85.6018	114.078	106.321	109.1	70.4319	166.017	155.914	71.0313	99.7785	74.5195	87.8872	277.318	229.587	219.297	259.246	142.051	290.975	96.9518	0	0		0.276211	0.195892	0.104804	0.251431	0.373961	0.207266
63.2	2.71525	85.6018	109.792	106.321	109.1	70.4319	158.96	147.468	71.0313	95.0743	74.5195	87.8708	264.871	228.046	211.466	247.257	133.814	283.932	96.9337	0	0		0.265441	0.194651	0.10224	0.247284	0.373116	0.203637
63.3	2.70353	85.6018	105.879	106.321	109.1	70.4319	151.749	139.203	71.0313	91.2666	74.5195	87.8544	251.874	225.997	203.805	234.739	126.907	275.803	96.9156	0	0		0.253592	0.191975	0.0979458	0.241985	0.370313	0.198801
63.4	2.69185	85.6018	102.396	106.321	109.1	70.4319	144.537	131.292	71.0313	88.3028	74.5195	87.838	238.599	223.378	196.473	221.952	121.313	266.677	96.8975	0	0		0.240858	0.187866	0.0918319	0.235517	0.36547	0.192721
63.5	2.68022	85.6018	99.3832	106.321	109.1	70.4319	137.481	123.891	71.0313	86.0908	74.5195	87.8217	225.329	220.153	189.614	209.17	116.956	256.693	96.8795	0	0		0.227481	0.182403	0.0838831	0.227912	0.358594	0.18541
63.6	2.66865	85.6018	96.8574	106.321	109.1	70.4319	130.726	117.131	71.0313	84.5036	74.5195	87.8054	212.348	216.316	183.349	196.666	113.7	246.029	96.8616	0	0		0.213746	0.175738	0.0741699	0.219263	0.349789	0.176946
63.7	2.65715	85.6018	94.813	106.321	109.1	70.4319	124.407	111.116	71.0313	83.3847	74.5195	87.7892	199.925	211.888	177.772	184.701	111.359	234.895	96.8437	0	0		0.199955	0.168099	0.0628588	0.209722	0.339274	0.16747
63.8	2.64575	85.6018	93.2217	106.321	109.1	70.4319	118.636	105.912	71.0313	82.5559	74.5195	87.773	188.304	206.919	172.945	173.508	109.703	223.521	96.8258	0	0		0.186414	0.159781	0.0502172	0.199505	0.327386	0.157186
63.9	2.63446	85.6018	92.0341	106.321	109.1	70.4319	113.5	101.55	71.0313	81.8253	74.5195	87.7568	177.693	201.483	168.895	163.287	108.472	212.152	96.808	0	0		0.173409	0.151133	0.0366097	0.188885	0.314573	0.146355
64	2.6233	85.6018	91.1819	106.321	109.1	70.4319	109.057	98.0191	71.0313	81.8253	74.5195	87.7407	168.25	195.678	165.612	154.192	107.384	201.03	96.7902	0	0		0.160414	0.141783	0.0224846	0.178178	0.300659	0.134821
64.1	2.61227	85.6018	90.5811	106.321	109.1	70.4319	105.333	95.2707	71.0313	81.8253	74.5195	87.7246	160.08	189.618	163.051	146.323	107.364	190.386	96.7724	0	0		0.148948	0.132604	0.00834879	0.167724	0.286693	0.123714
64.2	2.6014	85.6018	90.1361	106.321	109.1	70.4319	102.318	93.2195	71.0313	81.8253	74.5195	87.7086	153.228	183.428	161.133	139.724	107.345	180.43	96.7547	0	0		0.138463	0.123806	-0.00526679	0.15786	0.273142	0.112948
64.3	2.5907	85.6018	89.7439	106.321	109.1	70.4319	99.9715	91.7476	71.0313	81.8253	74.5195	87.6926	147.679	177.24	159.749	134.38	107.325	171.338	96.7371	0	0		0.129049	0.115576	-0.0178476	0.148893	0.26046	0.102856
64.4	2.58018	85.6018	89.7439	106.321	109.1	70.4319	98.2202	90.71	71.0313	81.8253	74.5195	87.6766	143.356	171.186	158.765	130.217	107.306	163.247	96.7195	0	0		0.120726	0.108062	-0.0293644	0.140624	0.248646	0.0934759
64.5	2.56988	85.6018	89.7439	106.321	109.1	70.4319	96.9635	89.9415	71.0313	81.8253	74.5195	87.6607	140.124	165.392	158.029	127.105	107.286	156.246	96.7019	0	0		0.113443	0.10136	-0.0391798	0.133507	0.238271	0.0851946
64.6	2.55979	85.6018	89.7439	106.321	109.1	70.4319	96.0776	89.2639	71.0313	81.8253	74.5195	87.6448	137.798	159.972	157.377	124.866	107.267	150.374	96.6844	0	0		0.107076	0.0955096	-0.0471474	0.127517	0.229442	0.0780985
64.7	2.54993	85.6018	89.7439	106.321	109.1	70.4319	95.4214	89.2639	71.0313	81.8253	74.5195	87.629	136.152	155.021	157.348	123.282	107.247	145.618	96.6669	0	0		0.101983	0.0903211	-0.0539867	0.123103	0.221851	0.0720981
64.8	2.54033	85.6018	89.7439	106.321	109.1	70.4319	94.8429	89.2639	71.0313	81.8253	74.5195	87.6132	134.927	150.614	157.32	122.103	107.228	141.912	96.6495	0	0		0.0975812	0.085837	-0.0593245	0.119727	0.215564	0.0671734
64.9	2.531	85.6018	89.7439	106.321	109.1	70.4319	94.8429	89.2639	71.0313	81.8253	74.5195	87.5974	133.844	146.799	157.292	121.062	107.209	139.14	96.6321	0	0		0.0937124	0.0818957	-0.0635415	0.116596	0.210276	0.06277
65	2.52195	85.6018	89.7439	106.321	109.1	70.4319	94.8429	89.2639	71.0313	81.8253	74.5195	87.5817	133.82	143.598	157.263	121.04	107.19	137.145	96.6148	0	0		0.0911294	0.0792649	-0.0657814	0.114923	0.207047	0.0600836
65.1	2.51321	85.6018	89.7439	106.321	109.1	70.4319	94.8429	89.2639	71.0313	81.8253	74.5195	87.566	133.797	141.003	157.235	121.018	107.17	135.732	96.5975	0	0		0.0890118	0.0771082	-0.0673917	0.113714	0.204527	0.0579864
65.2	2.50477	85.6018	89.7439	106.321	109.1	70.4319	94.8429	89.2639	71.0313	81.8253	74.5195	87.5504	133.773	138.979	157.207	120.997	107.151	134.679	96.5802	0	0		0.0873377	0.0754034	-0.0686103	0.112794	0.202568	0.0563551
65.3	2.49667	85.6018	89.7439	106.321	109.1	70.4319	94.8429	89.2639	71.0313	81.8253	74.5195	87.5348	133.749	137.462	157.179	120.975	107.132	133.749	96.563	0	0		0.0860624	0.0741051	-0.0696967	0.111972	0.200992	0.0550408
65.4	2.48891	85.6018	89.7439	106.321	109.1	70.4319	94.8429	89.2639	71.0313	81.8253	74.5195	87.5192	133.725	136.367	157.151	120.953	107.113	133.725	96.5458	0	0		0.0851205	0.0731467	-0.0697852	0.111884	0.20024	0.0544041
65.5	2.48151	85.6018	89.7439	106.321	109.1	70.4319	94.8429	89.2639	71.0313	81.8253	74.5195	87.5037	133.701	135.588	157.123	120.932	107.094	133.701	96.5287	0	0		0.0844297	0.0724442	-0.0698735	0.111797	0.199683	0.0539289
65.6	2.47448	85.6018	89.7439	106.321	109.1	70.4319	94.8429	89.2639	71.0313	81.8253	74.5195	87.4882	133.678	135.006	157.096	120.911	107.075	133.678	96.5116	0	0		0.0838949	0.0719006	-0.0699616	0.111709	0.199249	0.053554
65.7	2.46784	85.6018	89.7439	106.321	109.37	70.4319	94.8429	89.2639	71.0313	81.8253	74.5195	87.4727	133.654	134.489	157.068	120.889	107.056	133.654	96.4946	0	0		0.083158	0.0711572	-0.0703073	0.111622	0.198856	0.0530593
65.8	2.4616	85.6018	89.7439	106.321	109.675	70.4319	94.8429	89.2639	71.0313	81.8253	74.5195	87.4573	133.63	134.466	157.04	120.868	107.037	133.63	96.4776	0	0		0.0827815	0.070782	-0.0706873	0.111535	0.198772	0.0527971
65.9	2.45578	85.6018	89.7439	106.321	110.087	70.4319	94.8429	89.2639	71.0313	81.8253	74.5195	87.4419	133.607	134.442	157.013	120.847	107.018	133.607	96.4606	0	0		0.0823044	0.0703067	-0.0711691	0.111448	0.198687	0.0524741
66	2.45039	85.6018	89.7439	106.321	110.672	70.4319	94.8429	89.2639	71.0313	81.8253	74.5195	87.4266	133.584	134.418	156.985	120.826	107	133.584	96.4437	0	0		0.0816647	0.0696697	-0.0718152	0.111362	0.198603	0.0520531
66.1	2.44545	85.6018	89.7439	106.321	111.487	70.4319	94.8429	89.2639	71.0313	81.8253	74.5195	87.4113	133.56	134.395	156.958	120.804	106.981	133.56	96.4268	0	0		0.0808087	0.0688174	-0.0726799	0.111275	0.198519	0.0515012
66.2	2.44096	85.6018	89.7439	106.321	112.579	70.4319	94.8429	89.2639	71.0313	81.8253	74.5195	87.3961	133.537	134.371	156.93	120.783	106.962	133.537	96.41	0	0		0.0796931	0.0677069	-0.0738066	0.111189	0.198435	0.0507922
66.3	2.43694	85.6018	89.7439	106.321	113.982	70.4319	94.8429	89.2639	71.0313	81.8253	74.5195	87.3808	133.514	134.348	156.903	120.762	106.944	133.514	96.3932	0	0		0.0782876	0.066308	-0.0752259	0.111103	0.198352	0.0499074
66.4	2.4334	85.6018	89.7439	106.612	115.715	70.4319	94.8429	89.2639	71.0313	81.8253	74.5195	87.3657	133.49	134.325	156.876	120.741	106.925	133.49	96.3765	0	0		0.0763034	0.0643335	-0.0769533	0.111017	0.197995	0.0486714
66.5	2.43035	85.6018	89.7439	106.943	117.782	70.4319	94.8429	89.2639	71.0313	81.8253	74.5195	87.3505	133.467	134.301	156.848	120.72	106.907	133.467	96.3598	0	0		0.073978	0.0620195	-0.0789893	0.110932	0.197602	0.0472268
66.6	2.42781	85.6018	89.7439	107.389	120.172	70.4319	94.8429	89.2639	71.0313	81.8253	74.5195	87.3354	133.444	134.278	156.821	120.699	106.888	133.444	96.3431	0	0		0.0712555	0.0593107	-0.081319	0.110846	0.197102	0.0455387
66.7	2.42579	85.6018	89.7439	108.022	122.858	70.4319	94.8429	89.2639	71.0313	81.8253	74.5195	87.3203	133.421	134.255	156.794	120.679	106.87	133.421	96.3265	0	0		0.0681011	0.0561722	-0.083913	0.110761	0.196427	0.0435846
66.8	2.42429	85.6018	89.7439	108.904	125.798	70.4319	94.8429	89.2639	71.0313	81.8253	74.5195	87.3053	133.398	134.232	156.767	120.658	106.851	133.398	96.3099	0	0		0.0645022	0.0525918	-0.0867293	0.110676	0.19552	0.041355
66.9	2.42332	85.6018	89.7439	110.086	128.942	70.4319	94.8429	89.2639	71.0313	81.8253	74.5195	87.2903	133.375	134.209	156.74	120.637	106.833	133.375	96.2934	0	0		0.0604695	0.04858	-0.0897155	0.110591	0.194336	0.0388545
67	2.42289	85.6018	89.7439	111.605	132.225	70.4319	94.8429	89.2639	71.0313	81.8253	74.5195	87.2754	133.352	134.186	156.713	120.617	106.815	133.352	96.2769	0	0		0.0560357	0.0441694	-0.0928115	0.110506	0.19284	0.0361008
67.1	2.42302	85.6018	89.7439	113.481	135.581	70.4319	94.8429	89.2639	71.0313	81.8253	74.5195	87.2604	133.33	134.163	156.687	120.596	106.796	133.33	96.2604	0	0		0.0512535	0.0394126	-0.0959527	0.110422	0.191017	0.0331242
67.2	2.4237	85.6018	89.7439	115.719	138.937	70.4319	94.8429	89.2639	71.0313	81.8253	74.5195	87.2456	133.307	134.14	156.66	120.575	106.778	133.307	96.244	0	0		0.0461926	0.0343789	-0.099073	0.110338	0.188864	0.0299657
67.3	2.42494	85.6018	89.7439	118.306	142.22	70.4319	94.8429	89.2639	71.0313	81.8253	74.5195	87.2307	133.284	134.117	156.633	120.555	106.76	133.284	96.2276	0	0		0.0409358	0.0291506	-0.102108	0.110254	0.186398	0.0266747
67.4	2.42676	85.6018	89.7439	121.213	145.364	70.4319	94.8429	89.2639	71.0313	81.8253	74.5195	87.2159	133.262	134.094	156.607	120.534	106.742	133.262	96.2113	0	0		0.0355741	0.0238184	-0.104999	0.11017	0.183648	0.0233066
67.5	2.42915	85.6018	89.7439	124.396	148.304	70.4319	94.8429	89.2639	71.0313	81.8253	74.5195	87.2011	133.239	134.072	156.58	120.514	106.724	133.239	96.195	0	0		0.0302025	0.0184767	-0.107693	0.110086	0.180658	0.0199201
67.6	2.43213	85.6018	89.7439	127.799	150.99	70.4319	94.8429	89.2639	71.0313	81.8253	74.5195	87.1864	133.217	134.049	156.554	120.494	106.706	133.217	96.1787	0	0		0.0249153	0.0132192	-0.110146	0.110003	0.177484	0.0165741
67.7	2.4357	85.6018	89.7439	131.353	153.38	70.4319	94.8429	89.2639	71.0313	81.8253	74.5195	87.1717	133.194	134.027	156.527	120.473	106.688	133.194	96.1625	0	0		0.0198014	0.00813436	-0.112328	0.10992	0.174189	0.0133253
67.8	2.43986	85.6018	89.7439	134.986	155.447	70.4319	94.8429	89.2639	71.0313	81.8253	74.5195	87.1571	133.172	134.004	156.501	120.453	106.67	133.172	96.1464	0	0		0.0149408	0.0033016	-0.114219	0.109836	0.170841	0.0102254
67.9	2.44462	85.6018	89.7439	138.618	157.18	70.4319	94.8429	89.2639	71.0313	81.8253	74.5195	87.1424	133.149	133.981	156.475	120.433	106.652	133.149	96.1302	0	0		0.0104012	-0.00121185	-0.115811	0.109754	0.167511	0.00731878
68	2.44998	85.6018	89.7439	142.173	158.583	70.4319	94.8429	89.2639	71.0313	81.8253	74.5195	87.1279	133.127	133.959	156.449	120.413	106.634	133.127	96.1141	0	0		0.00623528	-0.00535351	-0.117112	0.109671	0.164269	0.00464109
68.1	2.45595	85.6018	89.7439	145.575	159.675	70.4319	94.8429	89.2639	71.0313	81.8253	74.5195	87.1133	133.105	133.937	156.422	120.393	106.616	133.105	96.0981	0	0		0.00247926	-0.00908755	-0.11814	0.109588	0.161178	0.0022174
68.2	2.46252	85.6018	89.7439	148.758	160.49	70.4319	94.8429	89.2639	71.0313	81.8253	74.5195	87.0988	133.083	133.914	156.396	120.372	106.599	133.083	96.0821	0	0		-0.000848582	-0.0123958	-0.118926	0.109506	0.158295	6.14513e-05
68.3	2.4697	85.6018	89.7439	151.666	161.075	70.4319	94.8429	89.2639	71.0313	81.8253	74.5195	87.0843	133.061	133.892	156.37	120.352	106.581	133.061	96.0661	0	0		-0.00374824	-0.0152784	-0.119513	0.109424	0.155667	-0.00182484
68.4	2.47749	85.6018	89.7439	154.252	161.487	70.4319	94.8429	89.2639	71.0313	81.8253	74.5195	87.0699	133.038	133.87	156.344	120.333	106.563	133.038	96.0502	0	0		-0.00623768	-0.0177532	-0.11995	0.109342	0.153328	-0.00345135
68.5	2.48588	85.6018	89.7439	156.49	161.793	70.4319	94.8429	89.2639	71.0313	81.8253	74.5195	87.0555	133.016	133.848	156.851	120.313	106.545	133.016	96.0343	0	0		-0.00792019	-0.0194159	-0.120295	0.109695	0.151643	-0.00456357
68.6	2.49487	85.6018	89.7439	158.367	162.062	70.4319	94.8429	89.2639	71.0313	81.8253	74.5195	87.0411	132.994	133.826	157.43	120.293	106.528	132.994	96.0184	0	0		-0.00922061	-0.0206975	-0.120608	0.110106	0.150323	-0.00543183
68.7	2.50445	85.6018	89.7439	159.885	162.062	70.4319	94.8429	89.2639	71.0313	81.8253	74.5195	87.0268	132.973	133.804	158.22	120.273	106.51	132.973	96.0026	0	0		-0.00984806	-0.0213064	-0.120689	0.110689	0.149451	-0.00586851
68.8	2.51464	85.6018	89.7439	161.067	162.062	70.4319	94.8429	89.2639	71.0313	81.8253	74.5195	87.0125	132.951	133.782	159.351	120.253	106.493	132.951	95.9868	0	0		-0.00993155	-0.0213683	-0.12077	0.111548	0.14909	-0.0059563
68.9	2.52541	85.6018	89.7439	161.949	162.062	70.4319	94.8429	89.2639	71.0313	81.8253	74.5195	86.9982	132.929	133.76	160.937	120.233	106.475	132.929	95.9711	0	0		-0.00941134	-0.0208219	-0.120851	0.112774	0.149278	-0.0056564
69	2.53676	85.6018	89.7439	162.582	162.062	70.4319	94.8429	89.2639	71.0313	81.8253	74.5195	86.984	132.907	133.738	163.071	120.214	106.458	132.907	95.9554	0	0		-0.00825691	-0.0196352	-0.120932	0.114439	0.150027	-0.00494855
69.1	2.54869	85.9523	89.7439	163.029	162.062	70.4319	94.8429	89.2639	71.0313	81.8253	74.5195	86.9698	132.886	133.716	165.819	120.194	106.441	132.886	95.9398	0	0		-0.00674532	-0.0178078	-0.121314	0.116236	0.151323	-0.00401056
69.2	2.56118	86.3499	89.7439	163.359	162.062	70.4319	94.8429	89.2639	71.0313	81.8253	74.5195	86.9556	132.864	133.694	169.219	120.175	106.423	132.864	95.9242	0	0		-0.00466927	-0.0153714	-0.121736	0.118495	0.153122	-0.00270728
69.3	2.57424	86.8866	89.7439	163.651	162.062	70.4319	94.8429	89.2639	71.0313	81.8253	74.5195	86.9415	132.842	133.673	173.279	120.155	106.406	132.842	95.9086	0	0		-0.00216371	-0.0123883	-0.122277	0.121123	0.155359	-0.00112392
69.4	2.58784	87.6481	89.7439	163.651	162.062	70.4319	94.8429	89.2639	71.0313	81.8253	74.5195	86.9274	132.821	133.651	177.975	120.136	106.389	132.821	95.893	0	0		0.000874515	-0.00868974	-0.12301	0.124002	0.158227	0.000808371
69.5	2.60198	88.7091	89.7439	163.651	162.062	70.4319	94.8429	89.2639	71.0313	81.8253	74.5195	86.9134	132.799	133.629	183.255	120.116	106.372	132.799	95.8775	0	0		0.00410586	-0.00455685	-0.123999	0.127007	0.161435	0.00287244
69.6	2.61666	90.1309	89.7439	163.651	162.062	70.4319	94.8429	89.2639	71.0313	81.8253	74.5195	86.8994	132.778	133.608	189.036	120.097	106.354	132.778	95.8621	0	0		0.00741108	-6.37292e-05	-0.125293	0.130005	0.164926	0.00499303
69.7	2.63184	91.9575	89.7439	163.651	162.062	70.4319	94.8429	89.2639	71.0313	81.8253	74.5195	86.8854	132.757	133.586	195.216	120.078	106.337	132.757	95.8467	0	0		0.0106685	0.00469879	-0.126928	0.132866	0.16863	0.00709264
69.8	2.64753	94.2142	89.7439	163.651	162.062	70.4319	94.8429	89.2639	71.0313	81.8253	74.5195	86.8714	132.735	133.565	201.672	120.058	106.32	132.735	95.8313	0	0		0.0137605	0.00962819	-0.128921	0.135469	0.172467	0.00909553
69.9	2.6637	96.9059	89.7439	163.651	162.062	70.4319	94.8429	89.2639	71.0313	81.8253	74.5195	86.8575	132.714	133.543	208.268	120.039	106.303	132.714	95.8159	0	0		0.0165801	0.0146157	-0.131273	0.137708	0.176352	0.0109316
70	2.68035	100.018	89.7439	163.651	162.062	70.4319	94.8429	89.2639	71.0313	81.8253	74.5195	86.8437	132.693	133.522	214.862	120.02	106.286	132.693	95.8006	0	0		0.0190355	0.0195519	-0.133964	0.139499	0.1802	0.0125396
70.1	2.69745	103.514	89.7439	163.651	162.062	70.4319	94.8429	89.2639	71.0313	81.8253	74.5195	86.8298	133.372	133.501	221.311	120.001	106.269	132.672	95.7854	0	0		0.0215685	0.0248532	-0.136193	0.141294	0.184337	0.0142102
70.2	2.71498	107.343	89.7439	163.651	162.062	70.4319	94.8429	89.2639	71.0313	81.8253	74.5195	87.7845	134.144	133.48	227.482	119.982	106.252	132.651	95.7701	0	0		0.0243769	0.0306742	-0.13752	0.143301	0.188885	0.0160758
70.3	2.73292	111.436	89.7439	163.651	162.062	70.4319	94.8429	89.2639	71.0313	81.8253	74.5195	88.869	135.195	133.458	233.25	119.963	106.236	132.63	95.7549	0	0		0.0269415	0.0364304	-0.138608	0.145022	0.193385	0.0177924
70.4	2.75126	115.711	89.7439	163.651	162.062	70.4319	94.8429	89.2639	71.0313	81.8253	74.5195	90.3376	136.693	133.437	238.514	119.944	106.219	132.609	95.7398	0	0		0.0295556	0.0423537	-0.138935	0.146766	0.19802	0.0195543
70.5	2.76996	120.08	89.7439	163.651	162.062	70.4319	94.8429	89.2639	71.0313	81.8253	74.5195	92.4263	138.789	133.416	243.192	119.925	106.202	133.323	95.7247	0	0		0.0324955	0.0486534	-0.137247	0.149338	0.203365	0.0218927
70.6	2.789	124.45	89.7439	163.651	162.062	70.4319	94.8429	89.2639	71.0313	81.8253	74.5195	95.3419	141.604	133.395	247.233	119.906	106.185	134.136	95.7096	0	0		0.036007	0.0555061	-0.133856	0.152541	0.209192	0.0246692
70.7	2.80836	128.725	90.3617	163.651	162.062	70.4319	95.4348	89.2639	71.0313	81.8253	74.5195	99.2526	145.226	134.162	250.613	119.887	106.169	135.24	95.6946	0	0		0.0408286	0.0635879	-0.128782	0.155605	0.215616	0.027886
70.8	2.828	132.818	91.0625	163.651	162.062	70.4319	96.1063	89.2639	71.0313	81.8253	75.1753	104.28	149.705	135.035	253.341	119.868	106.152	136.815	95.6796	0	0		0.0466283	0.0724949	-0.121792	0.159188	0.222313	0.0316022
70.9	2.84791	136.646	92.0086	163.651	162.312	70.4319	97.0127	89.2639	71.0313	81.8253	75.9194	110.492	155.051	136.22	255.455	120.501	106.135	139.018	95.6646	0	0		0.0534448	0.0821955	-0.112609	0.163721	0.230159	0.0363349
71	2.86805	140.143	93.3508	163.651	162.596	71.1757	98.2985	89.2639	71.0313	81.8253	76.9239	117.903	161.232	137.909	257.022	121.221	106.119	141.976	96.5358	0	0		0.061038	0.0929402	-0.100492	0.168789	0.238694	0.0418884
71.1	2.88838	143.255	95.2212	163.651	162.979	72.0196	100.09	89.8577	71.0313	81.8253	78.3487	126.471	168.179	140.271	258.135	122.2	106.102	145.782	97.5259	0	0		0.0698816	0.104207	-0.0871633	0.174127	0.247313	0.0478587
71.2	2.9089	145.947	97.7274	163.651	163.523	73.1587	102.492	90.5312	71.0313	82.4833	80.3345	136.098	175.786	143.443	258.907	123.596	106.901	150.488	98.8674	0	0		0.0797817	0.115764	-0.072587	0.179357	0.255743	0.0543977
71.3	2.92955	148.203	100.947	163.651	164.28	74.7747	105.576	91.4404	71.6684	83.2298	82.9952	146.639	183.916	147.523	259.469	125.549	107.81	156.103	100.776	0	0		0.0899643	0.127257	-0.0578201	0.183596	0.263628	0.060927
71.4	2.95032	150.03	104.925	163.651	165.295	77.0267	109.387	92.7303	72.3912	84.2376	86.4135	157.904	192.409	152.567	259.959	128.171	109.042	162.597	103.442	0	0		0.100503	0.138635	-0.0430342	0.187023	0.270971	0.0674496
71.5	2.97117	151.452	109.67	163.935	166.6	80.0443	113.933	94.5278	73.3668	85.6672	90.6365	169.67	201.085	158.586	259.919	131.544	110.796	169.895	107.018	0	0		0.110412	0.148766	-0.0289256	0.188961	0.27679	0.0732797
71.6	2.99208	152.513	115.155	164.258	168.211	83.921	119.188	96.9363	74.7509	87.6594	95.6739	181.69	209.759	165.547	259.879	135.715	113.246	177.886	111.615	0	0		0.119661	0.157555	-0.0161019	0.189395	0.281059	0.0784024
71.7	3.01301	153.274	121.318	164.694	170.133	88.7104	125.093	100.031	76.6797	90.3289	101.497	193.707	218.244	173.369	259.839	140.693	116.535	186.427	117.298	0	0		0.127747	0.164474	-0.00504395	0.18814	0.283404	0.0825111
71.8	3.03393	153.811	128.068	165.312	172.354	94.4233	131.559	103.853	79.2642	93.7584	108.041	205.462	226.362	181.934	259.799	146.449	120.763	195.349	124.077	0	0		0.134264	0.169149	0.00391488	0.185137	0.28361	0.0853893
71.9	3.05483	154.208	135.282	166.173	174.851	101.027	138.47	108.413	82.5846	97.9954	115.206	216.71	233.952	191.089	259.76	152.918	125.99	204.464	131.915	0	0		0.138921	0.171372	0.0105905	0.180438	0.281611	0.0869166
72	3.07568	154.559	142.818	167.328	177.585	108.449	145.691	113.685	86.6867	103.049	122.865	227.227	240.879	200.651	259.72	160.001	132.226	213.576	140.722	0	0		0.141548	0.171096	0.0149365	0.174185	0.277472	0.0870644
72.1	3.09644	154.559	150.52	168.811	180.507	116.575	153.069	119.608	91.5798	108.892	130.866	236.826	247.037	210.42	259.681	167.572	139.437	222.489	150.365	0	0		0.142337	0.168416	0.0172638	0.166824	0.271366	0.0860278
72.2	3.1171	154.559	158.221	170.643	183.559	125.261	160.448	126.094	97.2362	115.457	139.042	245.362	252.358	220.187	259.641	175.48	147.54	231.017	160.67	0	0		0.141177	0.163544	0.0175589	0.158422	0.263542	0.0838146
72.3	3.13763	154.559	165.758	172.828	186.679	134.335	167.668	133.027	103.592	122.646	147.219	252.739	256.811	229.74	259.602	183.56	156.411	238.991	171.435	0	0		0.138262	0.156773	0.016093	0.149288	0.254299	0.0806083
72.4	3.15801	154.559	172.972	175.355	189.798	143.608	174.58	140.27	110.552	130.33	155.22	258.915	260.407	238.881	259.563	191.637	165.893	246.268	182.432	0	0		0.133848	0.148454	0.0131722	0.139728	0.243967	0.0766141
72.5	3.17821	154.559	179.721	178.194	192.851	152.881	181.046	147.671	117.992	138.357	162.879	263.905	263.196	247.427	259.524	199.538	175.797	252.738	193.426	0	0		0.128232	0.138967	0.0091205	0.130032	0.232883	0.072046
72.6	3.19822	154.559	185.885	181.302	195.773	161.955	186.951	155.073	125.764	146.56	170.044	267.78	265.268	255.227	259.733	207.097	185.915	258.328	204.181	0	0		0.121832	0.128802	0.00426643	0.12057	0.221465	0.0671817
72.7	3.21801	154.559	191.37	184.625	198.507	170.641	192.206	162.316	133.706	154.764	176.588	270.66	266.742	262.162	259.976	214.166	196.031	263.006	214.471	0	0		0.114888	0.118256	-0.00106531	0.111506	0.209972	0.0621669
72.8	3.23757	154.559	196.115	188.096	201.003	178.767	196.751	169.248	141.648	162.791	182.411	272.715	267.77	268.154	260.317	220.616	205.926	266.785	224.093	0	0		0.107752	0.107725	-0.00656015	0.10309	0.198735	0.0572112
72.9	3.25688	154.559	200.092	191.643	203.225	186.188	200.562	175.734	149.42	170.475	187.448	274.152	268.521	273.169	260.818	226.351	215.394	269.716	232.875	0	0		0.100761	0.0975802	-0.0119182	0.0955442	0.188066	0.0525075
73	3.27591	154.559	203.312	195.191	205.147	192.792	203.647	181.658	156.86	177.664	191.671	275.205	269.177	277.22	261.531	231.306	224.246	271.893	240.683	0	0		0.0942285	0.0881604	-0.016858	0.089062	0.178252	0.0482303
73.1	3.29466	154.559	205.818	198.662	206.758	198.505	206.048	186.929	163.82	184.229	195.09	276.128	269.137	280.363	262.5	235.453	232.326	273.444	247.432	0	0		0.0881428	0.0794746	-0.0214915	0.0835075	0.169308	0.044344
73.2	3.3131	154.559	207.689	201.985	208.062	203.295	207.84	191.489	170.176	190.072	197.75	276.087	269.098	282.698	263.754	238.803	239.51	274.524	253.082	0	0		0.0825437	0.0715758	-0.0258495	0.0787926	0.161282	0.0408488
73.3	3.33124	154.559	209.031	205.093	209.077	207.171	209.126	195.312	175.832	195.126	199.736	276.046	269.058	284.361	265.314	241.401	245.718	275.314	257.646	0	0		0.0778491	0.0648863	-0.029475	0.0752043	0.154521	0.0379874
73.4	3.34904	154.559	209.977	207.932	209.835	210.189	210.032	198.406	180.725	199.363	201.161	276.006	269.018	285.52	267.181	243.331	250.916	276.006	261.19	0	0		0.0740819	0.0594321	-0.0323859	0.0726365	0.149042	0.0357518
73.5	3.3665	154.559	210.678	210.459	210.378	212.441	210.704	200.815	184.827	202.792	202.165	275.965	268.979	286.368	269.345	244.705	255.114	275.965	263.824	0	0		0.0712359	0.0552042	-0.0350018	0.070649	0.144575	0.0339238
73.6	3.38361	154.559	211.296	212.644	210.762	214.057	211.296	202.612	188.148	205.462	202.909	275.924	268.939	287.111	271.78	245.663	258.373	275.924	265.703	0	0		0.0692753	0.0521576	-0.03713	0.0692795	0.141227	0.0325894
73.7	3.40037	154.559	211.296	214.476	211.045	215.196	211.296	203.902	190.732	207.454	203.565	275.884	268.9	287.069	274.451	246.364	260.795	275.884	267.016	0	0		0.0678114	0.0498879	-0.038632	0.0688527	0.138856	0.0317808
73.8	3.41675	154.559	211.296	215.959	211.296	216.04	211.296	204.811	192.661	208.883	203.565	275.844	268.86	287.027	277.307	246.976	262.522	275.844	267.978	0	0		0.0669638	0.0484892	-0.039556	0.0690406	0.137566	0.031481
73.9	3.43276	154.559	211.296	217.113	211.296	216.784	211.296	205.485	194.045	209.891	203.565	275.804	268.821	286.985	280.292	246.94	263.727	275.804	268.821	0	0		0.0666612	0.0478529	-0.0400953	0.0695005	0.136733	0.0313773
74	3.44839	154.559	211.296	217.975	211.296	216.784	211.296	206.078	195.021	210.638	203.565	275.763	268.98	286.943	283.342	246.904	264.61	275.763	268.782	0	0		0.067043	0.0477057	-0.0407405	0.0702146	0.136394	0.0314952
74.1	3.46363	154.559	211.296	218.593	211.296	216.784	211.296	206.078	195.744	211.296	203.565	275.705	269.166	286.901	286.392	246.869	265.384	275.723	268.743	0	0		0.0676272	0.0480285	-0.0410234	0.0710348	0.136522	0.0318778
74.2	3.47848	154.559	211.296	219.029	211.296	216.784	211.296	206.078	196.381	211.296	203.565	275.645	269.43	286.86	289.375	246.833	265.345	275.684	268.704	0	0		0.0683017	0.0487198	-0.041235	0.0718917	0.137017	0.0323019
74.3	3.49292	154.559	211.296	219.352	211.296	216.784	211.296	206.078	196.381	211.296	203.565	275.578	269.821	286.818	292.227	246.797	265.307	275.644	268.665	0	0		0.0692789	0.0497018	-0.0411227	0.0730078	0.137802	0.0329064
74.4	3.50697	154.559	211.296	219.636	211.296	216.784	211.296	206.078	196.381	211.296	203.565	275.499	270.381	286.777	294.892	246.762	265.269	275.604	268.627	0	0		0.0702587	0.050686	-0.0409381	0.0741108	0.138592	0.0335127
74.5	3.52062	154.952	211.296	219.636	211.296	216.784	211.296	206.078	196.381	211.296	203.565	275.405	271.145	286.819	297.322	246.726	265.231	275.564	268.588	0	0		0.0712046	0.0517931	-0.0408329	0.0750307	0.139503	0.0340999
74.6	3.53386	155.397	211.4	219.636	211.296	216.784	211.338	206.078	196.381	211.296	203.565	275.293	272.137	286.873	299.479	246.691	265.193	275.525	268.55	0	0		0.0721079	0.0528793	-0.0406981	0.0758427	0.140355	0.0346258
74.7	3.54669	155.999	211.519	219.636	211.296	216.784	211.386	206.078	196.381	211.296	203.565	275.16	273.371	286.959	301.339	246.656	265.155	275.485	268.511	0	0		0.0729298	0.0539481	-0.0405335	0.0765527	0.141188	0.0350983
74.8	3.55912	156.852	211.678	219.636	211.309	216.784	211.451	206.078	196.381	211.296	203.565	275.005	274.851	287.099	302.89	246.62	265.117	275.446	268.473	0	0		0.0736295	0.0549981	-0.0403964	0.0771019	0.141993	0.0354839
74.9	3.57113	158.041	211.905	219.636	211.325	216.798	211.543	206.078	196.381	211.296	203.647	274.828	276.568	287.31	304.138	246.585	265.079	275.407	268.435	0	0		0.0741762	0.0560327	-0.0403662	0.0773993	0.142733	0.0357358
75	3.58274	159.635	212.221	219.636	211.346	216.815	211.672	206.078	196.381	211.296	203.74	274.63	278.501	287.607	305.099	246.55	265.042	275.368	268.414	0	0		0.074551	0.0570664	-0.0404532	0.0774451	0.143431	0.0358564
75.1	3.59394	161.682	212.645	219.636	211.376	216.837	211.843	206.162	196.381	211.296	203.865	274.412	280.621	288	305.806	246.515	265.004	275.329	268.396	0	0		0.0747361	0.0580628	-0.0407501	0.077195	0.144042	0.0358003
75.2	3.60474	164.211	213.189	219.636	211.418	216.869	212.064	206.257	196.381	211.338	204.042	274.177	282.889	288.495	306.3	246.724	265.076	275.29	268.385	0	0		0.0747442	0.0590374	-0.0412662	0.0766262	0.14464	0.0356414
75.3	3.61513	167.227	213.861	219.651	211.474	216.912	212.337	206.386	196.381	211.386	204.29	273.929	285.26	289.093	306.636	246.966	265.162	275.251	268.385	0	0		0.0745517	0.0599937	-0.0420394	0.0757315	0.145158	0.0353057
75.4	3.62511	170.714	214.663	219.668	211.545	216.971	212.663	206.568	196.381	211.451	204.621	273.672	287.683	289.791	306.874	247.304	265.292	275.212	268.4	0	0		0.0741799	0.0609276	-0.0430947	0.0745197	0.145603	0.034813
75.5	3.63468	174.633	215.59	219.691	211.634	217.047	213.039	206.821	196.43	211.543	205.047	273.41	290.105	290.58	307.078	247.798	265.492	275.174	268.433	0	0		0.0736316	0.0618098	-0.0444631	0.072995	0.145962	0.0341747
75.6	3.64385	178.924	216.632	219.723	211.74	217.14	213.462	207.161	196.486	211.672	205.572	273.148	292.475	291.447	307.035	248.5	265.785	275.135	268.487	0	0		0.0728568	0.0625509	-0.0461231	0.0711147	0.146179	0.0333679
75.7	3.6526	183.511	217.772	219.768	211.862	217.251	213.925	207.598	196.561	211.843	206.2	272.891	294.74	292.377	306.992	249.453	266.191	275.097	268.562	0	0		0.0719502	0.0632034	-0.048062	0.0689882	0.146311	0.0324653
75.8	3.66095	188.302	218.992	219.829	211.999	217.38	214.42	208.138	196.668	212.064	206.925	272.644	296.856	293.351	306.949	250.687	266.722	275.058	268.658	0	0		0.0709264	0.0637372	-0.0502539	0.0666496	0.146351	0.0314884
75.9	3.66887	193.199	220.265	219.906	212.15	217.525	214.937	208.781	196.818	212.337	207.74	272.41	298.785	294.346	306.906	252.219	267.387	275.02	268.776	0	0		0.0698056	0.0641282	-0.0526611	0.0641427	0.146294	0.0304623
76	3.67638	198.095	221.567	220.002	212.311	217.683	215.466	209.525	197.018	212.663	208.632	272.194	300.496	295.341	306.864	254.053	268.188	274.982	268.913	0	0		0.0686121	0.064359	-0.0552358	0.0615187	0.14614	0.0294141
76.1	3.68346	202.887	222.869	220.116	212.478	217.852	215.994	210.361	197.275	213.039	209.586	271.997	301.971	296.314	306.821	256.177	269.119	274.944	269.067	0	0		0.0673738	0.0644197	-0.0579234	0.0588336	0.145894	0.0283716
76.2	3.69011	207.473	224.142	220.248	212.65	218.029	216.512	211.276	197.592	213.462	210.583	271.822	303.2	297.243	306.779	258.569	270.17	274.906	269.233	0	0		0.06612	0.0643087	-0.0606643	0.0561459	0.145565	0.0273624
76.3	3.69632	211.764	225.361	220.397	212.822	218.21	217.007	212.255	197.97	213.925	211.601	271.669	304.187	298.109	306.737	261.19	271.324	274.868	269.409	0	0		0.0648807	0.064032	-0.0633974	0.0535134	0.145167	0.0264119
76.4	3.7021	215.683	226.502	220.56	212.99	218.391	217.47	213.277	198.408	214.42	212.619	271.538	304.945	298.897	306.695	263.994	272.559	274.83	269.59	0	0		0.0636848	0.0636036	-0.0660624	0.050991	0.144715	0.0255428
76.5	3.70742	219.17	227.544	220.733	213.15	218.568	217.893	214.322	198.9	214.937	213.616	271.428	305.501	299.593	306.653	266.924	273.852	274.793	269.77	0	0		0.0625593	0.0630443	-0.0686029	0.0486283	0.144228	0.0247737
76.6	3.71229	222.187	228.471	220.915	213.301	218.737	218.269	215.366	199.438	215.466	214.569	271.337	305.888	300.19	306.611	269.918	275.173	274.755	269.946	0	0		0.0615277	0.0623808	-0.070968	0.0464675	0.143726	0.0241185
76.7	3.7167	224.716	229.273	221.101	213.438	218.895	218.595	216.388	200.014	215.994	215.462	271.261	306.148	300.684	306.569	272.912	276.494	274.718	270.113	0	0		0.0606092	0.0616448	-0.0731152	0.0445415	0.143229	0.0235859
76.8	3.72065	226.763	229.945	221.286	213.561	219.04	218.868	217.367	200.615	216.512	216.277	271.197	306.33	301.075	306.527	275.84	277.785	274.68	270.267	0	0		0.0598178	0.0608709	-0.0750114	0.0428732	0.142758	0.023179
76.9	3.72413	228.356	230.489	221.468	213.666	219.169	219.088	218.282	201.23	217.007	217.002	271.14	306.485	301.371	306.485	278.64	279.019	274.643	270.404	0	0		0.0591621	0.0600957	-0.0766347	0.0414737	0.14233	0.0228953
77	3.72714	229.545	230.913	221.641	213.755	219.28	219.26	219.118	201.844	217.47	217.629	271.085	306.444	301.582	306.444	281.257	280.171	274.606	270.523	0	0		0.0585683	0.059279	-0.0780743	0.0402646	0.141901	0.022678
77.1	3.72967	230.398	231.229	221.804	213.827	219.373	219.389	219.862	202.445	217.893	218.155	271.048	306.403	301.721	306.403	283.643	281.22	274.569	270.62	0	0		0.0580892	0.0585122	-0.0792588	0.0392913	0.14153	0.0225503
77.2	3.73171	231	231.456	221.953	213.883	219.449	219.481	220.506	203.021	218.269	218.581	271.012	306.361	301.808	306.361	285.761	282.149	274.531	270.696	0	0		0.0576944	0.0578059	-0.08023	0.0385089	0.14121	0.0224814
77.3	3.73327	231.446	231.615	222.085	213.924	219.508	219.546	221.045	203.559	218.595	218.912	270.975	306.32	301.861	306.32	287.588	282.947	274.495	270.75	0	0		0.0573557	0.0571739	-0.0810308	0.0378704	0.140939	0.0224419
77.4	3.73433	231.838	231.734	222.199	213.954	219.552	219.594	221.482	204.051	218.868	219.159	270.939	306.279	301.903	306.279	289.113	283.61	274.458	270.784	0	0		0.0570428	0.0566267	-0.0817116	0.0373224	0.140709	0.0224012
77.5	3.73489	231.838	231.838	222.295	213.975	219.583	219.636	221.822	204.489	219.088	219.337	270.903	305.93	301.863	306.238	290.34	284.14	274.421	270.801	0	0		0.0567574	0.0560332	-0.0822966	0.0368678	0.1404	0.0223429
77.6	3.73495	231.838	231.838	222.372	213.991	219.605	219.636	222.076	204.867	219.26	219.462	270.867	305.54	301.823	306.197	291.286	284.543	274.384	270.803	0	0		0.0564691	0.0555079	-0.0827906	0.0364944	0.140138	0.0222811
77.7	3.7345	231.838	231.838	222.433	214.005	219.622	219.636	222.258	205.185	219.389	219.555	270.83	305.029	301.783	306.156	291.982	284.835	274.348	270.793	0	0		0.0561509	0.0550143	-0.0832807	0.036112	0.139857	0.0221651
77.8	3.73355	231.838	231.838	222.478	214.005	219.636	219.636	222.386	205.442	219.481	219.636	270.794	304.32	301.742	306.115	292.471	285.033	274.311	270.777	0	0		0.055783	0.0545204	-0.083809	0.0356859	0.139528	0.0219835
77.9	3.73208	231.838	231.838	222.51	214.005	219.636	219.636	222.481	205.641	219.546	219.636	270.575	303.349	301.6	306.075	292.804	285.162	274.275	270.759	0	0		0.0552473	0.0538927	-0.0844719	0.0351602	0.139081	0.0216851
78	3.73009	231.838	231.838	222.533	214.005	219.636	219.636	222.565	205.791	219.594	219.636	270.331	302.061	301.444	306.034	293.04	285.248	274.239	270.723	0	0		0.0546053	0.0531708	-0.085271	0.0345276	0.13854	0.0212957
78.1	3.72759	231.822	231.838	222.55	214.005	219.636	219.636	222.565	205.898	219.636	219.636	270.015	300.419	301.248	305.994	293.244	285.319	274.202	270.687	0	0		0.053825	0.0523397	-0.0862079	0.0337662	0.137908	0.0208292
78.2	3.72456	231.804	230.842	222.565	214.005	219.636	219.636	222.565	205.973	219.636	219.636	269.581	298.4	300.986	305.954	293.206	285.281	273.825	270.651	0	0		0.0528451	0.0513435	-0.0871331	0.0330971	0.137352	0.0203334
78.3	3.72102	231.779	229.712	222.565	214.005	219.636	219.636	222.565	206.029	219.636	219.636	268.99	296	300.637	305.914	293.167	285.244	273.401	270.616	0	0		0.0516651	0.0501426	-0.0882621	0.0322805	0.136668	0.0197303
78.4	3.71696	231.744	228.186	222.565	214.005	219.636	219.233	222.565	206.078	219.636	219.636	268.211	293.233	300.184	305.873	293.129	285.206	272.843	270.58	0	0		0.0502618	0.0487121	-0.0895509	0.0315241	0.135907	0.0191372
78.5	3.71237	231.695	226.022	222.565	214.005	219.636	218.775	222.565	206.078	219.636	219.636	267.22	290.129	299.612	305.833	293.09	285.169	272.065	270.545	0	0		0.0486491	0.0470646	-0.0909276	0.0307775	0.135147	0.0185205
78.6	3.70727	231.63	223.005	222.565	214.005	219.291	218.158	222.565	206.078	219.636	219.636	266.005	286.735	298.915	305.794	293.052	285.132	270.996	270.51	0	0		0.0469469	0.0453199	-0.0923508	0.0302597	0.134436	0.0180096
78.7	3.70165	231.546	218.964	222.565	213.829	218.9	217.281	222.565	206.078	219.636	219.58	264.563	283.111	298.092	305.754	293.014	285.095	269.576	270.474	0	0		0.0451263	0.043448	-0.0936713	0.0299829	0.133859	0.017651
78.8	3.69551	231.442	213.772	222.565	213.63	218.371	216.06	222.565	206.078	219.636	219.517	262.901	279.327	297.147	305.714	292.861	285.058	267.763	270.439	0	0		0.043191	0.0414522	-0.0949024	0.0300604	0.133422	0.0174526
78.9	3.68887	231.318	207.357	222.565	213.361	217.622	214.424	222.096	206.078	219.636	219.432	261.039	275.462	296.09	305.674	292.694	284.603	265.531	270.459	0	0		0.0410792	0.0396171	-0.095758	0.0306372	0.133391	0.0175493
79	3.68171	231.174	199.705	222.565	212.98	216.577	212.321	221.565	206.078	219.58	219.31	259.003	271.599	294.936	305.635	292.48	284.092	262.876	270.487	0	0		0.039024	0.0378799	-0.0963353	0.0318044	0.133674	0.0179996
79.1	3.67405	231.013	190.86	221.62	212.449	215.177	209.724	220.848	206.078	219.517	219.141	256.831	267.818	293.706	305.596	292.194	283.416	259.814	270.536	0	0		0.0374134	0.036725	-0.0965111	0.033655	0.134696	0.0190756
79.2	3.6659	230.837	180.92	220.549	211.738	213.379	206.626	219.83	206.078	219.432	218.915	254.563	264.199	292.424	305.556	291.81	282.472	256.377	270.621	0	0		0.0359841	0.0359759	-0.0961756	0.0362569	0.136217	0.0206421
79.3	3.65725	230.648	170.036	219.103	210.823	211.158	203.045	218.412	206.078	219.31	218.624	252.247	260.812	291.114	305.517	291.308	281.171	252.619	270.752	0	0		0.0348739	0.0358522	-0.0952368	0.0396498	0.138392	0.0227931
79.4	3.64813	230.452	158.403	217.051	209.694	208.507	199.02	216.512	206.078	219.141	218.265	249.932	257.717	289.805	305.478	290.674	279.441	248.604	270.94	0	0		0.0342081	0.0365495	-0.0936248	0.0438419	0.141351	0.0256021
79.5	3.63853	230.25	146.249	214.192	208.346	205.444	194.614	214.071	206.078	218.915	217.836	247.667	254.959	288.523	305.162	289.9	277.229	244.413	271.192	0	0		0.0339936	0.0381301	-0.0912961	0.0487034	0.145115	0.0290549
79.6	3.62847	230.049	133.829	210.362	206.789	202.002	189.904	211.055	205.217	218.624	217.34	245.497	252.57	287.296	304.808	288.984	274.506	240.132	271.511	0	0		0.03474	0.0411488	-0.0878818	0.0546271	0.150178	0.033441
79.7	3.61796	229.852	121.41	205.44	205.038	198.232	184.983	207.458	204.24	218.265	216.784	243.466	250.563	286.145	304.345	287.932	271.265	235.852	271.898	0	0		0.0361946	0.0453719	-0.083694	0.061189	0.156263	0.038561
79.8	3.60701	229.664	109.256	199.36	203.122	194.203	179.954	203.299	202.921	217.836	216.174	241.609	248.932	285.091	303.705	286.754	267.524	231.664	272.352	0	0		0.0384569	0.0509043	-0.078684	0.0683377	0.163442	0.0444232
79.9	3.59564	229.487	97.6224	192.107	201.073	189.994	174.925	198.626	201.05	217.34	215.522	239.954	247.656	284.15	302.827	285.468	263.327	227.656	272.865	0	0		0.0415974	0.0578031	-0.0728358	0.0759961	0.171752	0.0510076
80	3.58385	229.326	86.7386	183.723	198.933	185.692	170.005	193.509	198.442	216.784	214.841	238.518	246.697	283.331	301.665	284.097	258.735	223.904	273.43	0	0		0.0456539	0.0660753	-0.0661685	0.084064	0.181186	0.0582651
80.1	3.57165	229.183	76.7989	174.302	196.746	181.391	165.294	188.04	194.948	216.174	214.145	237.31	245.999	282.639	300.184	282.666	253.83	220.477	274.037	0	0		0.0506302	0.0756765	-0.0587374	0.0924221	0.191697	0.0661182
80.2	3.55907	229.059	67.9537	163.985	194.559	177.182	160.888	182.326	190.458	215.522	213.45	236.327	245.499	282.072	298.363	281.205	248.709	217.425	274.672	0	0		0.0564942	0.0865106	-0.0506322	0.100938	0.203191	0.0744624
80.3	3.5461	228.955	60.302	152.958	192.419	173.153	156.863	176.487	184.912	214.841	212.769	235.555	245.12	281.623	296.198	279.745	243.478	214.782	275.321	0	0		0.0631779	0.0984308	-0.041974	0.10947	0.215535	0.0831694
80.4	3.53278	228.871	53.8873	141.438	190.37	169.383	153.282	170.648	178.297	214.145	212.117	234.972	244.783	281.28	293.703	278.315	238.248	212.562	275.971	0	0		0.0705778	0.111243	-0.0329103	0.11788	0.228557	0.0920914
80.5	3.51911	228.806	48.6949	129.666	188.454	165.941	150.184	164.934	170.65	213.45	211.507	234.545	244.753	281.023	290.904	276.946	233.131	210.761	276.606	0	0		0.0786918	0.12484	-0.0234279	0.126172	0.242159	0.101152
80.6	3.5051	228.757	44.6534	117.894	186.704	162.877	147.587	159.465	162.056	212.769	210.95	234.236	244.722	280.832	287.843	275.663	228.233	209.353	277.212	0	0		0.0872678	0.138864	-0.0138199	0.134142	0.256046	0.110132
80.7	3.49077	228.722	41.6371	106.374	185.146	160.227	145.485	154.348	152.646	212.117	210.455	234	244.692	280.682	284.575	274.489	223.65	208.297	277.777	0	0		0.0961449	0.153045	-0.00422574	0.141726	0.269998	0.118887
80.8	3.47613	228.697	39.4727	95.3469	183.799	158.006	143.848	149.675	142.588	211.507	210.026	233.788	244.662	280.545	281.164	273.44	219.463	207.531	278.29	0	0		0.105142	0.167094	0.00521927	0.148886	0.283792	0.127286
80.9	3.4612	228.679	37.947	85.0305	182.669	156.208	142.627	145.516	132.08	210.95	209.667	233.759	244.631	280.511	277.679	272.529	215.735	206.984	278.742	0	0		0.114194	0.180839	0.0144996	0.155695	0.297312	0.135292
81	3.44599	228.662	36.8168	75.6091	181.755	154.808	141.751	141.919	121.342	210.455	209.376	233.73	244.601	280.476	274.196	271.76	212.508	206.573	279.129	0	0		0.123022	0.193922	0.0234418	0.162119	0.310301	0.142771
81.1	3.43051	228.662	35.8205	67.225	181.043	153.763	141.133	138.903	110.604	210.026	209.149	233.701	244.571	280.442	270.787	271.131	209.798	206.207	279.447	0	0		0.131458	0.206119	0.0319813	0.168215	0.32262	0.149681
81.2	3.41478	228.662	35.8205	59.9723	180.512	153.014	140.675	136.462	100.097	209.667	208.98	233.673	244.541	280.407	267.524	270.635	207.601	206.182	279.699	0	0		0.139367	0.217248	0.0396634	0.173603	0.333619	0.155744
81.3	3.39881	228.662	35.8205	53.8921	180.131	152.485	140.272	134.562	90.0386	209.376	208.859	233.644	244.511	280.373	264.469	270.256	205.886	206.157	279.887	0	0		0.146631	0.227186	0.0467498	0.178688	0.343583	0.16117
81.4	3.38262	228.662	35.8205	48.9705	179.862	152.094	140.272	133.144	80.6287	209.149	208.774	233.616	244.481	280.339	261.678	269.975	204.599	206.131	280.019	0	0		0.15317	0.235879	0.053167	0.183225	0.352389	0.165811
81.5	3.36622	228.662	35.8205	45.1396	179.663	151.749	140.272	132.126	72.035	208.98	208.71	233.587	244.452	280.305	259.191	269.767	203.67	206.106	280.104	0	0		0.158949	0.243347	0.0588773	0.187409	0.35998	0.169812
81.6	3.34962	228.662	35.8205	42.2806	179.488	151.749	140.272	131.409	64.3876	208.859	208.654	233.559	244.422	280.271	257.036	269.605	203.007	206.081	280.154	0	0		0.16376	0.249453	0.0638815	0.191002	0.366371	0.173084
81.7	3.33284	227.721	35.8205	40.2291	179.488	151.749	140.272	130.877	57.7722	208.774	208.654	233.53	244.392	279.086	255.225	269.458	202.51	206.056	280.182	0	0		0.167756	0.253978	0.068622	0.194671	0.371275	0.175752
81.8	3.3159	226.652	35.8205	38.7829	179.488	151.749	140.272	130.409	52.2261	208.71	208.654	233.502	243.381	277.747	253.753	269.426	202.069	206.031	280.203	0	0		0.170617	0.257188	0.0722945	0.197563	0.374917	0.177709
81.9	3.2988	225.21	35.8205	37.7116	179.488	151.749	140.272	130.409	47.737	208.654	208.654	233.474	242.239	275.953	252.601	269.393	202.045	206.007	280.169	0	0		0.172964	0.259137	0.0752119	0.200129	0.377296	0.179161
82	3.28156	223.164	35.8205	36.7673	179.488	151.749	140.272	130.409	44.2427	208.654	208.654	233.446	240.707	273.421	251.734	269.361	202.021	205.982	280.135	0	0		0.174668	0.260068	0.0777148	0.202441	0.378694	0.180211
82.1	3.2642	220.312	35.8205	36.7673	179.488	151.749	140.272	130.409	41.635	208.654	208.654	233.418	238.546	269.907	251.104	269.328	201.996	205.957	280.102	0	0		0.175241	0.259363	0.0798628	0.204568	0.378518	0.180562
82.2	3.24673	216.492	35.8205	36.7673	179.488	151.749	140.272	130.409	39.7637	208.654	208.654	233.39	235.548	265.211	250.65	269.296	201.972	205.932	280.068	0	0		0.175204	0.257512	0.0817365	0.20659	0.377321	0.180539
82.3	3.22917	211.583	35.8205	36.7673	179.488	151.749	140.272	130.409	38.4446	208.654	208.654	233.362	231.541	259.188	250.307	269.264	201.948	205.908	280.035	0	0		0.174565	0.254467	0.0834332	0.2086	0.375094	0.180152
82.4	3.21152	205.519	35.8205	36.7673	179.488	151.749	140.272	130.409	37.4674	208.654	208.654	232.455	226.401	251.756	250.001	269.232	201.924	205.883	280.001	0	0		0.172988	0.249895	0.0846007	0.210341	0.371605	0.179204
82.5	3.19379	198.285	35.8205	36.7673	179.488	151.749	140.272	130.409	36.606	208.654	208.654	231.43	220.06	242.899	249.971	269.2	201.9	205.859	279.968	0	0		0.170962	0.244235	0.0857498	0.212338	0.367238	0.178
82.6	3.17601	189.923	35.8205	36.7673	179.488	151.749	140.272	130.409	36.606	208.654	208.654	230.056	212.503	232.667	249.942	269.168	201.876	205.834	278.785	0	0		0.167781	0.236329	0.0856387	0.213435	0.361317	0.175823
82.7	3.15817	180.527	35.8205	36.7673	179.488	151.749	140.272	130.409	36.606	208.654	207.808	228.12	203.774	221.176	249.912	268.038	201.852	205.81	277.447	0	0		0.163825	0.226992	0.0857114	0.214971	0.354551	0.173195
82.8	3.14029	170.238	35.8205	36.7673	179.488	151.749	140.272	130.409	36.606	208.654	206.847	225.432	193.969	208.599	249.883	266.76	201.828	205.786	275.654	0	0		0.158977	0.216035	0.0851879	0.216245	0.346703	0.169952
82.9	3.12237	159.24	35.8205	36.7673	179.488	151.749	140.272	130.409	36.606	208.654	205.55	221.841	183.238	195.16	249.853	265.047	201.804	205.761	273.124	0	0		0.153142	0.203303	0.0839025	0.21716	0.337819	0.165977
83	3.10442	147.751	35.8205	36.7673	179.488	151.749	140.272	130.409	36.606	207.813	203.711	217.236	171.773	181.125	249.824	262.63	201.781	205.737	269.613	0	0		0.146788	0.189226	0.0817035	0.217625	0.328545	0.16149
83.1	3.08645	136.01	35.8205	36.7673	179.488	151.749	140.272	130.409	36.606	206.859	201.147	211.554	159.798	166.786	249.794	259.275	201.757	205.713	264.919	0	0		0.139429	0.173271	0.0784549	0.217564	0.318497	0.156139
83.2	3.06847	124.268	35.8205	36.7673	179.488	151.749	140.272	130.409	36.606	205.57	197.712	204.783	147.564	152.45	249.765	254.791	201.733	205.689	258.9	0	0		0.131213	0.155567	0.0740398	0.216912	0.307955	0.149953
83.3	3.05047	112.779	35.8205	36.7673	179.488	151.749	140.272	130.409	36.606	203.743	193.298	196.961	135.333	138.425	249.736	249.041	201.71	204.906	251.472	0	0		0.122336	0.136299	0.067885	0.215271	0.296932	0.142759
83.4	3.03247	101.781	35.8205	36.7673	178.807	151.749	140.272	130.409	36.606	201.196	187.846	188.177	123.367	125.003	249.707	241.945	201.686	204.02	242.619	0	0		0.113512	0.116161	0.0608022	0.21289	0.285981	0.135098
83.5	3.01446	91.4923	35.8205	36.7673	178.034	151.749	140.272	130.409	36.606	197.783	181.342	178.562	111.915	112.447	249.678	233.488	201.663	202.834	232.393	0	0		0.104632	0.0950588	0.0521961	0.209653	0.275346	0.126775
83.6	2.99645	82.0958	35.8205	36.7673	176.991	151.749	140.272	130.409	36.606	193.399	173.824	168.289	101.203	100.983	249.649	223.719	201.64	201.161	220.907	0	0		0.0961444	0.0734615	0.0420503	0.20546	0.265268	0.117928
83.7	2.97844	73.7339	35.8205	36.7673	175.511	151.749	140.272	130.409	36.606	187.982	165.376	157.56	91.421	90.7814	248.64	212.746	201.616	198.839	208.336	0	0		0.0879049	0.0512712	0.0303862	0.199715	0.255519	0.108371
83.8	2.96042	66.5004	35.8205	36.7673	173.449	151.749	140.272	130.409	36.606	181.521	156.125	146.599	82.7171	81.9573	247.5	200.737	201.593	195.737	194.904	0	0		0.0808657	0.0294888	0.017268	0.192767	0.246656	0.0985495
83.9	2.94241	60.4362	35.8205	36.7673	170.686	151.749	140.272	130.409	36.606	174.051	146.237	135.641	75.1882	74.5599	245.971	187.905	201.57	191.76	180.875	0	0		0.0752878	0.0084721	0.00280916	0.184438	0.238718	0.0885485
84	2.92439	55.5276	35.8205	36.7673	167.137	151.749	140.272	130.409	36.606	165.658	135.907	124.919	68.8764	68.5719	243.815	174.503	201.547	186.852	166.543	0	0		0.0713648	-0.0114614	-0.0128233	0.174569	0.231681	0.0784538
84.1	2.90637	51.7069	35.8205	36.7673	162.751	151.209	140.272	130.409	36.606	156.468	125.35	114.659	63.7672	63.9104	240.822	160.812	200.801	181.003	152.215	0	0		0.0691311	-0.0296566	-0.0294047	0.163519	0.225456	0.0683014
84.2	2.88834	48.8555	35.8205	36.7673	157.52	150.597	140.272	130.409	36.606	146.644	114.794	105.061	59.7896	60.4304	236.822	147.123	199.959	174.246	138.196	0	0		0.0686577	-0.0462696	-0.0466525	0.150814	0.219874	0.058182
84.3	2.87032	46.8094	35.8205	36.7673	151.473	149.771	140.272	130.409	36.606	136.381	104.464	96.296	56.82	57.9319	231.691	133.731	198.83	166.658	124.78	0	0		0.0698365	-0.06112	-0.0642313	0.136558	0.214683	0.0481275
84.4	2.85228	45.3671	35.8205	36.7673	144.678	148.599	139.775	130.409	36.606	125.894	94.5757	88.4971	54.6878	56.169	225.361	120.915	197.238	158.353	112.23	0	0		0.0724578	-0.0741524	-0.0817655	0.121403	0.209535	0.0384017
84.5	2.83425	44.2986	35.8205	36.7673	137.238	146.966	139.212	130.409	36.606	115.406	85.3248	81.7508	53.1833	54.8619	217.816	108.926	195.029	149.479	100.77	0	0		0.0762193	-0.085458	-0.0988602	0.105176	0.203989	0.028755
84.6	2.81621	43.3568	35.8205	36.7673	129.285	144.777	138.452	130.409	36.606	105.143	76.8764	76.0949	52.0675	53.7091	209.1	97.978	192.078	140.211	90.5733	0	0		0.0807374	-0.095293	-0.115132	0.0882798	0.197508	0.0191803
84.7	2.79816	43.3568	35.8205	36.7673	120.976	141.966	137.373	130.409	36.606	95.3196	69.3583	71.5162	51.0834	53.7031	199.312	88.2369	188.294	130.743	81.7531	0	0		0.0855868	-0.102683	-0.131452	0.0700047	0.190528	0.00974444
84.8	2.78011	43.3568	35.8205	36.7673	112.485	138.492	135.87	130.409	36.606	86.1291	62.8546	67.9513	51.0777	53.697	188.598	79.8109	183.624	121.277	74.359	0	0		0.0912216	-0.107731	-0.145162	0.0525612	0.182781	0.000978137
84.9	2.76205	43.3568	35.8205	36.7673	103.995	134.349	133.856	130.409	36.606	77.7358	57.4023	65.2894	51.0719	53.691	177.15	72.7471	178.06	112.015	68.3737	0	0		0.096498	-0.111484	-0.157366	0.0355187	0.173401	-0.00758555
85	2.74399	43.3568	35.8205	36.7673	95.6862	129.559	131.268	130.409	36.606	70.2666	52.989	63.3777	51.0662	53.685	165.194	67.0291	171.632	103.152	63.7142	0	0		0.101082	-0.114085	-0.16794	0.0192946	0.16234	-0.0159029
85.1	2.72591	43.3568	35.8205	36.7673	87.7332	124.177	128.071	130.409	36.606	63.8054	49.5539	62.0283	51.0605	53.679	152.979	62.5778	164.412	94.8607	60.2358	0	0		0.104623	-0.115786	-0.176922	0.00426679	0.14964	-0.0239665
85.2	2.70783	43.3568	35.8205	36.7673	80.2926	118.284	124.258	130.409	36.606	58.3887	46.9902	61.0272	51.0548	53.673	140.767	59.2547	156.511	87.2895	57.7385	0	0		0.10677	-0.116953	-0.184535	-0.00926075	0.135436	-0.0318155
85.3	2.68973	43.3568	35.8205	36.7673	73.4975	111.984	119.85	129.989	36.606	54.0042	45.1505	60.1441	51.0491	53.667	128.819	56.8688	148.068	80.5524	55.9765	0	0		0.107187	-0.117592	-0.190638	-0.0210925	0.12056	-0.0392386
85.4	2.67162	43.3568	35.8205	36.7673	67.4506	105.403	114.896	129.512	36.606	50.5914	43.8537	60.1374	51.0435	53.6611	117.384	55.1854	139.251	74.7245	54.67	0	0		0.106744	-0.117179	-0.194288	-0.0297826	0.10598	-0.0458153
85.5	2.6535	43.3568	35.8205	36.7673	62.2196	98.6781	109.472	128.868	36.606	48.0444	42.893	60.1308	51.0378	53.6551	106.688	53.9371	130.243	69.8385	53.5179	0	0		0.104591	-0.117023	-0.197229	-0.0361746	0.0915223	-0.0521185
85.6	2.63537	43.3568	35.8205	36.7673	57.8343	91.9529	103.674	127.955	36.606	46.2167	42.0462	60.1241	51.0322	53.6492	96.921	52.8364	121.237	65.883	53.512	0	0		0.100948	-0.115207	-0.196923	-0.0381598	0.0779683	-0.0569332
85.7	2.61721	43.3568	35.8205	36.7673	54.2847	85.3719	97.6169	126.682	36.606	44.9284	42.0462	60.1175	51.0266	53.6433	88.23	52.8305	112.426	62.8032	53.5061	0	0		0.0961787	-0.113022	-0.196632	-0.0382862	0.0662341	-0.0605394
85.8	2.59905	43.3568	35.8205	36.7673	51.5217	79.0725	91.4272	124.976	36.606	43.974	42.0462	60.1109	51.021	53.6374	80.7122	52.8247	103.993	60.5035	53.5002	0	0		0.0907901	-0.11004	-0.195173	-0.0354499	0.0568768	-0.0628621
85.9	2.58086	43.3568	35.8205	36.7673	49.4597	73.179	85.2375	122.785	36.606	43.1327	42.0462	60.1043	51.0154	53.6315	74.4096	52.8189	96.1043	58.8518	53.4944	0	0		0.0854101	-0.10583	-0.192594	-0.0299138	0.0504104	-0.0635848
86	2.56266	43.3568	35.8205	36.7673	47.9801	67.7968	79.1805	120.078	36.606	43.1327	42.0462	60.0977	51.0098	53.6257	69.3077	52.8132	88.9008	57.6858	53.4885	0	0		0.0790235	-0.101317	-0.189004	-0.0221621	0.0456589	-0.0633225
86.1	2.54443	43.3568	35.8205	36.7673	46.937	63.0072	73.3828	116.849	36.606	43.1327	42.0462	60.0912	51.0042	53.6198	65.3357	52.8074	82.4909	56.8207	53.4827	0	0		0.0733833	-0.095346	-0.184557	-0.0128842	0.0437191	-0.0614206
86.2	2.5262	43.3568	35.8205	36.7673	46.1644	58.8639	67.9586	113.117	36.606	43.1327	42.0462	60.0846	50.9987	53.614	62.3702	52.8016	76.9459	56.0575	53.4769	0	0.0987679		0.0687677	-0.0879506	-0.179229	-0.00275744	0.0441969	-0.0579483
86.3	2.50794	43.3568	35.8205	36.7673	45.4833	55.3904	63.0049	108.922	36.606	43.1327	42.0462	60.0781	50.9931	53.6082	60.2408	52.7959	72.297	56.0514	53.471	0	0.21079		0.0653829	-0.0792318	-0.171527	0.00864986	0.0478325	-0.05234
86.4	2.48967	43.3568	35.8205	36.7673	45.4833	52.5789	58.5967	104.33	36.606	43.1327	42.0462	60.0716	50.9876	53.6023	58.7381	52.7902	68.5333	56.0453	53.4653	0	0.361992		0.0618488	-0.070553	-0.164046	0.0194372	0.0531476	-0.046283
86.5	2.47139	43.3568	35.8205	36.7673	45.4833	50.3904	54.7834	99.4204	36.606	43.1327	42.0462	60.0651	50.9821	53.5966	57.6236	52.7845	65.6028	56.0393	53.4595	0	0.576453		0.059112	-0.0613986	-0.155789	0.0290589	0.0596877	-0.0395053
86.6	2.45309	43.3568	35.8205	36.7673	45.4833	48.7572	51.5865	94.2918	36.606	43.1327	42.0462	60.0586	50.9766	53.5908	56.6407	52.7788	63.4144	56.0332	53.4537	0	0.875284		0.0567534	-0.052294	-0.146834	0.0370468	0.0669326	-0.0324372
86.7	2.43479	43.3568	35.8205	36.7673	45.4833	47.5852	48.9988	89.0507	36.606	43.1327	42.0462	60.0522	50.9711	53.585	56.6346	52.7731	61.8425	56.0272	53.448	0	1.27564		0.0562559	-0.0417474	-0.137297	0.0450341	0.0759937	-0.0242919
86.8	2.41648	43.3568	35.8205	36.7673	45.4833	46.759	46.9846	83.8097	36.606	43.1327	42.0462	60.0457	50.9656	53.5793	56.6285	52.7675	60.7327	56.0212	53.4422	0	1.78992		0.0558868	-0.0315517	-0.127325	0.0515019	0.0852122	-0.0163151
86.9	2.39818	43.3568	35.8205	36.7673	45.4833	46.147	45.4814	78.6811	36.606	43.1327	42.0462	60.0393	50.9602	53.5735	56.6224	52.7618	59.9091	56.0152	53.4365	0	2.42518		0.0555982	-0.0217036	-0.117095	0.0567926	0.0943881	-0.00865045
87	2.37988	43.3568	35.8205	36.7673	45.4833	45.6075	44.4027	73.7719	36.606	43.1327	42.0462	60.0329	50.9547	53.5678	56.6164	52.7562	59.1826	56.0092	53.4308	0	3.18283		0.0553365	-0.0121701	-0.1068	0.0613314	0.103318	-0.00141325
87.1	2.3616	43.3568	35.8205	36.7673	45.4833	45.6075	43.6423	69.1791	36.606	43.1327	42.0462	60.0265	50.9493	53.5621	56.6103	52.7505	59.1762	56.0033	53.4251	0	4.05854		0.0552834	-0.00399502	-0.0966472	0.0643633	0.111803	0.00553938
87.2	2.34334	43.3568	35.8205	36.7673	45.4833	45.6075	43.0791	64.9847	36.606	43.1327	42.0462	60.0201	50.9439	53.5564	56.6043	52.7449	59.17	55.9973	53.4194	0	5.04244		0.0552304	0.00358705	-0.0868394	0.0671871	0.119665	0.0120023
87.3	2.32512	43.3568	35.8205	36.7673	45.4833	45.6075	42.5825	61.2522	36.606	43.1327	42.0462	60.0137	50.9385	53.5507	56.5983	52.7393	59.1637	55.9914	53.4138	0	6.11962		0.0551775	0.0104277	-0.0775657	0.0700359	0.126751	0.0180144
87.4	2.30693	43.3568	35.8205	36.7673	45.4833	45.6075	42.5825	58.0233	36.606	43.1327	42.0462	60.0074	50.9331	53.5451	56.5923	52.7338	59.1574	55.9854	53.4081	0	7.27079		0.0551248	0.0164151	-0.0689884	0.0720036	0.132947	0.0229873
87.5	2.28879	43.3568	35.8205	36.7673	45.4833	45.6075	42.5825	55.3163	36.606	43.1327	42.0462	60.0011	50.9277	53.5394	56.5864	52.7282	59.1512	55.9795	53.4025	0	8.47322		0.0550722	0.0214821	-0.0612317	0.0740525	0.138188	0.0274298
87.6	2.27072	43.3568	35.8205	36.7673	45.4833	45.6075	42.5825	53.1253	36.606	43.1327	42.0462	59.9947	50.9224	53.5338	56.5804	52.7227	59.145	55.9736	53.3969	0	9.70175		0.0550197	0.0256115	-0.0543734	0.0761377	0.142456	0.0313097
87.7	2.25271	43.3568	35.8205	36.7673	45.4833	45.6075	42.5825	51.4198	36.606	43.1327	42.0462	59.9884	50.917	53.5281	56.5745	52.7171	59.1387	55.9678	53.3912	0	10.93		0.0549674	0.028838	-0.0484396	0.0782132	0.145791	0.0346246
87.8	2.23479	43.3568	35.8205	36.7673	45.4833	45.6075	42.5825	50.147	36.606	43.1327	42.0462	59.9822	50.9117	53.5225	56.5685	52.7116	59.1326	55.9619	53.3857	0	12.1317		0.0549151	0.0312466	-0.0434032	0.0802338	0.148279	0.0374015
87.9	2.21696	43.3568	35.8205	36.7673	45.4833	45.6075	42.5825	49.2336	36.606	43.1327	42.0462	59.9759	50.9064	53.5169	56.5626	52.7061	59.1264	55.9561	53.3801	0	13.2817		0.054863	0.0329675	-0.0391865	0.0821572	0.150057	0.0396958
88	2.19924	43.3568	35.8205	36.7673	45.4833	45.6075	42.5825	48.5898	36.606	43.1327	42.0462	59.9696	50.9011	53.5114	56.5567	52.7006	59.1202	55.9502	53.3745	0	14.3572		0.054811	0.034169	-0.0356662	0.0839457	0.1513	0.0415876
88.1	2.18162	43.3568	35.8205	36.7673	45.4833	45.6075	42.5825	48.1129	36.606	43.1327	42.0462	59.9634	50.8958	53.5058	56.5508	52.6951	59.1141	55.9444	53.369	0	15.3391		0.0547592	0.0350476	-0.032682	0.0855684	0.152209	0.043177
88.2	2.16413	43.3568	35.8205	36.7673	45.4833	45.6075	42.5825	47.6924	36.606	43.1327	42.0462	59.9572	50.8905	53.5002	56.545	52.6896	59.1079	55.9386	53.3634	0	16.2125		0.0547075	0.0358175	-0.0300453	0.0870017	0.153005	0.0445795
88.3	2.14676	43.3568	35.8205	36.7673	45.4833	45.6075	42.5825	47.6924	36.606	43.1327	42.0462	59.951	50.8852	53.4947	56.5391	52.6842	59.1018	55.9328	53.3579	0	16.9677		0.0546558	0.0357658	-0.0284997	0.0882309	0.152955	0.0453515
88.4	2.12953	43.3568	35.8205	36.7673	45.4833	45.6075	42.5825	47.6924	36.606	43.1327	42.0462	59.9448	50.88	53.4892	56.5333	52.6787	59.0957	55.927	53.3524	0	17.6004		0.0546044	0.0357142	-0.027216	0.0892504	0.152904	0.0459894
88.5	2.11245	43.3568	35.8205	36.7673	45.4833	45.6075	42.5825	47.6924	36.606	43.1327	42.0462	59.9386	50.8747	53.4837	56.5275	52.6733	59.0896	55.9213	53.3469	0	18.1121		0.054553	0.0356627	-0.0261891	0.0900642	0.152854	0.0464953
88.6	2.09552	43.3568	35.8205	36.7673	45.4833	45.6075	42.5825	47.6924	36.606	43.1327	42.0462	59.9324	50.8695	53.4782	56.5216	52.6679	59.0835	55.9155	53.3414	0	18.5099		0.0545018	0.0356114	-0.0254028	0.0906853	0.152804	0.0468773
88.7	2.07874	43.3568	35.8205	36.7673	45.4833	45.6075	42.5825	47.6924	36.606	43.1327	42.0462	59.9263	50.8643	53.4727	56.5159	52.6625	59.0775	55.9098	53.3359	0	18.8062		0.0544506	0.0355602	-0.0248297	0.0911354	0.152754	0.0471493
88.8	2.06213	43.3568	35.8205	36.7673	45.4833	45.6075	42.5825	47.6924	36.606	43.1327	42.0462	59.9202	50.8591	53.4672	56.5101	52.6571	59.0714	55.9041	53.3305	0	19.0183		0.0543996	0.0355091	-0.0244333	0.0914439	0.152704	0.04733
88.9	2.04569	43.3568	35.8205	36.7673	45.4833	45.6075	42.5825	47.6924	36.606	43.1327	42.0462	59.914	50.8539	53.4618	56.5043	52.6517	59.0654	55.8984	53.325	0	19.1672		0.0543488	0.0354582	-0.024169	0.0916463	0.152654	0.0474424
89	2.02944	43.3568	35.8205	36.7673	45.4833	45.6075	42.5825	47.6924	36.606	43.1327	42.0462	59.9079	50.8487	53.4563	56.4986	52.6464	59.0594	55.8927	53.3196	0	19.277		0.054298	0.0354073	-0.0239865	0.0917831	0.152604	0.0475126
89.1	2.01336	43.3568	35.8205	36.7673	45.4833	45.6075	42.5825	47.6924	36.606	43.1327	42.0462	59.9019	50.8435	53.4509	56.4928	52.641	59.0534	55.887	53.3142	0	19.3735		0.0542474	0.0353566	-0.0238316	0.0918978	0.152555	0.0475685
89.2	1.99749	43.3568	35.8205	36.7673	45.4833	45.6075	42.5825	47.6924	36.606	43.1327	42.0462	59.8958	50.8384	53.4455	56.4871	52.6357	59.0474	55.8813	53.3088	0	19.3715		0.0541969	0.035306	-0.0238822	0.0918476	0.152505	0.0475179
89.3	1.98181	43.3568	35.8205	36.7673	45.4833	45.6075	42.5825	47.6924	36.606	43.1327	42.0462	59.8897	50.8332	53.4401	56.4814	52.6304	59.0414	55.8757	53.3034	0	19.3695		0.0541465	0.0352555	-0.0239327	0.0917975	0.152456	0.0474675
89.4	1.96635	43.3568	35.8205	36.7673	45.4833	45.6075	42.5825	47.6924	36.606	43.1327	42.0462	59.8837	50.8281	53.4347	56.4757	52.6251	59.0355	55.87	53.298	0	19.3676		0.0540962	0.0352052	-0.0239831	0.0917475	0.152407	0.0474172
89.5	1.9511	43.3568	35.8205	36.7673	45.4833	45.6075	42.5825	47.6924	36.606	43.1327	42.0462	59.8777	50.823	53.4293	56.47	52.6198	59.0296	55.8644	53.2927	0	19.3656		0.0540461	0.035155	-0.0240334	0.0916976	0.152358	0.047367
89.6	1.93609	43.3568	35.8205	36.7673	45.4833	45.6075	42.5825	47.6924	36.606	43.1327	42.0462	59.8717	50.8179	53.424	56.4643	52.6145	59.0236	55.8588	53.2873	0	19.3637		0.053996	0.0351048	-0.0240835	0.0916478	0.152309	0.047317
89.7	1.92131	43.3568	35.8205	36.7673	45.4833	45.6075	42.5825	47.6924	36.606	43.1327	42.0462	59.8657	50.8128	53.4186	56.4587	52.6092	59.0177	55.8532	53.282	0	19.3618		0.0539461	0.0350548	-0.0241336	0.0915982	0.15226	0.047267
89.8	1.90678	43.3568	35.8205	36.7673	45.4833	45.6075	42.5825	47.6924	36.606	43.1327	42.0462	59.8597	50.8077	53.4133	56.453	52.604	59.0118	55.8477	53.2767	0	19.3598		0.0538963	0.035005	-0.0241835	0.0915487	0.152211	0.0472172
89.9	1.89252	43.3568	35.8205	36.7673	45.4833	45.6075	42.5825	47.6924	36.606	43.1327	42.0462	59.8537	50.8027	53.4079	56.4474	52.5987	59.0059	55.8421	53.2714	0	19.3579		0.0538467	0.0349552	-0.0242333	0.0914993	0.152162	0.0471675
90	1.87852	43.3568	35.8205	36.7673	45.4833	45.6075	42.5825	47.6924	36.606	43.1327	42.0462	59.8478	50.7976	53.4026	56.4418	52.5935	59.0001	55.8365	53.2661	0	19.356		0.0537971	0.0349056	-0.0242829	0.09145	0.152114	0.0471179
90.1	1.86481	43.3568	35.8205	36.7673	45.4833	45.6075	42.5825	47.6924	36.606	43.1327	42.0462	59.8419	50.7926	53.3973	56.4362	52.5883	58.9942	55.831	53.2608	0	19.3541		0.0537477	0.0348561	-0.0243325	0.0914008	0.152065	0.0470684
90.2	1.8514	43.3568	35.8205	36.7673	45.4833	45.6075	42.5825	47.6924	36.606	43.1327	42.0462	59.8359	50.7876	53.3921	56.4306	52.5831	58.9884	55.8255	53.2555	0	19.3521		0.0536984	0.0348067	-0.0243819	0.0913518	0.152017	0.0470191
90.3	1.8383	43.3568	35.8205	36.7673	45.4833	45.6075	42.5825	47.6924	36.606	43.1327	42.0462	59.83	50.7826	53.3868	56.4251	52.5779	58.9826	55.82	53.2503	0	19.3502		0.0536492	0.0347574	-0.0244312	0.0913029	0.151969	0.0469699
90.4	1.82551	43.3568	35.8205	36.7673	45.4833	45.6075	42.5825	47.6924	36.606	43.1327	42.0462	59.8241	50.7776	53.3815	56.4195	52.5727	58.9768	55.8145	53.245	0	19.3483		0.0536001	0.0347082	-0.0244804	0.0912541	0.151921	0.0469207
90.5	1.81307	43.3568	35.8205	36.7673	45.4833	45.6075	42.5825	47.6924	36.606	43.1327	42.0462	59.8183	50.7726	53.3763	56.414	52.5676	58.971	55.809	53.2398	0	19.3464		0.0535511	0.0346592	-0.0245295	0.0912054	0.151873	0.0468718
90.6	1.80097	43.3568	35.8205	36.7673	45.4833	45.6075	42.5825	47.6924	36.606	43.1327	42.0462	59.8124	50.7676	53.3711	56.4084	52.5624	58.9652	55.8035	53.2346	0	19.3445		0.0535023	0.0346102	-0.0245784	0.0911568	0.151825	0.0468229
90.7	1.78923	43.3568	35.8205	36.7673	45.4833	45.6075	42.5825	47.6924	36.606	43.1327	42.0462	59.8066	50.7626	53.3659	56.4029	52.5573	58.9594	55.7981	53.2294	0	19.3426		0.0534535	0.0345614	-0.0246273	0.0911083	0.151777	0.0467741
90.8	1.77787	43.3568	35.8205	36.7673	45.4833	45.6075	42.5825	47.6924	36.606	43.1327	42.0462	59.8007	50.7577	53.3606	56.3974	52.5522	58.9537	55.7926	53.2242	0	19.3408		0.0534049	0.0345127	-0.024676	0.09106	0.151729	0.0467255
90.9	1.76691	43.3568	35.8205	36.7673	45.4833	45.6075	42.5825	47.6924	36.606	43.1327	42.0462	59.7949	50.7528	53.3555	56.3919	52.547	58.948	55.7872	53.219	0	19.3389		0.0533564	0.0344642	-0.0247246	0.0910117	0.151682	0.0466769
91	1.75635	43.3568	35.8205	36.7673	45.4833	45.6075	42.5825	47.6924	36.606	43.1327	42.0462	59.7891	50.7478	53.3503	56.3865	52.5419	58.9422	55.7818	53.2138	0	19.337		0.0533081	0.0344157	-0.0247731	0.0909636	0.151635	0.0466285
91.1	1.74622	43.3568	35.8205	36.7673	45.4833	45.6075	42.5825	47.6924	36.606	43.1327	42.0462	59.7833	50.7429	53.3451	56.381	52.5369	58.9365	55.7764	53.2087	0	19.3351		0.0532598	0.0343674	-0.0248214	0.0909156	0.151587	0.0465802
91.2	1.73652	43.3568	35.8205	36.7673	45.4833	45.6075	42.5825	47.6924	36.606	43.1327	42.0462	59.7775	50.738	53.34	56.3756	52.5318	58.9308	55.771	53.2035	0	19.3333		0.0532116	0.0343191	-0.0248697	0.0908677	0.15154	0.0465321
91.3	1.72727	43.3568	35.8205	36.7673	45.4833	45.6075	42.5825	47.6924	36.606	43.1327	42.0462	59.7718	50.7331	53.3348	56.3701	52.5267	58.9252	55.7656	53.1984	0	19.3314		0.0531636	0.034271	-0.0249178	0.09082	0.151493	0.046484
91.4	1.71849	43.3568	35.8205	36.7673	45.4833	45.6075	42.5825	47.6924	36.606	43.1327	42.0462	59.766	50.7283	53.3297	56.3647	52.5217	58.9195	55.7603	53.1933	0	19.3295		0.0531157	0.034223	-0.0249659	0.0907723	0.151446	0.046436
91.5	1.71019	43.3568	35.8205	36.7673	45.4833	45.6075	42.5825	47.6924	36.606	43.1327	42.0462	59.7603	50.7234	53.3246	56.3593	52.5166	58.9139	55.7549	53.1882	0	19.3277		0.0530679	0.0341752	-0.0250138	0.0907248	0.151399	0.0463882
91.6	1.70238	43.3568	35.8205	36.7673	45.4833	45.6075	42.5825	47.6924	36.606	43.1327	42.0462	59.7546	50.7185	53.3195	56.3539	52.5116	58.9082	55.7496	53.1831	0	19.3258		0.0530202	0.0341274	-0.0250616	0.0906773	0.151353	0.0463405
91.7	1.69508	43.3568	35.8205	36.7673	45.4833	45.6075	42.5825	47.6924	36.606	43.1327	42.0462	59.7489	50.7137	53.3144	56.3486	52.5066	58.9026	55.7443	53.178	0	19.324		0.0529726	0.0340797	-0.0251092	0.09063	0.151306	0.0462929
91.8	1.6883	43.3568	35.8205	36.7673	45.4833	45.6075	42.5825	47.6924	36.606	43.1327	42.0462	59.7432	50.7089	53.3093	56.3432	52.5016	58.897	55.739	53.173	0	19.3222		0.0529252	0.0340322	-0.0251568	0.0905828	0.151259	0.0462454
91.9	1.68206	43.3568	35.8205	36.7673	45.4833	45.6075	42.5825	47.6924	36.606	43.1327	42.0462	59.7375	50.7041	53.3043	56.3378	52.4966	58.8914	55.7337	53.1679	0	19.3203		0.0528778	0.0339848	-0.0252043	0.0905357	0.151213	0.046198
92	1.67636	43.3568	35.8205	36.7673	45.4833	45.6075	42.5825	47.6924	36.606	43.1327	42.0462	59.7319	50.6993	53.2992	56.3325	52.4917	58.8858	55.7284	53.1629	0	19.3185		0.0528306	0.0339375	-0.0252516	0.0904888	0.151167	0.0461507
92.1	1.67122	43.3568	35.8205	36.7673	45.4833	45.6075	42.5825	47.6924	36.606	43.1327	42.0462	59.7262	50.6945	53.2942	56.3272	52.4867	58.8803	55.7231	53.1579	0	19.3167		0.0527835	0.0338903	-0.0252988	0.0904419	0.151121	0.0461036
92.2	1.66665	43.3568	35.8205	36.7673	45.4833	45.6075	42.5825	47.6924	36.606	43.1327	42.0462	59.7206	50.6897	53.2892	56.3219	52.4817	58.8747	55.7179	53.1529	0	19.3148		0.0527365	0.0338432	-0.0253459	0.0903951	0.151074	0.0460566
92.3	1.66267	43.3568	35.8205	36.7673	45.4833	45.6075	42.5825	47.6924	36.606	43.1327	42.0462	59.715	50.6849	53.2841	56.3166	52.4768	58.8692	55.7126	53.1479	0	19.313		0.0526896	0.0337962	-0.0253929	0.0903485	0.151029	0.0460096
92.4	1.65928	43.3568	35.8205	36.7673	45.4833	45.6075	42.5825	47.6924	36.606	43.1327	42.0462	59.7094	50.6802	53.2791	56.3113	52.4719	58.8636	55.7074	53.1429	0	19.3112		0.0526428	0.0337494	-0.0254398	0.090302	0.150983	0.0459628
92.5	1.6565	43.3568	35.8205	36.7673	45.4833	45.6075	42.5825	47.6924	36.606	43.1327	42.0462	59.7038	50.6754	53.2742	56.306	52.467	58.8581	55.7022	53.1379	0	19.3094		0.0525961	0.0337026	-0.0254866	0.0902556	0.150937	0.0459161
92.6	1.65433	43.3568	35.8205	36.7673	45.4833	45.6075	42.5825	47.6924	36.606	43.1327	42.0462	59.6982	50.6707	53.2692	56.3008	52.4621	58.8526	55.697	53.1329	0	19.3076		0.0525496	0.033656	-0.0255332	0.0902093	0.150891	0.0458695
92.7	1.65278	43.3568	35.8205	36.7673	45.4833	45.6075	42.5825	47.6924	36.606	43.1327	42.0462	59.6927	50.666	53.2642	56.2955	52.4572	58.8472	55.6918	53.128	0	19.3058		0.0525031	0.0336095	-0.0255798	0.0901631	0.150846	0.0458231
92.8	1.65187	43.3568	35.8205	36.7673	45.4833	45.6075	42.5825	47.6924	36.606	43.1327	42.0462	59.6871	50.6613	53.2593	56.2903	52.4523	58.8417	55.6866	53.1231	0	19.304		0.0524568	0.033563	-0.0256262	0.090117	0.1508	0.0457767
92.9	1.65159	43.3568	35.8205	36.7673	45.4833	45.6075	42.5825	47.6924	36.606	43.1327	42.0462	59.6816	50.6566	53.2543	56.2851	52.4475	58.8362	55.6815	53.1181	0	19.3022		0.0524106	0.0335167	-0.0256725	0.090071	0.150755	0.0457304
93	1.65196	43.3568	35.8205	36.7673	45.4833	45.6075	42.5825	47.6924	36.606	43.1327	42.0462	59.6761	50.6519	53.2494	56.2799	52.4426	58.8308	55.6763	53.1132	0	19.3004		0.0523645	0.0334706	-0.0257187	0.0900251	0.15071	0.0456843
93.1	1.65297	43.3568	35.8205	36.7673	45.4833	45.6075	42.5825	47.6924	36.606	43.1327	42.0462	59.6706	50.6472	53.2445	56.2747	52.4378	58.8254	55.6712	53.1083	0	19.2987		0.0523185	0.0334245	-0.0257648	0.0899794	0.150665	0.0456383
93.2	1.65464	43.3568	35.8205	36.7673	45.4833	45.6075	42.5825	47.6924	36.606	43.1327	42.0462	59.6651	50.6425	53.2396	56.2695	52.4329	58.82	55.6661	53.1034	0	19.2969		0.0522726	0.0333785	-0.0258108	0.0899337	0.15062	0.0455924
93.3	1.65695	43.3568	35.8205	36.7673	45.4833	45.6075	42.5825	47.6924	36.606	43.1327	42.0462	59.6596	50.6379	53.2347	56.2643	52.4281	58.8146	55.661	53.0986	0	19.2951		0.0522268	0.0333327	-0.0258567	0.0898882	0.150575	0.0455465
93.4	1.65991	43.3568	35.8205	36.7673	45.4833	45.6075	42.5825	47.6924	36.606	43.1327	42.0462	59.6541	50.6333	53.2298	56.2592	52.4233	58.8092	55.6559	53.0937	0	19.2933		0.0521811	0.0332869	-0.0259024	0.0898428	0.15053	0.0455008
93.5	1.66352	43.3568	35.8205	36.7673	45.4833	45.6075	42.5825	47.6924	36.606	43.1327	42.0462	59.6487	50.6286	53.225	56.254	52.4185	58.8038	55.6508	53.0888	0	19.2916		0.0521356	0.0332413	-0.0259481	0.0897975	0.150486	0.0454553
93.6	1.66777	43.3568	35.8205	36.7673	45.4833	45.6075	42.5825	47.6924	36.606	43.1327	42.0462	59.6432	50.624	53.2201	56.2489	52.4138	58.7984	55.6457	53.084	0	19.2898		0.0520901	0.0331958	-0.0259936	0.0897523	0.150441	0.0454098
93.7	1.67266	43.3568	35.8205	36.7673	45.4833	45.6075	42.5825	47.6924	36.606	43.1327	42.0462	59.6378	50.6194	53.2153	56.2438	52.409	58.7931	55.6406	53.0792	0	19.2881		0.0520448	0.0331503	-0.0260391	0.0897072	0.150397	0.0453644
93.8	1.67818	43.3568	35.8205	36.7673	45.4833	45.6075	42.5825	47.6924	36.606	43.1327	42.0462	59.6324	50.6148	53.2105	56.2387	52.4042	58.7878	55.6356	53.0744	0	19.2863		0.0519995	0.033105	-0.0260844	0.0896622	0.150352	0.0453191
93.9	1.68432	43.3568	35.8205	36.7673	45.4833	45.6075	42.5825	47.6924	36.606	43.1327	42.0462	59.627	50.6102	53.2056	56.2336	52.3995	58.7824	55.6306	53.0696	0	19.2846		0.0519544	0.0330598	-0.0261296	0.0896173	0.150308	0.045274
94	1.69108	43.3568	35.8205	36.7673	45.4833	45.6075	42.5825	47.6924	36.606	43.1327	42.0462	59.6216	50.6057	53.2008	56.2285	52.3948	58.7771	55.6255	53.0648	0	19.2828		0.0519094	0.0330148	-0.0261747	0.0895725	0.150264	0.0452289
94.1	1.69846	43.3568	35.8205	36.7673	45.4833	45.6075	42.5825	47.6924	36.606	43.1327	42.0462	59.6163	50.6011	53.196	56.2235	52.39	58.7718	55.6205	53.06	0	19.2811		0.0518645	0.0329698	-0.0262197	0.0895278	0.15022	0.045184
94.2	1.70644	43.3568	35.8205	36.7673	45.4833	45.6075	42.5825	47.6924	36.606	43.1327	42.0462	59.6109	50.5966	53.1913	56.2184	52.3853	58.7666	55.6155	53.0552	0	19.2794		0.0518197	0.0329249	-0.0262646	0.0894833	0.150176	0.0451392
94.3	1.71501	43.3568	35.8205	36.7673	45.4833	45.6075	42.5825	47.6924	36.606	43.1327	42.0462	59.6056	50.592	53.1865	56.2134	52.3806	58.7613	55.6106	53.0505	0	19.2776		0.051775	0.0328801	-0.0263094	0.0894388	0.150132	0.0450944
94.4	1.72417	43.3568	35.8205	36.7673	45.4833	45.6075	42.5825	47.6924	36.606	43.1327	42.0462	59.6002	50.5875	53.1817	56.2084	52.376	58.756	55.6056	53.0457	0	19.2759		0.0517304	0.0328355	-0.0263541	0.0893945	0.150089	0.0450498
94.5	1.7339	43.3568	35.8205	36.7673	45.4833	45.6075	42.5825	47.6924	36.606	43.1327	42.0462	59.5949	50.583	53.177	56.2033	52.3713	58.7508	55.6006	53.041	0	19.2742		0.0516859	0.0327909	-0.0263986	0.0893502	0.150045	0.0450053
94.6	1.74419	43.3568	35.8205	36.7673	45.4833	45.6075	42.5825	47.6924	36.606	43.1327	42.0462	59.5896	50.5785	53.1723	56.1983	52.3666	58.7456	55.5957	53.0363	0	19.2725		0.0516416	0.0327465	-0.0264431	0.0893061	0.150001	0.0449609
94.7	1.75504	43.3568	35.8205	36.7673	45.4833	45.6075	42.5825	47.6924	36.606	43.1327	42.0462	59.5843	50.574	53.1676	56.1933	52.362	58.7404	55.5907	53.0316	0	19.2708		0.0515973	0.0327022	-0.0264874	0.0892621	0.149958	0.0449166
94.8	1.76642	43.3568	35.8205	36.7673	45.4833	45.6075	42.5825	47.6924	36.606	43.1327	42.0462	59.579	50.5695	53.1628	56.1884	52.3573	58.7352	55.5858	53.0269	0	19.2691		0.0515531	0.0326579	-0.0265317	0.0892182	0.149915	0.0448724
94.9	1.77832	43.3568	35.8205	36.7673	45.4833	45.6075	42.5825	47.6924	36.606	43.1327	42.0462	59.5738	50.5651	53.1581	56.1834	52.3527	58.73	55.5809	53.0222	0	19.2674		0.0515091	0.0326138	-0.0265758	0.0891743	0.149872	0.0448284
95	1.79073	43.3568	35.8205	36.7673	45.4833	45.6075	42.5825	47.6924	36.606	43.1327	42.0462	59.5685	50.5606	53.1535	56.1785	52.3481	58.7248	55.576	53.0175	0	19.2657		0.0514651	0.0325698	-0.0266199	0.0891306	0.149829	0.0447844
95.1	1.80364	43.3568	35.8205	36.7673	45.4833	45.6075	42.5825	47.6924	36.606	43.1327	42.0462	59.5633	50.5562	53.1488	56.1735	52.3435	58.7196	55.5711	53.0129	0	19.264		0.0514213	0.0325259	-0.0266638	0.089087	0.149786	0.0447405
95.2	1.81702	43.3568	35.8205	36.7673	45.4833	45.6075	42.5825	47.6924	36.606	43.1327	42.0462	59.5581	50.5517	53.1441	56.1686	52.3389	58.7145	55.5662	53.0082	0	19.2623		0.0513776	0.0324821	-0.0267076	0.0890435	0.149743	0.0446968
95.3	1.83086	43.3568	35.8205	36.7673	45.4833	45.6075	42.5825	47.6924	36.606	43.1327	42.0462	59.5529	50.5473	53.1395	56.1637	52.3343	58.7093	55.5614	53.0036	0	19.2606		0.0513339	0.0324384	-0.0267513	0.0890001	0.1497	0.0446531
95.4	1.84515	43.3568	35.8205	36.7673	45.4833	45.6075	42.5825	47.6924	36.606	43.1327	42.0462	59.5477	50.5429	53.1348	56.1588	52.3298	58.7042	55.5565	52.9989	0	19.2589		0.0512904	0.0323948	-0.0267949	0.0889568	0.149657	0.0446096
95.5	1.85987	43.3568	35.8205	36.7673	45.4833	45.6075	42.5825	47.6924	36.606	43.1327	42.0462	59.5425	50.5385	53.1302	56.1539	52.3252	58.6991	55.5517	52.9943	0	19.2572		0.051247	0.0323513	-0.0268384	0.0889136	0.149615	0.0445661
95.6	1.875	43.3568	35.8205	36.7673	45.4833	45.6075	42.5825	47.6924	36.606	43.1327	42.0462	59.5373	50.5341	53.1256	56.149	52.3207	58.694	55.5469	52.9897	0	19.2556		0.0512037	0.0323079	-0.0268818	0.0888705	0.149572	0.0445228
95.7	1.89052	43.3568	35.8205	36.7673	45.4833	45.6075	42.5825	47.6924	36.606	43.1327	42.0462	59.5322	50.5297	53.121	56.1441	52.3161	58.6889	55.5421	52.9851	0	19.2539		0.0511605	0.0322646	-0.0269251	0.0888276	0.14953	0.0444795
95.8	1.90641	43.3568	35.8205	36.7673	45.4833	45.6075	42.5825	47.6924	36.606	43.1327	42.0462	59.527	50.5254	53.1164	56.1393	52.3116	58.6838	55.5373	52.9806	0	19.2522		0.0511174	0.0322215	-0.0269683	0.0887847	0.149488	0.0444364
95.9	1.92266	43.3568	35.8205	36.7673	45.4833	45.6075	42.5825	47.6924	36.606	43.1327	42.0462	59.5219	50.521	53.1118	56.1345	52.3071	58.6788	55.5325	52.976	0	19.2506		0.0510743	0.0321784	-0.0270114	0.0887419	0.149445	0.0443934
96	1.93925	43.3568	35.8205	36.7673	45.4833	45.6075	42.5825	47.6924	36.606	43.1327	42.0462	59.5168	50.5167	53.1073	56.1296	52.3026	58.6737	55.5277	52.9714	0	19.2489		0.0510314	0.0321354	-0.0270544	0.0886992	0.149403	0.0443504
96.1	1.95615	43.3568	35.8205	36.7673	45.4833	45.6075	42.5825	47.6924	36.606	43.1327	42.0462	59.5116	50.5123	53.1027	56.1248	52.2981	58.6687	55.5229	52.9669	0	19.2473		0.0509887	0.0320926	-0.0270972	0.0886567	0.149361	0.0443076
96.2	1.97336	43.3568	35.8205	36.7673	45.4833	45.6075	42.5825	47.6924	36.606	43.1327	42.0462	59.5066	50.508	53.0982	56.12	52.2936	58.6637	55.5182	52.9624	0	19.2456		0.050946	0.0320498	-0.02714	0.0886142	0.14932	0.0442649
96.3	1.99084	43.3568	35.8205	36.7673	45.4833	45.6075	42.5825	47.6924	36.606	43.1327	42.0462	59.5015	50.5037	53.0936	56.1152	52.2892	58.6587	55.5134	52.9578	0	19.244		0.0509034	0.0320071	-0.0271827	0.0885718	0.149278	0.0442223
96.4	2.00858	43.3568	35.8205	36.7673	45.4833	45.6075	42.5825	47.6924	36.606	43.1327	42.0462	59.4964	50.4994	53.0891	56.1104	52.2847	58.6537	55.5087	52.9533	0	19.2423		0.0508609	0.0319646	-0.0272253	0.0885296	0.149236	0.0441797
96.5	2.02656	43.3568	35.8205	36.7673	45.4833	45.6075	42.5825	47.6924	36.606	43.1327	42.0462	59.4913	50.4951	53.0846	56.1057	52.2803	58.6487	55.504	52.9488	0	19.2407		0.0508185	0.0319221	-0.0272677	0.0884874	0.149195	0.0441373
96.6	2.04475	43.3568	35.8205	36.7673	45.4833	45.6075	42.5825	47.6924	36.606	43.1327	42.0462	59.4863	50.4908	53.0801	56.1009	52.2758	58.6437	55.4993	52.9443	0	19.2391		0.0507762	0.0318798	-0.0273101	0.0884453	0.149153	0.044095
96.7	2.06314	43.3568	35.8205	36.7673	45.4833	45.6075	42.5825	47.6924	36.606	43.1327	42.0462	59.4813	50.4865	53.0756	56.0962	52.2714	58.6388	55.4946	52.9399	0	19.2374		0.050734	0.0318375	-0.0273523	0.0884034	0.149112	0.0440528
96.8	2.0817	43.3568	35.8205	36.7673	45.4833	45.6075	42.5825	47.6924	36.606	43.1327	42.0462	59.4763	50.4823	53.0711	56.0914	52.267	58.6338	55.4899	52.9354	0	19.2358		0.0506919	0.0317954	-0.0273945	0.0883615	0.149071	0.0440107
96.9	2.10042	43.3568	35.8205	36.7673	45.4833	45.6075	42.5825	47.6924	36.606	43.1327	42.0462	59.4712	50.478	53.0667	56.0867	52.2626	58.6289	55.4852	52.9309	0	19.2342		0.05065	0.0317533	-0.0274366	0.0883198	0.149029	0.0439687
97	2.11926	43.3568	35.8205	36.7673	45.4833	45.6075	42.5825	47.6924	36.606	43.1327	42.0462	59.4663	50.4738	53.0622	56.082	52.2582	58.624	55.4806	52.9265	0	19.2326		0.0506081	0.0317114	-0.0274785	0.0882781	0.148988	0.0439268
97.1	2.13822	43.3568	35.8205	36.7673	45.4833	45.6075	42.5825	47.6924	36.606	43.1327	42.0462	59.4613	50.4696	53.0577	56.0773	52.2538	58.619	55.4759	52.9221	0	19.231		0.0505663	0.0316695	-0.0275204	0.0882365	0.148947	0.043885
97.2	2.15727	43.3568	35.8205	36.7673	45.4833	45.6075	42.5825	47.6924	36.606	43.1327	42.0462	59.4563	50.4653	53.0533	56.0726	52.2495	58.6141	55.4713	52.9176	0	19.2294		0.0505246	0.0316278	-0.0275621	0.0881951	0.148907	0.0438433
97.3	2.1764	43.3568	35.8205	36.7673	45.4833	45.6075	42.5825	47.6924	36.606	43.1327	42.0462	59.4513	50.4611	53.0489	56.0679	52.2451	58.6093	55.4667	52.9132	0	19.2278		0.0504831	0.0315862	-0.0276038	0.0881537	0.148866	0.0438017
97.4	2.19558	43.3568	35.8205	36.7673	45.4833	45.6075	42.5825	47.6924	36.606	43.1327	42.0462	59.4464	50.4569	53.0445	56.0633	52.2408	58.6044	55.4621	52.9088	0	19.2262		0.0504416	0.0315446	-0.0276453	0.0881125	0.148825	0.0437602
97.5	2.21479	43.3568	35.8205	36.7673	45.4833	45.6075	42.5825	47.6924	36.606	43.1327	42.0462	59.4415	50.4528	53.0401	56.0586	52.2364	58.5995	55.4575	52.9044	0	19.2246		0.0504002	0.0315032	-0.0276868	0.0880713	0.148785	0.0437188
97.6	2.23402	43.3568	35.8205	36.7673	45.4833	45.6075	42.5825	47.6924	36.606	43.1327	42.0462	59.4366	50.4486	53.0357	56.054	52.2321	58.5947	55.4529	52.9001	0	19.223		0.0503589	0.0314618	-0.0277281	0.0880302	0.148744	0.0436775
97.7	2.25325	43.3568	35.8205	36.7673	45.4833	45.6075	42.5825	47.6924	36.606	43.1327	42.0462	59.4316	50.4444	53.0313	56.0494	52.2278	58.5898	55.4483	52.8957	0	19.2214		0.0503177	0.0314206	-0.0277694	0.0879893	0.148704	0.0436363
97.8	2.27247	43.3568	35.8205	36.7673	45.4833	45.6075	42.5825	47.6924	36.606	43.1327	42.0462	59.4267	50.4403	53.0269	56.0447	52.2235	58.585	55.4437	52.8913	0	19.2198		0.0502767	0.0313795	-0.0278105	0.0879484	0.148664	0.0435952
97.9	2.29165	43.3568	35.8205	36.7673	45.4833	45.6075	42.5825	47.6924	36.606	43.1327	42.0462	59.4219	50.4361	53.0226	56.0401	52.2192	58.5802	55.4392	52.887	0	19.2182		0.0502357	0.0313384	-0.0278516	0.0879076	0.148623	0.0435542
98	2.31078	43.3568	35.8205	36.7673	45.4833	45.6075	42.5825	47.6924	36.606	43.1327	42.0462	59.417	50.432	53.0182	56.0355	52.2149	58.5754	55.4346	52.8826	0	19.2166		0.0501948	0.0312975	-0.0278925	0.087867	0.148583	0.0435133
98.1	2.32984	43.3568	35.8205	36.7673	45.4833	45.6075	42.5825	47.6924	36.606	43.1327	42.0462	59.4121	50.4279	53.0139	56.031	52.2107	58.5706	55.4301	52.8783	0	19.2151		0.050154	0.0312566	-0.0279334	0.0878264	0.148543	0.0434725
98.2	2.34882	43.3568	35.8205	36.7673	45.4833	45.6075	42.5825	47.6924	36.606	43.1327	42.0462	59.4073	50.4237	53.0096	56.0264	52.2064	58.5658	55.4256	52.874	0	19.2135		0.0501133	0.0312159	-0.0279741	0.0877859	0.148503	0.0434317
98.3	2.36769	43.3568	35.8205	36.7673	45.4833	45.6075	42.5825	47.6924	36.606	43.1327	42.0462	59.4025	50.4196	53.0053	56.0218	52.2022	58.5611	55.4211	52.8697	0	19.2119		0.0500728	0.0311752	-0.0280148	0.0877456	0.148464	0.0433911
98.4	2.38646	43.3568	35.8205	36.7673	45.4833	45.6075	42.5825	47.6924	36.606	43.1327	42.0462	59.3976	50.4156	53.001	56.0173	52.1979	58.5563	55.4166	52.8654	0	19.2104		0.0500323	0.0311347	-0.0280553	0.0877053	0.148424	0.0433506
98.5	2.40509	43.3568	35.8205	36.7673	45.4833	45.6075	42.5825	47.6924	36.606	43.1327	42.0462	59.3928	50.4115	52.9967	56.0127	52.1937	58.5516	55.4121	52.8611	0	19.2088		0.0499919	0.0310942	-0.0280958	0.0876651	0.148384	0.0433102
98.6	2.42358	43.3568	35.8205	36.7673	45.4833	45.6075	42.5825	47.6924	36.606	43.1327	42.0462	59.388	50.4074	52.9924	56.0082	52.1895	58.5468	55.4076	52.8569	0	19.2073		0.0499516	0.0310539	-0.0281362	0.087625	0.148345	0.0432699
98.7	2.44192	43.3568	35.8205	36.7673	45.4833	45.6075	42.5825	47.6924	36.606	43.1327	42.0462	59.3832	50.4033	52.9881	56.0037	52.1853	58.5421	55.4031	52.8526	0	19.2057		0.0499114	0.0310136	-0.0281764	0.087585	0.148305	0.0432297
98.8	2.46008	43.3568	35.8205	36.7673	45.4833	45.6075	42.5825	47.6924	36.606	43.1327	42.0462	59.3785	50.3993	52.9839	55.9992	52.1811	58.5374	55.3987	52.8484	0	19.2042		0.0498713	0.0309735	-0.0282166	0.0875452	0.148266	0.0431895
98.9	2.47807	43.3568	35.8205	36.7673	45.4833	45.6075	42.5825	47.6924	36.606	43.1327	42.0462	59.3737	50.3952	52.9796	55.9947	52.1769	58.5327	55.3942	52.8441	0	19.2026		0.0498313	0.0309334	-0.0282567	0.0875054	0.148227	0.0431495
99	2.49585	43.3568	35.8205	36.7673	45.4833	45.6075	42.5825	47.6924	36.606	43.1327	42.0462	59.369	50.3912	52.9754	55.9902	52.1727	58.528	55.3898	52.8399	0	19.2011		0.0497914	0.0308934	-0.0282966	0.0874657	0.148188	0.0431096
99.1	2.51343	43.3568	35.8205	36.7673	45.4833	45.6075	42.5825	47.6924	36.606	43.1327	42.0462	59.3642	50.3872	52.9711	55.9858	52.1686	58.5234	55.3854	52.8357	0	19.1996		0.0497516	0.0308536	-0.0283365	0.0874261	0.148149	0.0430698
99.2	2.53079	43.3568	35.8205	36.7673	45.4833	45.6075	42.5825	47.6924	36.606	43.1327	42.0462	59.3595	50.3832	52.9669	55.9813	52.1644	58.5187	55.381	52.8315	0	19.1981		0.0497119	0.0308138	-0.0283763	0.0873866	0.14811	0.04303
99.3	2.54791	43.3568	35.8205	36.7673	45.4833	45.6075	42.5825	47.6924	36.606	43.1327	42.0462	59.3548	50.3792	52.9627	55.9769	52.1603	58.5141	55.3766	52.8273	0	19.1965		0.0496723	0.0307741	-0.028416	0.0873471	0.148071	0.0429904
99.4	2.56479	43.3568	35.8205	36.7673	45.4833	45.6075	42.5825	47.6924	36.606	43.1327	42.0462	59.3501	50.3752	52.9585	55.9724	52.1561	58.5094	55.3722	52.8231	0	19.195		0.0496327	0.0307345	-0.0284556	0.0873078	0.148032	0.0429508
99.5	2.58141	43.3568	35.8205	36.7673	45.4833	45.6075	42.5825	47.6924	36.606	43.1327	42.0462	59.3454	50.3712	52.9543	55.968	52.152	58.5048	55.3678	52.8189	0	19.1935		0.0495933	0.0306951	-0.028495	0.0872686	0.147994	0.0429114
99.6	2.59776	43.3568	35.8205	36.7673	45.4833	45.6075	42.5825	47.6924	36.606	43.1327	42.0462	59.3407	50.3672	52.9502	55.9636	52.1479	58.5002	55.3634	52.8147	0	19.192		0.049554	0.0306557	-0.0285344	0.0872295	0.147955	0.042872
99.7	2.61384	43.3568	35.8205	36.7673	45.4833	45.6075	42.5825	47.6924	36.606	43.1327	42.0462	59.336	50.3633	52.946	55.9592	52.1438	58.4956	55.3591	52.8106	0	19.1905		0.0495147	0.0306164	-0.0285737	0.0871904	0.147917	0.0428328
99.8	2.62963	43.3568	35.8205	36.7673	45.4833	45.6075	42.5825	47.6924	36.606	43.1327	42.0462	59.3314	50.3593	52.9418	55.9548	52.1397	58.491	55.3547	52.8064	0	19.189		0.0494756	0.0305772	-0.0286129	0.0871515	0.147878	0.0427936
99.9	2.64513	43.3568	35.8205	36.7673	45.4833	45.6075	42.5825	47.6924	36.606	43.1327	42.0462	60.1535	50.3554	52.9377	55.9504	52.1356	58.4864	55.3504	52.8023	0	19.1875		0.0509227	0.0320576	-0.0269123	0.0885108	0.149078	0.0436575
100	2.66033	43.3568	35.8205	36.7673	45.4833	45.6075	42.5825	47.6924	36.606	43.1327	42.0462	61.0867	50.3514	52.9336	55.946	52.1315	58.4818	55.3461	52.7982	0	19.186		0.052564	0.0337366	-0.0249848	0.0900531	0.15044	0.0446409
100.1	2.67522	43.3568	35.8205	36.7673	45.4833	45.6075	42.5825	47.6924	36.606	43.1327	42.0462	62.3479	50.3475	52.9294	55.9417	52.1275	58.4773	55.3418	52.7941	0	19.1845		0.0547841	0.0360074	-0.022381	0.09214	0.152286	0.0459787
100.2	2.68981	43.3568	35.8205	36.7673	45.4833	45.6075	42.5825	47.6924	36.606	43.1327	42.0462	64.1388	50.3436	52.9253	55.9373	52.1234	58.4727	55.3375	52.79	0	19.183		0.0579314	0.0392262	-0.0186942	0.0950998	0.154905	0.047886
100.3	2.70407	43.3568	35.8205	36.7673	45.4833	45.6075	42.5825	47.6924	36.606	43.1327	42.0462	66.6362	50.3397	52.9212	55.933	52.1194	58.4682	55.3332	52.7859	0	19.1815		0.0622972	0.0436907	-0.0135859	0.0992071	0.158543	0.0505462
100.4	2.71802	43.3568	35.8205	36.7673	45.4833	45.6075	42.5825	47.6924	36.606	43.1327	42.0462	69.9837	50.3358	52.9171	55.9287	52.1154	58.4637	55.3289	52.7818	0	19.18		0.0680961	0.0496202	-0.006809	0.104664	0.163381	0.0541
100.5	2.73166	43.3568	35.8205	36.7673	45.4833	45.6075	42.5825	47.6924	36.606	43.1327	42.0462	74.2853	50.3319	52.9131	55.9244	52.1113	58.4592	55.3246	52.7777	0	19.1785		0.0754515	0.0571409	0.00177526	0.111589	0.169525	0.0586372
100.6	2.74497	43.3568	35.8205	36.7673	45.4833	45.6075	42.5825	47.6924	36.606	43.1327	42.0462	79.6001	50.3281	52.909	55.9201	52.1073	58.4547	55.3204	52.7737	0	19.177		0.0843873	0.0662769	0.0121879	0.120005	0.176999	0.0641909
100.7	2.75798	43.3568	35.8205	36.7673	45.4833	45.6075	42.5825	47.6924	36.606	43.1327	42.0462	85.9399	50.3242	52.9049	55.9158	52.1033	58.4502	55.3161	52.7696	0	19.1756		0.0948286	0.0769513	0.0243332	0.129844	0.185746	0.0707368
100.8	2.77067	43.3568	35.8205	36.7673	45.4833	45.6075	42.5825	47.6924	36.606	43.1327	42.0462	93.2687	50.3203	52.9009	55.9115	52.0993	58.4457	55.3119	52.7656	0	19.1741		0.10661	0.0889947	0.0380099	0.14095	0.195633	0.0781955
100.9	2.78305	43.3568	35.8205	36.7673	45.4833	45.6075	42.5825	47.6924	36.606	43.1327	42.0462	101.504	50.3165	52.8968	55.9072	52.0954	58.4412	55.3077	52.7615	0	19.1726		0.119491	0.102161	0.0529309	0.153101	0.206464	0.0864389
101	2.79512	43.8872	35.8205	36.7673	45.4833	45.6075	42.5825	47.6924	36.606	43.1327	42.0462	110.521	50.3127	52.8928	55.903	52.0914	58.4368	55.3035	52.7575	0	19.1712		0.13214	0.11615	0.0676978	0.164971	0.217996	0.0946733
101.1	2.8069	44.489	35.8205	36.7673	45.4833	45.6075	42.5825	47.6924	36.606	43.1327	42.0462	120.158	50.3088	52.8888	55.8987	52.0874	58.4324	55.2992	52.7535	0	19.1697		0.145142	0.130629	0.0828471	0.177175	0.229957	0.10325
101.2	2.81838	45.3013	35.8205	36.7673	45.4833	45.6075	42.5825	47.6924	36.606	43.1327	42.0462	130.224	50.305	53.6856	55.8945	52.0835	58.4279	55.2951	52.7495	0	19.1683		0.159018	0.146401	0.097723	0.189131	0.243018	0.112548
101.3	2.82957	46.4536	35.8205	36.7673	45.4833	45.6075	42.5825	47.6924	36.606	43.1327	42.0462	140.51	50.3012	54.5901	55.8902	52.0795	58.4235	55.2909	52.7455	0	19.1668		0.172158	0.162061	0.111713	0.200296	0.256017	0.121522
101.4	2.84048	48.0595	35.8205	36.7673	45.4833	45.6075	42.5825	47.6924	36.606	43.1327	42.0462	150.795	50.2974	55.8123	55.886	52.0756	58.4191	55.2867	52.7415	0	19.1654		0.184335	0.177576	0.124279	0.210192	0.268926	0.130025
101.5	2.85112	50.2113	36.6366	36.7673	45.4833	45.6075	42.5825	47.6924	36.606	43.1327	42.0462	160.857	50.2936	57.5476	55.8818	52.0717	58.4147	55.2825	52.7376	0	19.1639		0.195359	0.192898	0.13343	0.216893	0.280155	0.136989
101.6	2.86149	52.9758	37.5623	36.7673	45.4833	45.6075	42.5825	47.6924	36.606	43.1327	42.0462	170.487	50.2898	59.9672	55.8776	52.0678	58.4103	55.2784	52.7336	0	19.1625		0.205092	0.207969	0.14023	0.221485	0.291026	0.143141
101.7	2.87161	56.3911	38.8121	36.7673	46.1743	45.6075	42.5825	47.6924	36.606	43.1327	42.0462	179.494	50.2861	63.2105	55.8734	52.0639	59.1364	55.2742	52.7296	0	19.1611		0.21306	0.22144	0.142832	0.223412	0.301094	0.148006
101.8	2.88148	60.465	40.585	37.6681	46.9582	45.6075	42.5825	47.6924	36.606	43.1327	42.0462	187.717	50.2823	67.3779	55.8692	52.06	59.9606	55.2701	52.7257	0	19.1596		0.217987	0.232726	0.141987	0.222279	0.308312	0.150492
101.9	2.89112	65.1744	43.0556	38.6901	48.0164	45.6075	42.5825	47.6924	36.606	43.1327	42.0462	195.032	50.2786	72.5268	55.8651	52.0561	61.0747	55.266	52.7218	0	19.1582		0.221277	0.242913	0.13719	0.217872	0.313831	0.151301
102	2.90054	70.4664	46.3661	40.0696	49.5176	45.6075	42.5825	47.6924	36.606	43.1327	42.0462	201.358	50.2748	78.6687	55.8609	52.0522	62.6568	56.05	52.7178	0	19.1568		0.222575	0.251251	0.129211	0.21102	0.317726	0.15071
102.1	2.90974	76.2612	50.6192	42.0266	51.6096	45.6075	42.5825	47.6924	36.606	43.1327	42.0462	206.657	50.2711	85.7686	55.8568	52.0484	64.863	56.9399	52.7139	0	19.1553		0.221671	0.257113	0.117153	0.201099	0.318864	0.14797
102.2	2.91873	82.455	55.8735	44.7539	54.4128	45.6075	42.5825	47.6924	36.606	43.1327	42.0462	210.943	50.2674	93.7467	56.7868	52.0445	67.8205	58.1426	53.8577	0	19.1539		0.21944	0.262123	0.102999	0.190874	0.317948	0.144742
102.3	2.92754	88.9258	62.1411	48.4082	58.0141	45.6075	42.5825	47.6924	36.606	43.9357	42.0462	214.276	51.2551	102.482	57.8422	52.0407	71.6209	59.8502	55.1555	0	19.1525		0.214877	0.263698	0.0874193	0.180055	0.313857	0.139805
102.4	2.93616	95.5384	69.3863	53.1031	62.4633	45.6075	42.5825	47.6924	37.3523	44.8465	42.0462	216.758	52.376	111.818	59.2684	52.0368	76.3166	62.2312	56.9087	0	19.1511		0.207641	0.261438	0.0694921	0.167892	0.306346	0.133265
102.5	2.94462	102.151	77.528	58.9032	67.7704	46.3622	42.5825	47.6924	38.1989	46.0762	42.0462	218.535	53.8903	121.57	61.293	52.7853	81.918	65.4228	59.3972	0	19.1497		0.198228	0.255807	0.0517921	0.15585	0.297589	0.126336
102.6	2.95291	108.622	86.4431	65.8218	73.9054	47.2184	42.5825	47.6924	39.3417	47.8206	42.7648	219.783	56.0398	131.535	64.1158	53.6348	88.3932	69.5239	62.8664	0	19.1483		0.187924	0.248253	0.0346091	0.145034	0.286363	0.119091
102.7	2.96107	114.816	95.9722	73.8196	80.7994	48.3742	42.5825	47.6924	40.963	50.2515	43.5801	220.702	59.0365	141.498	67.8993	54.7828	95.6694	74.5909	67.5156	0	19.1469		0.176874	0.238998	0.0198536	0.13696	0.274242	0.112518
102.8	2.96908	120.61	105.927	82.8069	88.3483	50.0138	42.5825	48.3623	43.2223	53.5088	44.6806	221.511	63.0528	151.246	72.7607	56.4128	103.636	80.6352	73.4892	0	19.1455		0.165313	0.227558	0.00735207	0.131777	0.260818	0.106328
102.9	2.97698	125.902	116.101	92.648	96.4171	52.2987	42.5825	49.1222	46.2496	57.6936	46.2417	221.495	68.2131	160.576	78.767	58.6857	112.151	87.6223	80.8694	0	19.1441		0.152815	0.214558	-0.00280924	0.128602	0.246723	0.100613
103	2.98476	130.612	126.274	103.167	104.847	55.3603	42.5825	50.1481	50.1389	62.8635	48.4173	221.479	74.5887	169.302	85.9316	61.7322	121.046	95.4736	89.6726	0	19.1427		0.140213	0.20089	-0.00997239	0.127832	0.232705	0.0957262
103.1	2.99244	134.686	136.229	114.156	113.461	59.2937	42.5825	51.6033	54.9438	69.0303	51.3325	221.463	82.1935	177.268	94.2136	65.6468	130.134	104.07	99.8484	0	19.1413		0.127676	0.186816	-0.0145363	0.128967	0.218926	0.0915069
103.2	3.00004	138.101	145.758	125.386	122.075	64.153	42.5825	53.6314	60.6753	76.1591	55.0777	221.447	90.9843	184.356	103.52	70.4834	139.221	113.258	111.283	0	19.1399		0.115362	0.172625	-0.0169757	0.131464	0.205546	0.0877991
103.3	3.00757	140.865	154.673	136.616	130.505	69.9494	42.5825	56.3487	67.3008	84.17	59.7046	221.431	100.862	190.484	113.709	76.2529	148.112	122.855	123.802	0	19.1386		0.103413	0.158587	-0.0177942	0.134793	0.192704	0.084459
103.4	3.01503	143.017	162.815	147.605	138.574	76.65	42.5825	59.8399	74.7461	92.9418	65.2237	221.415	111.678	195.618	124.6	82.9222	156.62	132.662	137.182	0	19.1372		0.0919452	0.144937	-0.0174852	0.138475	0.180511	0.0813605
103.5	3.02244	144.623	170.06	158.124	146.123	84.1796	42.5825	64.1529	82.8986	102.318	71.6037	221.399	123.237	199.771	135.976	90.4165	164.579	142.467	151.159	0	19.1358		0.081048	0.13186	-0.0165034	0.142103	0.169038	0.0783979
103.6	3.02981	145.775	176.328	167.965	153.017	92.4244	42.5825	69.2976	91.6126	112.113	78.7731	221.383	135.311	203	147.599	98.622	171.845	152.061	165.441	0	19.1344		0.0707852	0.119491	-0.0152489	0.145349	0.15833	0.075486
103.7	3.03716	146.588	181.582	176.952	159.152	101.237	42.5825	75.2448	100.716	122.123	86.6235	221.368	147.649	205.406	159.222	107.392	178.309	161.242	179.72	0	19.1331		0.0611998	0.107921	-0.0140595	0.147968	0.148401	0.0725591
103.8	3.04449	147.19	185.835	184.95	164.459	110.444	42.5825	81.9279	110.019	132.133	95.0147	221.352	159.985	207.128	170.593	116.553	183.898	169.829	193.691	0	19.1317		0.0523179	0.0972064	-0.0132108	0.149783	0.139246	0.0695686
103.9	3.05182	147.72	189.146	191.869	168.908	119.852	42.5825	89.2458	119.322	141.928	103.781	221.336	172.055	208.337	181.475	125.914	188.581	177.67	207.062	0	19.1304		0.0441527	0.0873731	-0.0129195	0.150679	0.130846	0.0664814
104	3.05915	147.72	191.616	197.669	172.509	129.261	43.2784	97.0677	128.426	151.304	112.739	221.32	183.605	209.229	191.654	135.273	192.368	184.645	219.568	0	19.129		0.037032	0.0784289	-0.0129954	0.150528	0.123173	0.0632439
104.1	3.0665	147.72	193.389	202.364	175.312	138.468	44.0678	105.239	137.14	160.075	121.698	221.305	194.41	210.014	200.948	144.43	195.313	190.676	230.987	0	19.1276		0.0307148	0.0703674	-0.0138134	0.149446	0.116193	0.0599259
104.2	3.07388	147.72	194.639	206.018	177.404	147.28	45.1334	113.59	145.292	168.086	130.464	221.289	204.274	209.999	209.215	153.194	197.507	195.729	241.145	0	19.1263		0.0248183	0.0627575	-0.0153833	0.147398	0.109495	0.0562342
104.3	3.08129	147.72	195.565	208.745	178.906	155.525	46.6451	121.941	152.738	175.215	138.855	221.274	213.05	209.984	216.364	161.391	199.077	199.816	249.929	0	19.1249		0.0196764	0.0558694	-0.0176903	0.144388	0.103308	0.0523542
104.4	3.08874	147.72	196.381	210.702	179.964	163.055	48.7517	130.112	159.363	181.382	146.706	221.258	220.638	209.969	222.354	168.875	200.179	202.994	257.289	0	19.1236		0.0152191	0.0495944	-0.0206977	0.140445	0.0975201	0.0482363
104.5	3.09624	147.72	196.381	212.082	180.748	169.755	51.5745	137.934	165.095	186.552	153.875	221.28	226.996	209.955	227.199	175.533	200.992	205.361	263.242	0	19.1223		0.0113903	0.0438498	-0.0238563	0.13616	0.0924864	0.0441503
104.6	3.10379	147.72	196.381	213.104	181.439	175.552	55.2009	145.252	169.9	190.737	160.255	221.307	232.139	209.94	230.966	181.29	201.707	207.056	267.871	0	19.1209		0.00809787	0.0385313	-0.0274332	0.131249	0.087804	0.039877
104.7	3.11138	147.72	196.381	214.005	181.439	180.411	59.6812	151.935	173.789	193.994	165.774	221.349	236.138	209.925	233.773	186.114	201.693	208.246	271.321	0	19.1196		0.00525075	0.0339203	-0.0308451	0.125936	0.0834934	0.0354931
104.8	3.11903	147.72	196.381	214.005	181.439	184.344	65.0254	157.883	176.816	196.425	170.401	221.415	239.118	209.911	235.783	190.015	201.679	209.124	273.791	0	19.1183		0.00324021	0.0301649	-0.0341526	0.120457	0.0800304	0.0313762
104.9	3.12674	147.72	196.381	214.005	181.439	187.406	71.2032	163.027	179.076	198.169	174.146	221.513	241.251	209.896	237.194	193.049	201.665	209.896	275.526	0	19.1169		0.00166968	0.0269695	-0.037074	0.115054	0.0771233	0.0274119
105	3.13449	147.72	196.381	214.005	181.439	189.691	78.1454	167.34	180.697	199.399	177.061	221.65	242.75	209.882	238.235	195.309	201.651	209.882	276.806	0	19.1156		0.000546877	0.0244424	-0.0398025	0.109609	0.0745435	0.0235125
105.1	3.14229	147.72	196.381	214.005	181.439	191.33	85.747	170.831	181.84	200.31	179.237	221.83	243.856	209.867	239.151	196.927	201.637	209.867	277.932	0	19.1143		-0.000135359	0.0226726	-0.0417961	0.104601	0.0726004	0.0199893
105.2	3.15014	147.72	196.381	214.005	181.439	192.486	93.8722	173.549	182.686	201.113	180.798	222.056	244.828	209.853	239.135	198.063	201.623	209.853	277.913	0	19.113		-0.000873414	0.0207379	-0.0436124	0.099216	0.0708874	0.0162801
105.3	3.15802	147.72	196.381	214.005	181.439	193.342	102.361	175.577	183.432	201.113	181.899	222.328	244.811	209.838	239.118	198.901	201.609	209.838	277.894	0	19.1117		-0.00149423	0.0192422	-0.0453156	0.0937533	0.0696056	0.0128261
105.4	3.16595	147.72	196.381	214.005	181.439	194.097	111.035	177.032	183.432	201.113	182.714	222.646	244.795	209.824	239.102	199.638	201.596	209.824	277.875	0	19.1104		-0.00171621	0.0183867	-0.0462406	0.0888273	0.0689989	0.00980858
105.5	3.17391	147.72	196.381	214.005	181.439	194.097	119.71	178.058	183.432	201.113	183.432	223.004	244.778	209.81	239.085	199.625	201.582	209.81	277.856	0	19.1091		-0.00158326	0.0180637	-0.0468971	0.0843766	0.0683539	0.00697348
105.6	3.1819	147.72	196.381	214.005	181.439	194.097	128.198	178.818	183.432	201.113	183.432	223.398	244.761	209.795	239.069	199.611	201.568	209.795	277.837	0	19.1078		-0.00143442	0.0178712	-0.0470757	0.0804136	0.0681465	0.0044883
105.7	3.1899	147.72	196.381	213.977	181.439	194.097	136.323	179.488	183.432	201.113	183.432	223.82	244.745	209.781	239.053	199.598	201.554	209.781	277.818	0	19.1065		-0.00126085	0.0177416	-0.0471977	0.0766665	0.0680004	0.00215611
105.8	3.19793	147.72	196.47	213.947	181.439	194.097	143.925	179.488	183.432	201.113	183.432	224.262	244.728	209.767	239.037	199.584	201.541	209.767	277.799	0	19.1052		-0.00107691	0.0179121	-0.0470396	0.0731613	0.0681128	0.000144263
105.9	3.20597	147.72	196.572	213.905	181.439	194.097	150.867	179.488	183.432	201.113	183.432	224.714	244.711	209.753	239.02	199.571	201.527	209.753	277.675	0	19.1039		-0.000883685	0.0180472	-0.0469361	0.0699466	0.0682284	-0.00170539
106	3.21401	147.72	196.709	213.846	181.439	194.097	157.045	179.488	183.432	201.113	183.432	225.165	244.695	209.739	239.004	199.557	201.513	209.739	277.536	0	19.1026		-0.000682696	0.018184	-0.0468564	0.0670882	0.0683362	-0.00334863
106.1	3.22205	147.72	196.904	213.763	181.439	194.097	162.389	179.488	183.432	201.113	183.432	225.607	244.678	209.917	238.988	199.544	201.5	209.724	277.355	0	19.1013		-0.000389856	0.0183895	-0.04683	0.0645868	0.0684977	-0.00473076
106.2	3.23008	147.72	197.175	213.653	181.439	194.097	166.869	179.488	183.432	201.113	183.432	226.029	244.662	210.121	238.972	199.53	201.486	209.71	277.106	0	19.1		-8.17921e-05	0.0185816	-0.0468838	0.0624276	0.0686408	-0.0059048
106.3	3.2381	147.72	197.538	213.511	181.577	194.097	170.496	179.488	183.432	201.113	183.432	226.423	244.646	210.402	238.956	199.517	201.473	209.696	276.767	0	19.0987		0.000200043	0.0187097	-0.0471053	0.0605812	0.0687757	-0.00691049
106.4	3.2461	147.72	198.005	213.336	181.734	194.097	173.319	179.488	183.432	201.113	183.432	226.781	244.629	210.807	238.94	199.503	201.459	209.682	276.319	0	19.0975		0.000527537	0.0188355	-0.0474571	0.0590052	0.0689135	-0.00772692
106.5	3.25407	147.72	198.582	213.128	181.946	194.097	175.425	179.488	183.432	200.984	183.432	227.098	244.762	211.376	238.984	199.49	201.446	209.668	275.749	0	19.0962		0.00105075	0.0190956	-0.0478925	0.0577309	0.069198	-0.00829224
106.6	3.26201	148.071	199.27	212.886	182.246	194.097	176.937	179.488	183.432	200.837	183.432	227.37	244.915	212.143	239.035	199.477	201.433	209.654	275.05	0	19.0949		0.00148038	0.0193604	-0.0486619	0.0564605	0.0695236	-0.00881723
106.7	3.26992	148.469	200.065	212.615	182.665	194.097	178.003	179.488	183.432	200.639	183.432	227.596	245.127	213.132	239.11	199.464	201.419	209.64	274.218	0	19.0936		0.0019867	0.019662	-0.0496174	0.0552872	0.0699342	-0.00923825
106.8	3.27779	149.007	200.959	212.318	183.226	193.489	178.792	179.488	183.432	200.359	183.432	227.776	245.435	214.358	239.222	199.45	201.756	209.627	273.261	0	19.0924		0.0029846	0.0202946	-0.0507867	0.0543957	0.0704691	-0.00934481
106.9	3.28561	149.769	201.937	212	183.947	192.8	179.488	179.488	183.588	199.968	183.432	227.913	245.87	215.823	239.386	199.437	202.14	209.72	272.187	0	19.0911		0.00402077	0.0209898	-0.0522036	0.0534246	0.0711354	-0.009424
107	3.29339	150.832	202.983	211.669	184.838	191.869	179.488	179.488	183.764	199.444	183.432	228.011	246.459	217.518	239.61	199.424	202.663	209.829	271.013	0	19.0899		0.0052492	0.0218977	-0.0538588	0.0527423	0.0719816	-0.00923685
107.1	3.30111	152.256	204.076	211.33	185.9	190.549	179.488	179.488	184.002	198.771	183.588	228.078	247.22	219.424	239.903	199.411	203.41	209.98	269.76	0	19.0886		0.00673535	0.0230823	-0.0558212	0.0520241	0.0729509	-0.00895163
107.2	3.30877	154.086	205.193	210.991	187.128	188.709	179.488	179.488	184.34	197.94	183.764	228.12	248.164	221.513	240.269	199.398	204.457	210.2	268.452	0	19.0874		0.00853144	0.0245943	-0.0580142	0.0513941	0.0741017	-0.00847943
107.3	3.31637	156.346	206.309	210.659	188.508	186.243	179.488	179.488	184.81	196.948	184.002	228.148	249.293	223.746	240.708	199.385	205.864	210.513	267.115	0	19.0861		0.010674	0.0264694	-0.0604299	0.0508915	0.0754077	-0.0077878
107.4	3.3239	159.042	207.402	210.341	190.019	183.076	179.488	179.623	185.44	195.802	184.34	228.17	250.601	226.079	241.218	199.372	207.675	210.936	265.779	0	19.0849		0.0131821	0.0286675	-0.0631097	0.0505496	0.0767774	-0.00689112
107.5	3.33137	162.158	208.448	210.044	191.635	179.163	179.488	179.776	186.25	194.514	184.81	228.155	252.072	228.464	241.793	199.359	209.915	211.483	264.471	0	19.0836		0.0160386	0.0312235	-0.0659911	0.0503765	0.0782059	-0.00575974
107.6	3.33876	165.66	209.427	209.773	193.322	174.495	179.488	179.983	187.251	193.103	185.44	228.14	253.684	230.848	242.424	199.346	212.59	212.163	263.219	0	19.0824		0.0192388	0.0341172	-0.069036	0.0504001	0.0796451	-0.00439794
107.7	3.34607	169.495	210.32	209.532	195.047	169.099	179.488	180.277	188.444	191.596	186.25	228.126	255.409	233.181	243.099	199.675	215.683	212.976	262.047	0	19.0811		0.0227455	0.0372973	-0.0722168	0.0506236	0.0811564	-0.00273968
107.8	3.35331	173.594	211.115	209.323	196.771	163.035	179.488	180.686	189.824	190.02	187.251	228.111	257.211	235.413	243.805	200.05	219.161	213.918	260.975	0	19.0799		0.0265073	0.0406997	-0.0754986	0.0510408	0.0825722	-0.000900209
107.9	3.36047	177.876	211.803	209.148	198.458	156.396	179.488	181.234	191.374	188.411	188.444	228.096	259.052	237.499	244.527	200.561	222.97	214.979	260.019	0	19.0787		0.0304615	0.0442496	-0.0788417	0.0516362	0.0838708	0.00110098
108	3.36754	182.252	212.38	209.006	200.074	149.299	179.488	181.939	193.071	186.801	189.824	228.082	260.893	239.404	245.249	201.291	227.041	216.141	259.19	0	19.0775		0.034537	0.0478657	-0.0822036	0.0523861	0.085036	0.0032366
108.1	3.37452	186.628	212.847	208.896	201.585	141.885	179.488	182.809	194.886	185.226	191.374	228.067	262.695	241.096	245.956	202.314	231.295	217.384	258.493	0	19.0762		0.0386579	0.0514631	-0.0855413	0.0532598	0.0860579	0.0054729
108.2	3.38142	190.91	213.21	208.813	202.965	134.308	179.488	183.847	196.781	183.718	193.071	228.052	264.418	242.558	246.631	203.688	235.642	218.683	257.925	0	19.075		0.042747	0.0549578	-0.0888135	0.0542209	0.0869332	0.00777146
108.3	3.38822	195.009	213.482	208.754	204.193	126.732	179.488	185.047	198.719	182.308	194.886	228.038	266.029	243.781	247.261	205.458	239.989	220.011	257.48	0	19.0738		0.0467292	0.0582699	-0.0919825	0.055229	0.0876653	0.010091
108.4	3.39492	198.844	213.676	208.713	205.255	119.318	179.488	186.395	200.656	181.02	196.781	228.023	267.499	244.768	247.836	207.646	244.241	221.339	257.143	0	19.0726		0.0505347	0.061328	-0.0950161	0.0562421	0.0882642	0.0123895
108.5	3.40152	202.346	213.813	208.682	206.146	112.221	179.488	187.871	202.551	179.873	198.719	228.009	268.805	245.533	248.345	210.259	248.31	222.638	256.897	0	19.0714		0.0541018	0.0640721	-0.0978882	0.0572179	0.0887459	0.0146261
108.6	3.40801	205.462	213.915	208.654	206.867	105.581	179.562	189.45	204.366	178.882	200.656	227.994	269.932	246.1	248.784	213.281	252.116	223.88	256.719	0	19.0702		0.0573795	0.0664566	-0.100581	0.0580827	0.0891314	0.0167431
108.7	3.41439	208.158	214.005	208.654	207.428	99.5177	179.646	191.098	206.063	178.05	202.551	227.98	270.874	246.502	249.149	216.678	255.59	225.042	256.583	0	19.0689		0.0603159	0.0684386	-0.103082	0.0588289	0.0894331	0.0187164
108.8	3.42063	210.418	214.005	208.654	207.847	94.1218	179.76	192.783	207.613	177.378	204.366	227.966	271.634	246.781	249.442	220.399	258.679	226.101	256.461	0	19.0677		0.062896	0.0700163	-0.105351	0.059462	0.089729	0.020546
108.9	3.42674	212.248	214.005	208.654	208.147	89.454	179.921	194.468	208.993	176.854	206.063	227.951	272.221	246.984	249.666	224.377	261.348	227.042	256.445	0	19.0665		0.0651083	0.0712426	-0.107359	0.0599676	0.0900184	0.0222182
109	3.4327	213.672	214.005	208.654	208.359	85.5408	180.146	196.117	210.186	176.463	207.613	228.207	272.655	247.16	249.829	228.533	263.584	227.854	256.429	0	19.0654		0.0670636	0.0722174	-0.109017	0.0604076	0.0904293	0.0237694
109.1	3.4385	214.734	214.005	208.654	208.516	82.3733	180.447	197.695	211.187	176.182	208.993	228.498	272.961	247.145	249.942	232.779	265.39	228.533	256.413	0	19.0642		0.0686041	0.0728134	-0.11044	0.0606941	0.090841	0.0250898
109.2	3.44412	215.497	214.005	208.654	208.654	79.9078	180.834	199.171	211.997	175.985	210.186	228.897	273.172	247.13	250.017	237.025	266.791	229.079	256.397	0	19.063		0.0698493	0.0731817	-0.111601	0.0608677	0.091357	0.0262444
109.3	3.44956	216.035	214.005	208.654	208.654	78.0678	181.312	200.52	212.627	175.838	211.187	229.469	273.324	247.114	250.069	241.18	267.833	229.501	256.381	0	19.0618		0.070927	0.0734797	-0.112425	0.0609743	0.0920094	0.0272985
109.4	3.45479	216.433	214.005	208.654	208.654	76.7474	181.883	201.719	213.097	175.709	211.997	230.271	273.456	247.099	250.112	245.155	268.576	229.812	256.365	0	19.0606		0.0718584	0.073753	-0.112947	0.0610626	0.0928234	0.0282551
109.5	3.45981	216.784	214.005	208.654	208.654	75.8167	182.542	202.757	213.435	175.709	212.627	231.351	273.439	247.083	250.097	248.873	269.095	230.032	256.349	0	19.0594		0.0725752	0.0739508	-0.113247	0.0610887	0.0936786	0.0290609
109.6	3.46458	216.784	214.005	208.654	208.654	75.1272	183.283	203.628	213.673	175.709	213.097	232.742	273.422	247.068	250.081	252.266	269.475	230.182	256.333	0	19.0582		0.0734535	0.0742834	-0.113124	0.0613389	0.0946745	0.0299283
109.7	3.46911	216.784	214.005	208.668	208.654	74.5195	184.094	204.332	213.849	175.709	213.435	234.464	273.405	247.053	250.066	255.284	269.808	230.29	256.317	0	19.0571		0.0744264	0.0748065	-0.112722	0.0617212	0.0957762	0.0308106
109.8	3.47337	216.784	214.005	208.683	208.654	74.5195	184.961	204.88	214.005	175.709	213.673	236.521	273.388	247.038	250.05	257.892	269.791	230.384	256.302	0	19.0559		0.0751257	0.0752626	-0.112058	0.0619867	0.0969541	0.0314812
109.9	3.47734	216.784	214.005	208.704	208.654	74.5195	185.867	205.289	214.005	175.709	213.849	238.9	273.372	247.023	250.035	260.076	269.775	230.369	255.21	0	19.0547		0.0760172	0.0755539	-0.111675	0.0619927	0.0981991	0.0319169
110	3.48101	216.784	214.005	208.733	208.654	74.5195	186.792	205.583	214.005	175.709	214.005	241.576	273.355	247.007	250.02	261.84	269.758	230.355	253.974	0	19.0535		0.0770179	0.0759532	-0.111167	0.0620586	0.0994502	0.0323144
110.1	3.48436	216.784	214.005	208.773	208.654	74.5195	187.718	205.79	214.005	175.709	214.005	244.506	273.338	246.992	250.004	263.21	269.742	230.341	252.31	0	19.0524		0.0781099	0.0763189	-0.110648	0.062126	0.100744	0.0326329
110.2	3.48737	216.784	214.005	208.828	208.654	74.5195	188.624	205.943	214.005	175.709	214.005	247.639	273.511	246.977	249.989	264.228	269.725	230.327	249.958	0	19.0512		0.0793444	0.0765858	-0.110254	0.0620856	0.102062	0.0328084
110.3	3.49004	216.784	214.005	208.898	208.497	74.5195	189.491	206.078	214.005	175.709	214.005	250.913	273.709	246.947	249.974	264.954	269.709	230.313	246.686	0	19.0501		0.080698	0.0766248	-0.110156	0.0617672	0.103332	0.0327773
110.4	3.49233	216.784	214.005	208.984	208.317	74.5195	190.302	206.078	214.005	175.709	214.005	254.258	273.983	246.915	249.959	265.461	269.692	230.299	242.307	0	19.0489		0.0821055	0.0763507	-0.110461	0.0610975	0.104621	0.0325099
110.5	3.49424	216.844	214.005	209.087	208.075	74.5195	191.043	206.078	214.005	175.709	214.005	257.603	274.378	246.878	249.944	265.832	269.676	230.285	236.686	0	19.0478		0.0835466	0.075655	-0.11131	0.059992	0.105892	0.0319497
110.6	3.49576	216.913	214.005	209.207	207.732	74.5195	191.702	206.078	214.005	175.709	214.005	260.875	274.934	246.83	248.892	266.158	269.642	230.271	229.746	0	19.0466		0.0846466	0.0741007	-0.112722	0.0580254	0.10683	0.0308597
110.7	3.49685	217.005	214.005	209.341	207.254	74.5195	192.273	206.078	214.005	175.709	214.005	264.007	275.686	246.77	247.701	266.142	269.606	230.257	221.472	0	19.0455		0.0857496	0.0720284	-0.11472	0.0555196	0.107617	0.0293812
110.8	3.49752	217.136	214.005	209.487	206.613	74.5195	192.751	206.078	213.892	175.709	214.005	266.935	276.656	246.695	246.099	266.126	269.562	230.244	211.91	0	19.0443		0.0867927	0.069389	-0.117258	0.0524065	0.10831	0.0275618
110.9	3.49773	217.319	214.005	209.644	205.79	74.5195	193.138	206.078	213.764	175.709	214.005	269.607	277.859	246.602	243.832	266.11	269.507	230.23	201.169	0	19.0432		0.087624	0.0660609	-0.120348	0.04855	0.108777	0.0253266
111	3.49749	217.564	214.005	209.808	204.773	74.5195	193.439	206.078	213.592	175.709	213.725	271.983	279.297	246.491	240.679	266.094	269.437	230.216	189.409	0	19.042		0.0881595	0.0620063	-0.123818	0.0440229	0.10906	0.0227236
111.1	3.49677	217.879	214.005	209.975	203.56	74.5195	193.664	206.078	213.348	175.709	213.408	274.037	280.961	246.362	236.461	266.078	269.349	230.202	176.842	0	19.0409		0.0883285	0.0572151	-0.127678	0.0386977	0.109006	0.0196834
111.2	3.49556	218.267	214.005	210.142	202.158	74.5195	193.825	206.078	213.007	175.015	212.979	275.755	282.833	246.215	231.045	266.062	269.24	230.189	163.715	0	19.0398		0.0883913	0.0520253	-0.131796	0.0326183	0.108881	0.0164181
111.3	3.49385	218.731	214.005	210.306	200.582	74.5195	193.939	206.078	212.551	174.227	212.372	277.143	284.884	246.051	224.359	266.046	269.11	230.393	150.302	0	19.0386		0.0880394	0.0462076	-0.135915	0.0259508	0.108518	0.0128758
111.4	3.49162	219.267	214.005	210.463	198.857	74.5195	194.023	206.078	211.964	173.164	211.525	278.219	287.078	245.873	216.387	266.031	268.957	230.628	136.891	0	19.0375		0.0873389	0.0399212	-0.139976	0.0187209	0.107951	0.00912171
111.5	3.48888	219.869	214.005	210.61	197.012	74.5195	194.097	205.232	211.24	171.655	210.39	279.018	289.37	245.684	207.175	265.674	268.783	230.948	123.768	0	19.0364		0.0863712	0.0337422	-0.143465	0.0110828	0.10753	0.00542694
111.6	3.48559	220.529	214.005	210.744	195.085	74.5195	194.097	204.271	210.375	169.553	208.933	279.587	291.713	245.488	196.826	265.271	268.59	231.409	111.209	0	19.0353		0.0852294	0.0275305	-0.146488	0.00325022	0.107183	0.00184098
111.7	3.48176	221.234	214.005	210.863	193.116	74.5195	194.097	202.974	209.376	166.736	207.132	279.983	294.055	245.287	185.496	264.733	268.38	232.056	99.4595	0	19.0342		0.0840154	0.0215996	-0.148796	-0.00460867	0.107098	-0.00147217
111.8	3.47737	221.971	214.005	210.966	191.147	74.5195	194.097	201.134	208.254	163.117	204.984	280.272	296.346	245.087	173.388	263.976	268.157	232.928	88.7303	0	19.033		0.0828363	0.0162616	-0.150168	-0.0122847	0.107457	-0.00433795
111.9	3.47242	222.723	214.005	211.052	189.221	74.5195	194.097	198.57	207.025	158.646	202.5	280.525	298.539	244.89	160.74	262.927	267.924	234.053	79.1829	0	19.0319		0.0817997	0.011814	-0.150422	-0.0195697	0.108427	-0.00659799
112	3.46689	223.476	214.005	211.122	187.376	74.5195	194.097	195.135	205.711	153.313	199.71	280.509	300.589	244.702	147.817	261.528	267.687	235.444	70.9243	0	19.0308		0.080888	0.00838124	-0.149591	-0.0264117	0.110052	-0.00820085
112.1	3.46078	224.212	214.005	211.177	185.651	74.5195	194.097	190.722	204.338	147.149	196.654	280.493	302.459	244.524	134.896	259.735	267.449	237.107	64.0008	0	19.0297		0.0802749	0.00628328	-0.147495	-0.0325476	0.11252	-0.0089891
112.2	3.45408	224.917	214.005	211.217	184.075	74.5195	194.097	185.269	202.935	140.221	193.388	280.476	304.121	244.361	122.253	257.523	267.217	239.031	58.3967	0	19.0286		0.0800169	0.00566341	-0.144153	-0.0378698	0.115897	-0.00891237
112.3	3.44679	225.577	214.005	211.246	182.673	74.5195	194.097	178.765	201.533	132.635	189.976	280.46	305.557	244.215	110.152	254.888	266.994	241.195	54.0344	0	19.0275		0.0801561	0.00660298	-0.139648	-0.0423109	0.120215	-0.00795877
112.4	3.43889	226.179	214.005	211.267	181.46	74.5195	194.097	171.247	200.16	124.527	186.49	280.444	306.757	244.086	98.8318	251.845	266.784	243.565	50.7783	0	19.0264		0.0807175	0.00911343	-0.134112	-0.0458493	0.125466	-0.00615696
112.5	3.43038	226.715	214.005	211.282	180.443	74.5195	194.097	162.798	198.846	116.057	183.003	280.428	307.725	243.976	88.4944	248.427	266.591	246.099	48.4413	0	19.0253		0.0817067	0.013131	-0.127732	-0.0485117	0.131604	-0.00357649
112.6	3.42126	227.179	214.005	211.296	179.619	74.5195	194.097	153.546	197.617	107.401	179.591	280.412	308.475	243.884	79.2957	244.687	266.418	248.747	46.7932	0	19.0242		0.0831086	0.0185151	-0.120732	-0.0503736	0.138538	-0.000326153
112.7	3.41153	227.568	214.005	211.296	178.979	74.5195	194.097	143.658	196.494	98.7444	176.325	279.244	309.03	243.809	71.3385	240.69	266.266	251.453	45.5718	0	19.0231		0.0844063	0.0244531	-0.113996	-0.0521441	0.145743	0.00312088
112.8	3.40117	227.882	214.005	211.296	178.5	74.5195	194.097	133.327	195.495	90.2738	173.27	277.922	309.423	243.75	64.6679	236.516	266.137	254.158	44.495	0	19.022		0.0859556	0.0311717	-0.107254	-0.0534805	0.153393	0.00687261
112.9	3.3902	228.127	214.005	211.296	178.157	74.5195	193.333	122.77	194.631	82.1657	170.479	276.143	309.695	243.704	59.2683	232.252	266.029	256.806	44.4925	0	19.0209		0.0875548	0.0388259	-0.100287	-0.0537452	0.161183	0.0112315
113	3.37859	228.31	214.005	211.296	177.915	74.5195	192.466	112.213	193.907	74.5801	167.996	273.627	309.892	243.667	55.0651	227.988	265.942	259.338	44.4899	0	19.0199		0.0889951	0.0464726	-0.0939557	-0.0540037	0.168794	0.0154868
113.1	3.36636	228.441	214.005	211.296	177.736	74.5195	191.295	101.882	193.32	67.6525	165.848	270.126	310.064	243.636	51.9279	223.815	265.873	261.707	44.4874	0	19.0188		0.0900709	0.053723	-0.0885061	-0.0543754	0.175907	0.0194956
113.2	3.3535	228.534	214.005	211.296	177.578	74.5195	189.634	91.9939	192.864	61.4877	164.047	265.442	310.046	243.608	49.6761	219.821	265.819	263.868	44.4849	0	19.0177		0.0904969	0.0600801	-0.0842659	-0.0550893	0.182142	0.0230628
113.3	3.34001	228.602	214.005	211.296	177.578	74.5195	187.32	82.7426	192.523	56.1548	162.589	259.428	310.029	243.594	48.088	216.084	265.777	265.79	44.4824	0	19.0166		0.090077	0.0651641	-0.081406	-0.0561827	0.187287	0.0260641
113.4	3.32589	228.662	214.005	211.296	177.578	74.5195	184.219	74.2938	192.279	51.684	161.455	252.003	310.011	243.58	46.9112	212.671	265.742	267.45	44.4799	0	19.0156		0.0887076	0.0687081	-0.0800071	-0.0577779	0.191101	0.0284274
113.5	3.31114	228.662	214.005	211.296	177.578	74.5195	180.235	66.7753	192.106	48.0652	160.608	243.15	308.698	243.567	45.8735	209.632	265.709	268.839	44.4774	0	19.0145		0.0857041	0.0696969	-0.0808536	-0.0606421	0.192941	0.0296959
113.6	3.29577	228.662	213.153	210.452	177.578	74.5195	175.313	60.2713	191.979	45.2483	160	232.92	307.21	243.553	45.871	207.002	265.694	269.961	44.4749	0	19.0134		0.0824283	0.0697526	-0.0829639	-0.0632562	0.194464	0.0310516
113.7	3.27978	228.662	212.187	209.494	177.578	74.5195	169.442	54.8187	191.866	43.1461	159.572	221.426	305.209	243.539	45.8684	204.796	265.679	270.831	44.4724	0	19.0124		0.0779551	0.0676775	-0.0868327	-0.0666117	0.194467	0.0316812
113.8	3.26317	228.662	210.884	208.202	177.578	74.5195	162.655	50.4052	191.866	41.6376	159.255	208.844	302.376	243.526	45.8658	203.008	265.664	271.476	44.4699	0	19.0113		0.0723122	0.0634706	-0.0924875	-0.0707328	0.193159	0.0316976
113.9	3.24595	228.662	209.034	206.368	177.578	74.5195	155.029	46.9698	191.866	40.5743	158.975	195.397	298.437	243.512	45.8633	201.614	265.65	271.934	44.4674	0	19.0102		0.0656818	0.0573601	-0.0997867	-0.0755216	0.190932	0.0313151
114	3.22813	228.662	206.456	203.813	177.578	74.5195	146.678	44.406	191.866	39.7865	158.975	181.351	293.164	243.499	45.8607	200.571	265.635	272.253	44.465	0	19.0092		0.0582213	0.0495809	-0.108736	-0.0810701	0.18799	0.0306286
114.1	3.20972	227.748	203.003	200.389	177.578	74.5195	137.752	42.5663	191.866	39.0922	158.975	166.999	286.395	243.485	45.8582	199.82	265.62	272.485	44.4625	0	19.0081		0.0506187	0.0404364	-0.118579	-0.0867403	0.184868	0.030239
114.2	3.19073	226.71	198.566	195.99	177.578	74.5195	128.427	41.2694	191.866	39.0922	158.975	152.649	278.038	243.472	45.8556	199.287	265.605	272.688	44.46	0	19.0071		0.042225	0.0297404	-0.129482	-0.09285	0.181505	0.0298129
114.3	3.17116	225.309	193.084	190.556	177.578	74.5195	118.897	40.3087	191.866	39.0922	158.975	138.607	268.073	243.458	45.8531	198.889	265.591	272.673	44.4576	0	19.006		0.0336802	0.0182408	-0.141221	-0.099342	0.178493	0.0297316
114.4	3.15103	223.321	186.545	184.074	177.578	74.5195	109.368	39.4618	191.866	39.0922	158.975	125.168	256.558	243.445	45.8506	198.538	265.576	272.658	44.4551	0	19.005		0.0252574	0.00624783	-0.153282	-0.105895	0.176191	0.0302701
114.5	3.13034	220.551	178.986	176.58	177.578	74.5195	100.043	39.4618	191.866	39.0922	158.975	112.596	243.62	242.488	45.8481	198.527	264.505	272.643	44.4527	0	19.0039		0.0161348	-0.00727121	-0.165751	-0.112306	0.174022	0.0307104
114.6	3.10912	216.84	170.492	168.16	177.578	74.5195	91.1164	39.4618	191.866	39.0922	158.975	101.115	229.457	241.404	45.8456	198.516	263.291	272.628	44.4503	0	19.0029		0.0074647	-0.0209952	-0.177918	-0.118362	0.172815	0.0319296
114.7	3.08737	212.072	161.192	158.939	177.578	74.5195	82.7655	39.4618	191.866	39.0922	158.975	90.8988	214.321	239.946	45.8431	198.505	261.658	272.613	44.4478	0	19.0019		-0.000820689	-0.0349306	-0.189495	-0.123852	0.17255	0.0338241
114.8	3.0651	206.182	151.25	149.084	177.578	74.5195	75.139	39.4618	191.866	39.0922	158.975	82.0615	198.51	237.883	45.8406	198.494	259.348	272.599	44.4454	0	19.0008		-0.00883186	-0.0490969	-0.200201	-0.128568	0.173167	0.0362545
114.9	3.04234	199.156	140.864	138.788	177.578	74.5195	68.3523	39.4618	191.866	39.0922	158.975	74.6529	182.355	235.014	45.8381	198.483	256.135	272.584	44.443	0	18.9998		-0.0167213	-0.063527	-0.20978	-0.132323	0.174554	0.0390481
115	3.01909	191.033	130.251	128.266	176.925	74.5195	62.4813	39.4618	191.866	39.0922	158.975	68.6559	166.202	231.174	45.8356	198.473	251.834	272.569	44.4406	0	18.9988		-0.024275	-0.077768	-0.217658	-0.134956	0.176558	0.0422761
115.1	2.99537	181.906	119.637	117.745	176.183	74.5195	57.5595	39.4618	191.866	39.0922	158.975	63.9878	150.397	226.245	45.8331	198.462	246.314	271.467	44.4382	0	18.9977		-0.0320557	-0.0922973	-0.224891	-0.137246	0.178425	0.0450649
115.2	2.97121	171.912	109.251	107.448	175.182	74.5195	53.5755	39.4618	191.132	39.0922	158.975	60.5034	135.269	220.159	45.8306	198.451	239.497	270.218	44.4358	0	18.9967		-0.0397291	-0.106473	-0.230118	-0.13795	0.180906	0.0479255
115.3	2.94661	161.229	99.3099	97.593	173.761	74.5195	50.4745	39.4618	190.299	39.0922	158.975	58.0025	121.117	212.903	45.8282	198.44	231.37	268.538	44.4334	0	18.9957		-0.0478573	-0.120731	-0.233823	-0.137717	0.183123	0.0503047
115.4	2.92161	150.069	90.0091	88.3726	171.782	74.5195	48.1602	39.4618	189.175	39.0922	158.975	56.2388	108.194	204.517	45.8257	198.43	221.978	266.162	44.431	0	18.9947		-0.0564963	-0.134886	-0.236145	-0.136767	0.184769	0.0520029
115.5	2.89621	138.664	81.5151	79.9521	169.13	74.5195	46.4995	39.4618	187.58	39.0922	158.975	54.9316	96.6941	195.096	45.8233	198.419	211.427	262.855	44.4286	0	18.9937		-0.0657169	-0.148788	-0.237325	-0.135393	0.185535	0.0528342
115.6	2.87044	127.259	73.9563	72.4587	165.723	74.5195	45.3289	39.4618	185.357	39.0922	158.975	53.7792	86.7465	184.783	45.8208	198.409	199.875	258.431	44.4263	0	18.9926		-0.0756064	-0.162328	-0.237701	-0.133948	0.185123	0.052634
115.7	2.84432	116.099	67.4176	65.9765	161.513	74.5195	44.4617	39.4618	182.379	39.0922	158.975	53.7763	78.4071	173.761	45.8184	198.398	187.53	252.75	44.4239	0	18.9916		-0.0850701	-0.173862	-0.236329	-0.13153	0.184049	0.0518833
115.8	2.81787	105.416	61.9358	60.5422	156.492	74.5195	43.6973	39.4618	178.553	39.0922	158.975	53.7735	71.6569	162.248	45.8159	198.387	174.635	245.737	44.4215	0	18.9906		-0.0948446	-0.184276	-0.2345	-0.129318	0.181631	0.050136
115.9	2.79112	95.4222	57.4987	56.1435	150.688	74.5195	43.6973	39.4618	173.826	39.0922	158.975	53.7706	66.4024	150.484	45.8135	198.377	161.459	237.375	44.4192	0	18.9896		-0.104683	-0.193201	-0.232411	-0.12811	0.177906	0.047024
116	2.76409	86.2949	54.045	52.7196	144.166	74.5195	43.6973	39.4618	168.187	39.0922	158.975	53.7678	62.4804	138.721	45.8111	198.366	148.285	227.711	44.4168	0	18.9886		-0.114308	-0.200324	-0.230294	-0.127581	0.172977	0.0430014
116.1	2.7368	78.1726	51.4674	50.1644	137.024	74.5195	43.6973	39.4618	161.669	39.0922	158.975	53.7649	59.6655	127.212	45.8087	198.356	135.394	216.854	44.4145	0	18.9876		-0.123427	-0.205411	-0.228411	-0.127982	0.167013	0.0381703
116.2	2.70927	71.1463	49.6178	48.3308	129.39	74.5195	43.6973	39.4618	154.345	39.0922	158.975	53.7621	57.6805	116.196	45.8063	198.346	123.056	204.968	44.4122	0	18.9866		-0.131741	-0.208322	-0.227044	-0.129546	0.160243	0.0326824
116.3	2.68153	65.2559	48.314	47.0382	121.415	74.5195	43.6973	39.4618	146.325	39.0922	158.432	53.7593	56.2094	105.891	45.8039	198.335	111.514	192.266	44.4098	0	18.9856		-0.138977	-0.209036	-0.226043	-0.131975	0.153504	0.027083
116.4	2.6536	60.4879	47.3482	46.0808	113.265	74.5195	43.6973	39.4618	137.752	39.0922	157.816	53.7565	54.9125	96.4799	45.8015	198.325	100.973	178.997	44.4075	0	18.9846		-0.144904	-0.207655	-0.226052	-0.135834	0.146667	0.0213364
116.5	2.62549	56.7767	46.4968	45.2367	105.115	74.5195	43.6973	39.4618	128.796	39.0922	156.985	53.7536	54.9096	88.1056	45.7991	198.314	91.5936	165.44	44.4052	0	18.9836		-0.147218	-0.201959	-0.225156	-0.139215	0.14143	0.0167805
116.6	2.59724	54.007	46.4968	45.2367	97.1396	74.5195	43.6973	39.4618	119.644	39.0922	155.805	53.7508	54.9068	80.8615	45.7967	198.304	83.4801	151.884	44.4029	0	18.9826		-0.1481	-0.194837	-0.225501	-0.144052	0.135533	0.0119309
116.7	2.56886	52.0195	46.4968	45.2367	89.5057	74.5195	43.6973	39.4618	110.492	39.0922	154.162	53.748	54.9039	74.7884	45.7943	197.613	76.6782	138.62	44.4006	0	18.9817		-0.146422	-0.18554	-0.226065	-0.14912	0.130474	0.00774562
116.8	2.54038	50.6184	46.4968	45.2367	82.3637	74.5195	43.6973	39.4618	101.536	39.0922	151.959	53.7453	54.9011	69.8724	45.7919	196.831	71.1723	125.924	44.3983	0	18.9807		-0.142097	-0.17437	-0.226492	-0.153938	0.126985	0.00489165
116.9	2.51182	49.5806	46.4968	45.2367	75.8413	74.5195	43.6973	39.4618	92.963	39.0922	149.13	53.7425	54.8982	66.0455	45.7896	195.779	66.8862	114.048	44.396	0	18.9797		-0.135227	-0.16178	-0.22637	-0.157989	0.125092	0.00345253
117	2.4832	48.6658	46.4968	45.2367	70.037	74.5195	43.6973	39.4618	84.9428	39.0922	145.635	53.7397	54.8954	63.1889	45.7872	194.291	63.687	103.202	44.3937	0	18.9787		-0.126121	-0.14836	-0.225251	-0.160742	0.12472	0.0034217
117.1	2.45454	48.6658	46.4968	45.2367	65.016	74.5195	43.6973	39.4618	77.6183	39.0922	141.465	53.7369	54.8926	61.1383	45.7848	192.222	61.3906	93.5513	44.3914	0	18.9777		-0.116737	-0.134801	-0.223849	-0.162851	0.125693	0.00386097
117.2	2.42587	48.6658	46.4968	45.2367	60.8066	74.5195	43.6973	39.4618	71.1003	39.0922	136.645	53.7342	54.8898	59.6921	45.7825	189.453	59.7711	85.2028	44.3891	0	18.9768		-0.106885	-0.121843	-0.221064	-0.163168	0.127737	0.00506608
117.3	2.39721	48.6658	46.4968	45.2367	57.3994	74.5195	43.6973	39.4618	65.4618	39.0922	131.229	53.7314	54.8869	58.6201	45.7801	185.898	58.5707	78.2039	44.3868	0	18.9758		-0.0976569	-0.110212	-0.216826	-0.161614	0.130485	0.00654738
117.4	2.36857	48.6658	46.4968	45.2367	54.7473	74.5195	43.6973	39.4618	60.7348	39.0922	125.299	53.7287	54.8841	57.6749	45.7778	181.51	57.5124	72.5385	44.3846	0	18.9748		-0.0901464	-0.100558	-0.211149	-0.15822	0.133497	0.00775533
117.5	2.33999	48.6658	46.4968	45.2367	52.7681	74.5195	43.6973	39.4618	56.9086	39.0922	118.959	53.7259	54.8813	57.6719	45.7755	176.277	57.5095	68.1284	44.3823	0	18.9738		-0.0811696	-0.0913319	-0.204141	-0.15313	0.137431	0.0100771
117.6	2.31147	48.6658	46.4968	45.2367	51.3478	74.5195	43.6973	39.4618	53.9304	39.0922	112.337	53.7232	54.8785	57.669	45.7731	170.23	57.5065	64.8366	44.38	0	18.9729		-0.0742551	-0.0842204	-0.195997	-0.146603	0.141075	0.0117434
117.7	2.28305	48.6658	46.4968	45.2367	50.3466	74.5195	43.6973	39.4618	51.7077	39.0922	105.569	53.7205	54.8758	57.6661	45.7708	163.437	57.5036	62.4737	44.3778	0	18.9719		-0.0691268	-0.0789432	-0.186985	-0.138997	0.144191	0.0126892
117.8	2.25473	48.6658	46.4968	45.2367	49.605	74.5195	43.6973	39.4618	50.1128	39.0922	98.8015	53.7178	54.873	57.6631	45.7685	156	57.5007	60.8074	44.3755	0	18.971		-0.065381	-0.0750867	-0.177419	-0.130742	0.146555	0.0128876
117.9	2.22656	48.6658	46.4968	45.2367	48.9512	74.5195	43.6973	39.4618	48.9885	39.0922	92.179	53.715	54.8702	57.6602	45.7662	148.053	57.4978	59.5723	44.3733	0	18.97		-0.0625159	-0.0721361	-0.167628	-0.122314	0.147973	0.0123519
118	2.19853	48.6658	46.4968	45.2367	48.9512	74.4254	43.6973	39.4618	48.1556	39.0922	85.8398	53.7123	54.8674	57.6573	45.7639	139.751	57.4949	58.4834	44.3711	0	18.969		-0.0610272	-0.0706022	-0.159073	-0.114065	0.148285	0.0105104
118.1	2.17069	48.6658	46.4968	45.2367	48.9512	74.3187	43.6973	39.4618	47.4215	39.0922	79.9092	53.7096	54.8647	57.6544	45.7616	131.268	57.492	58.4804	44.3688	0	18.9681		-0.0596748	-0.0692086	-0.148744	-0.104362	0.14888	0.00899433
118.2	2.14304	48.6658	46.4968	45.2367	48.9512	74.1747	43.6973	39.4618	47.4215	39.0922	74.493	53.707	54.8619	57.6515	45.7593	122.786	57.4891	58.4775	44.3666	0	18.9671		-0.0594634	-0.0689901	-0.140164	-0.0962374	0.14741	0.00623951
118.3	2.1156	48.6658	46.4968	45.2367	48.9512	73.9703	43.6973	39.4618	47.4215	39.0922	69.6732	53.7043	54.8592	57.6486	45.757	114.487	57.4863	58.4746	44.3644	0	18.9662		-0.0591528	-0.0686694	-0.132385	-0.0887702	0.145094	0.00305487
118.4	2.0884	48.6658	46.4968	45.2367	48.9512	73.6856	43.6973	39.4618	47.4215	39.0922	65.5037	53.7016	54.8565	57.6458	45.7547	106.543	57.4834	58.4716	44.3622	0	18.9652		-0.0587097	-0.0682122	-0.125544	-0.0820482	0.142022	-0.000430023
118.5	2.06145	48.6658	46.4968	45.2367	48.9512	73.3041	43.6973	39.4618	47.4215	39.0922	62.0083	53.6989	54.8537	57.6429	45.7524	99.112	57.4805	58.4687	44.36	0	18.9643		-0.0581067	-0.0675903	-0.119728	-0.0761188	0.138332	-0.00406436
118.6	2.03478	48.6658	46.4968	45.2367	48.9512	72.8139	43.6973	39.4618	47.4215	39.0922	59.179	53.6963	54.851	57.64	45.7502	92.3256	57.4777	58.4658	44.3578	0	18.9634		-0.0573238	-0.0667829	-0.114968	-0.0709837	0.134207	-0.00768394
118.7	2.0084	48.6658	46.4968	45.2367	48.9512	72.2083	43.6973	39.4618	47.4215	39.0922	56.9767	53.6936	54.8483	57.6372	45.7479	86.2866	57.4748	58.4629	44.3556	0	18.9624		-0.0563487	-0.0657776	-0.111232	-0.0665987	0.129863	-0.0111206
118.8	1.98233	48.6658	46.4968	45.2367	48.9512	71.486	43.6973	39.4618	47.4215	39.0922	55.3331	53.6909	54.8456	57.6343	45.7456	81.0624	57.472	58.4601	44.3534	0	18.9615		-0.055178	-0.0645706	-0.108429	-0.062875	0.125539	-0.0142124
118.9	1.9566	48.6658	46.4968	45.2367	48.9512	70.6509	43.6973	39.4618	47.4215	39.0922	54.1537	53.6883	54.8429	57.6315	45.7434	76.6826	57.4692	58.4572	44.3512	0	18.9606		-0.053817	-0.0631673	-0.106413	-0.0596844	0.121477	-0.0168141
119	1.93122	48.6658	46.4968	45.2367	48.9512	69.7126	43.6973	39.4618	47.4215	39.0922	53.3224	53.6857	54.8402	57.6287	45.7411	73.137	57.4663	58.4543	44.349	0	18.9596		-0.0522796	-0.0615822	-0.104994	-0.056866	0.117906	-0.0188057
119.1	1.90621	48.6658	46.4968	45.2367	48.9512	68.6851	43.6973	39.4618	47.4215	39.0922	52.7065	53.683	54.8375	57.6258	45.7389	70.3767	57.4635	58.4514	44.3468	0	18.9587		-0.0505879	-0.0598377	-0.103946	-0.0542352	0.11503	-0.0201003
119.2	1.88159	48.6658	46.4968	45.2367	48.9512	67.5869	43.6973	39.4618	47.4215	39.0922	52.1636	53.6804	54.8348	57.623	45.7367	68.316	57.4607	58.4486	44.3447	0	18.9578		-0.0487711	-0.057964	-0.103022	-0.051593	0.113008	-0.0206476
119.3	1.85739	48.6658	46.4968	45.2367	48.9512	66.4395	43.6973	39.4618	47.4215	39.0922	52.1636	53.6778	54.8321	57.6202	45.7344	66.8365	57.4579	58.4457	44.3425	0	18.9568		-0.0468643	-0.0559972	-0.103046	-0.049744	0.110827	-0.0210814
119.4	1.83362	48.6658	46.4968	45.2367	48.9512	65.267	43.6973	39.4618	47.4215	39.0922	52.1636	53.6752	54.8295	57.6174	45.7322	65.7927	57.4551	58.4429	44.3404	0	18.9559		-0.0449069	-0.053978	-0.103071	-0.0478464	0.109276	-0.0210144
119.5	1.81029	48.6658	46.4968	45.2367	48.9512	64.0946	43.6973	39.4618	47.4215	39.0922	52.1636	53.6726	54.8268	57.6146	45.73	65.0188	57.4523	58.44	44.3382	0	18.955		-0.0429413	-0.0519498	-0.103095	-0.0459408	0.108118	-0.0206512
119.6	1.78744	48.6658	46.4968	45.2367	48.9512	62.9472	43.6973	39.4618	47.4215	39.0922	52.1636	53.67	54.8242	57.6118	45.7278	64.3362	57.4495	58.4372	44.3361	0	18.9541		-0.0410103	-0.049957	-0.103119	-0.0440691	0.107091	-0.0202126
119.7	1.76508	48.6658	46.4968	45.2367	48.9512	61.849	43.6973	39.4618	47.4215	39.0922	52.1636	53.6674	54.8215	57.609	45.7256	64.3331	57.4468	58.4344	44.3339	0	18.9532		-0.0391553	-0.0480424	-0.103142	-0.0422713	0.107067	-0.0190777
119.8	1.74323	48.6658	46.4968	45.2367	48.9512	60.8215	43.6973	39.4618	47.4215	39.0922	52.1636	53.6648	54.8189	57.6063	45.7234	64.33	57.444	58.4316	44.3318	0	18.9522		-0.0374148	-0.0462455	-0.103166	-0.0405846	0.107044	-0.0180149
119.9	1.72192	48.6658	46.4968	45.2367	48.9512	59.8831	43.6973	39.4618	47.4215	39.0922	52.1636	53.6622	54.8162	57.6035	45.7212	64.3269	57.4412	58.4288	44.3296	0	18.9513		-0.0358215	-0.0446004	-0.10319	-0.0390409	0.10702	-0.0170443
120	1.70115	48.6658	46.4968	45.2367	48.9512	59.0481	43.6973	39.4618	47.4215	39.0922	52.1636	53.6596	54.8136	57.6007	45.719	64.3239	57.4385	58.426	44.3275	0	18.9504		-0.0344017	-0.0431341	-0.103214	-0.0376654	0.106996	-0.0161814
120.1	1.68095	48.6658	46.4968	45.2367	48.9512	58.3258	43.6973	39.4618	47.4215	39.0922	52.1636	53.6571	54.811	57.598	45.7168	64.3208	57.4357	58.4232	44.3254	0	18.9495		-0.0331732	-0.0418651	-0.103237	-0.0364754	0.106972	-0.0154368
120.2	1.66134	48.6658	46.4968	45.2367	48.9512	57.7202	43.6973	39.4618	47.4215	39.0922	52.1636	53.6545	54.8084	57.5952	45.7146	64.3177	57.433	58.4204	44.3233	0	18.9486		-0.0321446	-0.0408023	-0.103261	-0.0354792	0.106949	-0.0148155
120.3	1.64232	48.6658	46.4968	45.2367	48.9512	57.23	43.6973	39.4618	47.4215	39.0922	52.1636	53.652	54.8058	57.5925	45.7124	64.3146	57.4303	58.4176	44.3212	0	18.9477		-0.0313148	-0.0399448	-0.103285	-0.0346758	0.106925	-0.0143165
120.4	1.62392	48.6658	46.4968	45.2367	48.9512	56.8485	43.6973	39.4618	47.4215	39.0922	52.1636	53.6494	54.8032	57.5898	45.7103	64.3116	57.4275	58.4148	44.3191	0	18.9468		-0.0306731	-0.0392814	-0.103308	-0.0340547	0.106902	-0.0139329
120.5	1.60615	48.6658	46.4968	45.2367	48.9512	56.5637	43.6973	39.4618	47.4215	39.0922	52.1636	53.6469	54.8006	57.587	45.7081	64.3085	57.4248	58.4121	44.317	0	18.9459		-0.0301995	-0.0387916	-0.103332	-0.0335965	0.106878	-0.0136523
120.6	1.58902	48.6658	46.4968	45.2367	48.9512	56.3594	43.6973	39.4618	47.4215	39.0922	52.1636	53.6443	54.798	57.5843	45.7059	64.3055	57.4221	58.4093	44.3149	0	18.945		-0.029866	-0.0384464	-0.103355	-0.0332741	0.106855	-0.0134575
120.7	1.57254	48.6658	46.4968	45.2367	48.9512	56.2154	43.6973	39.4618	47.4215	39.0922	52.1636	53.6418	54.7954	57.5816	45.7038	64.3025	57.4194	58.4065	44.3128	0	18.9441		-0.0296377	-0.0382098	-0.103378	-0.0330535	0.106832	-0.0133271
120.8	1.55673	48.6658	46.4968	45.2367	48.9512	56.1087	43.6973	39.4618	47.4215	39.0922	52.1636	53.6393	54.7928	57.5789	45.7016	64.2994	57.4167	58.4038	44.3107	0	18.9432		-0.0294745	-0.0380405	-0.103401	-0.0328961	0.106809	-0.0132365
120.9	1.54158	48.6658	46.4968	45.2367	48.9512	56.0146	43.6973	39.4618	47.4215	39.0922	52.1636	53.6368	54.7902	57.5762	45.6995	64.2964	57.414	58.4011	44.3086	0	18.9424		-0.0293333	-0.0378939	-0.103425	-0.0327601	0.106785	-0.0131593
121	1.52712	48.6658	46.4968	45.2367	48.9512	56.0146	43.6973	39.4618	47.4215	39.0922	52.1636	53.6343	54.7877	57.5735	45.6973	64.2934	57.4113	58.3983	44.3066	0	18.9415		-0.0293567	-0.0379173	-0.103448	-0.0327834	0.106762	-0.0131827
121.1	1.51334	48.6658	46.4968	45.2367	48.9512	56.0146	43.6973	39.4618	47.4215	39.0922	52.1636	53.6317	54.7851	57.5708	45.6952	64.2904	57.4086	58.3956	44.3045	0	18.9406		-0.02938	-0.0379406	-0.103471	-0.0328067	0.106739	-0.013206
121.2	1.50025	48.6658	46.4968	45.2367	48.9512	56.0146	43.6973	39.4618	47.4215	39.0922	52.1636	53.6293	54.7826	57.5681	45.6931	64.2874	57.406	58.3929	44.3024	0	18.9397		-0.0294033	-0.0379638	-0.103494	-0.03283	0.106716	-0.0132293
121.3	1.48785	48.6658	46.4968	45.2367	48.9512	56.0146	43.6973	39.4618	47.4215	39.0922	52.1636	53.6268	54.78	57.5654	45.691	64.2844	57.4033	58.3902	44.3004	0	18.9388		-0.0294265	-0.037987	-0.103517	-0.0328532	0.106693	-0.0132525
121.4	1.47616	48.6658	46.4968	45.2367	48.9512	56.0146	43.6973	39.4618	47.4215	39.0922	52.1636	53.6243	54.7775	57.5628	45.6888	64.2815	57.4006	58.3875	44.2983	0	18.9379		-0.0294496	-0.0380102	-0.10354	-0.0328764	0.10667	-0.0132757
121.5	1.46516	48.6658	46.4968	45.2367	48.9512	56.0146	43.6973	39.4618	47.4215	39.0922	52.1636	53.6218	54.775	57.5601	45.6867	64.2785	57.398	58.3848	44.2963	0	18.9371		-0.0294727	-0.0380332	-0.103563	-0.0328994	0.106647	-0.0132988
121.6	1.45486	48.6658	46.4968	45.2367	48.9512	56.0146	43.6973	39.4618	47.4215	39.0922	52.1636	53.6193	54.7724	57.5575	45.6846	64.2755	57.3953	58.3821	44.2942	0	18.9362		-0.0294958	-0.0380563	-0.103586	-0.0329225	0.106625	-0.0133218
121.7	1.44527	48.6658	46.4968	45.2367	48.9512	56.0146	43.6973	39.4618	47.4215	39.0922	52.1636	53.6169	54.7699	57.5548	45.6825	64.2726	57.3927	58.3794	44.2922	0	18.9353		-0.0295188	-0.0380792	-0.103608	-0.0329454	0.106602	-0.0133448
121.8	1.43637	48.6658	46.4968	45.2367	48.9512	56.0146	43.6973	39.4618	47.4215	39.0922	52.1636	53.6144	54.7674	57.5522	45.6804	64.2696	57.3901	58.3767	44.2902	0	18.9345		-0.0295417	-0.0381021	-0.103631	-0.0329684	0.106579	-0.0133678
121.9	1.42818	48.6658	46.4968	45.2367	48.9512	56.0146	43.6973	39.4618	47.4215	39.0922	52.1636	53.6119	54.7649	57.5495	45.6783	64.2667	57.3874	58.374	44.2881	0	18.9336		-0.0295645	-0.038125	-0.103654	-0.0329912	0.106557	-0.0133906
122	1.42069	48.6658	46.4968	45.2367	48.9512	56.0146	43.6973	39.4618	47.4215	39.0922	52.1636	53.6095	54.7624	57.5469	45.6763	64.2637	57.3848	58.3714	44.2861	0	18.9327		-0.0295874	-0.0381478	-0.103676	-0.033014	0.106534	-0.0134135
122.1	1.4139	48.6658	46.4968	45.2367	48.9512	56.0146	43.6973	39.4618	47.4215	39.0922	52.1636	53.6071	54.7599	57.5443	45.6742	64.2608	57.3822	58.3687	44.2841	0	18.9319		-0.0296101	-0.0381705	-0.103699	-0.0330368	0.106512	-0.0134362
122.2	1.40781	48.6658	46.4968	45.2367	48.9512	56.0146	43.6973	39.4618	47.4215	39.0922	52.1636	53.6046	54.7574	57.5417	45.6721	64.2579	57.3796	58.3661	44.2821	0	18.931		-0.0296328	-0.0381932	-0.103721	-0.0330595	0.106489	-0.013459
122.3	1.40241	48.6658	46.4968	45.2367	48.9512	56.0146	43.6973	39.4618	47.4215	39.0922	52.1636	53.6022	54.7549	57.5391	45.67	64.255	57.377	58.3634	44.2801	0	18.9301		-0.0296554	-0.0382158	-0.103744	-0.0330821	0.106467	-0.0134816
122.4	1.39772	48.6658	46.4968	45.2367	48.9512	56.0146	43.6973	39.4618	47.4215	39.0922	52.1636	53.5998	54.7524	57.5365	45.668	64.2521	57.3744	58.3608	44.2781	0	18.9293		-0.029678	-0.0382384	-0.103766	-0.0331047	0.106444	-0.0135042
122.5	1.39372	48.6658	46.4968	45.2367	48.9512	56.0146	43.6973	39.4618	47.4215	39.0922	52.1636	53.5973	54.75	57.5339	45.6659	64.2492	57.3718	58.3581	44.2761	0	18.9284		-0.0297006	-0.0382609	-0.103788	-0.0331272	0.106422	-0.0135268
122.6	1.39041	48.6658	46.4968	45.2367	48.9512	56.0146	43.6973	39.4618	47.4215	39.0922	52.1636	53.5949	54.7475	57.5313	45.6638	64.2463	57.3692	58.3555	44.2741	0	18.9276		-0.029723	-0.0382834	-0.103811	-0.0331497	0.1064	-0.0135493
122.7	1.38779	48.6658	46.4968	45.2367	48.9512	56.0146	43.6973	39.4618	47.4215	39.0922	52.1636	53.5925	54.7451	57.5287	45.6618	64.2434	57.3667	58.3529	44.2721	0	18.9267		-0.0297455	-0.0383058	-0.103833	-0.0331721	0.106378	-0.0135717
122.8	1.38586	48.6658	46.4968	45.2367	48.9512	56.0146	43.6973	39.4618	47.4215	39.0922	52.1636	53.5901	54.7426	57.5261	45.6598	64.2405	57.3641	58.3503	44.2701	0	18.9259		-0.0297678	-0.0383282	-0.103855	-0.0331945	0.106355	-0.0135941
122.9	1.38461	48.6658	46.4968	45.2367	48.9512	56.0146	43.6973	39.4618	47.4215	39.0922	52.1636	53.5877	54.7402	57.5236	45.6577	64.2377	57.3615	58.3477	44.2681	0	18.925		-0.0297901	-0.0383505	-0.103877	-0.0332168	0.106333	-0.0136164
123	1.38403	48.6658	46.4968	45.2367	48.9512	56.0146	43.6973	39.4618	47.4215	39.0922	52.1636	53.5854	54.7377	57.521	45.6557	64.2348	57.359	58.3451	44.2662	0	18.9242		-0.0298124	-0.0383727	-0.103899	-0.033239	0.106311	-0.0136387
123.1	1.38413	48.6658	46.4968	45.2367	48.9512	56.0146	43.6973	39.4618	47.4215	39.0922	52.1636	53.583	54.7353	57.5184	45.6537	64.232	57.3564	58.3425	44.2642	0	18.9234		-0.0298346	-0.0383949	-0.103921	-0.0332612	0.106289	-0.0136609
123.2	1.3849	48.6658	46.4968	45.2367	48.9512	56.0146	43.6973	39.4618	47.4215	39.0922	52.1636	53.5806	54.7329	57.5159	45.6516	64.2291	57.3539	58.3399	44.2622	0	18.9225		-0.0298567	-0.038417	-0.103943	-0.0332834	0.106267	-0.0136831
123.3	1.38632	48.6658	46.4968	45.2367	48.9512	56.0146	43.6973	39.4618	47.4215	39.0922	52.1636	53.5782	54.7304	57.5133	45.6496	64.2263	57.3513	58.3373	44.2603	0	18.9217		-0.0298788	-0.0384391	-0.103965	-0.0333054	0.106246	-0.0137052
123.4	1.3884	48.6658	46.4968	45.2367	48.9512	56.0146	43.6973	39.4618	47.4215	39.0922	52.1636	53.5759	54.728	57.5108	45.6476	64.2234	57.3488	58.3347	44.2583	0	18.9208		-0.0299009	-0.0384611	-0.103987	-0.0333275	0.106224	-0.0137272
123.5	1.39113	48.6658	46.4968	45.2367	48.9512	56.0146	43.6973	39.4618	47.4215	39.0922	52.1636	53.5735	54.7256	57.5083	45.6456	64.2206	57.3463	58.3322	44.2564	0	18.92		-0.0299229	-0.0384831	-0.104008	-0.0333495	0.106202	-0.0137492
123.6	1.3945	48.6658	46.4968	45.2367	48.9512	56.0146	43.6973	39.4618	47.4215	39.0922	52.1636	53.5712	54.7232	57.5058	45.6436	64.2178	57.3438	58.3296	44.2544	0	18.9192		-0.0299448	-0.038505	-0.10403	-0.0333714	0.10618	-0.0137712
123.7	1.39851	48.6658	46.4968	45.2367	48.9512	56.0146	43.6973	39.4618	47.4215	39.0922	52.1636	53.5688	54.7208	57.5032	45.6416	64.215	57.3413	58.3271	44.2525	0	18.9184		-0.0299667	-0.0385269	-0.104052	-0.0333933	0.106159	-0.0137931
123.8	1.40314	48.6658	46.4968	45.2367	48.9512	56.0146	43.6973	39.4618	47.4215	39.0922	52.1636	53.5665	54.7184	57.5007	45.6396	64.2122	57.3388	58.3245	44.2506	0	18.9175		-0.0299885	-0.0385487	-0.104073	-0.0334151	0.106137	-0.0138149
123.9	1.4084	48.6658	46.4968	45.2367	48.9512	56.0146	43.6973	39.4618	47.4215	39.0922	52.1636	53.5641	54.716	57.4982	45.6376	64.2094	57.3363	58.322	44.2486	0	18.9167		-0.0300103	-0.0385704	-0.104095	-0.0334368	0.106116	-0.0138367
124	1.41427	48.6658	46.4968	45.2367	48.9512	56.0146	43.6973	39.4618	47.4215	39.0922	52.1636	53.5618	54.7137	57.4957	45.6356	64.2066	57.3338	58.3194	44.2467	0	18.9159		-0.030032	-0.0385921	-0.104116	-0.0334586	0.106094	-0.0138584
124.1	1.42075	48.6658	46.4968	45.2367	48.9512	56.0146	43.6973	39.4618	47.4215	39.0922	52.1636	53.5595	54.7113	57.4932	45.6336	64.2038	57.3313	58.3169	44.2448	0	18.9151		-0.0300536	-0.0386138	-0.104138	-0.0334802	0.106073	-0.0138801
124.2	1.42783	48.6658	46.4968	45.2367	48.9512	56.0146	43.6973	39.4618	47.4215	39.0922	52.1636	53.5572	54.7089	57.4907	45.6317	64.201	57.3288	58.3144	44.2429	0	18.9142		-0.0300752	-0.0386354	-0.104159	-0.0335018	0.106051	-0.0139017
124.3	1.43551	48.6658	46.4968	45.2367	48.9512	56.0146	43.6973	39.4618	47.4215	39.0922	52.1636	53.5549	54.7066	57.4883	45.6297	64.1982	57.3263	58.3119	44.241	0	18.9134		-0.0300968	-0.0386569	-0.104181	-0.0335234	0.10603	-0.0139233
124.4	1.44377	48.6658	46.4968	45.2367	48.9512	56.0146	43.6973	39.4618	47.4215	39.0922	52.1636	53.5525	54.7042	57.4858	45.6277	64.1955	57.3239	58.3094	44.2391	0	18.9126		-0.0301183	-0.0386784	-0.104202	-0.0335449	0.106009	-0.0139448
124.5	1.45261	48.6658	46.4968	45.2367	48.9512	56.0146	43.6973	39.4618	47.4215	39.0922	52.1636	53.5502	54.7019	57.4833	45.6258	64.1927	57.3214	58.3069	44.2372	0	18.9118		-0.0301398	-0.0386999	-0.104223	-0.0335663	0.105987	-0.0139663
124.6	1.46203	48.6658	46.4968	45.2367	48.9512	56.0146	43.6973	39.4618	47.4215	39.0922	52.1636	53.548	54.6995	57.4809	45.6238	64.19	57.3189	58.3044	44.2353	0	18.911		-0.0301612	-0.0387213	-0.104244	-0.0335877	0.105966	-0.0139877
124.7	1.47202	48.6658	46.4968	45.2367	48.9512	56.0146	43.6973	39.4618	47.4215	39.0922	52.1636	53.5457	54.6972	57.4784	45.6219	64.1872	57.3165	58.3019	44.2334	0	18.9102		-0.0301825	-0.0387426	-0.104265	-0.033609	0.105945	-0.014009
124.8	1.48258	48.6658	46.4968	45.2367	48.9512	56.0146	43.6973	39.4618	47.4215	39.0922	52.1636	53.5434	54.6949	57.4759	45.6199	64.1845	57.314	58.2994	44.2315	0	18.9094		-0.0302038	-0.0387639	-0.104287	-0.0336303	0.105924	-0.0140304
124.9	1.49369	48.6658	46.4968	45.2367	48.9512	56.0146	43.6973	39.4618	47.4215	39.0922	52.1636	53.5411	54.6925	57.4735	45.618	64.1818	57.3116	58.2969	44.2296	0	18.9086		-0.030225	-0.0387851	-0.104308	-0.0336516	0.105903	-0.0140516
125	1.50535	48.6658	46.4968	45.2367	48.9512	56.0146	43.6973	39.4618	47.4215	39.0922	52.1636	53.5388	54.6902	57.4711	45.616	64.179	57.3092	58.2944	44.2277	0	18.9078		-0.0302462	-0.0388063	-0.104329	-0.0336728	0.105882	-0.0140728
125.1	1.51756	48.6658	46.4968	45.2367	48.9512	56.0146	43.6973	39.4618	47.4215	39.0922	52.1636	53.5366	54.6879	57.4686	45.6141	64.1763	57.3068	58.292	44.2259	0	18.907		-0.0302674	-0.0388274	-0.104349	-0.0336939	0.105861	-0.014094
125.2	1.5303	48.6658	46.4968	45.2367	48.9512	56.0146	43.6973	39.4618	47.4215	39.0922	52.1636	53.5343	54.6856	57.4662	45.6122	64.1736	57.3043	58.2895	44.224	0	18.9062		-0.0302884	-0.0388485	-0.10437	-0.033715	0.10584	-0.0141151
125.3	1.54358	48.6658	46.4968	45.2367	48.9512	56.0146	43.6973	39.4618	47.4215	39.0922	52.1636	53.5321	54.6833	57.4638	45.6103	64.1709	57.3019	58.2871	44.2221	0	18.9054		-0.0303095	-0.0388695	-0.104391	-0.033736	0.105819	-0.0141361
125.4	1.55738	48.6658	46.4968	45.2367	48.9512	56.0146	43.6973	39.4618	47.4215	39.0922	52.1636	53.5298	54.681	57.4614	45.6084	64.1682	57.2995	58.2846	44.2203	0	18.9046		-0.0303305	-0.0388905	-0.104412	-0.033757	0.105799	-0.0141571
125.5	1.57171	48.6658	46.4968	45.2367	48.9512	56.0146	43.6973	39.4618	47.4215	39.0922	52.1636	53.5276	54.6787	57.459	45.6064	64.1655	57.2971	58.2822	44.2184	0	18.9038		-0.0303514	-0.0389114	-0.104433	-0.0337779	0.105778	-0.0141781
125.6	1.58654	48.6658	46.4968	45.2367	48.9512	56.0146	43.6973	39.4618	47.4215	39.0922	52.1636	53.5253	54.6764	57.4566	45.6045	64.1629	57.2947	58.2797	44.2166	0	18.903		-0.0303723	-0.0389322	-0.104453	-0.0337988	0.105757	-0.0141989
125.7	1.60187	48.6658	46.4968	45.2367	48.9512	56.0146	43.6973	39.4618	47.4215	39.0922	52.1636	53.5231	54.6741	57.4542	45.6026	64.1602	57.2923	58.2773	44.2147	0	18.9022		-0.0303931	-0.0389531	-0.104474	-0.0338196	0.105737	-0.0142198
125.8	1.6177	48.6658	46.4968	45.2367	48.9512	56.0146	43.6973	39.4618	47.4215	39.0922	52.1636	53.5209	54.6719	57.4518	45.6007	64.1575	57.2899	58.2749	44.2129	0	18.9014		-0.0304139	-0.0389738	-0.104495	-0.0338404	0.105716	-0.0142406
125.9	1.63401	48.6658	46.4968	45.2367	48.9512	56.0146	43.6973	39.4618	47.4215	39.0922	52.1636	53.5186	54.6696	57.4494	45.5988	64.1548	57.2876	58.2725	44.2111	0	18.9006		-0.0304346	-0.0389945	-0.104515	-0.0338611	0.105696	-0.0142613
126	1.6508	48.6658	46.4968	45.2367	48.9512	56.0146	43.6973	39.4618	47.4215	39.0922	52.1636	53.5164	54.6673	57.447	45.597	64.1522	57.2852	58.27	44.2092	0	18.8999		-0.0304553	-0.0390152	-0.104535	-0.0338818	0.105675	-0.014282
126.1	1.66805	48.6658	46.4968	45.2367	48.9512	56.0146	43.6973	39.4618	47.4215	39.0922	52.1636	53.5142	54.6651	57.4446	45.5951	64.1495	57.2828	58.2676	44.2074	0	18.8991		-0.0304759	-0.0390358	-0.104556	-0.0339024	0.105655	-0.0143026
126.2	1.68575	48.6658	46.4968	45.2367	48.9512	56.0146	43.6973	39.4618	47.4215	39.0922	52.1636	53.512	54.6628	57.4423	45.5932	64.1469	57.2805	58.2652	44.2056	0	18.8983		-0.0304965	-0.0390564	-0.104576	-0.0339229	0.105634	-0.0143232
126.3	1.70389	48.6658	46.4968	45.2367	48.9512	56.0146	43.6973	39.4618	47.4215	39.0922	52.1636	53.5098	54.6606	57.4399	45.5913	64.1443	57.2781	58.2628	44.2038	0	18.8975		-0.030517	-0.0390769	-0.104597	-0.0339435	0.105614	-0.0143438
126.4	1.72246	48.6658	46.4968	45.2367	48.9512	56.0146	43.6973	39.4618	47.4215	39.0922	52.1636	53.5076	54.6583	57.4376	45.5895	64.1416	57.2758	58.2605	44.202	0	18.8967		-0.0305375	-0.0390973	-0.104617	-0.0339639	0.105594	-0.0143643
126.5	1.74143	48.6658	46.4968	45.2367	48.9512	56.0146	43.6973	39.4618	47.4215	39.0922	52.1636	53.5054	54.6561	57.4352	45.5876	64.139	57.2734	58.2581	44.2001	0	18.896		-0.0305579	-0.0391177	-0.104637	-0.0339843	0.105574	-0.0143847
126.6	1.76081	48.6658	46.4968	45.2367	48.9512	56.0146	43.6973	39.4618	47.4215	39.0922	52.1636	53.5033	54.6539	57.4329	45.5857	64.1364	57.2711	58.2557	44.1983	0	18.8952		-0.0305783	-0.0391381	-0.104657	-0.0340047	0.105553	-0.0144051
126.7	1.78057	48.6658	46.4968	45.2367	48.9512	56.0146	43.6973	39.4618	47.4215	39.0922	52.1636	53.5011	54.6516	57.4305	45.5839	64.1338	57.2688	58.2533	44.1965	0	18.8944		-0.0305986	-0.0391584	-0.104677	-0.034025	0.105533	-0.0144254
126.8	1.8007	48.6658	46.4968	45.2367	48.9512	56.0146	43.6973	39.4618	47.4215	39.0922	52.1636	53.4989	54.6494	57.4282	45.582	64.1312	57.2664	58.251	44.1948	0	18.8937		-0.0306188	-0.0391787	-0.104697	-0.0340453	0.105513	-0.0144457
126.9	1.82118	48.6658	46.4968	45.2367	48.9512	56.0146	43.6973	39.4618	47.4215	39.0922	52.1636	53.4967	54.6472	57.4259	45.5802	64.1286	57.2641	58.2486	44.193	0	18.8929		-0.0306391	-0.0391989	-0.104717	-0.0340655	0.105493	-0.0144659
127	1.842	48.6658	46.4968	45.2367	48.9512	56.0146	43.6973	39.4618	47.4215	39.0922	52.1636	53.4946	54.645	57.4236	45.5783	64.126	57.2618	58.2463	44.1912	0	18.8921		-0.0306592	-0.039219	-0.104737	-0.0340857	0.105473	-0.0144861
127.1	1.86315	48.6658	46.4968	45.2367	48.9512	56.0146	43.6973	39.4618	47.4215	39.0922	52.1636	53.4924	54.6428	57.4213	45.5765	64.1234	57.2595	58.2439	44.1894	0	18.8914		-0.0306794	-0.0392392	-0.104757	-0.0341058	0.105453	-0.0145063
127.2	1.8846	48.6658	46.4968	45.2367	48.9512	56.0146	43.6973	39.4618	47.4215	39.0922	52.1636	53.4903	54.6406	57.4189	45.5747	64.1208	57.2572	58.2416	44.1876	0	18.8906		-0.0306994	-0.0392592	-0.104777	-0.0341259	0.105433	-0.0145263
127.3	1.90635	48.6658	46.4968	45.2367	48.9512	56.0146	43.6973	39.4618	47.4215	39.0922	52.1636	53.4881	54.6384	57.4166	45.5729	64.1183	57.2549	58.2392	44.1859	0	18.8899		-0.0307195	-0.0392792	-0.104797	-0.0341459	0.105414	-0.0145464
127.4	1.92837	48.6658	46.4968	45.2367	48.9512	56.0146	43.6973	39.4618	47.4215	39.0922	52.1636	53.486	54.6362	57.4144	45.571	64.1157	57.2526	58.2369	44.1841	0	18.8891		-0.0307394	-0.0392992	-0.104817	-0.0341659	0.105394	-0.0145664
127.5	1.95064	48.6658	46.4968	45.2367	48.9512	56.0146	43.6973	39.4618	47.4215	39.0922	52.1636	53.4839	54.6341	57.4121	45.5692	64.1132	57.2503	58.2346	44.1823	0	18.8884		-0.0307594	-0.0393191	-0.104837	-0.0341858	0.105374	-0.0145863
127.6	1.97316	48.6658	46.4968	45.2367	48.9512	56.0146	43.6973	39.4618	47.4215	39.0922	52.1636	53.4817	54.6319	57.4098	45.5674	64.1106	57.2481	58.2323	44.1806	0	18.8876		-0.0307792	-0.039339	-0.104856	-0.0342056	0.105354	-0.0146062
127.7	1.9959	48.6658	46.4968	45.2367	48.9512	56.0146	43.6973	39.4618	47.4215	39.0922	52.1636	53.4796	54.6297	57.4075	45.5656	64.1081	57.2458	58.23	44.1788	0	18.8869		-0.0307991	-0.0393588	-0.104876	-0.0342255	0.105335	-0.014626
127.8	2.01885	48.6658	46.4968	45.2367	48.9512	56.0146	43.6973	39.4618	47.4215	39.0922	52.1636	53.4775	54.6276	57.4052	45.5638	64.1055	57.2435	58.2276	44.1771	0	18.8861		-0.0308188	-0.0393785	-0.104895	-0.0342452	0.105315	-0.0146458
127.9	2.04198	48.6658	46.4968	45.2367	48.9512	56.0146	43.6973	39.4618	47.4215	39.0922	52.1636	53.4754	54.6254	57.403	45.562	64.103	57.2413	58.2253	44.1753	0	18.8854		-0.0308386	-0.0393983	-0.104915	-0.034265	0.105296	-0.0146656
128	2.06529	48.6658	46.4968	45.2367	48.9512	56.0146	43.6973	39.4618	47.4215	39.0922	52.1636	53.4733	54.6232	57.4007	45.5602	64.1005	57.239	58.2231	44.1736	0	18.8846		-0.0308583	-0.0394179	-0.104934	-0.0342846	0.105276	-0.0146853
128.1	2.08874	48.6658	46.4968	45.2367	48.9512	56.0146	43.6973	39.4618	47.4215	39.0922	52.1636	53.4712	54.6211	57.3984	45.5584	64.0979	57.2368	58.2208	44.1718	0	18.8839		-0.0308779	-0.0394376	-0.104954	-0.0343043	0.105257	-0.0147049
128.2	2.11234	48.6658	46.4968	45.2367	48.9512	56.0146	43.6973	39.4618	47.4215	39.0922	52.1636	53.4691	54.619	57.3962	45.5566	64.0954	57.2345	58.2185	44.1701	0	18.8831		-0.0308975	-0.0394571	-0.104973	-0.0343239	0.105237	-0.0147245
128.3	2.13604	48.6658	46.4968	45.2367	48.9512	56.0146	43.6973	39.4618	47.4215	39.0922	52.1636	53.467	54.6168	57.3939	45.5548	64.0929	57.2323	58.2162	44.1684	0	18.8824		-0.030917	-0.0394766	-0.104993	-0.0343434	0.105218	-0.0147441
128.4	2.15985	48.6658	46.4968	45.2367	48.9512	56.0146	43.6973	39.4618	47.4215	39.0922	52.1636	53.4649	54.6147	57.3917	45.5531	64.0904	57.23	58.2139	44.1667	0	18.8817		-0.0309365	-0.0394961	-0.105012	-0.0343629	0.105199	-0.0147636
128.5	2.18375	48.6658	46.4968	45.2367	48.9512	56.0146	43.6973	39.4618	47.4215	39.0922	52.1636	53.4628	54.6126	57.3895	45.5513	64.0879	57.2278	58.2117	44.1649	0	18.8809		-0.0309559	-0.0395156	-0.105031	-0.0343823	0.10518	-0.014783
128.6	2.20771	48.6658	46.4968	45.2367	48.9512	56.0146	43.6973	39.4618	47.4215	39.0922	52.1636	53.4607	54.6104	57.3872	45.5495	64.0854	57.2256	58.2094	44.1632	0	18.8802		-0.0309753	-0.0395349	-0.10505	-0.0344017	0.10516	-0.0148024
128.7	2.23172	48.6658	46.4968	45.2367	48.9512	56.0146	43.6973	39.4618	47.4215	39.0922	52.1636	53.4587	54.6083	57.385	45.5478	64.083	57.2234	58.2072	44.1615	0	18.8795		-0.0309947	-0.0395543	-0.105069	-0.034421	0.105141	-0.0148218
128.8	2.25577	48.6658	46.4968	45.2367	48.9512	56.0146	43.6973	39.4618	47.4215	39.0922	52.1636	53.4566	54.6062	57.3828	45.546	64.0805	57.2212	58.2049	44.1598	0	18.8787		-0.031014	-0.0395736	-0.105089	-0.0344403	0.105122	-0.0148411
128.9	2.27984	48.6658	46.4968	45.2367	48.9512	56.0146	43.6973	39.4618	47.4215	39.0922	52.1636	53.4546	54.6041	57.3806	45.5442	64.078	57.219	58.2027	44.1581	0	18.878		-0.0310332	-0.0395928	-0.105108	-0.0344596	0.105103	-0.0148604
129	2.30391	48.6658	46.4968	45.2367	48.9512	56.0146	43.6973	39.4618	47.4215	39.0922	52.1636	53.4525	54.602	57.3784	45.5425	64.0755	57.2168	58.2004	44.1564	0	18.8773		-0.0310524	-0.039612	-0.105127	-0.0344788	0.105084	-0.0148796
129.1	2.32798	48.6658	46.4968	45.2367	48.9512	56.0146	43.6973	39.4618	47.4215	39.0922	52.1636	53.4504	54.5999	57.3762	45.5407	64.0731	57.2146	58.1982	44.1547	0	18.8766		-0.0310716	-0.0396311	-0.105146	-0.0344979	0.105065	-0.0148988
129.2	2.35203	48.6658	46.4968	45.2367	48.9512	56.0146	43.6973	39.4618	47.4215	39.0922	52.1636	53.4484	54.5978	57.374	45.539	64.0706	57.2124	58.196	44.153	0	18.8758		-0.0310907	-0.0396502	-0.105165	-0.034517	0.105046	-0.0149179
129.3	2.37603	48.6658	46.4968	45.2367	48.9512	56.0146	43.6973	39.4618	47.4215	39.0922	52.1636	53.4464	54.5957	57.3718	45.5373	64.0682	57.2102	58.1937	44.1513	0	18.8751		-0.0311097	-0.0396693	-0.105183	-0.0345361	0.105027	-0.014937
129.4	2.39999	48.6658	46.4968	45.2367	48.9512	56.0146	43.6973	39.4618	47.4215	39.0922	52.1636	53.4443	54.5937	57.3696	45.5355	64.0658	57.208	58.1915	44.1497	0	18.8744		-0.0311288	-0.0396883	-0.105202	-0.0345551	0.105008	-0.014956
129.5	2.42388	48.6658	46.4968	45.2367	48.9512	56.0146	43.6973	39.4618	47.4215	39.0922	52.1636	53.4423	54.5916	57.3674	45.5338	64.0633	57.2058	58.1893	44.148	0	18.8737		-0.0311477	-0.0397072	-0.105221	-0.0345741	0.10499	-0.014975
129.6	2.4477	48.6658	46.4968	45.2367	48.9512	56.0146	43.6973	39.4618	47.4215	39.0922	52.1636	53.4403	54.5895	57.3653	45.5321	64.0609	57.2037	58.1871	44.1463	0	18.873		-0.0311666	-0.0397261	-0.10524	-0.034593	0.104971	-0.0149939
129.7	2.47141	48.6658	46.4968	45.2367	48.9512	56.0146	43.6973	39.4618	47.4215	39.0922	52.1636	53.4383	54.5875	57.3631	45.5304	64.0585	57.2015	58.1849	44.1446	0	18.8722		-0.0311855	-0.039745	-0.105258	-0.0346118	0.104952	-0.0150128
129.8	2.49502	48.6658	46.4968	45.2367	48.9512	56.0146	43.6973	39.4618	47.4215	39.0922	52.1636	53.4362	54.5854	57.3609	45.5286	64.0561	57.1994	58.1827	44.143	0	18.8715		-0.0312044	-0.0397638	-0.105277	-0.0346307	0.104934	-0.0150316
129.9	2.5185	48.6658	46.4968	45.2367	48.9512	56.0146	43.6973	39.4618	47.4215	39.0922	52.1636	53.4342	54.5834	57.3588	45.5269	64.0537	57.1972	58.1805	44.1413	0	18.8708		-0.0312231	-0.0397826	-0.105296	-0.0346494	0.104915	-0.0150504
130	2.54184	48.6658	46.4968	45.2367	48.9512	56.0146	43.6973	39.4618	47.4215	39.0922	52.1636	53.4322	54.5813	57.3566	45.5252	64.0513	57.1951	58.1784	44.1397	0	18.8701		-0.0312419	-0.0398013	-0.105314	-0.0346682	0.104897	-0.0150692
130.1	2.56503	48.6658	46.4968	45.2367	48.9512	56.0146	43.6973	39.4618	47.4215	39.0922	52.1636	53.4302	54.5793	57.3545	45.5235	64.0489	57.1929	58.1762	44.138	0	18.8694		-0.0312606	-0.03982	-0.105333	-0.0346869	0.104878	-0.0150879
130.2	2.58804	48.6658	46.4968	45.2367	48.9512	56.0146	43.6973	39.4618	47.4215	39.0922	52.1636	53.4282	54.5772	57.3523	45.5218	64.0465	57.1908	58.174	44.1364	0	18.8687
130.3	2.61086	48.6658	46.4968	45.2367	48.9512	56.0146	43.6973	39.4618	47.4215	39.0922	52.1636	53.4262	54.5752	57.3502	45.5201	64.0441	57.1887	58.1718	44.1347	0	18.868
130.4	2.63347	48.6658	46.4968	45.2367	48.9512	56.0146	43.6973	39.4618	47.4215	39.0922	52.1636	53.4243	54.5732	57.3481	45.5184	64.0417	57.1865	58.1697	44.1331	0	18.8673
130.5	2.65586	48.6658	46.4968	45.2367	48.9512	56.0146	43.6973	39.4618	47.4215	39.0922	52.1636	53.4223	54.5711	57.346	45.5167	64.0393	57.1844	58.1675	44.1315	0	18.8666
130.6	2.67801	48.6658	46.4968	45.2367	48.9512	56.0146	43.6973	39.4618	47.4215	39.0922	52.1636	53.4203	54.5691	57.3438	45.5151	64.037	57.1823	58.1654	44.1298	0	18.8659
130.7	2.69991	48.6658	46.4968	45.2367	48.9512	56.0146	43.6973	39.4618	47.4215	39.0922	52.1636	53.4183	54.5671	57.3417	45.5134	64.0346	57.1802	58.1632	44.1282	0	18.8652
130.8	2.72153	48.6658	46.4968	45.2367	48.9512	56.0146	43.6973	39.4618	47.4215	39.0922	52.1636	53.4164	54.5651	57.3396	45.5117	64.0322	57.1781	58.1611	44.1266	0	18.8645
130.9	2.74287	48.6658	46.4968	45.2367	48.9512	56.0146	43.6973	39.4618	47.4215	39.0922	52.1636	53.4144	54.5631	57.3375	45.51	64.0299	57.176	58.159	44.125	0	18.8638
131	2.76391	48.6658	46.4968	45.2367	48.9512	56.0146	43.6973	39.4618	47.4215	39.0922	52.1636	53.4125	54.5611	57.3354	45.5084	64.0276	57.1739	58.1568	44.1233	0	18.8631
131.1	2.78463	48.6658	46.4968	45.2367	48.9512	56.0146	43.6973	39.4618	47.4215	39.0922	52.1636	53.4105	54.5591	57.3333	45.5067	64.0252	57.1718	58.1547	44.1217	0	18.8624
131.2	2.80502	48.6658	46.4968	45.2367	48.9512	56.0146	43.6973	39.4618	47.4215	39.0922	52.1636	53.4086	54.5571	57.3312	45.5051	64.0229	57.1697	58.1526	44.1201	0	18.8618
131.3	2.82506	49.4658	46.4968	45.2367	48.9512	56.0146	43.6973	39.4618	47.4215	39.0922	52.1636	53.4066	54.5552	57.3291	45.5034	64.0206	57.1677	58.1505	44.1185	0	18.8611
131.4	2.84475	50.3734	46.4968	45.2367	48.9512	56.0146	43.6973	39.4618	47.4215	39.0922	52.1636	53.4047	54.5532	57.3271	45.5018	64.0182	57.1656	58.1484	44.1169	0	18.8604
131.5	2.86407	51.5987	47.2951	45.2367	48.9512	56.0146	43.6973	39.4618	47.4215	39.0922	52.1636	53.4028	54.5512	57.325	45.5001	64.0159	57.1635	58.1463	44.1153	0	18.8597
131.6	2.88301	53.3368	48.2008	45.2367	48.9512	56.0146	43.6973	39.4618	47.4215	39.0922	52.1636	53.4008	54.5492	57.3229	45.4985	64.0136	57.1615	58.1442	44.1137	0	18.859
131.7	2.90156	55.759	49.4233	45.2367	48.9512	56.0146	43.6973	39.4618	47.4215	39.0922	52.1636	54.4669	54.5473	57.3209	45.4968	64.0113	57.1594	58.1421	44.1121	0	18.8584
131.8	2.91971	59.0046	51.1577	45.2367	48.9512	56.0146	43.6973	39.4618	47.4215	39.0922	52.1636	55.6765	54.5453	57.3188	45.4952	64.009	57.1574	58.14	44.1106	0	18.8577
131.9	2.93745	63.1743	53.5746	45.2367	48.9512	56.0146	43.6973	39.4618	47.4215	39.0922	52.1636	57.3099	54.5434	57.3168	45.4936	64.0067	57.1553	58.1379	44.109	0	18.857
132	2.95478	68.3257	56.8131	45.2367	48.9512	56.0146	44.5357	39.4618	47.4215	39.0922	52.1636	59.6278	54.5414	57.3147	45.4919	64.0044	57.1533	58.1358	44.1074	0	18.8563
132.1	2.97169	74.4704	60.9736	46.0168	49.6665	56.0146	45.4868	39.4618	47.4215	39.0922	52.1636	62.8586	55.1006	57.3127	45.4903	64.0022	57.1512	58.1338	44.1058	0	18.8557
132.2	2.98816	81.5736	66.1138	46.9018	50.4779	56.0146	46.7708	39.4618	47.4215	39.0922	52.1636	67.1881	55.7353	58.3942	45.4887	63.9999	57.9675	58.1317	44.1043	0	18.855
132.3	3.0042	89.5557	72.245	48.0964	51.5734	56.0146	48.5922	39.4618	47.4215	39.0922	52.8412	72.7506	56.5926	59.6214	45.4871	63.9976	58.8937	58.1296	44.1027	0	18.8543
132.4	3.01979	98.296	79.3327	49.7911	53.1273	56.0146	51.1305	39.4618	47.4215	39.0922	53.6098	79.6229	57.8096	61.2786	45.4855	63.9954	60.1447	58.1276	44.1012	0	18.8537
132.5	3.03493	107.638	87.2973	52.1529	55.2929	56.0146	54.5316	39.4618	47.4215	39.0922	54.6474	87.8202	59.5063	63.6302	45.4839	64.7765	61.9202	57.8948	44.0996	0	18.853
132.6	3.04962	117.398	96.0185	55.3174	58.1946	56.0146	58.9012	40.3087	47.4215	39.8467	56.1194	97.296	61.7802	66.9081	45.4823	65.6629	64.3951	57.631	44.098	0	18.8523
132.7	3.06384	127.372	105.34	59.383	61.9226	56.0146	64.2995	41.2694	47.4215	40.7028	58.1706	107.944	64.7021	71.3007	45.4807	66.8602	67.7118	57.2756	44.0965	0	18.8517
132.8	3.0776	137.346	115.079	64.4057	66.5281	56.0146	70.7387	42.5663	48.1445	41.8583	60.9192	119.603	68.3121	76.9444	45.4791	68.5596	71.9733	56.7724	44.095	0	18.851
132.9	3.09087	147.106	125.031	70.397	72.0218	56.5783	78.1823	44.406	48.9648	43.4976	64.4504	132.064	72.6184	83.9169	46.4047	70.9287	77.2383	56.0719	45.0276	0	18.8503
133	3.10366	156.448	134.983	77.3228	78.3724	57.2178	86.547	46.9698	50.0722	45.7821	68.8129	145.082	77.5964	92.2338	47.4548	74.1036	83.5186	55.1341	46.0858	0	18.8497
133.1	3.11597	165.189	144.722	85.1056	85.5088	58.0811	95.7062	50.4052	51.643	48.8432	74.0166	158.385	83.1904	101.848	48.873	78.1831	90.7785	53.9298	47.5148	0	18.849
133.2	3.12777	173.171	154.044	93.6276	93.323	59.3057	105.496	54.8187	53.8321	52.7758	80.032	171.686	89.3156	112.651	50.8853	83.2232	98.9365	52.4426	49.5425	0	18.8484
133.3	3.13906	180.274	162.765	102.737	101.676	61.0124	115.724	60.2713	56.7654	57.6343	86.7918	184.701	95.8624	124.481	53.6902	89.2353	107.869	50.6691	52.3687	0	18.8477
133.4	3.14984	186.419	170.729	112.253	110.401	63.2991	126.176	66.7753	60.5338	63.4296	94.1936	197.158	102.702	137.124	57.4489	96.1853	117.417	48.6194	56.156	0	18.8471
133.5	3.1601	191.57	177.817	121.978	119.319	66.237	136.628	74.2938	65.1895	70.1289	102.105	208.812	109.69	150.332	62.2781	103.995	127.391	46.3164	61.0219	0	18.8464
133.6	3.16982	195.74	183.948	131.702	128.236	69.8665	146.856	82.7426	70.7428	77.6572	110.371	219.452	116.679	163.828	68.2443	112.547	137.582	43.795	67.0334	0	18.8458
133.7	3.179	198.985	189.088	141.219	136.962	74.1959	156.646	91.9939	77.1625	85.9005	118.817	228.92	123.516	177.324	75.3609	121.687	147.774	41.1002	74.204	0	18.8451
133.8	3.18762	201.407	193.249	150.328	145.314	79.2006	165.805	101.882	84.3764	94.7116	127.264	237.109	130.061	190.529	83.5875	131.235	157.746	38.2852	82.4931	0	18.8445
133.9	3.19568	203.146	196.488	158.85	153.128	84.8246	174.169	112.213	92.2756	103.917	135.529	243.972	136.183	203.168	92.8317	140.992	167.29	35.4088	91.8075	0	18.8439
134	3.20317	204.371	198.904	166.632	160.265	90.9828	181.613	122.77	100.719	113.323	143.441	249.525	141.773	214.992	102.954	150.748	176.218	32.5325	102.006	0	18.8432
134.1	3.21007	205.278	200.639	173.558	166.615	97.5651	188.052	133.327	109.54	122.73	150.842	253.846	146.747	225.788	113.772	160.294	184.371	29.7181	112.907	0	18.8426
134.2	3.21638	206.078	201.861	179.55	172.109	104.442	193.451	143.658	118.554	131.935	157.602	257.068	151.049	235.394	125.074	169.431	191.625	27.0243	124.294	0	18.8419
134.3	3.22209	206.078	202.767	184.572	176.715	111.469	197.82	153.546	127.568	140.746	163.618	259.377	154.655	243.702	136.622	177.978	197.898	24.5042	135.931	0	18.8413
134.4	3.22717	206.078	203.565	188.638	180.442	118.496	201.221	162.798	136.388	148.99	168.821	261.003	157.572	250.666	148.17	185.783	203.156	22.2027	147.566	0	18.8407
134.5	3.23163	206.078	203.565	191.802	183.344	125.373	203.76	171.247	144.832	156.518	173.184	262.204	159.841	256.3	159.47	192.727	207.411	20.1548	158.951	0	18.84
134.6	3.23545	206.078	203.565	194.164	185.51	131.955	205.581	178.765	152.731	163.217	176.715	263.262	161.533	260.684	170.285	198.733	210.721	18.3832	169.848	0	18.8394
134.7	3.23863	206.078	203.565	195.859	187.064	138.114	206.865	185.269	159.945	169.012	179.464	263.253	162.746	263.953	180.402	203.767	213.189	16.898	180.042	0	18.8388
134.8	3.24115	206.078	203.565	197.053	188.159	143.738	207.816	190.722	166.365	173.871	181.515	263.245	163.599	266.296	189.64	207.84	214.958	15.6958	189.351	0	18.8381
134.9	3.243	206.078	203.565	197.938	188.971	148.742	208.654	195.135	171.918	177.804	182.987	263.236	164.229	267.945	197.86	211.008	216.203	14.76	197.633	0	18.8375
135	3.24417	206.078	203.565	198.719	189.686	153.072	208.654	198.57	176.574	180.865	184.024	263.227	164.785	269.164	204.969	213.371	217.123	14.0615	204.796	0	18.8369
135.1	3.24467	206.078	203.565	198.719	189.686	156.701	208.654	201.134	180.342	183.149	184.793	263.219	164.779	270.238	210.927	215.064	217.934	13.5602	210.8	0	18.8363
135.2	3.24447	206.078	203.565	198.719	189.686	159.639	208.654	202.974	183.275	184.788	185.471	263.21	164.774	270.229	215.749	216.256	217.926	13.2067	215.658	0	18.8356
135.3	3.24359	205.123	203.565	198.719	189.686	161.926	208.654	204.271	185.464	185.944	185.471	263.201	164.768	270.22	219.5	217.137	217.919	12.9448	219.438	0	18.835
135.4	3.242	204.039	203.565	198.719	189.686	163.632	208.654	205.232	187.035	186.8	185.471	263.193	164.763	270.211	222.297	217.912	217.912	12.7138	222.256	0	18.8344
135.5	3.23971	202.575	203.565	198.719	189.686	164.857	208.654	206.078	188.143	187.555	185.471	261.953	164.757	270.202	224.303	217.905	217.905	12.7134	224.277	0	18.8338
135.6	3.23672	200.499	203.463	198.719	189.686	165.72	208.654	206.078	188.963	187.555	185.471	260.547	164.752	270.193	225.714	217.898	217.898	12.713	225.699	0	18.8332
135.7	3.23301	197.605	203.347	198.719	189.686	166.36	208.654	206.078	189.686	187.555	185.471	258.653	164.747	270.185	226.757	217.891	217.891	12.7126	226.75	0	18.8326
135.8	3.2286	193.729	203.19	198.719	189.686	166.924	208.654	206.078	189.686	187.555	185.471	255.97	164.741	270.176	227.676	217.884	217.884	12.7122	227.676	0	18.832
135.9	3.22348	188.748	202.968	198.719	189.686	166.924	208.654	206.078	189.686	187.555	185.471	252.234	164.736	268.862	227.669	217.877	217.877	12.7117	227.669	0	18.8313
136	3.21765	182.594	202.658	198.719	189.686	166.924	207.65	206.078	189.686	187.555	185.471	247.231	164.731	267.373	227.661	217.87	217.87	12.7113	227.661	0	18.8307
136.1	3.21111	175.254	202.243	198.719	189.686	166.924	206.51	206.078	189.686	187.555	185.471	240.807	164.725	265.366	227.654	217.863	217.863	12.7109	227.654	0	18.8301
136.2	3.20388	166.769	201.71	198.719	189.686	166.924	204.971	206.078	189.686	187.555	185.471	232.873	164.72	262.522	227.647	217.856	217.856	12.7105	227.647	0	18.8295
136.3	3.19594	157.235	201.051	197.795	189.686	166.924	202.788	206.078	189.686	187.555	185.471	223.411	164.715	258.563	227.639	217.849	217.849	12.7101	227.639	0	18.8289
136.4	3.18731	146.794	200.265	196.747	189.686	166.924	199.746	206.078	189.686	187.555	185.471	212.474	164.709	253.261	227.632	217.842	217.842	12.7097	227.632	0	18.8283
136.5	3.178	135.635	199.356	195.333	188.812	166.924	195.67	206.078	189.686	187.555	185.471	200.186	164.704	246.453	227.625	217.835	217.835	12.7093	227.625	0	18.8277
136.6	3.168	123.976	198.336	193.327	187.821	166.924	190.433	206.078	189.686	187.555	185.471	186.733	164.699	238.044	227.618	217.828	217.828	12.7089	227.618	0	18.8271
136.7	3.15733	112.062	197.218	190.531	186.484	166.924	183.964	205.099	189.686	187.555	185.471	172.354	164.694	228.015	227.61	217.821	217.821	12.7085	227.61	0	18.8265
136.8	3.14599	100.148	196.023	186.784	184.586	166.924	176.246	203.987	189.686	187.555	184.615	157.333	164.688	216.425	227.603	217.814	216.775	12.7081	227.603	0	18.8259
136.9	3.13401	88.4897	194.775	181.971	181.941	166.924	167.326	202.486	189.686	187.555	183.644	141.985	164.683	203.401	227.596	217.807	215.59	12.7077	227.596	0	18.8253
137	3.12138	77.3301	193.499	176.025	178.397	166.924	157.301	200.358	189.686	186.658	182.333	126.637	164.678	189.143	227.589	217.8	213.992	12.7073	227.589	0	18.8247
137.1	3.10812	66.8897	192.223	168.932	173.845	166.924	146.324	197.391	189.686	185.64	180.473	111.619	164.673	173.903	227.582	217.793	211.729	12.7069	227.582	0	18.8241
137.2	3.09426	57.3549	190.975	160.733	168.22	166.924	134.591	193.416	188.778	184.267	177.881	97.2453	164.668	157.984	227.574	216.748	208.578	12.7065	227.574	0	18.8235
137.3	3.07979	48.8699	189.78	151.519	161.511	166.924	122.333	188.309	187.748	182.318	174.409	83.798	164.663	141.716	226.48	215.564	204.358	12.7061	226.479	0	18.8229
137.4	3.06475	41.53	188.662	141.43	153.755	166.924	109.807	182	186.358	179.603	169.948	71.5178	164.657	125.45	225.24	213.967	198.94	12.7057	225.238	0	18.8224
137.5	3.04914	35.3766	187.641	130.646	145.04	166.924	97.2812	174.475	184.386	175.965	164.436	60.5901	164.652	109.534	223.568	211.705	192.247	12.7053	223.565	0	18.8218
137.6	3.03299	30.3958	186.733	119.38	135.497	166.924	85.0236	165.775	181.638	171.291	157.862	51.1374	164.647	94.2992	221.199	208.555	184.265	12.7049	221.195	0	18.8212
137.7	3.01631	26.5188	185.947	107.867	125.297	166.924	73.2907	155.999	177.956	165.516	150.262	43.213	164.642	80.0471	217.901	204.338	175.04	12.7045	217.895	0	18.8206
137.8	2.99911	23.6255	185.288	96.3542	114.64	166.924	62.3138	145.295	173.225	158.628	141.721	36.7989	164.637	67.0319	213.484	198.921	164.674	12.7041	213.475	0	18.82
137.9	2.98141	21.5492	184.755	85.0882	103.75	166.169	52.2891	133.853	167.38	150.666	132.37	31.8063	164.632	55.4502	207.812	192.232	153.325	12.7037	207.799	0	18.8194
138	2.96324	20.0857	184.34	74.3043	92.8603	165.312	43.3682	121.9	160.409	141.718	122.374	28.0803	164.627	45.4318	200.806	184.254	141.196	12.7033	200.789	0	18.8189
138.1	2.9446	19.0015	184.03	64.2153	82.2039	164.156	35.651	109.684	152.35	131.92	111.932	25.4066	164.622	37.0332	192.452	175.033	128.525	12.7029	192.429	0	18.8183
138.2	2.92551	18.0458	183.808	55.0015	72.0035	162.515	29.1814	97.469	143.294	121.448	101.261	23.5216	164.617	30.2353	182.796	164.672	115.577	12.7025	182.767	0	18.8177
138.3	2.906	18.0458	183.651	46.8022	62.4604	160.229	23.9447	85.5156	133.377	110.507	90.5892	22.1253	163.86	24.9441	171.946	153.329	102.631	12.7022	171.91	0	18.8171
138.4	2.88609	18.0458	183.535	39.7093	53.7451	157.166	19.8686	74.0738	122.778	99.3266	80.1468	20.8943	163.003	20.9953	160.067	141.205	89.9622	12.7018	160.024	0	18.8166
138.5	2.86578	18.0458	183.432	33.763	45.9895	153.231	16.8265	63.3693	111.705	88.1462	70.1512	20.8937	161.848	18.1617	147.371	128.541	77.8366	12.7014	147.32	0	18.816
138.6	2.84511	18.0458	183.432	28.9499	39.2804	148.369	14.6436	53.5934	100.389	77.2054	60.7997	20.8931	160.211	16.1642	134.108	115.599	66.4929	12.701	134.048	0	18.8154
138.7	2.82409	18.0458	183.432	25.2035	33.6559	142.57	13.1049	44.8938	89.0726	66.733	52.2594	20.8924	157.932	14.6845	120.556	102.659	56.1336	12.7006	120.487	0	18.8148
138.8	2.80273	18.0458	183.432	22.4075	29.1032	135.866	11.965	37.3682	77.9993	56.9353	44.6595	20.8918	154.88	13.3801	107.004	89.9961	46.9154	12.7002	106.927	0	18.8143
138.9	2.78107	18.0458	183.432	20.4012	25.5595	128.333	10.9602	31.0592	67.3999	47.9875	38.0851	20.8912	150.961	13.3797	93.7439	77.8763	38.9414	12.6998	93.6585	0	18.8137
139	2.75911	18.0458	183.432	18.9868	22.9148	120.084	10.9602	25.9524	57.4835	40.025	32.5735	20.8906	146.12	13.3793	81.0518	66.5379	32.2566	12.6995	80.9583	0	18.8131
139.1	2.73688	18.0458	183.432	17.9392	21.017	111.268	10.9602	21.9774	48.4273	33.137	28.1122	20.8899	140.347	13.3789	69.1781	56.1836	26.8458	12.6991	69.077	0	18.8126
139.2	2.7144	18.0458	183.432	17.0157	19.6792	102.056	10.9602	19.0109	40.3682	27.3624	24.6397	20.8893	133.675	13.3785	58.3348	46.9697	22.6343	12.6987	58.2269	0	18.812
139.3	2.69169	18.0458	183.432	17.0157	18.6882	92.6435	10.9602	16.8822	33.3967	22.6882	22.0481	20.8887	126.178	13.3781	48.6859	38.9994	19.4913	12.6983	48.5718	0	18.8115
139.4	2.66876	18.0458	183.432	17.0157	17.8147	83.2306	10.9602	15.3815	27.5521	19.05	20.1884	20.8881	117.97	13.3777	40.3394	32.3178	17.2359	12.6979	40.2199	0	18.8109
139.5	2.64563	18.0458	183.432	17.0157	17.8147	74.0195	10.9602	14.27	22.8213	16.3348	18.8775	20.8874	109.198	13.3773	33.3423	26.9096	15.6459	12.6976	33.2184	0	18.8103
139.6	2.62233	18.0458	183.432	17.0157	17.8147	65.2026	10.9602	13.2901	19.139	14.3864	17.9064	20.8868	100.033	13.377	27.6787	22.7001	14.4681	12.6972	27.5512	0	18.8098
139.7	2.59887	18.0458	183.432	17.0157	17.8147	56.9538	10.9602	13.2901	16.3909	13.0129	17.0504	20.8862	90.6691	13.3766	23.2705	19.5585	13.4298	12.6968	23.1402	0	18.8092
139.8	2.57528	18.0458	183.432	17.0157	17.8147	49.4206	10.9602	13.2901	14.4189	11.9955	17.0504	20.8856	81.3053	13.3762	19.9806	17.3042	13.4294	12.6964	19.8481	0	18.8087
139.9	2.55156	18.0458	183.432	17.0157	17.8147	42.7169	10.9602	13.2901	13.0287	11.0986	17.0504	20.885	72.1427	13.3758	17.6198	15.7149	13.429	12.6961	17.4859	0	18.8081
140	2.52775	18.0458	183.432	17.0157	17.8147	36.9177	10.9602	13.2901	11.999	11.0986	17.0504	20.8844	63.3728	13.3754	15.9556	14.5377	13.4286	12.6957	15.8206	0	18.712
140.1	2.50387	18.0458	183.432	17.0157	17.8147	32.0561	10.9602	13.2901	11.0913	11.0986	17.0504	20.8838	55.1683	13.375	14.7227	13.4999	13.4282	12.6953	14.5869	0	18.603
140.2	2.47992	18.0458	182.573	17.0157	17.8147	28.1208	10.9602	13.2901	11.0913	11.0986	17.0504	20.8831	47.6758	13.3746	13.636	13.4995	13.4278	12.695	13.4995	0	18.4561
140.3	2.45594	18.0458	181.599	17.0157	17.8147	25.0578	10.9602	13.2901	11.0913	11.0986	17.0504	20.8825	41.0085	13.3742	13.6356	13.4991	13.4275	12.6946	13.4991	0	18.2479
140.4	2.43195	18.0458	180.283	17.0157	17.8147	22.7718	10.9602	13.2901	11.0913	11.0986	17.0504	20.8819	35.2411	13.3738	13.6352	13.4987	13.4271	12.6942	13.4987	0	17.958
140.5	2.40797	18.0458	178.416	17.0157	17.8147	21.1314	10.9602	13.2901	11.0913	11.0986	17.0504	20.8813	30.4062	13.3734	13.6348	13.4983	13.4267	12.6939	13.4983	0	17.5697
140.6	2.38401	18.0458	175.815	17.0157	17.8147	19.9751	10.9602	13.2901	11.0913	11.0986	17.0504	20.8807	26.4927	13.373	13.6344	13.4979	13.4263	12.6935	13.4979	0	17.0711
140.7	2.3601	18.0458	172.329	17.0157	17.8147	19.1185	10.9602	13.2901	11.0913	11.0986	17.0504	20.8801	23.4465	13.3727	13.634	13.4976	13.4259	12.6931	13.4976	0	16.4553
140.8	2.33627	18.0458	167.851	17.0157	17.8147	18.3634	10.9602	13.2901	11.0913	11.0986	17.0504	20.8795	21.1731	13.3723	13.6336	13.4972	13.4255	12.6928	13.4972	0	15.7208
140.9	2.31253	18.0458	162.319	17.0157	17.8147	18.3634	10.9602	13.2901	11.0913	11.0986	17.0504	20.8789	19.5417	13.3719	13.6332	13.4968	13.4251	12.6924	13.4968	0	14.8719
141	2.28891	18.0458	155.719	17.0157	17.8147	18.3634	10.9602	13.2901	11.0913	11.0986	17.0504	20.8783	18.3915	13.3715	13.6328	13.4964	13.4247	12.692	13.4964	0	13.918
141.1	2.26543	18.0458	148.091	17.0157	17.8147	18.3634	10.9602	13.2901	11.0913	11.0986	17.0504	20.8777	17.5394	13.3711	13.6324	13.496	13.4244	12.6917	13.496	0	12.8737
141.2	2.24211	18.0458	139.518	17.0157	17.8147	18.3634	10.9602	13.2901	11.0913	11.0986	17.0504	20.8771	16.7883	13.3708	13.632	13.4956	13.424	12.6913	13.4956	0	11.7575
141.3	2.21898	18.0458	130.132	17.0157	17.8147	18.3634	10.9602	13.2901	11.0913	11.0986	17.0504	20.8765	16.7879	13.3704	13.6317	13.4952	13.4236	12.6909	13.4952	0	10.5915
141.4	2.19605	18.0458	120.098	17.0157	17.8147	18.3634	10.9602	13.2901	11.0913	11.0986	17.0504	20.876	16.7874	13.37	13.6313	13.4949	13.4232	12.6906	13.4949	0	9.4
141.5	2.17336	18.0458	109.617	17.0157	17.8147	18.3634	10.9602	13.2901	11.0913	11.0986	17.0504	20.8754	16.7869	13.3696	13.6309	13.4945	13.4228	12.6902	13.4945	0	8.20858
141.6	2.15091	18.0458	98.905	17.0157	17.8147	18.3634	10.9602	13.2901	11.0913	11.0986	17.0504	20.8748	16.7864	13.3692	13.6305	13.4941	13.4225	12.6899	13.4941	0	7.04277
141.7	2.12874	18.0458	88.1935	17.0157	17.8147	18.3634	10.9602	13.2901	11.0913	11.0986	17.0504	20.8742	16.786	13.3689	13.6301	13.4937	13.4221	12.6895	13.4937	0	5.9269
141.8	2.10687	18.0458	77.7117	17.0157	17.8147	18.3634	10.9602	13.2901	11.0913	11.0986	17.0504	20.8736	16.7855	13.3685	13.6297	13.4933	13.4217	12.6892	13.4933	0	4.88299
141.9	2.08532	18.0458	67.6784	17.0157	17.8147	18.3634	10.9602	13.2901	11.0913	11.0986	17.0504	20.873	16.785	13.3681	13.6294	13.493	13.4213	12.6888	13.493	0	3.92967
142	2.06411	18.0458	58.2917	17.0157	17.8147	18.3634	10.9602	13.2901	11.0913	11.0986	17.0504	20.8724	16.7846	13.3677	13.629	13.4926	13.421	12.6885	13.4926	0	3.08136
142.1	2.04326	18.0458	49.7193	17.0157	17.8147	18.3634	10.9602	13.2901	11.0913	11.0986	17.0504	20.8719	16.7841	13.3674	13.6286	13.4922	13.4206	12.6881	13.4922	0	2.34755
142.2	2.02281	18.0458	42.0907	17.0157	17.8147	18.3634	10.9602	13.2901	11.0913	11.0986	17.0504	20.8713	16.7836	13.367	13.6282	13.4918	13.4202	12.6877	13.4918	0	1.73239
142.3	2.00277	18.0458	35.4915	17.0157	17.8147	18.3634	10.9602	13.2901	11.0913	11.0986	17.0504	20.8707	16.7832	13.3666	13.6278	13.4915	13.4198	12.6874	13.4915	0	1.23447
142.4	1.98316	18.0458	29.9592	17.0157	17.8147	18.3634	10.9602	13.2901	11.0913	11.0986	17.0504	20.8701	16.7827	13.3663	13.6275	13.4911	13.4195	12.687	13.4911	0	0.846921
142.5	1.96401	18.0458	25.4811	17.0157	17.8147	18.3634	10.9602	13.2901	11.0913	11.0986	17.0504	20.8695	16.7822	13.3659	13.6271	13.4907	13.4191	12.6867	13.4907	0	0.557698
142.6	1.94535	18.0458	21.9955	17.0157	17.8147	18.3634	10.9602	13.2901	11.0913	11.0986	17.0504	20.869	16.7818	13.3655	13.6267	13.4904	13.4187	12.6863	13.4904	0	0.350167
142.7	1.92718	18.0458	19.3941	17.0157	17.8147	18.3634	10.9602	13.2901	11.0913	11.0986	17.0504	20.8684	16.7813	13.3652	13.6263	13.49	13.4184	12.686	13.49	0	0.203877
142.8	1.90953	18.0458	17.5274	17.0157	17.8147	18.3634	10.9602	13.2901	11.0913	11.0986	17.0504	20.8678	16.7809	13.3648	13.626	13.4896	13.418	12.6857	13.4896	0	0.0955156
142.9	1.89242	18.0458	16.2116	17.0157	17.8147	18.3634	10.9602	13.2901	11.0913	11.0986	17.0504	20.8673	16.7804	13.3644	13.6256	13.4892	13.4176	12.6853	13.4892	0	0
143	1.87586	18.0458	15.2368	17.0157	17.8147	18.3634	10.9602	13.2901	11.0913	11.0986	17.0504	20.8667	16.7799	13.3641	13.6252	13.4889	13.4173	12.685	13.4889	0	0
143.1	1.85988	18.0458	14.3776	17.0157	17.8147	18.3634	10.9602	13.2901	11.0913	11.0986	17.0504	20.8661	16.7795	13.3637	13.6249	13.4885	13.4169	12.6846	13.4885	0	0
143.2	1.84449	18.0458	14.3776	17.0157	17.8147	18.3634	10.9602	13.2901	11.0913	11.0986	17.0504	20.8656	16.779	13.3633	13.6245	13.4881	13.4165	12.6843	13.4881	0	0
143.3	1.82971	18.0458	14.3776	17.0157	17.8147	18.3634	10.9602	13.2901	11.0913	11.0986	17.0504	20.865	16.7786	13.363	13.6241	13.4878	13.4162	12.6839	13.4878	0	0
143.4	1.81554	18.0458	14.3776	17.0157	17.8147	18.3634	10.9602	13.2901	11.0913	11.0986	17.0504	20.8644	16.7781	13.3626	13.6237	13.4874	13.4158	12.6836	13.4874	0	0
143.5	1.802	18.0458	14.3776	17.0157	17.8147	18.3634	10.9602	13.2901	11.0913	11.0986	17.0504	20.8639	16.7777	13.3623	13.6234	13.4871	13.4155	12.6832	13.4871	0	0
143.6	1.7891	18.0458	14.3776	17.0157	17.8147	18.3634	10.9602	13.2901	11.0913	11.0986	17.0504	20.8633	16.7772	13.3619	13.623	13.4867	13.4151	12.6829	13.4867	0	0
143.7	1.77685	18.0458	14.3776	17.0157	17.8147	18.3634	10.9602	13.2901	11.0913	11.0986	17.0504	20.8628	16.7768	13.3615	13.6227	13.4863	13.4147	12.6826	13.4863	0	0
143.8	1.76526	18.0458	14.3776	17.0157	17.8147	18.3634	10.9602	13.2901	11.0913	11.0986	17.0504	20.8622	16.7763	13.3612	13.6223	13.486	13.4144	12.6822	13.486	0	0
143.9	1.75433	18.0458	14.3776	17.0157	17.8147	18.3634	10.9602	13.2901	11.0913	11.0986	17.0504	20.8616	16.7759	13.3608	13.6219	13.4856	13.414	12.6819	13.4856	0	0
144	1.74407	18.0458	14.3776	17.0157	17.8147	18.3634	10.9602	13.2901	11.0913	11.0986	17.0504	20.8611	16.7754	13.3605	13.6216	13.4853	13.4137	12.6816	13.4853	0	0
144.1	1.73449	18.0458	14.3776	17.0157	17.8147	18.3634	10.9602	13.2901	11.0913	11.0986	17.0504	20.8605	16.775	13.3601	13.6212	13.4849	13.4133	12.6812	13.4849	0	0
144.2	1.72559	18.0458	14.3776	17.0157	17.8147	18.3634	10.9602	13.2901	11.0913	11.0986	17.0504	20.86	16.7745	13.3598	13.6208	13.4845	13.413	12.6809	13.4845	0	0
144.3	1.71736	18.0458	14.3776	17.0157	17.8147	18.3634	10.9602	13.2901	11.0913	11.0986	17.0504	20.8594	16.7741	13.3594	13.6205	13.4842	13.4126	12.6806	13.4842	0	0
144.4	1.70982	18.0458	14.3776	17.0157	17.8147	18.3634	10.9602	13.2901	11.0913	11.0986	17.0504	20.8589	16.7737	13.3591	13.6201	13.4838	13.4123	12.6802	13.4838	0	0
144.5	1.70296	18.0458	14.3776	17.0157	17.8147	18.3634	10.9602	13.2901	11.0913	11.0986	17.0504	20.8583	16.7732	13.3587	13.6198	13.4835	13.4119	12.6799	13.4835	0	0
144.6	1.69678	18.0458	14.3776	17.0157	17.8147	18.3634	10.9602	13.2901	11.0913	11.0986	17.0504	20.8578	16.7728	13.3584	13.6194	13.4831	13.4116	12.6796	13.4831	0	0
144.7	1.69128	18.0458	14.3776	17.0157	17.8147	18.3634	10.9602	13.2901	11.0913	11.0986	17.0504	20.8573	16.7723	13.358	13.6191	13.4828	13.4112	12.6792	13.4828	0	0
144.8	1.68646	18.0458	14.3776	17.0157	17.8147	18.3634	10.9602	13.2901	11.0913	11.0986	17.0504	20.8567	16.7719	13.3577	13.6187	13.4824	13.4109	12.6789	13.4824	0	0
144.9	1.68232	18.0458	14.3776	17.0157	17.8147	18.3634	10.9602	13.2901	11.0913	11.0986	17.0504	20.8562	16.7715	13.3573	13.6183	13.4821	13.4105	12.6786	13.4821	0	0
145	1.67884	18.0458	14.3776	17.0157	17.8147	18.3634	10.9602	13.2901	11.0913	11.0986	17.0504	20.8556	16.771	13.357	13.618	13.4817	13.4102	12.6782	13.4817	0	0
145.1	1.67603	18.0458	14.3776	17.0157	17.8147	18.3634	10.9602	13.2901	11.0913	11.0986	17.0504	20.8551	16.7706	13.3566	13.6176	13.4814	13.4098	12.6779	13.4814	0	0
145.2	1.67389	18.0458	14.3776	17.0157	17.8147	18.3634	10.9602	13.2901	11.0913	11.0986	17.0504	20.8546	16.7702	13.3563	13.6173	13.481	13.4095	12.6776	13.481	0	0
145.3	1.67239	18.0458	14.3776	17.0157	17.8147	18.3634	10.9602	13.2901	11.0913	11.0986	17.0504	20.854	16.7697	13.3559	13.6169	13.4807	13.4091	12.6773	13.4807	0	0
145.4	1.67154	18.0458	14.3776	17.0157	17.8147	18.3634	10.9602	13.2901	11.0913	11.0986	17.0504	20.8535	16.7693	13.3556	13.6166	13.4803	13.4088	12.6769	13.4803	0	0
145.5	1.67133	18.0458	14.3776	17.0157	17.8147	18.3634	10.9602	13.2901	11.0913	11.0986	17.0504	20.8529	16.7689	13.3553	13.6162	13.48	13.4084	12.6766	13.48	0	0
145.6	1.67174	18.0458	14.3776	17.0157	17.8147	18.3634	10.9602	13.2901	11.0913	11.0986	17.0504	20.8524	16.7685	13.3549	13.6159	13.4796	13.4081	12.6763	13.4796	0	0
145.7	1.67278	18.0458	14.3776	17.0157	17.8147	18.3634	10.9602	13.2901	11.0913	11.0986	17.0504	20.8519	16.768	13.3546	13.6156	13.4793	13.4077	12.676	13.4793	0	0
145.8	1.67442	18.0458	14.3776	17.0157	17.8147	18.3634	10.9602	13.2901	11.0913	11.0986	17.0504	20.8514	16.7676	13.3542	13.6152	13.479	13.4074	12.6756	13.479	0	0
145.9	1.67665	18.0458	14.3776	17.0157	17.8147	18.3634	10.9602	13.2901	11.0913	11.0986	17.0504	20.8508	16.7672	13.3539	13.6149	13.4786	13.4071	12.6753	13.4786	0	0
146	1.67947	18.0458	14.3776	17.0157	17.8147	18.3634	10.9602	13.2901	11.0913	11.0986	17.0504	20.8503	16.7668	13.3536	13.6145	13.4783	13.4067	12.675	13.4783	0	0
146.1	1.68286	18.0458	14.3776	17.0157	17.8147	18.3634	10.9602	13.2901	11.0913	11.0986	17.0504	20.8498	16.7663	13.3532	13.6142	13.4779	13.4064	12.6747	13.4779	0	0
146.2	1.68682	18.0458	14.3776	17.0157	17.8147	18.3634	10.9602	13.2901	11.0913	11.0986	17.0504	20.8493	16.7659	13.3529	13.6138	13.4776	13.4061	12.6744	13.4776	0	0
146.3	1.69132	18.0458	14.3776	17.0157	17.8147	18.3634	10.9602	13.2901	11.0913	11.0986	17.0504	20.8487	16.7655	13.3526	13.6135	13.4773	13.4057	12.674	13.4773	0	0
146.4	1.69635	18.0458	14.3776	17.0157	17.8147	18.3634	10.9602	13.2901	11.0913	11.0986	17.0504	20.8482	16.7651	13.3522	13.6131	13.4769	13.4054	12.6737	13.4769	0	0
146.5	1.7019	18.0458	14.3776	17.0157	17.8147	18.3634	10.9602	13.2901	11.0913	11.0986	17.0504	20.8477	16.7647	13.3519	13.6128	13.4766	13.405	12.6734	13.4766	0	0
146.6	1.70796	18.0458	14.3776	17.0157	17.8147	18.3634	10.9602	13.2901	11.0913	11.0986	17.0504	20.8472	16.7642	13.3516	13.6125	13.4763	13.4047	12.6731	13.4763	0	0
146.7	1.71451	18.0458	14.3776	17.0157	17.8147	18.3634	10.9602	13.2901	11.0913	11.0986	17.0504	20.8467	16.7638	13.3512	13.6121	13.4759	13.4044	12.6728	13.4759	0	0
146.8	1.72154	18.0458	14.3776	17.0157	17.8147	18.3634	10.9602	13.2901	11.0913	11.0986	17.0504	20.8461	16.7634	13.3509	13.6118	13.4756	13.4041	12.6725	13.4756	0	0
146.9	1.72902	18.0458	14.3776	17.0157	17.8147	18.3634	10.9602	13.2901	11.0913	11.0986	17.0504	20.8456	16.763	13.3506	13.6115	13.4753	13.4037	12.6721	13.4753	0	0
147	1.73695	18.0458	14.3776	17.0157	17.8147	18.3634	10.9602	13.2901	11.0913	11.0986	17.0504	20.8451	16.7626	13.3502	13.6111	13.4749	13.4034	12.6718	13.4749	0	0
147.1	1.74531	18.0458	14.3776	17.0157	17.8147	18.3634	10.9602	13.2901	11.0913	11.0986	17.0504	20.8446	16.7622	13.3499	13.6108	13.4746	13.4031	12.6715	13.4746	0	0
147.2	1.75408	18.0458	14.3776	17.0157	17.8147	18.3634	10.9602	13.2901	11.0913	11.0986	17.0504	20.8441	16.7618	13.3496	13.6105	13.4743	13.4027	12.6712	13.4743	0	0
147.3	1.76325	18.0458	14.3776	17.0157	17.8147	18.3634	10.9602	13.2901	11.0913	11.0986	17.0504	20.8436	16.7613	13.3493	13.6101	13.4739	13.4024	12.6709	13.4739	0	0
147.4	1.77279	18.0458	14.3776	17.0157	17.8147	18.3634	10.9602	13.2901	11.0913	11.0986	17.0504	20.8431	16.7609	13.3489	13.6098	13.4736	13.4021	12.6706	13.4736	0	0
147.5	1.7827	18.0458	14.3776	17.0157	17.8147	18.3634	10.9602	13.2901	11.0913	11.0986	17.0504	20.8426	16.7605	13.3486	13.6095	13.4733	13.4017	12.6703	13.4733	0	0
147.6	1.79296	18.0458	14.3776	17.0157	17.8147	18.3634	10.9602	13.2901	11.0913	11.0986	17.0504	20.842	16.7601	13.3483	13.6091	13.4729	13.4014	12.67	13.4729	0	0
147.7	1.80355	18.0458	14.3776	17.0157	17.8147	18.3634	10.9602	13.2901	11.0913	11.0986	17.0504	20.8415	16.7597	13.348	13.6088	13.4726	13.4011	12.6697	13.4726	0	0
147.8	1.81446	18.0458	14.3776	17.0157	17.8147	18.3634	10.9602	13.2901	11.0913	11.0986	17.0504	20.841	16.7593	13.3476	13.6085	13.4723	13.4008	12.6694	13.4723	0	0
147.9	1.82567	18.0458	14.3776	17.0157	17.8147	18.3634	10.9602	13.2901	11.0913	11.0986	17.0504	20.8405	16.7589	13.3473	13.6081	13.472	13.4005	12.6691	13.472	0	0
148	1.83716	18.0458	14.3776	17.0157	17.8147	18.3634	10.9602	13.2901	11.0913	11.0986	17.0504	20.84	16.7585	13.347	13.6078	13.4716	13.4001	12.6688	13.4716	0	0
148.1	1.84892	18.0458	14.3776	17.0157	17.8147	18.3634	10.9602	13.2901	11.0913	11.0986	17.0504	20.8395	16.7581	13.3467	13.6075	13.4713	13.3998	12.6685	13.4713	0	0
148.2	1.86093	18.0458	14.3776	17.0157	17.8147	18.3634	10.9602	13.2901	11.0913	11.0986	17.0504	20.839	16.7577	13.3464	13.6072	13.471	13.3995	12.6681	13.471	0	0
148.3	1.87318	18.0458	14.3776	17.0157	17.8147	18.3634	10.9602	13.2901	11.0913	11.0986	17.0504	20.8385	16.7573	13.346	13.6068	13.4707	13.3992	12.6678	13.4707	0	0
148.4	1.88564	18.0458	14.3776	17.0157	17.8147	18.3634	10.9602	13.2901	11.0913	11.0986	17.0504	20.838	16.7569	13.3457	13.6065	13.4704	13.3988	12.6675	13.4704	0	0
148.5	1.89831	18.0458	14.3776	17.0157	17.8147	18.3634	10.9602	13.2901	11.0913	11.0986	17.0504	20.8376	16.7565	13.3454	13.6062	13.47	13.3985	12.6672	13.47	0	0
148.6	1.91115	18.0458	14.3776	17.0157	17.8147	18.3634	10.9602	13.2901	11.0913	11.0986	17.0504	20.8371	16.7561	13.3451	13.6059	13.4697	13.3982	12.6669	13.4697	0	0
148.7	1.92417	18.0458	14.3776	17.0157	17.8147	18.3634	10.9602	13.2901	11.0913	11.0986	17.0504	20.8366	16.7557	13.3448	13.6055	13.4694	13.3979	12.6666	13.4694	0	0
148.8	1.93732	18.0458	14.3776	17.0157	17.8147	18.3634	10.9602	13.2901	11.0913	11.0986	17.0504	20.8361	16.7553	13.3445	13.6052	13.4691	13.3976	12.6663	13.4691	0	0
148.9	1.95061	18.0458	14.3776	17.0157	17.8147	18.3634	10.9602	13.2901	11.0913	11.0986	17.0504	20.8356	16.7549	13.3441	13.6049	13.4688	13.3973	12.666	13.4688	0	0
149	1.964	18.0458	14.3776	17.0157	17.8147	18.3634	10.9602	13.2901	11.0913	11.0986	17.0504	20.8351	16.7545	13.3438	13.6046	13.4685	13.397	12.6658	13.4685	0	0
149.1	1.97748	18.0458	14.3776	17.0157	17.8147	18.3634	10.9602	13.2901	11.0913	11.0986	17.0504	20.8346	16.7541	13.3435	13.6043	13.4681	13.3966	12.6655	13.4681	0	0
149.2	1.99102	18.0458	14.3776	17.0157	17.8147	18.3634	10.9602	13.2901	11.0913	11.0986	17.0504	20.8341	16.7537	13.3432	13.604	13.4678	13.3963	12.6652	13.4678	0	0
149.3	2.00461	18.0458	14.3776	17.0157	17.8147	18.3634	10.9602	13.2901	11.0913	11.0986	17.0504	20.8336	16.7534	13.3429	13.6036	13.4675	13.396	12.6649	13.4675	0	0
149.4	2.01822	18.0458	14.3776	17.0157	17.8147	18.3634	10.9602	13.2901	11.0913	11.0986	17.0504	20.8332	16.753	13.3426	13.6033	13.4672	13.3957	12.6646	13.4672	0	0
149.5	2.03183	18.0458	14.3776	17.0157	17.8147	18.3634	10.9602	13.2901	11.0913	11.0986	17.0504	20.8327	16.7526	13.3423	13.603	13.4669	13.3954	12.6643	13.4669	0	0
149.6	2.04542	18.0458	14.3776	17.0157	17.8147	18.3634	10.9602	13.2901	11.0913	11.0986	17.0504	20.8322	16.7522	13.342	13.6027	13.4666	13.3951	12.664	13.4666	0	0
149.7	2.05897	18.0458	14.3776	17.0157	17.8147	18.3634	10.9602	13.2901	11.0913	11.0986	17.0504	20.8317	16.7518	13.3417	13.6024	13.4663	13.3948	12.6637	13.4663	0	0
149.8	2.07246	18.0458	14.3776	17.0157	17.8147	18.3634	10.9602	13.2901	11.0913	11.0986	17.0504	20.8312	16.7514	13.3413	13.6021	13.466	13.3945	12.6634	13.466	0	0
149.9	2.08586	18.0458	14.3776	17.0157	17.8147	18.3634	10.9602	13.2901	11.0913	11.0986	17.0504	20.8308	16.751	13.341	13.6018	13.4656	13.3942	12.6631	13.4656	0	0
150	2.09915	18.0458	14.3776	17.0157	17.8147	18.3634	10.9602	13.2901	11.0913	11.0986	17.0504	20.8303	16.7507	13.3407	13.6014	13.4653	13.3939	12.6628	13.4653	0	0
150.1	2.11232	18.0458	14.3776	17.0157	17.8147	18.3634	10.9602	13.2901	11.0913	11.0986	17.0504	20.8298	16.7503	13.3404	13.6011	13.465	13.3935	12.6625	13.465	0	0
150.2	2.12534	18.0458	14.3776	17.0157	17.8147	18.3634	10.9602	13.2901	11.0913	11.0986	17.0504	20.8293	16.7499	13.3401	13.6008	13.4647	13.3932	12.6622	13.4647	0	0
150.3	2.1382	18.0458	14.3776	17.0157	17.8147	18.3634	10.9602	13.2901	11.0913	11.0986	17.0504	20.8289	16.7495	13.3398	13.6005	13.4644	13.3929	12.662	13.4644	0	0
150.4	2.15087	18.0458	14.3776	17.0157	17.8147	18.3634	10.9602	13.2901	11.0913	11.0986	17.0504	20.8284	16.7491	13.3395	13.6002	13.4641	13.3926	12.6617	13.4641	0	0
150.5	2.16333	18.0458	14.3776	17.0157	17.8147	18.3634	10.9602	13.2901	11.0913	11.0986	17.0504	20.8279	16.7487	13.3392	13.5999	13.4638	13.3923	12.6614	13.4638	0	0
150.6	2.17557	18.0458	14.3776	17.0157	17.8147	18.3634	10.9602	13.2901	11.0913	11.0986	17.0504	20.8274	16.7484	13.3389	13.5996	13.4635	13.392	12.6611	13.4635	0	0
150.7	2.18757	18.0458	14.3776	17.0157	17.8147	18.3634	10.9602	13.2901	11.0913	11.0986	17.0504	20.827	16.748	13.3386	13.5993	13.4632	13.3917	12.6608	13.4632	0	0
150.8	2.19931	18.0458	14.3776	17.0157	17.8147	18.3634	10.9602	13.2901	11.0913	11.0986	17.0504	20.8265	16.7476	13.3383	13.599	13.4629	13.3914	12.6605	13.4629	0	0
150.9	2.21078	18.0458	14.3776	17.0157	17.8147	18.3634	10.9602	13.2901	11.0913	11.0986	17.0504	20.826	16.7472	13.338	13.5987	13.4626	13.3911	12.6602	13.4626	0	0
151	2.22196	18.0458	14.3776	17.0157	17.8147	18.3634	10.9602	13.2901	11.0913	11.0986	17.0504	20.8256	16.7469	13.3377	13.5984	13.4623	13.3908	12.66	13.4623	0	0
151.1	2.23285	18.0458	14.3776	17.0157	17.8147	18.3634	10.9602	13.2901	11.0913	11.0986	17.0504	20.8251	16.7465	13.3374	13.5981	13.462	13.3905	12.6597	13.462	0	0
151.2	2.24343	18.0458	14.3776	17.0157	17.8147	18.3634	10.9602	13.2901	11.0913	11.0986	17.0504	20.8246	16.7461	13.3371	13.5978	13.4617	13.3902	12.6594	13.4617	0	0
151.3	2.25369	18.0458	14.3776	17.0157	17.8147	18.3634	10.9602	13.2901	11.0913	11.0986	17.0504	20.8242	16.7458	13.3368	13.5975	13.4614	13.3899	12.6591	13.4614	0	0
151.4	2.26361	18.0458	14.3776	17.0157	17.8147	18.3634	10.9602	13.2901	11.0913	11.0986	17.0504	20.8237	16.7454	13.3365	13.5972	13.4611	13.3896	12.6588	13.4611	0	0
151.5	2.2732	18.0458	14.3776	17.0157	17.8147	18.3634	10.9602	13.2901	11.0913	11.0986	17.0504	20.8233	16.745	13.3362	13.5969	13.4608	13.3893	12.6586	13.4608	0	0
151.6	2.28244	18.0458	14.3776	17.0157	17.8147	18.3634	10.9602	13.2901	11.0913	11.0986	17.0504	20.8228	16.7446	13.336	13.5966	13.4605	13.3891	12.6583	13.4605	0	0
151.7	2.29132	18.0458	14.3776	17.0157	17.8147	18.3634	10.9602	13.2901	11.0913	11.0986	17.0504	20.8223	16.7443	13.3357	13.5963	13.4602	13.3888	12.658	13.4602	0	0
151.8	2.29984	18.0458	14.3776	17.0157	17.8147	18.3634	10.9602	13.2901	11.0913	11.0986	17.0504	20.8219	16.7439	13.3354	13.596	13.4599	13.3885	12.6577	13.4599	0	0
151.9	2.30799	18.0458	14.3776	17.0157	17.8147	18.3634	10.9602	13.2901	11.0913	11.0986	17.0504	20.8214	16.7435	13.3351	13.5957	13.4596	13.3882	12.6574	13.4596	0	0
152	2.31577	18.0458	14.3776	17.0157	17.8147	18.3634	10.9602	13.2901	11.0913	11.0986	17.0504	20.821	16.7432	13.3348	13.5954	13.4593	13.3879	12.6572	13.4593	0	0
152.1	2.32317	18.0458	14.3776	17.0157	17.8147	18.3634	10.9602	13.2901	11.0913	11.0986	17.0504	20.8205	16.7428	13.3345	13.5951	13.459	13.3876	12.6569	13.459	0	0
152.2	2.33018	18.0458	14.3776	17.0157	17.8147	18.3634	10.9602	13.2901	11.0913	11.0986	17.0504	20.8201	16.7425	13.3342	13.5948	13.4587	13.3873	12.6566	13.4587	0	0
152.3	2.33681	18.0458	14.3776	17.0157	17.8147	18.3634	10.9602	13.2901	11.0913	11.0986	17.0504	20.8196	16.7421	13.3339	13.5945	13.4585	13.387	12.6564	13.4585	0	0
152.4	2.34305	18.0458	14.3776	17.0157	17.8147	18.3634	10.9602	13.2901	11.0913	11.0986	17.0504	20.8192	16.7417	13.3336	13.5942	13.4582	13.3867	12.6561	13.4582	0	0
152.5	2.34889	18.0458	14.3776	17.0157	17.8147	18.3634	10.9602	13.2901	11.0913	11.0986	17.0504	20.8187	16.7414	13.3333	13.5939	13.4579	13.3864	12.6558	13.4579	0	0
152.6	2.35434	18.0458	14.3776	17.0157	17.8147	18.3634	10.9602	13.2901	11.0913	11.0986	17.0504	20.8183	16.741	13.3331	13.5936	13.4576	13.3861	12.6555	13.4576	0	0
152.7	2.35939	18.0458	14.3776	17.0157	17.8147	18.3634	10.9602	13.2901	11.0913	11.0986	17.0504	20.8178	16.7407	13.3328	13.5933	13.4573	13.3859	12.6553	13.4573	0	0
152.8	2.36403	18.0458	14.3776	17.0157	17.8147	18.3634	10.9602	13.2901	11.0913	11.0986	17.0504	20.8174	16.7403	13.3325	13.593	13.457	13.3856	12.655	13.457	0	0
152.9	2.36828	18.0458	14.3776	17.0157	17.8147	18.3634	10.9602	13.2901	11.0913	11.0986	17.0504	20.817	16.7399	13.3322	13.5927	13.4567	13.3853	12.6547	13.4567	0	0
153	2.37213	18.0458	14.3776	17.0157	17.8147	18.3634	10.9602	13.2901	11.0913	11.0986	17.0504	20.8165	16.7396	13.3319	13.5925	13.4564	13.385	12.6545	13.4564	0	0
153.1	2.37558	18.0458	14.3776	17.0157	17.8147	18.3634	10.9602	13.2901	11.0913	11.0986	17.0504	20.8161	16.7392	13.3316	13.5922	13.4562	13.3847	12.6542	13.4562	0	0
153.2	2.37862	18.0458	14.3776	17.0157	17.8147	18.3634	10.9602	13.2901	11.0913	11.0986	17.0504	20.8156	16.7389	13.3314	13.5919	13.4559	13.3844	12.6539	13.4559	0	0
153.3	2.38127	18.0458	14.3776	17.0157	17.8147	18.3634	10.9602	13.2901	11.0913	11.0986	17.0504	20.8152	16.7385	13.3311	13.5916	13.4556	13.3842	12.6537	13.4556	0	0
153.4	2.38353	18.0458	14.3776	17.0157	17.8147	18.3634	10.9602	13.2901	11.0913	11.0986	17.0504	20.8148	16.7382	13.3308	13.5913	13.4553	13.3839	12.6534	13.4553	0	0
153.5	2.38538	18.0458	14.3776	17.0157	17.8147	18.3634	10.9602	13.2901	11.0913	11.0986	17.0504	20.8143	16.7378	13.3305	13.591	13.455	13.3836	12.6531	13.455	0	0
153.6	2.38685	18.0458	14.3776	17.0157	17.8147	18.3634	10.9602	13.2901	11.0913	11.0986	17.0504	20.8139	16.7375	13.3302	13.5907	13.4547	13.3833	12.6529	13.4547	0	0
153.7	2.38793	18.0458	14.3776	17.0157	17.8147	18.3634	10.9602	13.2901	11.0913	11.0986	17.0504	20.8134	16.7371	13.33	13.5905	13.4545	13.383	12.6526	13.4545	0	0
153.8	2.38861	18.0458	14.3776	17.0157	17.8147	18.3634	10.9602	13.2901	11.0913	11.0986	17.0504	20.813	16.7368	13.3297	13.5902	13.4542	13.3828	12.6523	13.4542	0	0
153.9	2.38891	18.0458	14.3776	17.0157	17.8147	18.3634	10.9602	13.2901	11.0913	11.0986	17.0504	20.8126	16.7364	13.3294	13.5899	13.4539	13.3825	12.6521	13.4539	0	0
154	2.38883	18.0458	14.3776	17.0157	17.8147	18.3634	10.9602	13.2901	11.0913	11.0986	17.0504	20.8122	16.7361	13.3291	13.5896	13.4536	13.3822	12.6518	13.4536	0	0
154.1	2.38836	18.0458	14.3776	17.0157	17.8147	18.3634	10.9602	13.2901	11.0913	11.0986	17.0504	20.8117	16.7357	13.3289	13.5893	13.4533	13.3819	12.6515	13.4533	0	0
154.2	2.38751	18.0458	14.3776	17.0157	17.8147	18.3634	10.9602	13.2901	11.0913	11.0986	17.0504	20.8113	16.7354	13.3286	13.589	13.4531	13.3816	12.6513	13.4531	0	0
154.3	2.38628	18.0458	14.3776	17.0157	17.8147	18.3634	10.9602	13.2901	11.0913	11.0986	17.0504	20.8109	16.735	13.3283	13.5888	13.4528	13.3814	12.651	13.4528	0	0
154.4	2.38468	18.0458	14.3776	17.0157	17.8147	18.3634	10.9602	13.2901	11.0913	11.0986	17.0504	20.8104	16.7347	13.328	13.5885	13.4525	13.3811	12.6508	13.4525	0	0
154.5	2.38269	18.0458	14.3776	17.0157	17.8147	18.3634	10.9602	13.2901	11.0913	11.0986	17.0504	20.81	16.7344	13.3278	13.5882	13.4522	13.3808	12.6505	13.4522	0	0
154.6	2.38034	18.0458	14.3776	17.0157	17.8147	18.3634	10.9602	13.2901	11.0913	11.0986	17.0504	20.8096	16.734	13.3275	13.5879	13.452	13.3805	12.6502	13.452	0	0
154.7	2.37762	18.0458	14.3776	17.0157	17.8147	18.3634	10.9602	13.2901	11.0913	11.0986	17.0504	20.8092	16.7337	13.3272	13.5877	13.4517	13.3803	12.65	13.4517	0	0
154.8	2.37453	18.0458	14.3776	17.0157	17.8147	18.3634	10.9602	13.2901	11.0913	11.0986	17.0504	20.8087	16.7333	13.3269	13.5874	13.4514	13.38	12.6497	13.4514	0	0
154.9	2.37108	18.0458	14.3776	17.0157	17.8147	18.3634	10.9602	13.2901	11.0913	11.0986	17.0504	20.8083	16.733	13.3267	13.5871	13.4511	13.3797	12.6495	13.4511	0	0
155	2.36727	18.0458	14.3776	17.0157	17.8147	18.3634	10.9602	13.2901	11.0913	11.0986	17.0504	20.8079	16.7327	13.3264	13.5868	13.4509	13.3795	12.6492	13.4509	0	0
155.1	2.36311	18.0458	14.3776	17.0157	17.8147	18.3634	10.9602	13.2901	11.0913	11.0986	17.0504	20.8075	16.7323	13.3261	13.5866	13.4506	13.3792	12.649	13.4506	0	0
155.2	2.35861	18.0458	14.3776	17.0157	17.8147	18.3634	10.9602	13.2901	11.0913	11.0986	17.0504	20.8071	16.732	13.3259	13.5863	13.4503	13.3789	12.6487	13.4503	0	0
155.3	2.35376	18.0458	14.3776	17.0157	17.8147	18.3634	10.9602	13.2901	11.0913	11.0986	17.0504	20.8066	16.7316	13.3256	13.586	13.4501	13.3787	12.6485	13.4501	0	0
155.4	2.34857	18.0458	14.3776	17.0157	17.8147	18.3634	10.9602	13.2901	11.0913	11.0986	17.0504	20.8062	16.7313	13.3253	13.5857	13.4498	13.3784	12.6482	13.4498	0	0
155.5	2.34306	18.0458	14.3776	17.0157	17.8147	18.3634	10.9602	13.2901	11.0913	11.0986	17.0504	20.8058	16.731	13.3251	13.5855	13.4495	13.3781	12.6479	13.4495	0	0
155.6	2.33723	18.0458	14.3776	17.0157	17.8147	18.3634	10.9602	13.2901	11.0913	11.0986	17.0504	20.8054	16.7306	13.3248	13.5852	13.4493	13.3779	12.6477	13.4493	0	0
155.7	2.33108	18.0458	14.3776	17.0157	17.8147	18.3634	10.9602	13.2901	11.0913	11.0986	17.0504	20.805	16.7303	13.3245	13.5849	13.449	13.3776	12.6474	13.449	0	0
155.8	2.32463	18.0458	14.3776	17.0157	17.8147	18.3634	10.9602	13.2901	11.0913	11.0986	17.0504	20.8046	16.73	13.3243	13.5847	13.4487	13.3773	12.6472	13.4487	0	0
155.9	2.31788	18.0458	14.3776	17.0157	17.8147	18.3634	10.9602	13.2901	11.0913	11.0986	17.0504	20.8042	16.7297	13.324	13.5844	13.4485	13.3771	12.6469	13.4485	0	0
156	2.31085	18.0458	14.3776	17.0157	17.8147	18.3634	10.9602	13.2901	11.0913	11.0986	17.0504	20.8037	16.7293	13.3237	13.5841	13.4482	13.3768	12.6467	13.4482	0	0
156.1	2.30355	18.0458	14.3776	17.0157	17.8147	18.3634	10.9602	13.2901	11.0913	11.0986	17.0504	20.8033	16.729	13.3235	13.5839	13.4479	13.3765	12.6464	13.4479	0	0
156.2	2.29599	18.0458	14.3776	17.0157	17.8147	18.3634	10.9602	13.2901	11.0913	11.0986	17.0504	20.8029	16.7287	13.3232	13.5836	13.4477	13.3763	12.6462	13.4477	0	0
156.3	2.28818	18.0458	14.3776	17.0157	17.8147	18.3634	10.9602	13.2901	11.0913	11.0986	17.0504	20.8025	16.7283	13.323	13.5833	13.4474	13.376	12.6459	13.4474	0	0
156.4	2.28014	18.0458	14.3776	17.0157	17.8147	18.3634	10.9602	13.2901	11.0913	11.0986	17.0504	20.8021	16.728	13.3227	13.5831	13.4471	13.3757	12.6457	13.4471	0	0
156.5	2.27188	18.0458	14.3776	17.0157	17.8147	18.3634	10.9602	13.2901	11.0913	11.0986	17.0504	20.8017	16.7277	13.3224	13.5828	13.4469	13.3755	12.6455	13.4469	0	0
156.6	2.26341	18.0458	14.3776	17.0157	17.8147	18.3634	10.9602	13.2901	11.0913	11.0986	17.0504	20.8013	16.7274	13.3222	13.5825	13.4466	13.3752	12.6452	13.4466	0	0
156.7	2.25475	18.0458	14.3776	17.0157	17.8147	18.3634	10.9602	13.2901	11.0913	11.0986	17.0504	20.8009	16.727	13.3219	13.5823	13.4463	13.375	12.645	13.4463	0	0
156.8	2.24591	18.0458	14.3776	17.0157	17.8147	18.3634	10.9602	13.2901	11.0913	11.0986	17.0504	20.8005	16.7267	13.3217	13.582	13.4461	13.3747	12.6447	13.4461	0	0
156.9	2.2369	18.0458	14.3776	17.0157	17.8147	18.3634	10.9602	13.2901	11.0913	11.0986	17.0504	20.8001	16.7264	13.3214	13.5817	13.4458	13.3745	12.6445	13.4458	0	0
157	2.22774	18.0458	14.3776	17.0157	17.8147	18.3634	10.9602	13.2901	11.0913	11.0986	17.0504	20.7997	16.7261	13.3212	13.5815	13.4456	13.3742	12.6442	13.4456	0	0
157.1	2.21844	18.0458	14.3776	17.0157	17.8147	18.3634	10.9602	13.2901	11.0913	11.0986	17.0504	20.7993	16.7257	13.3209	13.5812	13.4453	13.3739	12.644	13.4453	0	0
157.2	2.209	18.0458	14.3776	17.0157	17.8147	18.3634	10.9602	13.2901	11.0913	11.0986	17.0504	20.7989	16.7254	13.3206	13.581	13.4451	13.3737	12.6437	13.4451	0	0
157.3	2.19944	18.0458	14.3776	17.0157	17.8147	18.3634	10.9602	13.2901	11.0913	11.0986	17.0504	20.7985	16.7251	13.3204	13.5807	13.4448	13.3734	12.6435	13.4448	0	0
157.4	2.18976	18.0458	14.3776	17.0157	17.8147	18.3634	10.9602	13.2901	11.0913	11.0986	17.0504	20.7981	16.7248	13.3201	13.5804	13.4445	13.3732	12.6433	13.4445	0	0
157.5	2.17999	18.0458	14.3776	17.0157	17.8147	18.3634	10.9602	13.2901	11.0913	11.0986	17.0504	20.7977	16.7245	13.3199	13.5802	13.4443	13.3729	12.643	13.4443	0	0
157.6	2.17013	18.0458	14.3776	17.0157	17.8147	18.3634	10.9602	13.2901	11.0913	11.0986	17.0504	20.7973	16.7242	13.3196	13.5799	13.444	13.3727	12.6428	13.444	0	0
157.7	2.16018	18.0458	14.3776	17.0157	17.8147	18.3634	10.9602	13.2901	11.0913	11.0986	17.0504	20.7969	16.7238	13.3194	13.5797	13.4438	13.3724	12.6425	13.4438	0	0
157.8	2.15016	18.0458	14.3776	17.0157	17.8147	18.3634	10.9602	13.2901	11.0913	11.0986	17.0504	20.7965	16.7235	13.3191	13.5794	13.4435	13.3722	12.6423	13.4435	0	0
157.9	2.14008	18.0458	14.3776	17.0157	17.8147	18.3634	10.9602	13.2901	11.0913	11.0986	17.0504	20.7961	16.7232	13.3189	13.5792	13.4433	13.3719	12.6421	13.4433	0	0
158	2.12996	18.0458	14.3776	17.0157	17.8147	18.3634	10.9602	13.2901	11.0913	11.0986	17.0504	20.7958	16.7229	13.3186	13.5789	13.443	13.3717	12.6418	13.443	0	0
158.1	2.11979	18.0458	14.3776	17.0157	17.8147	18.3634	10.9602	13.2901	11.0913	11.0986	17.0504	20.7954	16.7226	13.3184	13.5786	13.4428	13.3714	12.6416	13.4428	0	0
158.2	2.10959	18.0458	14.3776	17.0157	17.8147	18.3634	10.9602	13.2901	11.0913	11.0986	17.0504	20.795	16.7223	13.3181	13.5784	13.4425	13.3712	12.6414	13.4425	0	0
158.3	2.09938	18.0458	14.3776	17.0157	17.8147	18.3634	10.9602	13.2901	11.0913	11.0986	17.0504	20.7946	16.722	13.3179	13.5781	13.4423	13.3709	12.6411	13.4423	0	0
158.4	2.08916	18.0458	14.3776	17.0157	17.8147	18.3634	10.9602	13.2901	11.0913	11.0986	17.0504	20.7942	16.7216	13.3176	13.5779	13.442	13.3707	12.6409	13.442	0	0
158.5	2.07895	18.0458	14.3776	17.0157	17.8147	18.3634	10.9602	13.2901	11.0913	11.0986	17.0504	20.7938	16.7213	13.3174	13.5776	13.4418	13.3704	12.6407	13.4418	0	0
158.6	2.06875	18.0458	14.3776	17.0157	17.8147	18.3634	10.9602	13.2901	11.0913	11.0986	17.0504	20.7934	16.721	13.3171	13.5774	13.4415	13.3702	12.6404	13.4415	0	0
158.7	2.05859	18.0458	14.3776	17.0157	17.8147	18.3634	10.9602	13.2901	11.0913	11.0986	17.0504	20.793	16.7207	13.3169	13.5771	13.4413	13.3699	12.6402	13.4413	0	0
158.8	2.04846	18.0458	14.3776	17.0157	17.8147	18.3634	10.9602	13.2901	11.0913	11.0986	17.0504	20.7927	16.7204	13.3167	13.5769	13.441	13.3697	12.64	13.441	0	0
158.9	2.03839	18.0458	14.3776	17.0157	17.8147	18.3634	10.9602	13.2901	11.0913	11.0986	17.0504	20.7923	16.7201	13.3164	13.5766	13.4408	13.3694	12.6397	13.4408	0	0
159	2.02838	18.0458	14.3776	17.0157	17.8147	18.3634	10.9602	13.2901	11.0913	11.0986	17.0504	20.7919	16.7198	13.3162	13.5764	13.4405	13.3692	12.6395	13.4405	0	0
159.1	2.01845	18.0458	14.3776	17.0157	17.8147	18.3634	10.9602	13.2901	11.0913	11.0986	17.0504	20.7915	16.7195	13.3159	13.5761	13.4403	13.3689	12.6393	13.4403	0	0
159.2	2.0086	18.0458	14.3776	17.0157	17.8147	18.3634	10.9602	13.2901	11.0913	11.0986	17.0504	20.7911	16.7192	13.3157	13.5759	13.44	13.3687	12.639	13.44	0	0
159.3	1.99884	18.0458	14.3776	17.0157	17.8147	18.3634	10.9602	13.2901	11.0913	11.0986	17.0504	20.7908	16.7189	13.3154	13.5756	13.4398	13.3684	12.6388	13.4398	0	0
159.4	1.98919	18.0458	14.3776	17.0157	17.8147	18.3634	10.9602	13.2901	11.0913	11.0986	17.0504	20.7904	16.7186	13.3152	13.5754	13.4396	13.3682	12.6386	13.4396	0	0
159.5	1.97964	18.0458	14.3776	17.0157	17.8147	18.3634	10.9602	13.2901	11.0913	11.0986	17.0504	20.79	16.7183	13.315	13.5752	13.4393	13.368	12.6383	13.4393	0	0
159.6	1.97022	18.0458	14.3776	17.0157	17.8147	18.3634	10.9602	13.2901	11.0913	11.0986	17.0504	20.7896	16.718	13.3147	13.5749	13.4391	13.3677	12.6381	13.4391	0	0
159.7	1.96093	18.0458	14.3776	17.0157	17.8147	18.3634	10.9602	13.2901	11.0913	11.0986	17.0504	20.7893	16.7177	13.3145	13.5747	13.4388	13.3675	12.6379	13.4388	0	0
159.8	1.95177	18.0458	14.3776	17.0157	17.8147	18.3634	10.9602	13.2901	11.0913	11.0986	17.0504	20.7889	16.7174	13.3142	13.5744	13.4386	13.3672	12.6377	13.4386	0	0
159.9	1.94276	18.0458	14.3776	17.0157	17.8147	18.3634	10.9602	13.2901	11.0913	11.0986	17.0504	20.7885	16.7171	13.314	13.5742	13.4383	13.367	12.6374	13.4383	0	0
160	1.9339	18.0458	14.3776	17.0157	17.8147	18.3634	10.9602	13.2901	11.0913	11.0986	17.0504	20.7881	16.7168	13.3138	13.5739	13.4381	13.3668	12.6372	13.4381	0	0
160.1	1.9252	18.0458	14.3776	17.0157	17.8147	18.3634	10.9602	13.2901	11.0913	11.0986	17.0504	20.7878	16.7165	13.3135	13.5737	13.4379	13.3665	12.637	13.4379	0	0
160.2	1.91667	18.0458	14.3776	17.0157	17.8147	18.3634	10.9602	13.2901	11.0913	11.0986	17.0504	20.7874	16.7162	13.3133	13.5734	13.4376	13.3663	12.6368	13.4376	0	0
160.3	1.90832	18.0458	14.3776	17.0157	17.8147	18.3634	10.9602	13.2901	11.0913	11.0986	17.0504	20.787	16.7159	13.313	13.5732	13.4374	13.3661	12.6365	13.4374	0	0
160.4	1.90015	18.0458	14.3776	17.0157	17.8147	18.3634	10.9602	13.2901	11.0913	11.0986	17.0504	20.7867	16.7156	13.3128	13.573	13.4371	13.3658	12.6363	13.4371	0	0
160.5	1.89216	18.0458	14.3776	17.0157	17.8147	18.3634	10.9602	13.2901	11.0913	11.0986	17.0504	20.7863	16.7153	13.3126	13.5727	13.4369	13.3656	12.6361	13.4369	0	0
160.6	1.88437	18.0458	14.3776	17.0157	17.8147	18.3634	10.9602	13.2901	11.0913	11.0986	17.0504	20.7859	16.715	13.3123	13.5725	13.4367	13.3653	12.6359	13.4367	0	0
160.7	1.87678	18.0458	14.3776	17.0157	17.8147	18.3634	10.9602	13.2901	11.0913	11.0986	17.0504	20.7856	16.7147	13.3121	13.5723	13.4364	13.3651	12.6356	13.4364	0	0
160.8	1.86939	18.0458	14.3776	17.0157	17.8147	18.3634	10.9602	13.2901	11.0913	11.0986	17.0504	20.7852	16.7144	13.3119	13.572	13.4362	13.3649	12.6354	13.4362	0	0
160.9	1.8622	18.0458	14.3776	17.0157	17.8147	18.3634	10.9602	13.2901	11.0913	11.0986	17.0504	20.7848	16.7141	13.3116	13.5718	13.436	13.3646	12.6352	13.436	0	0
161	1.85522	18.0458	14.3776	17.0157	17.8147	18.3634	10.9602	13.2901	11.0913	11.0986	17.0504	20.7845	16.7138	13.3114	13.5715	13.4357	13.3644	12.635	13.4357	0	0
161.1	1.84846	18.0458	14.3776	17.0157	17.8147	18.3634	10.9602	13.2901	11.0913	11.0986	17.0504	20.7841	16.7135	13.3112	13.5713	13.4355	13.3642	12.6348	13.4355	0	0
161.2	1.84191	18.0458	14.3776	17.0157	17.8147	18.3634	10.9602	13.2901	11.0913	11.0986	17.0504	20.7838	16.7133	13.311	13.5711	13.4353	13.3639	12.6345	13.4353	0	0
161.3	1.83558	18.0458	14.3776	17.0157	17.8147	18.3634	10.9602	13.2901	11.0913	11.0986	17.0504	20.7834	16.713	13.3107	13.5708	13.435	13.3637	12.6343	13.435	0	0
161.4	1.82947	18.0458	14.3776	17.0157	17.8147	18.3634	10.9602	13.2901	11.0913	11.0986	17.0504	20.783	16.7127	13.3105	13.5706	13.4348	13.3635	12.6341	13.4348	0	0
161.5	1.82358	18.0458	14.3776	17.0157	17.8147	18.3634	10.9602	13.2901	11.0913	11.0986	17.0504	20.7827	16.7124	13.3103	13.5704	13.4346	13.3633	12.6339	13.4346	0	0
161.6	1.81792	18.0458	14.3776	17.0157	17.8147	18.3634	10.9602	13.2901	11.0913	11.0986	17.0504	20.7823	16.7121	13.31	13.5701	13.4343	13.363	12.6337	13.4343	0	0
161.7	1.81248	18.0458	14.3776	17.0157	17.8147	18.3634	10.9602	13.2901	11.0913	11.0986	17.0504	20.782	16.7118	13.3098	13.5699	13.4341	13.3628	12.6335	13.4341	0	0
161.8	1.80726	18.0458	14.3776	17.0157	17.8147	18.3634	10.9602	13.2901	11.0913	11.0986	17.0504	20.7816	16.7115	13.3096	13.5697	13.4339	13.3626	12.6332	13.4339	0	0
161.9	1.80227	18.0458	14.3776	17.0157	17.8147	18.3634	10.9602	13.2901	11.0913	11.0986	17.0504	20.7813	16.7112	13.3094	13.5694	13.4337	13.3623	12.633	13.4337	0	0
162	1.79751	18.0458	14.3776	17.0157	17.8147	18.3634	10.9602	13.2901	11.0913	11.0986	17.0504	20.7809	16.711	13.3091	13.5692	13.4334	13.3621	12.6328	13.4334	0	0
162.1	1.79296	18.0458	14.3776	17.0157	17.8147	18.3634	10.9602	13.2901	11.0913	11.0986	17.0504	20.7806	16.7107	13.3089	13.569	13.4332	13.3619	12.6326	13.4332	0	0
162.2	1.78864	18.0458	14.3776	17.0157	17.8147	18.3634	10.9602	13.2901	11.0913	11.0986	17.0504	20.7802	16.7104	13.3087	13.5688	13.433	13.3617	12.6324	13.433	0	0
162.3	1.78454	18.0458	14.3776	17.0157	17.8147	18.3634	10.9602	13.2901	11.0913	11.0986	17.0504	20.7799	16.7101	13.3085	13.5685	13.4327	13.3614	12.6322	13.4327	0	0
162.4	1.78065	18.0458	14.3776	17.0157	17.8147	18.3634	10.9602	13.2901	11.0913	11.0986	17.0504	20.7795	16.7098	13.3082	13.5683	13.4325	13.3612	12.632	13.4325	0	0
162.5	1.77698	18.0458	14.3776	17.0157	17.8147	18.3634	10.9602	13.2901	11.0913	11.0986	17.0504	20.7792	16.7096	13.308	13.5681	13.4323	13.361	12.6317	13.4323	0	0
162.6	1.77352	18.0458	14.3776	17.0157	17.8147	18.3634	10.9602	13.2901	11.0913	11.0986	17.0504	20.7788	16.7093	13.3078	13.5678	13.4321	13.3608	12.6315	13.4321	0	0
162.7	1.77026	18.0458	14.3776	17.0157	17.8147	18.3634	10.9602	13.2901	11.0913	11.0986	17.0504	20.7785	16.709	13.3076	13.5676	13.4318	13.3605	12.6313	13.4318	0	0
162.8	1.76721	18.0458	14.3776	17.0157	17.8147	18.3634	10.9602	13.2901	11.0913	11.0986	17.0504	20.7781	16.7087	13.3073	13.5674	13.4316	13.3603	12.6311	13.4316	0	0
162.9	1.76436	18.0458	14.3776	17.0157	17.8147	18.3634	10.9602	13.2901	11.0913	11.0986	17.0504	20.7778	16.7084	13.3071	13.5672	13.4314	13.3601	12.6309	13.4314	0	0
163	1.76171	18.0458	14.3776	17.0157	17.8147	18.3634	10.9602	13.2901	11.0913	11.0986	17.0504	20.7774	16.7082	13.3069	13.5669	13.4312	13.3599	12.6307	13.4312	0	0
163.1	1.75924	18.0458	14.3776	17.0157	17.8147	18.3634	10.9602	13.2901	11.0913	11.0986	17.0504	20.7771	16.7079	13.3067	13.5667	13.431	13.3597	12.6305	13.431	0	0
163.2	1.75695	18.0458	14.3776	17.0157	17.8147	18.3634	10.9602	13.2901	11.0913	11.0986	17.0504	20.7767	16.7076	13.3065	13.5665	13.4307	13.3594	12.6303	13.4307	0	0
163.3	1.75483	18.0458	14.3776	17.0157	17.8147	18.3634	10.9602	13.2901	11.0913	11.0986	17.0504	20.7764	16.7073	13.3062	13.5663	13.4305	13.3592	12.6301	13.4305	0	0
163.4	1.75287	18.0458	14.3776	17.0157	17.8147	18.3634	10.9602	13.2901	11.0913	11.0986	17.0504	20.7761	16.7071	13.306	13.566	13.4303	13.359	12.6299	13.4303	0	0
163.5	1.75107	18.0458	14.3776	17.0157	17.8147	18.3634	10.9602	13.2901	11.0913	11.0986	17.0504	20.7757	16.7068	13.3058	13.5658	13.4301	13.3588	12.6297	13.4301	0	0
163.6	1.74942	18.0458	14.3776	17.0157	17.8147	18.3634	10.9602	13.2901	11.0913	11.0986	17.0504	20.7754	16.7065	13.3056	13.5656	13.4299	13.3586	12.6295	13.4299	0	0
163.7	1.74789	18.0458	14.3776	17.0157	17.8147	18.3634	10.9602	13.2901	11.0913	11.0986	17.0504	20.775	16.7062	13.3054	13.5654	13.4296	13.3583	12.6292	13.4296	0	0
163.8	1.7465	18.0458	14.3776	17.0157	17.8147	18.3634	10.9602	13.2901	11.0913	11.0986	17.0504	20.7747	16.706	13.3051	13.5652	13.4294	13.3581	12.629	13.4294	0	0
163.9	1.74521	18.0458	14.3776	17.0157	17.8147	18.3634	10.9602	13.2901	11.0913	11.0986	17.0504	20.7744	16.7057	13.3049	13.5649	13.4292	13.3579	12.6288	13.4292	0	0
164	1.74403	18.0458	14.3776	17.0157	17.8147	18.3634	10.9602	13.2901	11.0913	11.0986	17.0504	20.774	16.7054	13.3047	13.5647	13.429	13.3577	12.6286	13.429	0	0
164.1	1.74293	18.0458	14.3776	17.0157	17.8147	18.3634	10.9602	13.2901	11.0913	11.0986	17.0504	20.7737	16.7052	13.3045	13.5645	13.4288	13.3575	12.6284	13.4288	0	0
164.2	1.74191	18.0458	14.3776	17.0157	17.8147	18.3634	10.9602	13.2901	11.0913	11.0986	17.0504	20.7734	16.7049	13.3043	13.5643	13.4285	13.3573	12.6282	13.4285	0	0
164.3	1.74096	18.0458	14.3776	17.0157	17.8147	18.3634	10.9602	13.2901	11.0913	11.0986	17.0504	20.773	16.7046	13.3041	13.5641	13.4283	13.357	12.628	13.4283	0	0
164.4	1.74006	18.0458	14.3776	17.0157	17.8147	18.3634	10.9602	13.2901	11.0913	11.0986	17.0504	20.7727	16.7044	13.3039	13.5638	13.4281	13.3568	12.6278	13.4281	0	0
164.5	1.7392	18.0458	14.3776	17.0157	17.8147	18.3634	10.9602	13.2901	11.0913	11.0986	17.0504	20.7724	16.7041	13.3037	13.5636	13.4279	13.3566	12.6276	13.4279	0	0
164.6	1.73836	18.0458	14.3776	17.0157	17.8147	18.3634	10.9602	13.2901	11.0913	11.0986	17.0504	20.772	16.7038	13.3034	13.5634	13.4277	13.3564	12.6274	13.4277	0	0
164.7	1.73754	18.0458	14.3776	17.0157	17.8147	18.3634	10.9602	13.2901	11.0913	11.0986	17.0504	20.7717	16.7036	13.3032	13.5632	13.4275	13.3562	12.6272	13.4275	0	0
164.8	1.73671	18.0458	14.3776	17.0157	17.8147	18.3634	10.9602	13.2901	11.0913	11.0986	17.0504	20.7714	16.7033	13.303	13.563	13.4273	13.356	12.627	13.4273	0	0
164.9	1.73586	18.0458	14.3776	17.0157	17.8147	18.3634	10.9602	13.2901	11.0913	11.0986	17.0504	20.771	16.703	13.3028	13.5628	13.427	13.3558	12.6268	13.427	0	0
165	1.73498	18.0458	14.3776	17.0157	17.8147	18.3634	10.9602	13.2901	11.0913	11.0986	17.0504	20.7707	16.7028	13.3026	13.5626	13.4268	13.3556	12.6266	13.4268	0	0
165.1	1.73405	18.0458	14.3776	17.0157	17.8147	18.3634	10.9602	13.2901	11.0913	11.0986	17.0504	20.7704	16.7025	13.3024	13.5623	13.4266	13.3553	12.6264	13.4266	0	0
165.2	1.73306	18.0458	14.3776	17.0157	17.8147	18.3634	10.9602	13.2901	11.0913	11.0986	17.0504	20.7701	16.7022	13.3022	13.5621	13.4264	13.3551	12.6262	13.4264	0	0
165.3	1.732	18.0458	14.3776	17.0157	17.8147	18.3634	10.9602	13.2901	11.0913	11.0986	17.0504	20.7697	16.702	13.302	13.5619	13.4262	13.3549	12.626	13.4262	0	0
165.4	1.73085	18.0458	14.3776	17.0157	17.8147	18.3634	10.9602	13.2901	11.0913	11.0986	17.0504	20.7694	16.7017	13.3018	13.5617	13.426	13.3547	12.6258	13.426	0	0
165.5	1.72959	18.0458	14.3776	17.0157	17.8147	18.3634	10.9602	13.2901	11.0913	11.0986	17.0504	20.7691	16.7015	13.3016	13.5615	13.4258	13.3545	12.6256	13.4258	0	0
165.6	1.72822	18.0458	14.3776	17.0157	17.8147	18.3634	10.9602	13.2901	11.0913	11.0986	17.0504	20.7688	16.7012	13.3013	13.5613	13.4256	13.3543	12.6254	13.4256	0	0
165.7	1.72671	18.0458	14.3776	17.0157	17.8147	18.3634	10.9602	13.2901	11.0913	11.0986	17.0504	20.7685	16.7009	13.3011	13.5611	13.4254	13.3541	12.6252	13.4254	0	0
165.8	1.72507	18.0458	14.3776	17.0157	17.8147	18.3634	10.9602	13.2901	11.0913	11.0986	17.0504	20.7681	16.7007	13.3009	13.5609	13.4252	13.3539	12.625	13.4252	0	0
165.9	1.72327	18.0458	14.3776	17.0157	17.8147	18.3634	10.9602	13.2901	11.0913	11.0986	17.0504	20.7678	16.7004	13.3007	13.5607	13.425	13.3537	12.6248	13.425	0	0
166	1.72131	18.0458	14.3776	17.0157	17.8147	18.3634	10.9602	13.2901	11.0913	11.0986	17.0504	20.7675	16.7002	13.3005	13.5604	13.4247	13.3535	12.6247	13.4247	0	0
166.1	1.71917	18.0458	14.3776	17.0157	17.8147	18.3634	10.9602	13.2901	11.0913	11.0986	17.0504	20.7672	16.6999	13.3003	13.5602	13.4245	13.3533	12.6245	13.4245	0	0
166.2	1.71685	18.0458	14.3776	17.0157	17.8147	18.3634	10.9602	13.2901	11.0913	11.0986	17.0504	20.7669	16.6997	13.3001	13.56	13.4243	13.3531	12.6243	13.4243	0	0
166.3	1.71433	18.0458	14.3776	17.0157	17.8147	18.3634	10.9602	13.2901	11.0913	11.0986	17.0504	20.7665	16.6994	13.2999	13.5598	13.4241	13.3529	12.6241	13.4241	0	0
166.4	1.71162	18.0458	14.3776	17.0157	17.8147	18.3634	10.9602	13.2901	11.0913	11.0986	17.0504	20.7662	16.6991	13.2997	13.5596	13.4239	13.3527	12.6239	13.4239	0	0
166.5	1.7087	18.0458	14.3776	17.0157	17.8147	18.3634	10.9602	13.2901	11.0913	11.0986	17.0504	20.7659	16.6989	13.2995	13.5594	13.4237	13.3525	12.6237	13.4237	0	0
166.6	1.70556	18.0458	14.3776	17.0157	17.8147	18.3634	10.9602	13.2901	11.0913	11.0986	17.0504	20.7656	16.6986	13.2993	13.5592	13.4235	13.3523	12.6235	13.4235	0	0
166.7	1.70221	18.0458	14.3776	17.0157	17.8147	18.3634	10.9602	13.2901	11.0913	11.0986	17.0504	20.7653	16.6984	13.2991	13.559	13.4233	13.3521	12.6233	13.4233	0	0
166.8	1.69864	18.0458	14.3776	17.0157	17.8147	18.3634	10.9602	13.2901	11.0913	11.0986	17.0504	20.765	16.6981	13.2989	13.5588	13.4231	13.3519	12.6231	13.4231	0	0
166.9	1.69483	18.0458	14.3776	17.0157	17.8147	18.3634	10.9602	13.2901	11.0913	11.0986	17.0504	20.7646	16.6979	13.2987	13.5586	13.4229	13.3517	12.6229	13.4229	0	0
167	1.6908	18.0458	14.3776	17.0157	17.8147	18.3634	10.9602	13.2901	11.0913	11.0986	17.0504	20.7643	16.6976	13.2985	13.5584	13.4227	13.3515	12.6227	13.4227	0	0
167.1	1.68654	18.0458	14.3776	17.0157	17.8147	18.3634	10.9602	13.2901	11.0913	11.0986	17.0504	20.764	16.6974	13.2983	13.5582	13.4225	13.3513	12.6225	13.4225	0	0
167.2	1.68204	18.0458	14.3776	17.0157	17.8147	18.3634	10.9602	13.2901	11.0913	11.0986	17.0504	20.7637	16.6971	13.2981	13.558	13.4223	13.3511	12.6224	13.4223	0	0
167.3	1.6773	18.0458	14.3776	17.0157	17.8147	18.3634	10.9602	13.2901	11.0913	11.0986	17.0504	20.7634	16.6969	13.2979	13.5578	13.4221	13.3509	12.6222	13.4221	0	0
167.4	1.67233	18.0458	14.3776	17.0157	17.8147	18.3634	10.9602	13.2901	11.0913	11.0986	17.0504	20.7631	16.6966	13.2977	13.5576	13.4219	13.3507	12.622	13.4219	0	0
167.5	1.66712	18.0458	14.3776	17.0157	17.8147	18.3634	10.9602	13.2901	11.0913	11.0986	17.0504	20.7628	16.6964	13.2975	13.5574	13.4217	13.3505	12.6218	13.4217	0	0
167.6	1.66169	18.0458	14.3776	17.0157	17.8147	18.3634	10.9602	13.2901	11.0913	11.0986	17.0504	20.7625	16.6961	13.2973	13.5572	13.4215	13.3503	12.6216	13.4215	0	0
167.7	1.65602	18.0458	14.3776	17.0157	17.8147	18.3634	10.9602	13.2901	11.0913	11.0986	17.0504	20.7622	16.6959	13.2971	13.557	13.4213	13.3501	12.6214	13.4213	0	0
167.8	1.65013	18.0458	14.3776	17.0157	17.8147	18.3634	10.9602	13.2901	11.0913	11.0986	17.0504	20.7619	16.6956	13.2969	13.5568	13.4211	13.3499	12.6212	13.4211	0	0
167.9	1.64402	18.0458	14.3776	17.0157	17.8147	18.3634	10.9602	13.2901	11.0913	11.0986	17.0504	20.7616	16.6954	13.2967	13.5566	13.4209	13.3497	12.6211	13.4209	0	0
168	1.6377	18.0458	14.3776	17.0157	17.8147	18.3634	10.9602	13.2901	11.0913	11.0986	17.0504	20.7613	16.6952	13.2965	13.5564	13.4207	13.3495	12.6209	13.4207	0	0
168.1	1.63117	18.0458	14.3776	17.0157	17.8147	18.3634	10.9602	13.2901	11.0913	11.0986	17.0504	20.761	16.6949	13.2963	13.5562	13.4205	13.3493	12.6207	13.4205	0	0
168.2	1.62446	18.0458	14.3776	17.0157	17.8147	18.3634	10.9602	13.2901	11.0913	11.0986	17.0504	20.7607	16.6947	13.2962	13.556	13.4203	13.3491	12.6205	13.4203	0	0
168.3	1.61756	18.0458	14.3776	17.0157	17.8147	18.3634	10.9602	13.2901	11.0913	11.0986	17.0504	20.7604	16.6944	13.296	13.5558	13.4201	13.3489	12.6203	13.4201	0	0
168.4	1.61049	18.0458	14.3776	17.0157	17.8147	18.3634	10.9602	13.2901	11.0913	11.0986	17.0504	20.7601	16.6942	13.2958	13.5556	13.4199	13.3487	12.6201	13.4199	0	0
168.5	1.60327	18.0458	14.3776	17.0157	17.8147	18.3634	10.9602	13.2901	11.0913	11.0986	17.0504	20.7598	16.6939	13.2956	13.5554	13.4197	13.3485	12.62	13.4197	0	0
168.6	1.5959	18.0458	14.3776	17.0157	17.8147	18.3634	10.9602	13.2901	11.0913	11.0986	17.0504	20.7595	16.6937	13.2954	13.5552	13.4196	13.3483	12.6198	13.4196	0	0
168.7	1.58841	18.0458	14.3776	17.0157	17.8147	18.3634	10.9602	13.2901	11.0913	11.0986	17.0504	20.7592	16.6935	13.2952	13.555	13.4194	13.3481	12.6196	13.4194	0	0
168.8	1.58081	18.0458	14.3776	17.0157	17.8147	18.3634	10.9602	13.2901	11.0913	11.0986	17.0504	20.7589	16.6932	13.295	13.5548	13.4192	13.3479	12.6194	13.4192	0	0
168.9	1.57312	18.0458	14.3776	17.0157	17.8147	18.3634	10.9602	13.2901	11.0913	11.0986	17.0504	20.7586	16.693	13.2948	13.5546	13.419	13.3477	12.6192	13.419	0	0
169	1.56536	18.0458	14.3776	17.0157	17.8147	18.3634	10.9602	13.2901	11.0913	11.0986	17.0504	20.7583	16.6927	13.2946	13.5544	13.4188	13.3476	12.619	13.4188	0	0
169.1	1.55754	18.0458	14.3776	17.0157	17.8147	18.3634	10.9602	13.2901	11.0913	11.0986	17.0504	20.758	16.6925	13.2944	13.5542	13.4186	13.3474	12.6189	13.4186	0	0
169.2	1.54969	18.0458	14.3776	17.0157	17.8147	18.3634	10.9602	13.2901	11.0913	11.0986	17.0504	20.7577	16.6923	13.2942	13.554	13.4184	13.3472	12.6187	13.4184	0	0
169.3	1.54182	18.0458	14.3776	17.0157	17.8147	18.3634	10.9602	13.2901	11.0913	11.0986	17.0504	20.7574	16.692	13.2941	13.5538	13.4182	13.347	12.6185	13.4182	0	0
169.4	1.53396	18.0458	14.3776	17.0157	17.8147	18.3634	10.9602	13.2901	11.0913	11.0986	17.0504	20.7571	16.6918	13.2939	13.5537	13.418	13.3468	12.6183	13.418	0	0
169.5	1.52611	18.0458	14.3776	17.0157	17.8147	18.3634	10.9602	13.2901	11.0913	11.0986	17.0504	20.7568	16.6916	13.2937	13.5535	13.4178	13.3466	12.6182	13.4178	0	0
169.6	1.51831	18.0458	14.3776	17.0157	17.8147	18.3634	10.9602	13.2901	11.0913	11.0986	17.0504	20.7565	16.6913	13.2935	13.5533	13.4176	13.3464	12.618	13.4176	0	0
169.7	1.51057	18.0458	14.3776	17.0157	17.8147	18.3634	10.9602	13.2901	11.0913	11.0986	17.0504	20.7562	16.6911	13.2933	13.5531	13.4175	13.3462	12.6178	13.4175	0	0
169.8	1.5029	18.0458	14.3776	17.0157	17.8147	18.3634	10.9602	13.2901	11.0913	11.0986	17.0504	20.7559	16.6909	13.2931	13.5529	13.4173	13.346	12.6176	13.4173	0	0
169.9	1.49534	18.0458	14.3776	17.0157	17.8147	18.3634	10.9602	13.2901	11.0913	11.0986	17.0504	20.7556	16.6906	13.2929	13.5527	13.4171	13.3459	12.6174	13.4171	0	0
170	1.4879	18.0458	14.3776	17.0157	17.8147	18.3634	10.9602	13.2901	11.0913	11.0986	17.0504	20.7553	16.6904	13.2927	13.5525	13.4169	13.3457	12.6173	13.4169	0	0
170.1	1.48059	18.0458	14.3776	17.0157	17.8147	18.3634	10.9602	13.2901	11.0913	11.0986	17.0504	20.7551	16.6902	13.2926	13.5523	13.4167	13.3455	12.6171	13.4167	0	0
170.2	1.47345	18.0458	14.3776	17.0157	17.8147	18.3634	10.9602	13.2901	11.0913	11.0986	17.0504	20.7548	16.6899	13.2924	13.5521	13.4165	13.3453	12.6169	13.4165	0	0
170.3	1.46648	18.0458	14.3776	17.0157	17.8147	18.3634	10.9602	13.2901	11.0913	11.0986	17.0504	20.7545	16.6897	13.2922	13.5519	13.4163	13.3451	12.6167	13.4163	0	0
170.4	1.45971	18.0458	14.3776	17.0157	17.8147	18.3634	10.9602	13.2901	11.0913	11.0986	17.0504	20.7542	16.6895	13.292	13.5518	13.4162	13.3449	12.6166	13.4162	0	0
170.5	1.45316	18.0458	14.3776	17.0157	17.8147	18.3634	10.9602	13.2901	11.0913	11.0986	17.0504	20.7539	16.6892	13.2918	13.5516	13.416	13.3447	12.6164	13.416	0	0
170.6	1.44684	18.0458	14.3776	17.0157	17.8147	18.3634	10.9602	13.2901	11.0913	11.0986	17.0504	20.7536	16.689	13.2916	13.5514	13.4158	13.3446	12.6162	13.4158	0	0
170.7	1.44079	18.0458	14.3776	17.0157	17.8147	18.3634	10.9602	13.2901	11.0913	11.0986	17.0504	20.7533	16.6888	13.2915	13.5512	13.4156	13.3444	12.6161	13.4156	0	0
170.8	1.43501	18.0458	14.3776	17.0157	17.8147	18.3634	10.9602	13.2901	11.0913	11.0986	17.0504	20.7531	16.6886	13.2913	13.551	13.4154	13.3442	12.6159	13.4154	0	0
170.9	1.42953	18.0458	14.3776	17.0157	17.8147	18.3634	10.9602	13.2901	11.0913	11.0986	17.0504	20.7528	16.6883	13.2911	13.5508	13.4152	13.344	12.6157	13.4152	0	0
171	1.42436	18.0458	14.3776	17.0157	17.8147	18.3634	10.9602	13.2901	11.0913	11.0986	17.0504	20.7525	16.6881	13.2909	13.5506	13.4151	13.3438	12.6155	13.4151	0	0
171.1	1.41953	18.0458	14.3776	17.0157	17.8147	18.3634	10.9602	13.2901	11.0913	11.0986	17.0504	20.7522	16.6879	13.2907	13.5505	13.4149	13.3437	12.6154	13.4149	0	0
171.2	1.41505	18.0458	14.3776	17.0157	17.8147	18.3634	10.9602	13.2901	11.0913	11.0986	17.0504	20.7519	16.6877	13.2906	13.5503	13.4147	13.3435	12.6152	13.4147	0	0
171.3	1.41094	18.0458	14.3776	17.0157	17.8147	18.3634	10.9602	13.2901	11.0913	11.0986	17.0504	20.7516	16.6874	13.2904	13.5501	13.4145	13.3433	12.615	13.4145	0	0
171.4	1.40723	18.0458	14.3776	17.0157	17.8147	18.3634	10.9602	13.2901	11.0913	11.0986	17.0504	20.7514	16.6872	13.2902	13.5499	13.4143	13.3431	12.6149	13.4143	0	0
171.5	1.40393	18.0458	14.3776	17.0157	17.8147	18.3634	10.9602	13.2901	11.0913	11.0986	17.0504	20.7511	16.687	13.29	13.5497	13.4141	13.3429	12.6147	13.4141	0	0
171.6	1.40105	18.0458	14.3776	17.0157	17.8147	18.3634	10.9602	13.2901	11.0913	11.0986	17.0504	20.7508	16.6868	13.2898	13.5496	13.414	13.3428	12.6145	13.414	0	0
171.7	1.39861	18.0458	14.3776	17.0157	17.8147	18.3634	10.9602	13.2901	11.0913	11.0986	17.0504	20.7505	16.6865	13.2897	13.5494	13.4138	13.3426	12.6143	13.4138	0	0
171.8	1.39662	18.0458	14.3776	17.0157	17.8147	18.3634	10.9602	13.2901	11.0913	11.0986	17.0504	20.7503	16.6863	13.2895	13.5492	13.4136	13.3424	12.6142	13.4136	0	0
171.9	1.3951	18.0458	14.3776	17.0157	17.8147	18.3634	10.9602	13.2901	11.0913	11.0986	17.0504	20.75	16.6861	13.2893	13.549	13.4134	13.3422	12.614	13.4134	0	0
172	1.39406	18.0458	14.3776	17.0157	17.8147	18.3634	10.9602	13.2901	11.0913	11.0986	17.0504	20.7497	16.6859	13.2891	13.5488	13.4133	13.342	12.6138	13.4133	0	0
172.1	1.3935	18.0458	14.3776	17.0157	17.8147	18.3634	10.9602	13.2901	11.0913	11.0986	17.0504	20.7494	16.6856	13.289	13.5487	13.4131	13.3419	12.6137	13.4131	0	0
172.2	1.39344	18.0458	14.3776	17.0157	17.8147	18.3634	10.9602	13.2901	11.0913	11.0986	17.0504	20.7492	16.6854	13.2888	13.5485	13.4129	13.3417	12.6135	13.4129	0	0
172.3	1.39389	18.0458	14.3776	17.0157	17.8147	18.3634	10.9602	13.2901	11.0913	11.0986	17.0504	20.7489	16.6852	13.2886	13.5483	13.4127	13.3415	12.6133	13.4127	0	0
172.4	1.39483	18.0458	14.3776	17.0157	17.8147	18.3634	10.9602	13.2901	11.0913	11.0986	17.0504	20.7486	16.685	13.2884	13.5481	13.4125	13.3413	12.6132	13.4125	0	0
172.5	1.39629	18.0458	14.3776	17.0157	17.8147	18.3634	10.9602	13.2901	11.0913	11.0986	17.0504	20.7483	16.6848	13.2883	13.5479	13.4124	13.3412	12.613	13.4124	0	0
172.6	1.39826	18.0458	14.3776	17.0157	17.8147	18.3634	10.9602	13.2901	11.0913	11.0986	17.0504	20.7481	16.6845	13.2881	13.5478	13.4122	13.341	12.6128	13.4122	0	0
172.7	1.40074	18.0458	14.3776	17.0157	17.8147	18.3634	10.9602	13.2901	11.0913	11.0986	17.0504	20.7478	16.6843	13.2879	13.5476	13.412	13.3408	12.6127	13.412	0	0
172.8	1.40373	18.0458	14.3776	17.0157	17.8147	18.3634	10.9602	13.2901	11.0913	11.0986	17.0504	20.7475	16.6841	13.2877	13.5474	13.4118	13.3406	12.6125	13.4118	0	0
172.9	1.40723	18.0458	14.3776	17.0157	17.8147	18.3634	10.9602	13.2901	11.0913	11.0986	17.0504	20.7473	16.6839	13.2876	13.5472	13.4117	13.3405	12.6124	13.4117	0	0
173	1.41124	18.0458	14.3776	17.0157	17.8147	18.3634	10.9602	13.2901	11.0913	11.0986	17.0504	20.747	16.6837	13.2874	13.5471	13.4115	13.3403	12.6122	13.4115	0	0
173.1	1.41575	18.0458	14.3776	17.0157	17.8147	18.3634	10.9602	13.2901	11.0913	11.0986	17.0504	20.7467	16.6835	13.2872	13.5469	13.4113	13.3401	12.612	13.4113	0	0
173.2	1.42076	18.0458	14.3776	17.0157	17.8147	18.3634	10.9602	13.2901	11.0913	11.0986	17.0504	20.7465	16.6833	13.2871	13.5467	13.4112	13.34	12.6119	13.4112	0	0
173.3	1.42625	18.0458	14.3776	17.0157	17.8147	18.3634	10.9602	13.2901	11.0913	11.0986	17.0504	20.7462	16.683	13.2869	13.5465	13.411	13.3398	12.6117	13.411	0	0
173.4	1.43223	18.0458	14.3776	17.0157	17.8147	18.3634	10.9602	13.2901	11.0913	11.0986	17.0504	20.7459	16.6828	13.2867	13.5464	13.4108	13.3396	12.6115	13.4108	0	0
173.5	1.43868	18.0458	14.3776	17.0157	17.8147	18.3634	10.9602	13.2901	11.0913	11.0986	17.0504	20.7457	16.6826	13.2865	13.5462	13.4106	13.3394	12.6114	13.4106	0	0
173.6	1.4456	18.0458	14.3776	17.0157	17.8147	18.3634	10.9602	13.2901	11.0913	11.0986	17.0504	20.7454	16.6824	13.2864	13.546	13.4105	13.3393	12.6112	13.4105	0	0
173.7	1.45297	18.0458	14.3776	17.0157	17.8147	18.3634	10.9602	13.2901	11.0913	11.0986	17.0504	20.7451	16.6822	13.2862	13.5458	13.4103	13.3391	12.6111	13.4103	0	0
173.8	1.46079	18.0458	14.3776	17.0157	17.8147	18.3634	10.9602	13.2901	11.0913	11.0986	17.0504	20.7449	16.682	13.286	13.5457	13.4101	13.3389	12.6109	13.4101	0	0
173.9	1.46904	18.0458	14.3776	17.0157	17.8147	18.3634	10.9602	13.2901	11.0913	11.0986	17.0504	20.7446	16.6818	13.2859	13.5455	13.41	13.3388	12.6107	13.41	0	0
174	1.47773	18.0458	14.3776	17.0157	17.8147	18.3634	10.9602	13.2901	11.0913	11.0986	17.0504	20.7443	16.6816	13.2857	13.5453	13.4098	13.3386	12.6106	13.4098	0	0
174.1	1.48683	18.0458	14.3776	17.0157	17.8147	18.3634	10.9602	13.2901	11.0913	11.0986	17.0504	20.7441	16.6813	13.2855	13.5452	13.4096	13.3384	12.6104	13.4096	0	0
174.2	1.49634	18.0458	14.3776	17.0157	17.8147	18.3634	10.9602	13.2901	11.0913	11.0986	17.0504	20.7438	16.6811	13.2854	13.545	13.4095	13.3383	12.6103	13.4095	0	0
174.3	1.50625	18.0458	14.3776	17.0157	17.8147	18.3634	10.9602	13.2901	11.0913	11.0986	17.0504	20.7436	16.6809	13.2852	13.5448	13.4093	13.3381	12.6101	13.4093	0	0
174.4	1.51656	18.0458	14.3776	17.0157	17.8147	18.3634	10.9602	13.2901	11.0913	11.0986	17.0504	20.7433	16.6807	13.285	13.5447	13.4091	13.3379	12.61	13.4091	0	0
174.5	1.52725	18.0458	14.3776	17.0157	17.8147	18.3634	10.9602	13.2901	11.0913	11.0986	17.0504	20.7431	16.6805	13.2849	13.5445	13.409	13.3378	12.6098	13.409	0	0
174.6	1.53831	18.0458	14.3776	17.0157	17.8147	18.3634	10.9602	13.2901	11.0913	11.0986	17.0504	20.7428	16.6803	13.2847	13.5443	13.4088	13.3376	12.6096	13.4088	0	0
174.7	1.54974	18.0458	14.3776	17.0157	17.8147	18.3634	10.9602	13.2901	11.0913	11.0986	17.0504	20.7425	16.6801	13.2845	13.5441	13.4086	13.3374	12.6095	13.4086	0	0
174.8	1.56153	18.0458	14.3776	17.0157	17.8147	18.3634	10.9602	13.2901	11.0913	11.0986	17.0504	20.7423	16.6799	13.2844	13.544	13.4085	13.3373	12.6093	13.4085	0	0
174.9	1.57368	18.0458	14.3776	17.0157	17.8147	18.3634	10.9602	13.2901	11.0913	11.0986	17.0504	20.742	16.6797	13.2842	13.5438	13.4083	13.3371	12.6092	13.4083	0	0
175	1.58616	18.0458	14.3776	17.0157	17.8147	18.3634	10.9602	13.2901	11.0913	11.0986	17.0504	20.7418	16.6795	13.2841	13.5436	13.4081	13.3369	12.609	13.4081	0	0
175.1	1.59899	18.0458	14.3776	17.0157	17.8147	18.3634	10.9602	13.2901	11.0913	11.0986	17.0504	20.7415	16.6793	13.2839	13.5435	13.408	13.3368	12.6089	13.408	0	0
175.2	1.61214	18.0458	14.3776	17.0157	17.8147	18.3634	10.9602	13.2901	11.0913	11.0986	17.0504	20.7413	16.6791	13.2837	13.5433	13.4078	13.3366	12.6087	13.4078	0	0
175.3	1.62562	18.0458	14.3776	17.0157	17.8147	18.3634	10.9602	13.2901	11.0913	11.0986	17.0504	20.741	16.6789	13.2836	13.5432	13.4076	13.3365	12.6086	13.4076	0	0
175.4	1.63942	18.0458	14.3776	17.0157	17.8147	18.3634	10.9602	13.2901	11.0913	11.0986	17.0504	20.7408	16.6787	13.2834	13.543	13.4075	13.3363	12.6084	13.4075	0	0
175.5	1.65352	18.0458	14.3776	17.0157	17.8147	18.3634	10.9602	13.2901	11.0913	11.0986	17.0504	20.7405	16.6785	13.2832	13.5428	13.4073	13.3361	12.6082	13.4073	0	0
175.6	1.66793	18.0458	14.3776	17.0157	17.8147	18.3634	10.9602	13.2901	11.0913	11.0986	17.0504	20.7403	16.6783	13.2831	13.5427	13.4071	13.336	12.6081	13.4071	0	0
175.7	1.68264	18.0458	14.3776	17.0157	17.8147	18.3634	10.9602	13.2901	11.0913	11.0986	17.0504	20.74	16.6781	13.2829	13.5425	13.407	13.3358	12.6079	13.407	0	0
175.8	1.69763	18.0458	14.3776	17.0157	17.8147	18.3634	10.9602	13.2901	11.0913	11.0986	17.0504	20.7398	16.6779	13.2828	13.5423	13.4068	13.3356	12.6078	13.4068	0	0
175.9	1.71291	18.0458	14.3776	17.0157	17.8147	18.3634	10.9602	13.2901	11.0913	11.0986	17.0504	20.7395	16.6777	13.2826	13.5422	13.4067	13.3355	12.6076	13.4067	0	0
176	1.72845	18.0458	14.3776	17.0157	17.8147	18.3634	10.9602	13.2901	11.0913	11.0986	17.0504	20.7393	16.6775	13.2824	13.542	13.4065	13.3353	12.6075	13.4065	0	0
176.1	1.74426	18.0458	14.3776	17.0157	17.8147	18.3634	10.9602	13.2901	11.0913	11.0986	17.0504	20.739	16.6773	13.2823	13.5418	13.4063	13.3352	12.6073	13.4063	0	0
176.2	1.76032	18.0458	14.3776	17.0157	17.8147	18.3634	10.9602	13.2901	11.0913	11.0986	17.0504	20.7388	16.6771	13.2821	13.5417	13.4062	13.335	12.6072	13.4062	0	0
176.3	1.77662	18.0458	14.3776	17.0157	17.8147	18.3634	10.9602	13.2901	11.0913	11.0986	17.0504	20.7385	16.6769	13.282	13.5415	13.406	13.3348	12.607	13.406	0	0
176.4	1.79316	18.0458	14.3776	17.0157	17.8147	18.3634	10.9602	13.2901	11.0913	11.0986	17.0504	20.7383	16.6767	13.2818	13.5414	13.4059	13.3347	12.6069	13.4059	0	0
176.5	1.80991	18.0458	14.3776	17.0157	17.8147	18.3634	10.9602	13.2901	11.0913	11.0986	17.0504	20.738	16.6765	13.2817	13.5412	13.4057	13.3345	12.6067	13.4057	0	0
176.6	1.82686	18.0458	14.3776	17.0157	17.8147	18.3634	10.9602	13.2901	11.0913	11.0986	17.0504	20.7378	16.6763	13.2815	13.541	13.4055	13.3344	12.6066	13.4055	0	0
176.7	1.84401	18.0458	14.3776	17.0157	17.8147	18.3634	10.9602	13.2901	11.0913	11.0986	17.0504	20.7375	16.6761	13.2813	13.5409	13.4054	13.3342	12.6064	13.4054	0	0
176.8	1.86134	18.0458	14.3776	17.0157	17.8147	18.3634	10.9602	13.2901	11.0913	11.0986	17.0504	20.7373	16.6759	13.2812	13.5407	13.4052	13.3341	12.6063	13.4052	0	0
176.9	1.87883	18.0458	14.3776	17.0157	17.8147	18.3634	10.9602	13.2901	11.0913	11.0986	17.0504	20.737	16.6757	13.281	13.5406	13.4051	13.3339	12.6061	13.4051	0	0
177	1.89646	18.0458	14.3776	17.0157	17.8147	18.3634	10.9602	13.2901	11.0913	11.0986	17.0504	20.7368	16.6755	13.2809	13.5404	13.4049	13.3337	12.606	13.4049	0	0
177.1	1.91423	18.0458	14.3776	17.0157	17.8147	18.3634	10.9602	13.2901	11.0913	11.0986	17.0504	20.7366	16.6753	13.2807	13.5402	13.4048	13.3336	12.6058	13.4048	0	0
177.2	1.9321	18.0458	14.3776	17.0157	17.8147	18.3634	10.9602	13.2901	11.0913	11.0986	17.0504	20.7363	16.6751	13.2806	13.5401	13.4046	13.3334	12.6057	13.4046	0	0
177.3	1.95008	18.0458	14.3776	17.0157	17.8147	18.3634	10.9602	13.2901	11.0913	11.0986	17.0504	20.7361	16.6749	13.2804	13.5399	13.4044	13.3333	12.6056	13.4044	0	0
177.4	1.96814	18.0458	14.3776	17.0157	17.8147	18.3634	10.9602	13.2901	11.0913	11.0986	17.0504	20.7358	16.6747	13.2803	13.5398	13.4043	13.3331	12.6054	13.4043	0	0
177.5	1.98626	18.0458	14.3776	17.0157	17.8147	18.3634	10.9602	13.2901	11.0913	11.0986	17.0504	20.7356	16.6745	13.2801	13.5396	13.4041	13.333	12.6053	13.4041	0	0
177.6	2.00442	18.0458	14.3776	17.0157	17.8147	18.3634	10.9602	13.2901	11.0913	11.0986	17.0504	20.7354	16.6743	13.2799	13.5395	13.404	13.3328	12.6051	13.404	0	0
177.7	2.02261	18.0458	14.3776	17.0157	17.8147	18.3634	10.9602	13.2901	11.0913	11.0986	17.0504	20.7351	16.6741	13.2798	13.5393	13.4038	13.3327	12.605	13.4038	0	0
177.8	2.04081	18.0458	14.3776	17.0157	17.8147	18.3634	10.9602	13.2901	11.0913	11.0986	17.0504	20.7349	16.6739	13.2796	13.5391	13.4037	13.3325	12.6048	13.4037	0	0
177.9	2.059	18.0458	14.3776	17.0157	17.8147	18.3634	10.9602	13.2901	11.0913	11.0986	17.0504	20.7346	16.6737	13.2795	13.539	13.4035	13.3324	12.6047	13.4035	0	0
178	2.07716	18.0458	14.3776	17.0157	17.8147	18.3634	10.9602	13.2901	11.0913	11.0986	17.0504	20.7344	16.6736	13.2793	13.5388	13.4034	13.3322	12.6045	13.4034	0	0
178.1	2.09527	18.0458	14.3776	17.0157	17.8147	18.3634	10.9602	13.2901	11.0913	11.0986	17.0504	20.7342	16.6734	13.2792	13.5387	13.4032	13.3321	12.6044	13.4032	0	0
178.2	2.11332	18.0458	14.3776	17.0157	17.8147	18.3634	10.9602	13.2901	11.0913	11.0986	17.0504	20.7339	16.6732	13.279	13.5385	13.4031	13.3319	12.6043	13.4031	0	0
178.3	2.13127	18.0458	14.3776	17.0157	17.8147	18.3634	10.9602	13.2901	11.0913	11.0986	17.0504	20.7337	16.673	13.2789	13.5384	13.4029	13.3318	12.6041	13.4029	0	0
178.4	2.14911	18.0458	14.3776	17.0157	17.8147	18.3634	10.9602	13.2901	11.0913	11.0986	17.0504	20.7335	16.6728	13.2787	13.5382	13.4028	13.3316	12.604	13.4028	0	0
178.5	2.16683	18.0458	14.3776	17.0157	17.8147	18.3634	10.9602	13.2901	11.0913	11.0986	17.0504	20.7332	16.6726	13.2786	13.5381	13.4026	13.3315	12.6038	13.4026	0	0
178.6	2.18439	18.0458	14.3776	17.0157	17.8147	18.3634	10.9602	13.2901	11.0913	11.0986	17.0504	20.733	16.6724	13.2784	13.5379	13.4025	13.3313	12.6037	13.4025	0	0
178.7	2.20177	18.0458	14.3776	17.0157	17.8147	18.3634	10.9602	13.2901	11.0913	11.0986	17.0504	20.7328	16.6722	13.2783	13.5378	13.4023	13.3312	12.6035	13.4023	0	0
178.8	2.21896	18.0458	14.3776	17.0157	17.8147	18.3634	10.9602	13.2901	11.0913	11.0986	17.0504	20.7325	16.6721	13.2781	13.5376	13.4022	13.331	12.6034	13.4022	0	0
178.9	2.23594	18.0458	14.3776	17.0157	17.8147	18.3634	10.9602	13.2901	11.0913	11.0986	17.0504	20.7323	16.6719	13.278	13.5375	13.402	13.3309	12.6033	13.402	0	0
179	2.25268	18.0458	14.3776	17.0157	17.8147	18.3634	10.9602	13.2901	11.0913	11.0986	17.0504	20.7321	16.6717	13.2778	13.5373	13.4019	13.3307	12.6031	13.4019	0	0
179.1	2.26916	18.0458	14.3776	17.0157	17.8147	18.3634	10.9602	13.2901	11.0913	11.0986	17.0504	20.7318	16.6715	13.2777	13.5372	13.4017	13.3306	12.603	13.4017	0	0
179.2	2.28536	18.0458	14.3776	17.0157	17.8147	18.3634	10.9602	13.2901	11.0913	11.0986	17.0504	20.7316	16.6713	13.2775	13.537	13.4016	13.3304	12.6028	13.4016	0	0
179.3	2.30126	18.0458	14.3776	17.0157	17.8147	18.3634	10.9602	13.2901	11.0913	11.0986	17.0504	20.7314	16.6711	13.2774	13.5369	13.4014	13.3303	12.6027	13.4014	0	0
179.4	2.31684	18.0458	14.3776	17.0157	17.8147	18.3634	10.9602	13.2901	11.0913	11.0986	17.0504	20.7312	16.6709	13.2773	13.5367	13.4013	13.3301	12.6026	13.4013	0	0
179.5	2.33208	18.0458	14.3776	17.0157	17.8147	18.3634	10.9602	13.2901	11.0913	11.0986	17.0504	20.7309	16.6708	13.2771	13.5366	13.4011	13.33	12.6024	13.4011	0	0
179.6	2.34697	18.0458	14.3776	17.0157	17.8147	18.3634	10.9602	13.2901	11.0913	11.0986	17.0504	20.7307	16.6706	13.277	13.5364	13.401	13.3298	12.6023	13.401	0	0
179.7	2.36148	18.0458	14.3776	17.0157	17.8147	18.3634	10.9602	13.2901	11.0913	11.0986	17.0504	20.7305	16.6704	13.2768	13.5363	13.4008	13.3297	12.6021	13.4008	0	0
[truncated: 8,113 more rows]

## Sheet: Figure 1D
time (ms)	stimulus (Volt)	stimulus (dB)	Spike frequency responses (Hz), step stimulus
			Trial 1	Trial 2	Trial 3	Trial 4	Trial 5	Trial 6	Trial 7	Trial 8	Trial 9	Trial 10
-100	0	0	0	0	0	0	0	0	0	0	0	0
-99.9	0	0	0	0	0	0	0	0	0	0	0	0
-99.8	0	0	0	0	0	0	0	0	0	0	0	0
-99.7	0	0	0	0	0	0	0	0	0	0	0	0
-99.6	0	0	0	0	0	0	0	0	0	0	0	0
-99.5	0	0	0	0	0	0	0	0	0	0	0	0
-99.4	0	0	0	0	0	0	0	0	0	0	0	0
-99.3	0	0	0	0	0	0	0	0	0	0	0	0
-99.2	0	0	0	0	0	0	0	0	0	0	0	0
-99.1	0	0	0	0	0	0	0	0	0	0	0	0
-99	0	0	0	0	0	0	0	0	0	0	0	0
-98.9	0	0	0	0	0	0	0	0	0	0	0	0
-98.8	0	0	0	0	0	0	0	0	0	0	0	0
-98.7	0	0	0	0	0	0	0	0	0	0	0	0
-98.6	0	0	0	0	0	0	0	0	0	0	0	0
-98.5	0	0	0	0	0	0	0	0	0	0	0	0
-98.4	0	0	0	0	0	0	0	0	0	0	0	0
-98.3	0	0	0	0	0	0	0	0	0	0	0	0
-98.2	0	0	0	0	0	0	0	0	0	0	0	0
-98.1	0	0	0	0	0	0	0	0	0	0	0	0
-98	0	0	0	0	0	0	0	0	0	0	0	0
-97.9	0	0	0	0	0	0	0	0	0	0	0	0
-97.8	0	0	0	0	0	0	0	0	0	0	0	0
-97.7	0	0	0	0	0	0	0	0	0	0	0	0
-97.6	0	0	0	0	0	0	0	0	0	0	0	0
-97.5	0	0	0	0	0	0	0	0	0	0	0	0
-97.4	0	0	0	0	0	0	0	0	0	0	0	0
-97.3	0	0	0	0	0	0	0	0	0	0	0	0
-97.2	0	0	0	0	0	9.28074	0	0	0	0	0	0
-97.1	0	0	0	0	0	9.28074	0	0	0	0	0	0
-97	0	0	0	0	0	9.28074	0	0	0	0	0	0
-96.9	0	0	0	0	0	9.28074	0	0	0	0	0	0
-96.8	0	0	0	0	0	9.28074	0	0	0	0	0	0
-96.7	0	0	0	0	0	9.28074	0	0	0	0	0	0
-96.6	0	0	0	0	0	9.28074	0	0	0	0	0	0
-96.5	0	0	0	0	0	9.28074	0	0	0	0	0	0
-96.4	0	0	0	0	0	9.28074	0	0	0	0	0	0
-96.3	0	0	0	0	0	9.28074	0	0	0	0	0	0
-96.2	0	0	0	0	0	9.28074	0	0	0	0	0	0
-96.1	0	0	0	0	0	9.28074	0	0	0	0	0	0
-96	0	0	0	0	0	9.28074	0	0	0	0	0	0
-95.9	0	0	0	0	0	9.28074	0	0	0	0	0	0
-95.8	0	0	0	0	0	9.28074	0	0	0	0	0	0
-95.7	0	0	0	0	0	9.28074	0	0	0	0	0	0
-95.6	0	0	0	0	0	9.28074	0	0	0	0	0	0
-95.5	0	0	0	0	0	9.28074	0	0	0	0	0	0
-95.4	0	0	0	0	0	9.28074	0	0	0	0	0	0
-95.3	0	0	0	0	0	9.28074	0	0	0	0	0	0
-95.2	0	0	0	0	0	9.28074	0	0	0	0	0	0
-95.1	0	0	0	0	0	9.28074	0	0	0	0	0	0
-95	0	0	0	0	0	9.28074	0	0	0	0	0	0
-94.9	0	0	0	0	0	9.28074	0	0	0	0	0	0
-94.8	0	0	0	0	0	9.28074	0	0	0	0	0	0
-94.7	0	0	0	0	0	9.28074	0	0	0	0	0	0
-94.6	0	0	0	0	0	9.28074	0	0	0	0	0	0
-94.5	0	0	0	0	0	9.28074	0	0	0	0	0	0
-94.4	0	0	0	0	0	9.28074	0	0	0	0	0	0
-94.3	0	0	0	0	0	9.28074	0	0	0	0	0	0
-94.2	0	0	0	0	0	9.28074	0	0	0	0	0	0
-94.1	0	0	0	0	0	9.28074	0	0	0	0	0	0
-94	0	0	0	0	0	9.28074	0	0	0	0	0	0
-93.9	0	0	0	0	0	9.28074	0	0	0	0	0	0
-93.8	0	0	0	0	0	9.28074	0	0	0	0	0	0
-93.7	0	0	0	0	0	9.28074	0	0	0	0	0	0
-93.6	0	0	0	0	0	9.28074	0	0	0	0	0	0
-93.5	0	0	0	0	0	9.28074	0	0	0	0	0	0
-93.4	0	0	0	0	0	9.28074	0	0	0	0	0	0
-93.3	0	0	0	0	0	9.28074	0	0	0	0	0	0
-93.2	0	0	0	0	0	9.28074	0	0	0	0	0	0
-93.1	0	0	0	0	0	9.28074	0	0	0	0	0	0
-93	0	0	0	0	0	9.28074	0	0	0	0	0	0
-92.9	0	0	0	0	0	9.28074	0	0	0	0	0	0
-92.8	0	0	0	0	0	9.28074	0	0	0	0	0	0
-92.7	0	0	0	0	0	9.28074	0	0	0	0	0	0
-92.6	0	0	0	0	0	9.28074	0	0	0	0	0	0
-92.5	0	0	0	0	0	9.28074	0	0	0	0	0	0
-92.4	0	0	0	0	0	9.28074	0	0	0	0	0	0
-92.3	0	0	0	0	0	9.28074	0	0	0	0	0	0
-92.2	0	0	0	0	0	9.28074	0	0	0	0	0	0
-92.1	0	0	0	0	0	9.28074	0	0	0	0	0	0
-92	0	0	0	0	0	9.28074	0	0	0	0	0	0
-91.9	0	0	0	0	0	9.28074	0	0	0	0	0	0
-91.8	0	0	0	0	0	9.28074	0	0	0	0	0	0
-91.7	0	0	0	0	0	9.28074	0	0	0	0	0	0
-91.6	0	0	0	0	0	9.28074	0	0	0	0	0	0
-91.5	0	0	0	0	0	9.28074	0	0	0	0	0	0
-91.4	0	0	0	0	0	9.28074	0	0	0	0	0	0
-91.3	0	0	0	0	0	9.28074	0	0	0	0	0	0
-91.2	0	0	0	0	0	9.28074	0	0	0	0	0	0
-91.1	0	0	0	0	0	9.28074	0	0	0	0	0	0
-91	0	0	0	0	0	9.28074	0	0	0	0	0	0
-90.9	0	0	0	0	0	9.28074	0	0	0	0	0	0
-90.8	0	0	0	0	0	9.28074	0	0	0	0	0	0
-90.7	0	0	0	0	0	9.28074	0	0	0	0	0	0
-90.6	0	0	0	0	0	9.28074	0	0	0	0	0	0
-90.5	0	0	0	0	0	9.28074	0	0	0	0	0	0
-90.4	0	0	0	0	0	9.28074	0	0	0	0	0	0
-90.3	0	0	0	0	0	9.28074	0	0	0	0	0	0
-90.2	0	0	0	0	0	9.28074	0	0	0	0	0	0
-90.1	0	0	0	0	0	9.28074	0	0	0	0	0	0
-90	0	0	0	0	0	9.28074	0	0	0	0	0	0
-89.9	0	0	0	0	0	9.28074	0	0	0	0	0	0
-89.8	0	0	0	0	0	9.28074	0	0	0	0	0	0
-89.7	0	0	0	0	0	9.28074	0	0	0	0	0	0
-89.6	0	0	0	0	0	9.28074	0	0	0	0	0	0
-89.5	0	0	0	0	0	9.28074	0	0	0	0	0	0
-89.4	0	0	0	0	0	9.28074	0	0	0	0	0	0
-89.3	0	0	0	0	0	9.28074	0	0	0	0	0	0
-89.2	0	0	0	0	0	9.28074	0	0	0	0	0	0
-89.1	0	0	0	0	0	9.28074	0	0	0	0	0	0
-89	0	0	0	0	0	9.28074	0	0	0	0	0	0
-88.9	0	0	0	0	0	9.28074	0	0	0	0	0	0
-88.8	0	0	0	0	0	9.28074	0	0	0	0	0	0
-88.7	0	0	0	0	0	9.28074	0	0	0	0	0	0
-88.6	0	0	0	0	0	9.28074	0	0	0	0	0	0
-88.5	0	0	0	0	0	9.28074	0	0	0	0	0	0
-88.4	0	0	0	0	0	9.28074	0	0	0	0	0	0
-88.3	0	0	0	0	0	9.28074	0	0	0	0	0	0
-88.2	0	0	0	0	0	9.28074	0	0	0	0	0	0
-88.1	0	0	0	0	0	9.28074	0	0	0	0	0	0
-88	0	0	0	0	0	9.28074	0	0	0	0	0	0
-87.9	0	0	0	0	0	9.28074	0	0	0	0	0	0
-87.8	0	0	0	0	0	9.28074	0	0	0	0	0	0
-87.7	0	0	0	0	0	9.28074	0	0	0	0	0	0
-87.6	0	0	0	0	0	9.28074	0	0	0	0	0	0
-87.5	0	0	0	0	0	9.28074	0	0	0	0	0	0
-87.4	0	0	0	0	0	9.28074	0	0	0	0	0	0
-87.3	0	0	0	0	0	9.28074	0	0	0	0	0	0
-87.2	0	0	0	0	0	9.28074	0	0	0	0	0	0
-87.1	0	0	0	0	0	9.28074	0	0	0	0	0	0
-87	0	0	0	0	0	9.28074	0	0	0	0	0	0
-86.9	0	0	0	0	0	9.28074	0	0	0	0	0	0
-86.8	0	0	0	0	0	9.28074	0	0	0	0	0	0
-86.7	0	0	0	0	0	9.28074	0	0	0	0	0	0
-86.6	0	0	0	0	0	9.28074	0	0	0	0	0	0
-86.5	0	0	0	0	0	9.28074	0	0	0	0	0	0
-86.4	0	0	0	0	0	9.28074	0	0	0	0	0	0
-86.3	0	0	0	0	0	9.28074	0	0	0	0	0	0
-86.2	0	0	0	0	0	9.28074	0	0	0	0	0	0
-86.1	0	0	0	0	0	9.28074	0	0	0	0	0	0
-86	0	0	0	0	0	9.28074	0	0	0	0	0	0
-85.9	0	0	0	0	0	9.28074	0	0	0	0	0	0
-85.8	0	0	0	0	0	9.28074	0	0	0	0	0	0
-85.7	0	0	0	0	0	9.28074	0	0	0	0	0	0
-85.6	0	0	0	0	0	9.28074	0	0	0	0	0	0
-85.5	0	0	0	0	0	9.28074	0	0	0	0	0	0
-85.4	0	0	0	0	0	9.28074	0	0	0	0	0	0
-85.3	0	0	0	0	0	9.28074	0	0	0	0	0	0
-85.2	0	0	0	0	0	9.28074	0	0	0	0	0	0
-85.1	0	0	0	0	0	9.28074	0	0	0	0	0	0
-85	0	0	0	0	0	9.28074	0	0	0	0	0	0
-84.9	0	0	0	0	0	9.28074	0	0	0	0	0	0
-84.8	0	0	0	0	0	9.28074	0	0	0	0	0	0
-84.7	0	0	0	0	0	9.28074	0	0	0	0	0	0
-84.6	0	0	0	0	0	9.28074	0	0	0	0	0	0
-84.5	0	0	0	0	0	9.28074	0	0	0	0	0	0
-84.4	0	0	0	0	0	9.28074	0	0	0	0	0	0
-84.3	0	0	0	0	0	9.28074	0	0	0	0	0	0
-84.2	0	0	0	0	0	9.28074	0	0	0	0	0	0
-84.1	0	0	0	0	0	9.28074	0	0	0	0	0	0
-84	0	0	0	0	0	9.28074	0	0	0	0	0	0
-83.9	0	0	0	0	0	9.28074	0	0	0	0	0	0
-83.8	0	0	0	0	0	9.28074	0	0	0	0	0	0
-83.7	0	0	0	0	0	9.28074	0	0	0	0	0	0
-83.6	0	0	0	0	0	9.28074	0	0	0	0	0	0
-83.5	0	0	0	0	0	9.28074	0	0	0	0	0	0
-83.4	0	0	0	0	0	9.28074	0	0	0	0	0	0
-83.3	0	0	0	0	0	9.28074	0	0	0	0	0	0
-83.2	0	0	0	0	0	9.28074	0	0	0	0	0	0
-83.1	0	0	0	0	0	9.28074	0	0	0	0	0	0
-83	0	0	0	0	0	9.28074	0	0	0	0	0	0
-82.9	0	0	0	0	0	9.28074	0	0	0	0	0	0
-82.8	0	0	0	0	0	9.28074	0	0	0	0	0	0
-82.7	0	0	0	0	0	9.28074	0	0	0	0	0	0
-82.6	0	0	0	0	0	9.28074	0	0	0	0	0	0
-82.5	0	0	0	0	0	9.28074	0	0	0	0	0	0
-82.4	0	0	0	0	0	9.28074	0	0	0	0	0	0
-82.3	0	0	0	0	0	9.28074	0	0	0	0	0	0
-82.2	0	0	0	0	0	9.28074	0	0	0	0	0	0
-82.1	0	0	0	0	0	9.28074	0	0	0	0	0	0
-82	0	0	0	0	0	9.28074	0	0	0	0	0	0
-81.9	0	0	0	0	0	9.28074	0	0	0	0	0	0
-81.8	0	0	0	0	0	9.28074	0	0	0	0	0	0
-81.7	0	0	0	0	0	9.28074	0	0	0	0	0	0
-81.6	0	0	0	0	0	9.28074	0	0	0	0	0	0
-81.5	0	0	0	0	0	9.28074	0	0	0	0	0	0
-81.4	0	0	0	0	0	9.28074	0	0	0	0	0	0
-81.3	0	0	0	0	0	9.28074	0	0	0	0	0	0
-81.2	0	0	0	0	0	9.28074	0	0	0	0	0	0
-81.1	0	0	0	0	0	9.28074	0	0	0	0	0	0
-81	0	0	0	0	0	9.28074	0	0	0	0	0	0
-80.9	0	0	0	0	0	9.28074	0	0	0	0	0	0
-80.8	0	0	0	0	0	9.28074	0	0	0	0	0	0
-80.7	0	0	0	0	0	9.28074	0	0	0	0	0	0
-80.6	0	0	0	0	0	9.28074	0	0	0	0	0	0
-80.5	0	0	0	0	0	9.28074	0	0	0	0	0	0
-80.4	0	0	0	0	0	9.28074	0	0	0	0	0	0
-80.3	0	0	0	0	0	9.28074	0	0	0	0	0	0
-80.2	0	0	0	0	0	9.28074	0	0	0	0	0	0
-80.1	0	0	0	0	0	9.28074	0	0	0	0	0	0
-80	0	0	0	0	0	9.28074	0	0	0	0	0	0
-79.9	0	0	0	0	0	9.28074	0	0	0	0	0	0
-79.8	0	0	0	0	0	9.28074	0	0	0	0	0	0
-79.7	0	0	0	0	0	9.28074	0	0	0	0	0	0
-79.6	0	0	0	0	0	9.28074	0	0	0	0	0	0
-79.5	0	0	0	0	0	9.28074	0	0	0	0	0	0
-79.4	0	0	0	0	0	9.28074	0	0	0	0	0	0
-79.3	0	0	0	0	0	9.28074	0	0	0	0	0	0
-79.2	0	0	0	0	0	9.28074	0	0	0	0	0	0
-79.1	0	0	0	0	0	9.28074	0	0	0	0	0	0
-79	0	0	0	0	0	9.28074	0	0	0	0	0	0
-78.9	0	0	0	0	0	9.28074	0	0	0	0	0	0
-78.8	0	0	0	0	0	9.28074	0	0	0	0	0	0
-78.7	0	0	0	0	0	9.28074	0	0	0	0	0	0
-78.6	0	0	0	0	0	9.28074	0	0	0	0	0	0
-78.5	0	0	0	0	0	9.28074	0	0	0	0	0	0
-78.4	0	0	0	0	0	9.28074	0	0	0	0	0	0
-78.3	0	0	0	0	0	9.28074	0	0	0	0	0	0
-78.2	0	0	0	0	0	9.28074	0	0	0	0	0	0
-78.1	0	0	0	0	0	9.28074	0	0	0	0	0	0
-78	0	0	0	0	0	9.28074	0	0	0	0	0	0
-77.9	0	0	0	0	0	9.28074	0	0	0	0	0	0
-77.8	0	0	0	0	0	9.28074	0	0	0	0	0	0
-77.7	0	0	0	0	0	9.28074	0	0	0	0	0	0
-77.6	0	0	0	0	0	9.28074	0	0	0	0	0	0
-77.5	0	0	0	0	0	9.28074	0	0	0	0	0	0
-77.4	0	0	0	0	0	9.28074	0	0	0	0	0	0
-77.3	0	0	0	0	0	9.28074	0	0	0	0	0	0
-77.2	0	0	0	0	0	9.28074	0	0	0	0	0	0
-77.1	0	0	0	0	0	9.28074	0	0	0	0	0	0
-77	0	0	0	0	0	9.28074	0	0	0	0	0	0
-76.9	0	0	0	0	0	9.28074	0	0	0	0	0	0
-76.8	0	0	0	0	0	9.28074	0	0	0	0	0	0
-76.7	0	0	0	0	0	9.28074	0	0	0	0	0	0
-76.6	0	0	0	0	0	9.28074	0	0	0	0	0	0
-76.5	0	0	0	0	0	9.28074	0	0	0	0	0	0
-76.4	0	0	0	0	0	9.28074	0	0	0	0	0	0
-76.3	0	0	0	0	0	9.28074	0	0	0	0	0	0
-76.2	0	0	0	0	0	9.28074	0	0	0	0	0	0
-76.1	0	0	0	0	0	9.28074	0	0	0	0	0	0
-76	0	0	0	0	0	9.28074	0	0	0	0	0	0
-75.9	0	0	0	0	0	9.28074	0	0	0	0	0	0
-75.8	0	0	0	0	0	9.28074	0	0	0	0	0	0
-75.7	0	0	0	0	0	9.28074	0	0	0	0	0	0
-75.6	0	0	0	0	0	9.28074	0	0	0	0	0	0
-75.5	0	0	0	0	0	9.28074	0	0	0	0	0	0
-75.4	0	0	0	0	0	9.28074	0	0	0	0	0	0
-75.3	0	0	0	0	0	9.28074	0	0	0	0	0	0
-75.2	0	0	0	0	0	9.28074	0	0	0	0	0	0
-75.1	0	0	0	0	0	9.28074	0	0	0	0	0	0
-75	0	0	0	0	0	9.28074	0	0	0	0	0	0
-74.9	0	0	0	0	0	9.28074	0	0	0	0	0	0
-74.8	0	0	0	0	0	9.28074	0	0	0	0	0	0
-74.7	0	0	0	0	0	9.28074	0	0	0	0	0	0
-74.6	0	0	0	0	0	9.28074	0	0	0	0	0	0
-74.5	0	0	0	0	0	9.28074	0	0	0	0	0	0
-74.4	0	0	0	0	0	9.28074	0	0	0	0	0	0
-74.3	0	0	0	0	0	9.28074	0	0	0	0	0	0
-74.2	0	0	0	0	0	9.28074	0	0	0	0	0	0
-74.1	0	0	0	0	0	9.28074	0	0	0	0	0	0
-74	0	0	0	0	0	9.28074	0	0	0	0	0	0
-73.9	0	0	0	0	0	9.28074	0	0	0	0	0	0
-73.8	0	0	0	0	0	9.28074	0	0	0	0	0	0
-73.7	0	0	0	0	0	9.28074	0	0	0	0	0	0
-73.6	0	0	0	0	0	9.28074	0	0	0	0	0	0
-73.5	0	0	0	0	0	9.28074	0	0	0	0	0	0
-73.4	0	0	0	0	0	9.28074	0	0	0	0	0	0
-73.3	0	0	0	0	0	9.28074	0	0	0	0	0	0
-73.2	0	0	0	0	0	9.28074	0	0	0	0	0	0
-73.1	0	0	0	0	0	9.28074	0	0	0	0	0	0
-73	0	0	0	0	0	9.28074	0	0	0	0	0	0
-72.9	0	0	0	0	0	9.28074	0	0	0	0	0	0
-72.8	0	0	0	0	0	9.28074	0	0	0	0	0	0
-72.7	0	0	0	0	0	9.28074	0	0	0	0	0	0
-72.6	0	0	0	0	0	9.28074	0	0	0	0	0	0
-72.5	0	0	0	0	0	9.28074	0	0	0	0	0	0
-72.4	0	0	0	0	0	9.28074	0	0	0	0	0	0
-72.3	0	0	0	0	0	9.28074	0	0	0	0	0	0
-72.2	0	0	0	0	0	9.28074	0	0	0	0	0	0
-72.1	0	0	0	0	0	9.28074	0	0	0	0	0	0
-72	0	0	0	0	0	9.28074	0	0	0	0	0	0
-71.9	0	0	0	0	0	9.28074	0	0	0	0	0	0
-71.8	0	0	0	0	0	9.28074	0	0	0	0	0	0
-71.7	0	0	0	0	0	9.28074	0	0	0	0	0	0
-71.6	0	0	0	0	0	9.28074	0	0	0	0	0	0
-71.5	0	0	0	0	0	9.28074	0	0	0	0	0	0
-71.4	0	0	0	0	0	9.28074	0	0	0	0	0	0
-71.3	0	0	0	0	0	9.28074	0	0	0	0	0	0
-71.2	0	0	0	0	0	9.28074	0	0	0	0	0	0
-71.1	0	0	0	0	0	9.28074	0	0	0	0	0	0
-71	0	0	0	0	0	9.28074	0	0	0	0	0	0
-70.9	0	0	0	0	0	9.28074	0	0	0	0	0	0
-70.8	0	0	0	0	0	9.28074	0	0	0	0	0	0
-70.7	0	0	0	0	0	9.28074	0	0	0	0	0	0
-70.6	0	0	0	0	0	9.28074	0	0	0	0	0	0
-70.5	0	0	0	0	0	9.28074	0	0	0	0	0	0
-70.4	0	0	0	0	0	9.28074	0	0	0	0	0	0
-70.3	0	0	0	0	0	9.28074	0	0	0	0	0	0
-70.2	0	0	0	0	0	9.28074	0	0	0	0	0	0
-70.1	0	0	0	0	0	9.28074	0	0	0	0	0	0
-70	0	0	0	0	0	9.28074	0	0	0	0	0	0
-69.9	0	0	0	0	0	9.28074	0	0	0	0	0	0
-69.8	0	0	0	0	0	9.28074	0	0	0	0	0	0
-69.7	0	0	0	0	0	9.28074	0	0	0	0	0	0
-69.6	0	0	0	0	0	9.28074	0	0	0	0	0	0
-69.5	0	0	0	0	0	9.28074	0	0	0	0	0	0
-69.4	0	0	0	0	0	9.28074	0	0	0	0	0	0
-69.3	0	0	0	0	0	9.28074	0	0	0	0	0	0
-69.2	0	0	0	0	0	9.28074	0	0	0	0	0	0
-69.1	0	0	0	0	0	9.28074	0	0	0	0	0	0
-69	0	0	0	0	0	9.28074	0	0	0	0	0	0
-68.9	0	0	0	0	0	9.28074	0	0	0	0	0	0
-68.8	0	0	0	0	0	9.28074	0	0	0	0	0	0
-68.7	0	0	0	0	0	9.28074	0	0	0	0	0	0
-68.6	0	0	0	0	0	9.28074	0	0	0	0	0	0
-68.5	0	0	0	0	0	9.28074	0	0	0	0	0	0
-68.4	0	0	0	0	0	9.28074	0	0	0	0	0	0
-68.3	0	0	0	0	0	9.28074	0	0	0	0	0	0
-68.2	0	0	0	0	0	9.28074	0	0	0	0	0	0
-68.1	0	0	0	0	0	9.28074	0	0	0	0	0	0
-68	0	0	0	0	0	9.28074	0	0	0	0	0	0
-67.9	0	0	0	0	0	9.28074	0	0	0	0	0	0
-67.8	0	0	0	0	0	9.28074	0	0	0	0	0	0
-67.7	0	0	0	0	0	9.28074	0	0	0	0	0	0
-67.6	0	0	0	0	0	9.28074	0	0	0	0	0	0
-67.5	0	0	0	0	0	9.28074	0	0	0	0	0	0
-67.4	0	0	0	0	0	9.28074	0	0	0	0	0	0
-67.3	0	0	0	0	0	9.28074	0	0	0	0	0	0
-67.2	0	0	0	0	0	9.28074	0	0	0	0	0	0
-67.1	0	0	0	0	0	9.28074	0	0	0	0	0	0
-67	0	0	0	0	0	9.28074	0	0	0	0	0	0
-66.9	0	0	0	0	0	9.28074	0	0	0	0	0	0
-66.8	0	0	0	0	0	9.28074	0	0	0	0	0	0
-66.7	0	0	0	0	0	9.28074	0	0	0	0	0	0
-66.6	0	0	0	0	0	9.28074	0	0	0	0	0	0
-66.5	0	0	0	0	0	9.28074	0	0	0	0	0	0
-66.4	0	0	0	0	0	9.28074	0	0	0	0	0	0
-66.3	0	0	0	0	0	9.28074	0	0	0	0	0	0
-66.2	0	0	0	0	0	9.28074	0	0	0	0	0	0
-66.1	0	0	0	0	0	9.28074	0	0	0	0	0	0
-66	0	0	0	0	0	9.28074	0	0	0	0	0	0
-65.9	0	0	0	0	0	9.28074	0	0	0	0	0	0
-65.8	0	0	0	0	0	9.28074	0	0	0	0	0	0
-65.7	0	0	0	0	0	9.28074	0	0	0	0	0	0
-65.6	0	0	0	0	0	9.28074	0	0	0	0	0	0
-65.5	0	0	0	0	0	9.28074	0	0	0	0	0	0
-65.4	0	0	0	0	0	9.28074	0	0	0	0	0	0
-65.3	0	0	0	0	0	9.28074	0	0	0	0	0	0
-65.2	0	0	0	0	0	9.28074	0	0	0	0	0	0
-65.1	0	0	0	0	0	9.28074	0	0	0	0	0	0
-65	0	0	0	0	0	9.28074	0	0	0	0	0	0
-64.9	0	0	0	0	0	9.28074	0	0	0	0	0	0
-64.8	0	0	0	0	0	9.28074	0	0	0	0	0	0
-64.7	0	0	0	0	0	9.28074	0	0	0	0	0	0
-64.6	0	0	0	0	0	9.28074	0	0	0	0	0	0
-64.5	0	0	0	0	0	9.28074	0	0	0	0	0	0
-64.4	0	0	0	0	0	9.28074	0	0	0	0	0	0
-64.3	0	0	0	0	0	9.28074	0	0	0	0	0	0
-64.2	0	0	0	0	0	9.28074	0	0	0	0	0	0
-64.1	0	0	0	0	0	9.28074	0	0	0	0	0	0
-64	0	0	0	0	0	9.28074	0	0	0	0	0	0
-63.9	0	0	0	0	0	9.28074	0	0	0	0	0	0
-63.8	0	0	0	0	0	9.28074	0	0	0	0	0	0
-63.7	0	0	0	0	0	9.28074	0	0	0	0	0	0
-63.6	0	0	0	0	0	9.28074	0	0	0	0	0	0
-63.5	0	0	0	0	0	9.28074	0	0	0	0	0	0
-63.4	0	0	0	0	0	9.28074	0	0	0	0	0	0
-63.3	0	0	0	0	0	9.28074	0	0	0	0	0	0
-63.2	0	0	0	0	0	9.28074	0	0	0	0	0	0
-63.1	0	0	0	0	0	9.28074	0	0	0	0	0	0
-63	0	0	0	0	0	9.28074	0	0	0	0	0	0
-62.9	0	0	0	0	0	9.28074	0	0	0	0	0	0
-62.8	0	0	0	0	0	9.28074	0	0	0	0	0	0
-62.7	0	0	0	0	0	9.28074	0	0	0	0	0	0
-62.6	0	0	0	0	0	9.28074	0	0	0	0	0	0
-62.5	0	0	0	0	0	9.28074	0	0	0	0	0	0
-62.4	0	0	0	0	0	9.28074	0	0	0	0	0	0
-62.3	0	0	0	0	0	9.28074	0	0	0	0	0	0
-62.2	0	0	0	0	0	9.28074	0	0	0	0	0	0
-62.1	0	0	0	0	0	9.28074	0	0	0	0	0	0
-62	0	0	0	0	0	9.28074	0	0	0	0	0	0
-61.9	0	0	0	0	0	9.28074	0	0	0	0	0	0
-61.8	0	0	0	0	0	9.28074	0	0	0	0	0	0
-61.7	0	0	0	0	0	9.28074	0	0	0	0	0	0
-61.6	0	0	0	0	0	9.28074	0	0	0	0	0	0
-61.5	0	0	0	0	0	9.28074	0	0	0	0	0	0
-61.4	0	0	0	0	0	9.28074	0	0	0	0	0	0
-61.3	0	0	0	0	0	9.28074	0	0	0	0	0	0
-61.2	0	0	0	0	0	9.28074	0	0	0	0	0	0
-61.1	0	0	0	0	0	9.28074	0	0	0	0	0	0
-61	0	0	0	0	0	9.28074	0	0	0	0	0	0
-60.9	0	0	0	0	0	9.28074	0	0	0	0	0	0
-60.8	0	0	0	0	0	9.28074	0	0	0	0	0	0
-60.7	0	0	0	0	0	9.28074	0	0	0	0	0	0
-60.6	0	0	0	0	0	9.28074	0	0	0	0	0	0
-60.5	0	0	0	0	0	9.28074	0	0	0	0	0	0
-60.4	0	0	0	0	0	9.28074	0	0	0	0	0	0
-60.3	0	0	0	0	0	9.28074	0	0	0	0	0	0
-60.2	0	0	0	0	0	9.28074	0	0	0	0	0	0
-60.1	0	0	0	0	0	9.28074	0	0	0	0	0	0
-60	0	0	0	0	0	9.28074	0	0	0	0	0	0
-59.9	0	0	0	0	0	9.28074	0	0	0	0	0	0
-59.8	0	0	0	0	0	9.28074	0	0	0	0	0	0
-59.7	0	0	0	0	0	9.28074	0	0	0	0	0	0
-59.6	0	0	0	0	0	9.28074	0	0	0	0	0	0
-59.5	0	0	0	0	0	9.28074	0	0	0	0	0	0
-59.4	0	0	0	0	0	9.28074	0	0	0	0	0	0
-59.3	0	0	0	0	0	9.28074	0	0	0	0	0	0
-59.2	0	0	0	0	0	9.28074	0	0	0	0	0	0
-59.1	0	0	0	0	0	9.28074	0	0	0	0	0	0
-59	0	0	0	0	0	9.28074	0	0	0	0	0	0
-58.9	0	0	0	0	0	9.28074	0	0	0	0	0	0
-58.8	0	0	0	0	0	9.28074	0	0	0	0	0	0
-58.7	0	0	0	0	0	9.28074	0	0	0	0	0	0
-58.6	0	0	0	0	0	9.28074	0	0	0	0	0	0
-58.5	0	0	0	0	0	9.28074	0	0	0	0	0	0
-58.4	0	0	0	0	0	9.28074	0	0	0	0	0	0
-58.3	0	0	0	0	0	9.28074	0	0	0	0	0	0
-58.2	0	0	0	0	0	9.28074	0	0	0	0	0	0
-58.1	0	0	0	0	0	9.28074	0	0	0	0	0	0
-58	0	0	0	0	0	9.28074	0	0	0	0	0	0
-57.9	0	0	0	0	0	9.28074	0	0	0	0	0	0
-57.8	0	0	0	0	0	9.28074	0	0	0	0	0	0
-57.7	0	0	0	0	0	9.28074	0	0	0	0	0	0
-57.6	0	0	0	0	0	9.28074	0	0	0	0	0	0
-57.5	0	0	0	0	0	9.28074	0	0	0	0	0	0
-57.4	0	0	0	0	0	9.28074	0	0	0	0	0	0
-57.3	0	0	0	0	0	9.28074	0	0	0	0	0	0
-57.2	0	0	0	0	0	9.28074	0	0	0	0	0	0
-57.1	0	0	0	0	0	9.28074	0	0	0	0	0	0
-57	0	0	0	0	0	9.28074	0	0	0	0	0	0
-56.9	0	0	0	0	0	9.28074	0	0	0	0	0	0
-56.8	0	0	0	0	0	9.28074	0	0	0	0	0	0
-56.7	0	0	0	0	0	9.28074	0	0	0	0	0	0
-56.6	0	0	0	0	0	9.28074	0	0	0	0	0	0
-56.5	0	0	0	0	0	9.28074	0	0	0	0	0	0
-56.4	0	0	0	0	0	9.28074	0	0	0	0	0	0
-56.3	0	0	0	0	0	9.28074	0	0	0	0	0	0
-56.2	0	0	0	0	0	9.28074	0	0	0	0	0	0
-56.1	0	0	0	0	0	9.28074	0	0	0	0	0	0
-56	0	0	0	0	0	9.28074	0	0	0	0	0	0
-55.9	0	0	0	0	0	9.28074	0	0	0	0	0	0
-55.8	0	0	0	0	0	9.28074	0	0	0	0	0	0
-55.7	0	0	0	0	0	9.28074	0	0	0	0	0	0
-55.6	0	0	0	0	0	9.28074	0	0	0	0	0	0
-55.5	0	0	0	0	0	9.28074	0	0	0	0	0	0
-55.4	0	0	0	0	0	9.28074	0	0	0	0	0	0
-55.3	0	0	0	0	0	9.28074	0	0	0	0	0	0
-55.2	0	0	0	0	0	9.28074	0	0	0	0	0	0
-55.1	0	0	0	0	0	9.28074	0	0	0	0	0	0
-55	0	0	0	0	0	9.28074	0	0	0	0	0	0
[truncated: 35,550 more rows]

## Sheet: Figure 1E
	Mean spike frequency (Hz) at 60 dB background				Mean spike frequency (Hz) at 64 dB background				Mean spike frequency (Hz) at 70 dB background
[truncated: 682 more rows]

[truncated: 2 more sheets: Figure 1F, Figure_1E]
