# Supplementary material for: A Neural Mechanism for Time-Window Separation Resolves Ambiguity of Adaptive Coding
Source: PLoS Biol. 2015 Mar 11;13(3):e1002096. doi: 10.1371/journal.pbio.1002096 (PMC4356587; doi:10.1371/journal.pbio.1002096)
Supplement: S2 Data — (XLSX) [file pbio.1002096.s004.xlsx]

## Sheet: Fig. 2A
time (ms)	Spike frequency responses (Hz) of AN2 to current stimulus - experimental data
	Trial 1	Trial 2	Trial 3	Trial 4	Trial 5	Trial 6	Trial 7	Trial 8	Trial 9	Trial 10
-200	0	0	0	0	0	0	0	0	0	0
-199.9	0	0	0	0	0	0	0	0	0	0
-199.8	0	0	0	0	0	0	0	0	0	0
-199.7	0	0	0	0	0	0	0	0	0	0
-199.6	0	0	0	0	0	0	0	0	0	0
-199.5	0	0	0	0	0	0	0	0	0	0
-199.4	0	0	0	0	0	0	0	0	0	0
-199.3	0	0	0	0	0	0	0	0	0	0
-199.2	0	0	0	0	0	0	0	0	0	0
-199.1	0	0	0	0	0	0	0	0	0	0
-199	0	0	0	0	0	0	0	0	0	0
-198.9	0	0	0	0	0	0	0	0	0	0
-198.8	0	0	0	0	0	0	0	0	0	0
-198.7	0	0	0	0	0	0	0	0	0	0
-198.6	0	0	0	0	0	0	0	0	0	0
-198.5	0	0	0	0	0	0	0	0	0	0
-198.4	0	0	0	0	0	0	0	0	0	0
-198.3	0	0	0	0	0	0	0	0	0	0
-198.2	0	0	0	0	0	0	0	0	0	0
-198.1	0	0	0	0	0	0	0	0	0	0
-198	0	0	0	0	0	0	0	0	0	0
-197.9	0	0	0	0	0	0	0	0	5.7225	0
-197.8	0	0	0	0	0	0	0	0	5.7225	0
-197.7	0	0	0	0	0	0	0	0	5.7225	0
-197.6	0	0	0	0	0	0	0	0	5.7225	0
-197.5	0	0	0	0	0	0	0	0	5.7225	0
-197.4	0	0	0	0	0	0	0	0	5.7225	0
-197.3	0	0	0	0	0	0	0	0	5.7225	0
-197.2	0	0	0	0	0	0	0	0	5.7225	0
-197.1	0	0	0	0	0	0	0	0	5.7225	0
-197	0	0	0	0	0	0	0	0	5.7225	0
-196.9	0	0	0	0	0	0	0	0	5.7225	0
-196.8	0	0	0	0	0	0	0	0	5.7225	0
-196.7	0	0	0	0	0	0	0	0	5.7225	0
-196.6	0	0	0	0	0	0	0	0	5.7225	0
-196.5	0	0	0	0	0	0	0	0	5.7225	0
-196.4	0	0	0	0	0	0	0	0	5.7225	0
-196.3	0	0	0	0	0	0	0	0	5.7225	0
-196.2	0	0	0	0	0	0	0	0	5.7225	0
-196.1	0	0	0	0	0	0	0	0	5.7225	0
-196	0	0	0	0	0	0	0	0	5.7225	0
-195.9	0	0	0	0	0	0	0	0	5.7225	0
-195.8	0	0	0	0	0	0	0	0	5.7225	0
-195.7	0	0	0	0	0	0	0	0	5.7225	0
-195.6	0	0	0	0	0	0	0	0	5.7225	0
-195.5	0	0	0	0	0	0	0	0	5.7225	0
-195.4	0	0	0	0	0	0	0	0	5.7225	0
-195.3	0	0	0	0	0	0	0	0	5.7225	0
-195.2	0	0	0	0	0	0	0	0	5.7225	0
-195.1	0	0	0	0	0	0	0	0	5.7225	0
-195	0	0	0	0	0	0	0	0	5.7225	0
-194.9	0	0	0	0	0	0	0	0	5.7225	0
-194.8	0	0	0	0	0	0	0	0	5.7225	0
-194.7	0	0	0	0	0	0	0	0	5.7225	0
-194.6	0	0	0	0	0	0	0	0	5.7225	0
-194.5	0	0	0	0	0	0	0	0	5.7225	0
-194.4	0	0	0	0	0	0	0	0	5.7225	0
-194.3	0	0	0	0	0	0	0	0	5.7225	0
-194.2	0	0	0	0	0	0	0	0	5.7225	0
-194.1	0	0	0	0	0	0	0	0	5.7225	0
-194	0	0	0	0	6.759	0	0	0	5.7225	0
-193.9	0	0	0	0	6.759	0	0	0	5.7225	0
-193.8	0	0	0	0	6.759	0	0	0	5.7225	0
-193.7	0	0	0	0	6.759	0	0	0	5.7225	0
-193.6	0	0	0	0	6.759	0	0	0	5.7225	0
-193.5	0	0	0	0	6.759	0	0	0	5.7225	0
-193.4	0	0	0	0	6.759	0	0	0	5.7225	0
-193.3	0	0	0	0	6.759	0	0	0	5.7225	0
-193.2	0	0	0	0	6.759	0	0	0	5.7225	0
-193.1	0	0	0	0	6.759	0	0	0	5.7225	0
-193	0	0	0	0	6.759	0	0	0	5.7225	0
-192.9	0	0	0	0	6.759	0	0	0	5.7225	0
-192.8	0	0	0	0	6.759	0	0	0	5.7225	0
-192.7	0	0	0	0	6.759	0	0	0	5.7225	0
-192.6	0	0	0	0	6.759	0	0	0	5.7225	0
-192.5	0	0	0	0	6.759	0	0	0	5.7225	0
-192.4	0	0	0	0	6.759	0	0	0	5.7225	0
-192.3	0	0	0	0	6.759	0	0	0	5.7225	0
-192.2	0	0	0	0	6.759	0	0	0	5.7225	0
-192.1	0	0	0	0	6.759	0	0	0	5.7225	0
-192	0	0	0	0	6.759	0	0	0	5.7225	0
-191.9	0	0	0	0	6.759	0	0	0	5.7225	0
-191.8	0	0	0	0	6.759	0	0	0	5.7225	0
-191.7	0	0	0	0	6.759	0	0	0	5.7225	0
-191.6	0	0	0	0	6.759	0	0	0	5.7225	0
-191.5	0	0	0	0	6.759	0	0	0	5.7225	0
-191.4	0	0	0	0	6.759	0	0	0	5.7225	0
-191.3	0	0	0	0	6.759	0	0	0	5.7225	0
-191.2	0	0	0	0	6.759	0	0	0	5.7225	0
-191.1	0	0	0	0	6.759	0	0	0	5.7225	0
-191	0	0	0	0	6.759	0	0	0	5.7225	0
-190.9	0	0	0	0	6.759	0	0	0	5.7225	0
-190.8	0	0	0	0	6.759	0	0	0	5.7225	0
-190.7	0	0	0	0	6.759	0	0	0	5.7225	0
-190.6	0	0	0	0	6.759	0	0	0	5.7225	0
-190.5	0	0	0	0	6.759	0	0	0	5.7225	0
-190.4	0	0	0	0	6.759	0	0	0	5.7225	0
-190.3	0	0	0	0	6.759	0	0	0	5.7225	0
-190.2	0	0	0	0	6.759	0	0	0	5.7225	0
-190.1	0	0	0	0	6.759	0	0	0	5.7225	0
-190	0	0	0	0	6.759	0	0	0	5.7225	0
-189.9	0	0	0	0	6.759	0	0	0	5.7225	0
-189.8	0	0	0	0	6.759	0	0	0	5.7225	0
-189.7	0	0	0	0	6.759	0	0	0	5.7225	0
-189.6	0	0	0	0	6.759	0	0	0	5.7225	0
-189.5	0	0	0	0	6.759	0	0	0	5.7225	0
-189.4	0	0	0	0	6.759	0	0	0	5.7225	0
-189.3	0	0	0	0	6.759	0	0	0	5.7225	0
-189.2	0	0	0	0	6.759	0	0	0	5.7225	0
-189.1	0	0	0	0	6.759	0	0	0	5.7225	0
-189	0	0	0	0	6.759	0	0	0	5.7225	0
-188.9	0	0	0	0	6.759	0	0	0	5.7225	0
-188.8	0	0	0	0	6.759	0	0	0	5.7225	0
-188.7	0	0	0	0	6.759	0	0	0	5.7225	0
-188.6	0	0	0	0	6.759	0	0	0	5.7225	0
-188.5	0	0	0	0	6.759	0	0	0	5.7225	0
-188.4	0	0	0	0	6.759	0	0	0	5.7225	0
-188.3	0	0	0	0	6.759	0	0	0	5.7225	0
-188.2	0	0	0	0	6.759	0	0	0	5.7225	0
-188.1	0	0	0	0	6.759	0	0	0	5.7225	0
-188	0	0	0	0	6.759	0	0	0	5.7225	0
-187.9	0	0	0	0	6.759	0	0	0	5.7225	0
-187.8	0	0	0	0	6.759	0	0	0	5.7225	0
-187.7	0	0	0	0	6.759	0	0	0	5.7225	0
-187.6	0	0	0	0	6.759	0	0	0	5.7225	0
-187.5	0	0	0	0	6.759	0	0	0	5.7225	0
-187.4	0	0	0	0	6.759	0	0	0	5.7225	0
-187.3	0	0	0	0	6.759	0	0	0	5.7225	0
-187.2	0	0	0	0	6.759	0	0	0	5.7225	0
-187.1	0	0	0	0	6.759	0	0	0	5.7225	0
-187	0	0	0	0	6.759	0	0	0	5.7225	0
-186.9	0	0	0	0	6.759	0	0	0	5.7225	0
-186.8	0	0	0	0	6.759	0	0	0	5.7225	0
-186.7	0	0	0	0	6.759	0	0	0	5.7225	0
-186.6	0	0	0	0	6.759	0	0	0	5.7225	0
-186.5	0	0	0	0	6.759	0	0	0	5.7225	0
-186.4	0	0	0	0	6.759	0	0	0	5.7225	0
-186.3	0	0	0	0	6.759	0	0	0	5.7225	0
-186.2	0	0	0	0	6.759	0	0	0	5.7225	0
-186.1	0	0	0	0	6.759	0	0	0	5.7225	0
-186	0	0	0	0	6.759	0	0	0	5.7225	0
-185.9	0	0	0	0	6.759	0	0	0	5.7225	0
-185.8	0	0	0	0	6.759	0	0	0	5.7225	0
-185.7	0	0	0	0	6.759	0	0	0	5.7225	0
-185.6	0	0	0	0	6.759	0	0	0	5.7225	0
-185.5	0	0	0	0	6.759	0	0	0	5.7225	0
-185.4	0	0	0	0	6.759	0	0	0	5.7225	0
-185.3	0	0	0	0	6.759	0	0	0	5.7225	0
-185.2	0	0	0	0	6.759	0	0	0	5.7225	0
-185.1	0	0	0	0	6.759	0	0	0	5.7225	0
-185	0	0	0	0	6.759	0	0	0	5.7225	0
-184.9	0	0	0	0	6.759	0	0	0	5.7225	0
-184.8	0	0	0	0	6.759	0	0	0	5.7225	0
-184.7	0	0	0	0	6.759	0	0	0	5.7225	0
-184.6	0	0	0	0	6.759	0	0	0	5.7225	0
-184.5	0	0	0	0	6.759	0	0	0	5.7225	0
-184.4	0	0	0	0	6.759	0	0	0	5.7225	0
-184.3	0	0	0	0	6.759	0	0	0	5.7225	0
-184.2	0	0	0	0	6.759	0	0	0	5.7225	0
-184.1	0	0	0	0	6.759	0	0	0	5.7225	0
-184	0	0	0	0	6.759	0	0	0	5.7225	0
-183.9	0	0	0	0	6.759	0	0	0	5.7225	0
-183.8	0	0	0	0	6.759	0	0	0	5.7225	0
-183.7	0	0	0	0	6.759	0	0	0	5.7225	0
-183.6	0	0	0	0	6.759	0	0	0	5.7225	0
-183.5	0	0	0	0	6.759	0	0	0	5.7225	0
-183.4	0	0	0	0	6.759	0	0	0	5.7225	0
-183.3	0	0	0	0	6.759	0	0	0	5.7225	0
-183.2	0	0	0	0	6.759	0	0	0	5.7225	0
-183.1	0	0	0	0	6.759	0	0	0	5.7225	0
-183	0	0	0	0	6.759	0	0	0	5.7225	0
-182.9	0	0	0	0	6.759	0	0	0	5.7225	0
-182.8	0	0	0	0	6.759	0	0	0	5.7225	0
-182.7	0	0	0	0	6.759	0	0	0	5.7225	0
-182.6	0	0	0	0	6.759	0	0	0	5.7225	0
-182.5	0	0	0	0	6.759	0	0	0	5.7225	0
-182.4	0	0	0	0	6.759	0	0	0	5.7225	0
-182.3	0	0	0	0	6.759	0	0	0	5.7225	0
-182.2	0	0	0	0	6.759	0	0	0	5.7225	0
-182.1	0	0	0	0	6.759	0	0	0	5.7225	0
-182	0	0	0	0	6.759	0	0	0	5.7225	0
-181.9	0	0	0	0	6.759	0	0	0	5.7225	0
-181.8	0	0	0	0	6.759	0	0	0	5.7225	0
-181.7	0	0	0	0	6.759	0	0	0	5.7225	0
-181.6	0	0	0	0	6.759	0	0	0	5.7225	0
-181.5	0	0	0	0	6.759	0	0	0	5.7225	0
-181.4	0	0	0	0	6.759	0	0	0	5.7225	0
-181.3	0	0	0	0	6.759	0	0	0	5.7225	0
-181.2	0	0	0	0	6.759	0	0	0	5.7225	0
-181.1	0	0	0	0	6.759	0	0	0	5.7225	0
-181	0	0	0	0	6.759	0	0	0	5.7225	0
-180.9	0	0	0	0	6.759	0	0	0	5.7225	0
-180.8	0	0	0	0	6.759	0	0	0	5.7225	0
-180.7	0	0	0	0	6.759	0	0	0	5.7225	0
-180.6	0	0	0	0	6.759	0	0	0	5.7225	0
-180.5	0	0	0	0	6.759	0	0	0	5.7225	0
-180.4	0	0	0	0	6.759	0	0	0	5.7225	0
-180.3	0	0	0	0	6.759	0	0	0	5.7225	0
-180.2	0	0	0	0	6.759	0	0	0	5.7225	0
-180.1	0	0	0	0	6.759	0	0	0	5.7225	0
-180	0	0	0	0	6.759	0	0	0	5.7225	0
-179.9	0	0	0	0	6.759	0	0	0	5.7225	0
-179.8	0	0	0	0	6.759	0	0	0	5.7225	0
-179.7	0	0	0	0	6.759	0	0	0	5.7225	0
-179.6	0	0	0	0	6.759	0	0	0	5.7225	0
-179.5	0	0	0	0	6.759	0	0	0	5.7225	0
-179.4	0	0	0	0	6.759	0	0	0	5.7225	0
-179.3	0	0	0	0	6.759	0	0	0	5.7225	0
-179.2	0	0	0	0	6.759	0	0	0	5.7225	0
-179.1	0	0	0	0	6.759	0	0	0	5.7225	0
-179	0	0	0	0	6.759	0	0	0	5.7225	0
-178.9	0	0	0	0	6.759	0	0	0	5.7225	0
-178.8	0	0	0	0	6.759	0	0	0	5.7225	0
-178.7	0	0	0	0	6.759	0	0	0	5.7225	0
-178.6	0	0	0	0	6.759	0	0	0	5.7225	0
-178.5	0	0	0	0	6.759	0	0	0	5.7225	0
-178.4	0	0	0	0	6.759	0	0	0	5.7225	0
-178.3	0	0	0	0	6.759	0	0	0	5.7225	0
-178.2	0	0	0	0	6.759	0	0	0	5.7225	0
-178.1	0	0	0	0	6.759	0	0	0	5.7225	0
-178	0	0	0	0	6.759	0	0	0	5.7225	0
-177.9	0	0	0	0	6.759	0	0	0	5.7225	0
-177.8	0	0	0	0	6.759	0	0	0	5.7225	0
-177.7	0	0	0	0	6.759	0	0	0	5.7225	0
-177.6	0	0	0	0	6.759	0	0	0	5.7225	0
-177.5	0	0	0	0	6.759	0	0	0	5.7225	0
-177.4	0	0	0	0	6.759	0	0	0	5.7225	0
-177.3	0	0	0	0	6.759	0	0	0	5.7225	0
-177.2	0	0	0	0	6.759	0	0	0	5.7225	0
-177.1	0	0	0	0	6.759	0	0	0	5.7225	0
-177	0	0	0	0	6.759	0	0	0	5.7225	0
-176.9	0	0	0	0	6.759	0	0	0	5.7225	0
-176.8	0	0	0	0	6.759	0	0	0	5.7225	0
-176.7	0	0	0	0	6.759	0	0	0	5.7225	0
-176.6	0	0	0	0	6.759	0	0	0	5.7225	0
-176.5	0	0	0	0	6.759	0	0	0	5.7225	0
-176.4	0	0	0	0	6.759	0	0	0	5.7225	0
-176.3	0	0	0	0	6.759	0	0	0	5.7225	0
-176.2	0	0	0	0	6.759	0	0	0	5.7225	0
-176.1	0	0	0	0	6.759	0	0	0	5.7225	0
-176	0	0	0	0	6.759	0	0	0	5.7225	0
-175.9	0	0	0	0	6.759	0	0	0	5.7225	0
-175.8	0	0	0	0	6.759	0	0	0	5.7225	0
-175.7	0	0	0	0	6.759	0	0	0	5.7225	0
-175.6	0	0	0	0	6.759	0	0	0	5.7225	0
-175.5	0	0	0	0	6.759	0	0	0	5.7225	0
-175.4	0	0	0	0	6.759	0	0	0	5.7225	0
-175.3	0	0	0	0	6.759	0	0	0	5.7225	0
-175.2	0	0	0	0	6.759	0	0	0	5.7225	0
-175.1	0	0	0	0	6.759	0	0	0	5.7225	0
-175	0	0	0	0	6.759	0	0	0	5.7225	0
-174.9	0	0	0	0	6.759	0	0	0	5.7225	0
-174.8	0	0	0	0	6.759	0	0	0	5.7225	0
-174.7	0	0	0	0	6.759	0	0	0	5.7225	0
-174.6	0	0	0	0	6.759	0	0	0	5.7225	0
-174.5	0	0	0	0	6.759	0	0	0	5.7225	0
-174.4	0	0	0	0	6.759	0	0	0	5.7225	0
-174.3	0	0	0	0	6.759	0	0	0	5.7225	0
-174.2	0	0	0	0	6.759	0	0	0	5.7225	0
-174.1	0	0	0	0	6.759	0	0	0	5.7225	0
-174	0	0	0	0	6.759	0	0	0	5.7225	0
-173.9	0	0	0	0	6.759	0	0	0	5.7225	0
-173.8	0	0	0	0	6.759	0	0	0	5.7225	5.8292
-173.7	0	0	0	0	6.759	0	0	0	5.7225	5.8292
-173.6	0	0	0	0	6.759	0	0	0	5.7225	5.8292
-173.5	0	0	0	0	6.759	0	0	0	5.7225	5.8292
-173.4	0	0	0	0	6.759	0	0	0	5.7225	5.8292
-173.3	0	0	0	0	6.759	0	0	0	5.7225	5.8292
-173.2	0	0	0	0	6.759	0	0	0	5.7225	5.8292
-173.1	0	0	0	0	6.759	0	0	0	5.7225	5.8292
-173	0	0	0	0	6.759	0	0	0	5.7225	5.8292
-172.9	0	0	0	0	6.759	0	0	0	5.7225	5.8292
-172.8	0	0	0	0	6.759	0	0	0	5.7225	5.8292
-172.7	0	0	0	0	6.759	0	0	0	5.7225	5.8292
-172.6	0	0	0	0	6.759	0	0	0	5.7225	5.8292
-172.5	0	0	0	0	6.759	0	0	0	5.7225	5.8292
-172.4	0	0	0	0	6.759	0	0	0	5.7225	5.8292
-172.3	0	0	0	0	6.759	0	0	0	5.7225	5.8292
-172.2	0	0	0	0	6.759	0	0	0	5.7225	5.8292
-172.1	0	0	0	0	6.759	0	0	0	5.7225	5.8292
-172	0	0	0	0	6.759	0	0	0	5.7225	5.8292
-171.9	0	0	0	0	6.759	0	0	0	5.7225	5.8292
-171.8	0	0	0	0	6.759	0	0	0	5.7225	5.8292
-171.7	0	0	0	0	6.759	0	0	0	5.7225	5.8292
-171.6	0	0	0	0	6.759	0	0	0	5.7225	5.8292
-171.5	0	0	0	0	6.759	0	0	0	5.7225	5.8292
-171.4	0	0	0	0	6.759	0	0	0	5.7225	5.8292
-171.3	0	0	0	0	6.759	0	0	0	5.7225	5.8292
-171.2	0	0	0	0	6.759	0	0	0	5.7225	5.8292
-171.1	0	0	0	0	6.759	0	0	0	5.7225	5.8292
-171	0	0	0	0	6.759	0	0	0	5.7225	5.8292
-170.9	0	0	0	0	6.759	0	0	0	5.7225	5.8292
-170.8	0	0	0	0	6.759	0	0	0	5.7225	5.8292
-170.7	0	0	0	0	6.759	0	0	0	5.7225	5.8292
-170.6	0	0	0	0	6.759	0	0	0	5.7225	5.8292
-170.5	0	0	0	0	6.759	0	0	0	5.7225	5.8292
-170.4	0	0	0	0	6.759	0	0	0	5.7225	5.8292
-170.3	0	0	0	0	6.759	0	0	0	5.7225	5.8292
-170.2	0	0	0	0	6.759	0	0	0	5.7225	5.8292
-170.1	0	0	0	0	6.759	0	0	0	5.7225	5.8292
-170	0	0	0	0	6.759	0	0	0	5.7225	5.8292
-169.9	0	0	0	0	6.759	0	0	0	5.7225	5.8292
-169.8	0	0	0	0	6.759	0	0	0	5.7225	5.8292
-169.7	0	0	0	0	6.759	0	0	0	5.7225	5.8292
-169.6	0	0	0	0	6.759	0	0	0	5.7225	5.8292
-169.5	0	0	0	0	6.759	0	0	0	5.7225	5.8292
-169.4	0	0	0	0	6.759	0	0	0	5.7225	5.8292
-169.3	0	0	0	0	6.759	0	0	0	5.7225	5.8292
-169.2	0	0	0	0	6.759	0	0	0	5.7225	5.8292
-169.1	0	0	0	0	6.759	0	0	0	5.7225	5.8292
-169	0	0	0	0	6.759	0	0	0	5.7225	5.8292
-168.9	0	0	0	0	6.759	0	0	0	5.7225	5.8292
-168.8	0	0	0	0	6.759	0	0	0	5.7225	5.8292
-168.7	0	0	0	0	6.759	0	0	0	5.7225	5.8292
-168.6	0	0	0	0	6.759	0	0	0	5.7225	5.8292
-168.5	0	0	0	0	6.759	0	0	0	5.7225	5.8292
-168.4	0	0	0	0	6.759	0	0	0	5.7225	5.8292
-168.3	0	0	0	0	6.759	0	0	0	5.7225	5.8292
-168.2	0	0	0	0	6.759	0	0	0	5.7225	5.8292
-168.1	0	0	0	0	6.759	0	0	0	5.7225	5.8292
-168	0	0	0	0	6.759	0	0	0	5.7225	5.8292
-167.9	0	0	0	0	6.759	0	0	0	5.7225	5.8292
-167.8	0	0	0	0	6.759	0	0	0	5.7225	5.8292
-167.7	0	0	0	0	6.759	0	0	0	5.7225	5.8292
-167.6	0	0	0	0	6.759	0	0	0	5.7225	5.8292
-167.5	0	0	0	0	6.759	0	0	0	5.7225	5.8292
-167.4	0	0	0	0	6.759	0	0	0	5.7225	5.8292
-167.3	0	0	0	0	6.759	0	0	0	5.7225	5.8292
-167.2	0	0	0	0	6.759	0	0	0	5.7225	5.8292
-167.1	0	0	0	0	6.759	0	0	0	5.7225	5.8292
-167	0	0	0	0	6.759	0	0	0	5.7225	5.8292
-166.9	0	0	0	0	6.759	0	0	0	5.7225	5.8292
-166.8	0	0	0	0	6.759	0	0	0	5.7225	5.8292
-166.7	0	0	0	0	6.759	0	0	0	5.7225	5.8292
-166.6	0	0	0	0	6.759	0	0	0	5.7225	5.8292
-166.5	0	0	0	0	6.759	0	0	0	5.7225	5.8292
-166.4	0	0	0	0	6.759	0	0	0	5.7225	5.8292
-166.3	0	0	0	0	6.759	0	0	0	5.7225	5.8292
-166.2	0	0	0	0	6.759	0	0	0	5.7225	5.8292
-166.1	0	0	0	0	6.759	0	0	0	5.7225	5.8292
-166	0	0	0	0	6.759	0	0	0	5.7225	5.8292
-165.9	0	0	0	0	6.759	0	0	0	5.7225	5.8292
-165.8	0	0	0	0	6.759	0	0	0	5.7225	5.8292
-165.7	0	0	0	0	6.759	0	0	6.398	5.7225	5.8292
-165.6	0	0	0	0	6.759	0	0	6.398	5.7225	5.8292
-165.5	0	0	0	0	6.759	0	0	6.398	5.7225	5.8292
-165.4	0	0	0	0	6.759	0	0	6.398	5.7225	5.8292
-165.3	0	0	0	0	6.759	0	0	6.398	5.7225	5.8292
-165.2	0	0	0	0	6.759	0	0	6.398	5.7225	5.8292
-165.1	0	0	0	0	6.759	0	0	6.398	5.7225	5.8292
-165	0	0	0	0	6.759	0	0	6.398	5.7225	5.8292
-164.9	0	0	0	0	6.759	0	0	6.398	5.7225	5.8292
-164.8	0	0	0	0	6.759	0	0	6.398	5.7225	5.8292
-164.7	0	0	0	0	6.759	0	0	6.398	5.7225	5.8292
-164.6	0	0	0	0	6.759	0	0	6.398	5.7225	5.8292
-164.5	0	0	0	0	6.759	0	0	6.398	5.7225	5.8292
-164.4	0	0	0	0	6.759	0	0	6.398	5.7225	5.8292
-164.3	0	0	0	0	6.759	0	0	6.398	5.7225	5.8292
-164.2	0	0	0	0	6.759	0	0	6.398	5.7225	5.8292
-164.1	0	0	0	0	6.759	0	0	6.398	5.7225	5.8292
-164	0	0	0	0	6.759	0	0	6.398	5.7225	5.8292
-163.9	0	0	0	0	6.759	0	0	6.398	5.7225	5.8292
-163.8	0	0	0	0	6.759	0	0	6.398	5.7225	5.8292
-163.7	0	0	0	0	6.759	0	0	6.398	5.7225	5.8292
-163.6	0	0	0	0	6.759	0	0	6.398	5.7225	5.8292
-163.5	0	0	0	0	6.759	0	0	6.398	5.7225	5.8292
-163.4	0	0	0	0	6.759	0	0	6.398	5.7225	5.8292
-163.3	0	0	0	0	6.759	0	0	6.398	5.7225	5.8292
-163.2	0	0	0	0	6.759	0	0	6.398	5.7225	5.8292
-163.1	0	0	0	0	6.759	0	0	6.398	5.7225	5.8292
-163	0	0	0	0	6.759	0	0	6.398	5.7225	5.8292
-162.9	0	0	0	0	6.759	0	0	6.398	5.7225	5.8292
-162.8	0	0	0	0	6.759	0	0	6.398	5.7225	5.8292
-162.7	0	0	0	0	6.759	0	0	6.398	5.7225	5.8292
-162.6	0	0	0	0	6.759	0	0	6.398	5.7225	5.8292
-162.5	0	0	0	0	6.759	0	0	6.398	5.7225	5.8292
-162.4	0	0	0	0	6.759	0	0	6.398	5.7225	5.8292
-162.3	0	0	0	0	6.759	0	0	6.398	5.7225	5.8292
-162.2	0	0	0	0	6.759	0	0	6.398	5.7225	5.8292
-162.1	0	0	0	0	6.759	0	0	6.398	5.7225	5.8292
-162	0	0	0	0	6.759	0	0	6.398	5.7225	5.8292
-161.9	0	0	0	0	6.759	0	0	6.398	5.7225	5.8292
-161.8	0	0	0	0	6.759	0	0	6.398	5.7225	5.8292
-161.7	0	0	0	0	6.759	0	0	6.398	5.7225	5.8292
-161.6	0	0	0	0	6.759	0	0	6.398	5.7225	5.8292
-161.5	0	0	0	0	6.759	0	0	6.398	5.7225	5.8292
-161.4	0	0	0	0	6.759	0	0	6.398	5.7225	5.8292
-161.3	0	0	0	0	6.759	0	0	6.398	5.7225	5.8292
-161.2	0	0	0	0	6.759	0	0	6.398	5.7225	5.8292
-161.1	0	0	0	0	6.759	0	0	6.398	5.7225	5.8292
-161	0	0	0	0	6.759	0	0	6.398	5.7225	5.8292
-160.9	0	0	0	0	6.759	0	0	6.398	5.7225	5.8292
-160.8	0	0	0	0	6.759	0	0	6.398	5.7225	5.8292
-160.7	0	0	0	0	6.759	0	0	6.398	5.7225	5.8292
-160.6	0	0	0	0	6.759	0	0	6.398	5.7225	5.8292
-160.5	0	0	0	0	6.759	0	0	6.398	5.7225	5.8292
-160.4	0	0	0	0	6.759	0	0	6.398	5.7225	5.8292
-160.3	0	0	0	0	6.759	0	0	6.398	5.7225	5.8292
-160.2	0	0	0	0	6.759	0	0	6.398	5.7225	5.8292
-160.1	0	0	0	0	6.759	0	0	6.398	5.7225	5.8292
-160	0	0	0	0	6.759	0	0	6.398	5.7225	5.8292
-159.9	0	0	0	0	6.759	0	0	6.398	5.7225	5.8292
-159.8	0	0	0	0	6.759	0	0	6.398	5.7225	5.8292
-159.7	0	0	0	0	6.759	0	0	6.398	5.7225	5.8292
-159.6	0	0	0	0	6.759	0	0	6.398	5.7225	5.8292
-159.5	0	0	0	0	6.759	0	0	6.398	5.7225	5.8292
-159.4	0	0	0	0	6.759	0	0	6.398	5.7225	5.8292
-159.3	0	0	0	0	6.759	0	0	6.398	5.7225	5.8292
-159.2	0	0	0	0	6.759	0	0	6.398	5.7225	5.8292
-159.1	0	0	0	0	6.759	0	0	6.398	5.7225	5.8292
-159	0	0	0	0	6.759	0	0	6.398	5.7225	5.8292
-158.9	0	0	0	0	6.759	0	0	6.398	5.7225	5.8292
-158.8	0	0	0	0	6.759	0	0	6.398	5.7225	5.8292
-158.7	0	0	0	0	6.759	0	0	6.398	5.7225	5.8292
-158.6	0	0	0	0	6.759	0	0	6.398	5.7225	5.8292
-158.5	0	0	0	0	6.759	0	0	6.398	5.7225	5.8292
-158.4	0	0	0	0	6.759	0	0	6.398	5.7225	5.8292
-158.3	0	0	0	0	6.759	0	0	6.398	5.7225	5.8292
-158.2	0	0	0	0	6.759	0	0	6.398	5.7225	5.8292
-158.1	0	0	0	0	6.759	0	0	6.398	5.7225	5.8292
-158	0	0	0	0	6.759	0	0	6.398	5.7225	5.8292
-157.9	0	0	0	0	6.759	0	0	6.398	5.7225	5.8292
-157.8	0	0	0	0	6.759	0	0	6.398	5.7225	5.8292
-157.7	0	0	0	0	6.759	0	0	6.398	5.7225	5.8292
-157.6	0	0	0	0	6.759	0	0	6.398	5.7225	5.8292
-157.5	0	0	0	0	6.759	0	0	6.398	5.7225	5.8292
-157.4	0	0	0	0	6.759	0	0	6.398	5.7225	5.8292
-157.3	0	0	0	0	6.759	0	0	6.398	5.7225	5.8292
-157.2	0	0	0	0	6.759	0	0	6.398	5.7225	5.8292
-157.1	0	0	0	0	6.759	0	0	6.398	5.7225	5.8292
-157	0	0	0	0	6.759	0	0	6.398	5.7225	5.8292
-156.9	0	0	0	0	6.759	0	0	6.398	5.7225	5.8292
-156.8	0	0	0	0	6.759	0	0	6.398	5.7225	5.8292
-156.7	0	0	0	0	6.759	0	0	6.398	5.7225	5.8292
-156.6	0	0	0	0	6.759	0	0	6.398	5.7225	5.8292
-156.5	0	0	0	0	6.759	0	0	6.398	5.7225	5.8292
-156.4	0	0	0	0	6.759	0	0	6.398	5.7225	5.8292
-156.3	0	0	0	0	6.759	0	0	6.398	5.7225	5.8292
-156.2	0	0	0	0	6.759	0	0	6.398	5.7225	5.8292
-156.1	0	0	0	0	6.759	0	0	6.398	5.7225	5.8292
-156	0	0	0	0	6.759	0	0	6.398	5.7225	5.8292
-155.9	0	0	0	0	6.759	0	0	6.398	5.7225	5.8292
-155.8	0	0	0	0	6.759	0	0	6.398	5.7225	5.8292
-155.7	0	0	0	0	6.759	0	0	6.398	5.7225	5.8292
-155.6	0	0	0	0	6.759	0	0	6.398	5.7225	5.8292
-155.5	0	0	0	0	6.759	0	0	6.398	5.7225	5.8292
-155.4	0	0	0	0	6.759	0	0	6.398	5.7225	5.8292
-155.3	0	0	0	0	6.759	0	0	6.398	5.7225	5.8292
-155.2	0	0	0	0	6.759	0	0	6.398	5.7225	5.8292
-155.1	0	0	0	0	6.759	0	0	6.398	5.7225	5.8292
-155	0	0	0	0	6.759	0	0	6.398	5.7225	5.8292
-154.9	0	0	0	0	6.759	0	0	6.398	5.7225	5.8292
-154.8	0	0	0	0	6.759	0	0	6.398	5.7225	5.8292
-154.7	0	0	0	0	6.759	0	0	6.398	5.7225	5.8292
-154.6	0	0	0	0	6.759	0	0	6.398	5.7225	5.8292
-154.5	0	0	0	0	6.759	0	0	6.398	5.7225	5.8292
-154.4	0	0	0	0	6.759	0	0	6.398	5.7225	5.8292
-154.3	0	0	0	0	6.759	0	0	6.398	5.7225	5.8292
-154.2	0	0	0	0	6.759	0	0	6.398	5.7225	5.8292
-154.1	0	0	0	0	6.759	0	0	6.398	5.7225	5.8292
-154	0	0	0	0	6.759	0	0	6.398	5.7225	5.8292
-153.9	0	0	0	0	6.759	0	0	6.398	5.7225	5.8292
-153.8	0	0	0	0	6.759	0	0	6.398	5.7225	5.8292
-153.7	0	0	0	0	6.759	0	0	6.398	5.7225	5.8292
-153.6	0	0	0	0	6.759	0	0	6.398	5.7225	5.8292
-153.5	0	0	0	0	6.759	0	0	6.398	5.7225	5.8292
-153.4	0	0	0	0	6.759	0	0	6.398	5.7225	5.8292
-153.3	0	0	0	0	6.759	0	0	6.398	5.7225	5.8292
-153.2	0	0	0	0	6.759	0	0	6.398	5.7225	5.8292
-153.1	0	0	0	0	6.759	0	0	6.398	5.7225	5.8292
-153	0	0	0	0	6.759	0	0	6.398	5.7225	5.8292
-152.9	0	0	0	0	6.759	0	0	6.398	5.7225	5.8292
-152.8	0	0	0	0	6.759	0	0	6.398	5.7225	5.8292
-152.7	0	0	0	0	6.759	0	0	6.398	5.7225	5.8292
-152.6	0	0	0	0	6.759	0	0	6.398	5.7225	5.8292
-152.5	0	0	0	0	6.759	0	0	6.398	5.7225	5.8292
-152.4	0	0	0	0	6.759	0	0	6.398	5.7225	5.8292
-152.3	0	0	0	0	6.759	0	0	6.398	5.7225	5.8292
-152.2	0	0	0	0	6.759	0	0	6.398	5.7225	5.8292
-152.1	0	0	0	0	6.759	0	0	6.398	5.7225	5.8292
-152	0	0	0	0	6.759	0	0	6.398	5.7225	5.8292
-151.9	0	0	0	0	6.759	0	0	6.398	5.7225	5.8292
-151.8	0	0	0	0	6.759	0	0	6.398	5.7225	5.8292
-151.7	0	0	0	0	6.759	0	0	6.398	5.7225	5.8292
-151.6	0	0	0	0	6.759	0	0	6.398	5.7225	5.8292
-151.5	0	0	0	0	6.759	0	0	6.398	5.7225	5.8292
-151.4	0	0	0	0	6.759	0	0	6.398	5.7225	5.8292
-151.3	0	0	0	0	6.759	0	0	6.398	5.7225	5.8292
-151.2	0	0	0	0	6.759	0	0	6.398	5.7225	5.8292
-151.1	0	0	0	0	6.759	0	0	6.398	5.7225	5.8292
-151	0	0	0	6.5257	6.759	0	0	6.398	5.7225	5.8292
-150.9	0	0	0	6.5257	6.759	0	0	6.398	5.7225	5.8292
-150.8	0	0	0	6.5257	6.759	0	0	6.398	5.7225	5.8292
-150.7	0	0	0	6.5257	6.759	0	0	6.398	5.7225	5.8292
-150.6	0	0	0	6.5257	6.759	0	0	6.398	5.7225	5.8292
-150.5	0	0	0	6.5257	6.759	0	0	6.398	5.7225	5.8292
-150.4	0	0	0	6.5257	6.759	0	0	6.398	5.7225	5.8292
-150.3	0	0	0	6.5257	6.759	0	0	6.398	5.7225	5.8292
-150.2	0	0	0	6.5257	6.759	0	0	6.398	5.7225	5.8292
-150.1	0	0	0	6.5257	6.759	0	0	6.398	5.7225	5.8292
-150	0	0	0	6.5257	6.759	0	0	6.398	5.7225	5.8292
-149.9	0	0	0	6.5257	6.759	0	0	6.398	5.7225	5.8292
-149.8	0	0	0	6.5257	6.759	0	0	6.398	5.7225	5.8292
-149.7	0	0	0	6.5257	6.759	0	0	6.398	5.7225	5.8292
-149.6	0	0	0	6.5257	6.759	0	0	6.398	5.7225	5.8292
-149.5	0	0	0	6.5257	6.759	0	0	6.398	5.7225	5.8292
-149.4	0	0	0	6.5257	6.759	0	0	6.398	5.7225	5.8292
-149.3	0	0	0	6.5257	6.759	0	0	6.398	5.7225	5.8292
-149.2	0	0	0	6.5257	6.759	0	0	6.398	5.7225	5.8292
-149.1	0	0	0	6.5257	6.759	0	0	6.398	5.7225	5.8292
-149	0	0	0	6.5257	6.759	0	0	6.398	5.7225	5.8292
-148.9	0	0	0	6.5257	6.759	0	0	6.398	5.7225	5.8292
-148.8	0	0	0	6.5257	6.759	0	0	6.398	5.7225	5.8292
-148.7	0	0	0	6.5257	6.759	0	0	6.398	5.7225	5.8292
-148.6	0	0	0	6.5257	6.759	0	0	6.398	5.7225	5.8292
-148.5	0	0	0	6.5257	6.759	0	0	6.398	5.7225	5.8292
-148.4	0	0	0	6.5257	6.759	0	0	6.398	5.7225	5.8292
-148.3	0	0	0	6.5257	6.759	0	0	6.398	5.7225	5.8292
-148.2	0	0	0	6.5257	6.759	0	0	6.398	5.7225	5.8292
-148.1	0	0	0	6.5257	6.759	0	0	6.398	5.7225	5.8292
-148	0	0	0	6.5257	6.759	6.652	0	6.398	5.7225	5.8292
-147.9	0	0	0	6.5257	6.759	6.652	0	6.398	5.7225	5.8292
-147.8	0	0	0	6.5257	6.759	6.652	0	6.398	5.7225	5.8292
-147.7	0	0	0	6.5257	6.759	6.652	0	6.398	5.7225	5.8292
-147.6	0	0	0	6.5257	6.759	6.652	0	6.398	5.7225	5.8292
-147.5	0	0	0	6.5257	6.759	6.652	0	6.398	5.7225	5.8292
-147.4	0	0	0	6.5257	6.759	6.652	0	6.398	5.7225	5.8292
-147.3	0	0	0	6.5257	6.759	6.652	0	6.398	5.7225	5.8292
-147.2	0	0	0	6.5257	6.759	6.652	0	6.398	5.7225	5.8292
-147.1	0	0	0	6.5257	6.759	6.652	0	6.398	5.7225	5.8292
-147	0	0	0	6.5257	6.759	6.652	0	6.398	5.7225	5.8292
-146.9	0	0	0	6.5257	6.759	6.652	0	6.398	5.7225	5.8292
-146.8	0	0	0	6.5257	6.759	6.652	0	6.398	5.7225	5.8292
-146.7	0	0	0	6.5257	6.759	6.652	0	6.398	5.7225	5.8292
-146.6	0	0	0	6.5257	6.759	6.652	0	6.398	5.7225	5.8292
-146.5	0	0	0	6.5257	6.759	6.652	0	6.398	5.7225	5.8292
-146.4	0	0	0	6.5257	6.759	6.652	0	6.398	5.7225	5.8292
-146.3	0	0	0	6.5257	6.759	6.652	0	6.398	5.7225	5.8292
-146.2	0	0	0	6.5257	6.759	6.652	0	6.398	5.7225	5.8292
-146.1	0	0	0	6.5257	6.759	6.652	0	6.398	5.7225	5.8292
-146	0	0	0	6.5257	6.759	6.652	0	6.398	5.7225	5.8292
-145.9	0	0	0	6.5257	6.759	6.652	0	6.398	5.7225	5.8292
-145.8	0	0	0	6.5257	6.759	6.652	0	6.398	5.7225	5.8292
-145.7	0	0	0	6.5257	6.759	6.652	0	6.398	5.7225	5.8292
-145.6	0	0	0	6.5257	6.759	6.652	0	6.398	5.7225	5.8292
-145.5	0	0	0	6.5257	6.759	6.652	0	6.398	5.7225	5.8292
-145.4	0	0	0	6.5257	6.759	6.652	0	6.398	5.7225	5.8292
-145.3	0	0	0	6.5257	6.759	6.652	0	6.398	5.7225	5.8292
-145.2	0	0	0	6.5257	6.759	6.652	0	6.398	5.7225	5.8292
-145.1	0	0	0	6.5257	6.759	6.652	0	6.398	5.7225	5.8292
-145	0	0	0	6.5257	6.759	6.652	0	6.398	5.7225	5.8292
-144.9	0	0	0	6.5257	6.759	6.652	0	6.398	5.7225	5.8292
-144.8	0	0	0	6.5257	6.759	6.652	0	6.398	5.7225	5.8292
-144.7	0	0	0	6.5257	6.759	6.652	0	6.398	5.7225	5.8292
-144.6	0	0	0	6.5257	6.759	6.652	0	6.398	5.7225	5.8292
-144.5	0	0	0	6.5257	6.759	6.652	0	6.398	5.7225	5.8292
-144.4	0	0	0	6.5257	6.759	6.652	0	6.398	5.7225	5.8292
-144.3	0	0	0	6.5257	6.759	6.652	0	6.398	5.7225	5.8292
-144.2	0	0	0	6.5257	6.759	6.652	0	6.398	5.7225	5.8292
-144.1	0	0	0	6.5257	6.759	6.652	0	6.398	5.7225	5.8292
-144	0	0	0	6.5257	6.759	6.652	0	6.398	5.7225	5.8292
-143.9	0	0	0	6.5257	6.759	6.652	0	6.398	5.7225	5.8292
-143.8	0	0	0	6.5257	6.759	6.652	0	6.398	5.7225	5.8292
-143.7	0	0	0	6.5257	6.759	6.652	0	6.398	5.7225	5.8292
-143.6	0	0	0	6.5257	6.759	6.652	0	6.398	5.7225	5.8292
-143.5	0	0	0	6.5257	6.759	6.652	0	6.398	5.7225	5.8292
-143.4	0	0	0	6.5257	6.759	6.652	0	6.398	5.7225	5.8292
-143.3	0	0	0	6.5257	6.759	6.652	0	6.398	5.7225	5.8292
-143.2	0	0	0	6.5257	6.759	6.652	0	6.398	5.7225	5.8292
-143.1	0	0	0	6.5257	6.759	6.652	0	6.398	5.7225	5.8292
-143	0	0	0	6.5257	6.759	6.652	0	6.398	5.7225	5.8292
-142.9	0	0	0	6.5257	6.759	6.652	0	6.398	5.7225	5.8292
-142.8	0	0	0	6.5257	6.759	6.652	0	6.398	5.7225	5.8292
-142.7	0	0	0	6.5257	6.759	6.652	0	6.398	5.7225	5.8292
-142.6	0	0	0	6.5257	6.759	6.652	0	6.398	5.7225	5.8292
-142.5	0	0	0	6.5257	6.759	6.652	0	6.398	5.7225	5.8292
-142.4	0	0	0	6.5257	6.759	6.652	0	6.398	5.7225	5.8292
-142.3	0	0	0	6.5257	6.759	6.652	0	6.398	5.7225	5.8292
-142.2	0	0	0	6.5257	6.759	6.652	0	6.398	5.7225	5.8292
-142.1	0	0	0	6.5257	6.759	6.652	0	6.398	5.7225	5.8292
-142	0	0	0	6.5257	6.759	6.652	0	6.398	5.7225	5.8292
-141.9	0	0	0	6.5257	6.759	6.652	0	6.398	5.7225	5.8292
-141.8	0	0	0	6.5257	6.759	6.652	0	6.398	5.7225	5.8292
-141.7	0	0	0	6.5257	6.759	6.652	0	6.398	5.7225	5.8292
-141.6	0	0	0	6.5257	6.759	6.652	0	6.398	5.7225	5.8292
-141.5	0	0	0	6.5257	6.759	6.652	0	6.398	5.7225	5.8292
-141.4	0	0	0	6.5257	6.759	6.652	0	6.398	5.7225	5.8292
-141.3	0	0	0	6.5257	6.759	6.652	0	6.398	5.7225	5.8292
-141.2	0	0	0	6.5257	6.759	6.652	0	6.398	5.7225	5.8292
-141.1	0	0	0	6.5257	6.759	6.652	0	6.398	5.7225	5.8292
-141	0	0	0	6.5257	6.759	6.652	0	6.398	5.7225	5.8292
-140.9	0	0	0	6.5257	6.759	6.652	0	6.398	5.7225	5.8292
-140.8	0	0	0	6.5257	6.759	6.652	0	6.398	5.7225	5.8292
-140.7	0	0	0	6.5257	6.759	6.652	0	6.398	5.7225	5.8292
-140.6	0	0	0	6.5257	6.759	6.652	0	6.398	5.7225	5.8292
-140.5	0	0	0	6.5257	6.759	6.652	0	6.398	5.7225	5.8292
-140.4	0	0	0	6.5257	6.759	6.652	6.9964	6.398	5.7225	5.8292
-140.3	0	0	0	6.5257	6.759	6.652	6.9964	6.398	5.7225	5.8292
-140.2	0	0	0	6.5257	6.759	6.652	6.9964	6.398	5.7225	5.8292
-140.1	0	0	0	6.5257	6.759	6.652	6.9964	6.398	5.7225	5.8292
-140	0	0	0	6.5257	6.759	6.652	6.9964	6.398	5.7225	5.8292
-139.9	0	0	0	6.5257	6.759	6.652	6.9964	6.398	5.7225	5.8292
-139.8	0	0	0	6.5257	6.759	6.652	6.9964	6.398	5.7225	5.8292
-139.7	0	0	0	6.5257	6.759	6.652	6.9964	6.398	5.7225	5.8292
-139.6	0	0	0	6.5257	6.759	6.652	6.9964	6.398	5.7225	5.8292
-139.5	0	0	0	6.5257	6.759	6.652	6.9964	6.398	5.7225	5.8292
-139.4	0	0	0	6.5257	6.759	6.652	6.9964	6.398	5.7225	5.8292
-139.3	0	0	0	6.5257	6.759	6.652	6.9964	6.398	5.7225	5.8292
-139.2	0	0	0	6.5257	6.759	6.652	6.9964	6.398	5.7225	5.8292
-139.1	0	0	0	6.5257	6.759	6.652	6.9964	6.398	5.7225	5.8292
-139	0	0	0	6.5257	6.759	6.652	6.9964	6.398	5.7225	5.8292
-138.9	0	0	0	6.5257	6.759	6.652	6.9964	6.398	5.7225	5.8292
-138.8	0	0	0	6.5257	6.759	6.652	6.9964	6.398	5.7225	5.8292
-138.7	0	0	0	6.5257	6.759	6.652	6.9964	6.398	5.7225	5.8292
-138.6	0	0	0	6.5257	6.759	6.652	6.9964	6.398	5.7225	5.8292
-138.5	0	0	0	6.5257	6.759	6.652	6.9964	6.398	5.7225	5.8292
-138.4	0	0	0	6.5257	6.759	6.652	6.9964	6.398	5.7225	5.8292
-138.3	0	0	0	6.5257	6.759	6.652	6.9964	6.398	5.7225	5.8292
-138.2	0	0	0	6.5257	6.759	6.652	6.9964	6.398	5.7225	5.8292
-138.1	0	0	0	6.5257	6.759	6.652	6.9964	6.398	5.7225	5.8292
-138	0	0	0	6.5257	6.759	6.652	6.9964	6.398	5.7225	5.8292
-137.9	0	0	0	6.5257	6.759	6.652	6.9964	6.398	5.7225	5.8292
-137.8	0	0	0	6.5257	6.759	6.652	6.9964	6.398	5.7225	5.8292
-137.7	0	0	0	6.5257	6.759	6.652	6.9964	6.398	5.7225	5.8292
-137.6	0	0	0	6.5257	6.759	6.652	6.9964	6.398	5.7225	5.8292
-137.5	0	0	0	6.5257	6.759	6.652	6.9964	6.398	5.7225	5.8292
-137.4	0	0	0	6.5257	6.759	6.652	6.9964	6.398	5.7225	5.8292
-137.3	0	0	0	6.5257	6.759	6.652	6.9964	6.398	5.7225	5.8292
-137.2	0	0	0	6.5257	6.759	6.652	6.9964	6.398	5.7225	5.8292
-137.1	0	0	0	6.5257	6.759	6.652	6.9964	6.398	5.7225	5.8292
-137	0	0	0	6.5257	6.759	6.652	6.9964	6.398	5.7225	5.8292
-136.9	0	0	0	6.5257	6.759	6.652	6.9964	6.398	5.7225	5.8292
-136.8	0	0	0	6.5257	6.759	6.652	6.9964	6.398	5.7225	5.8292
-136.7	0	0	0	6.5257	6.759	6.652	6.9964	6.398	5.7225	5.8292
-136.6	0	0	0	6.5257	6.759	6.652	6.9964	6.398	5.7225	5.8292
-136.5	0	0	0	6.5257	6.759	6.652	6.9964	6.398	5.7225	5.8292
-136.4	0	0	0	6.5257	6.759	6.652	6.9964	6.398	5.7225	5.8292
-136.3	0	0	0	6.5257	6.759	6.652	6.9964	6.398	5.7225	5.8292
-136.2	0	0	0	6.5257	6.759	6.652	6.9964	6.398	5.7225	5.8292
-136.1	0	0	0	6.5257	6.759	6.652	6.9964	6.398	5.7225	5.8292
-136	0	0	0	6.5257	6.759	6.652	6.9964	6.398	5.7225	5.8292
-135.9	0	0	0	6.5257	6.759	6.652	6.9964	6.398	5.7225	5.8292
-135.8	0	0	0	6.5257	6.759	6.652	6.9964	6.398	5.7225	5.8292
-135.7	0	0	0	6.5257	6.759	6.652	6.9964	6.398	5.7225	5.8292
-135.6	0	0	0	6.5257	6.759	6.652	6.9964	6.398	5.7225	5.8292
-135.5	0	0	0	6.5257	6.759	6.652	6.9964	6.398	5.7225	5.8292
-135.4	0	0	0	6.5257	6.759	6.652	6.9964	6.398	5.7225	5.8292
-135.3	0	0	0	6.5257	6.759	6.652	6.9964	6.398	5.7225	5.8292
-135.2	0	0	0	6.5257	6.759	6.652	6.9964	6.398	5.7225	5.8292
-135.1	0	0	0	6.5257	6.759	6.652	6.9964	6.398	5.7225	5.8292
-135	0	0	0	6.5257	6.759	6.652	6.9964	6.398	5.7225	5.8292
-134.9	0	0	0	6.5257	6.759	6.652	6.9964	6.398	5.7225	5.8292
-134.8	0	0	0	6.5257	6.759	6.652	6.9964	6.398	5.7225	5.8292
-134.7	0	0	0	6.5257	6.759	6.652	6.9964	6.398	5.7225	5.8292
-134.6	0	0	0	6.5257	6.759	6.652	6.9964	6.398	5.7225	5.8292
-134.5	0	0	0	6.5257	6.759	6.652	6.9964	6.398	5.7225	5.8292
-134.4	0	0	0	6.5257	6.759	6.652	6.9964	6.398	5.7225	5.8292
-134.3	0	0	0	6.5257	6.759	6.652	6.9964	6.398	5.7225	5.8292
-134.2	0	0	0	6.5257	6.759	6.652	6.9964	6.398	5.7225	5.8292
-134.1	0	0	0	6.5257	6.759	6.652	6.9964	6.398	5.7225	5.8292
-134	0	0	0	6.5257	6.759	6.652	6.9964	6.398	5.7225	5.8292
-133.9	0	0	0	6.5257	6.759	6.652	6.9964	6.398	5.7225	5.8292
-133.8	0	0	0	6.5257	6.759	6.652	6.9964	6.398	5.7225	5.8292
-133.7	0	0	0	6.5257	6.759	6.652	6.9964	6.398	5.7225	5.8292
-133.6	0	0	0	6.5257	6.759	6.652	6.9964	6.398	5.7225	5.8292
-133.5	0	0	0	6.5257	6.759	6.652	6.9964	6.398	5.7225	5.8292
-133.4	0	0	0	6.5257	6.759	6.652	6.9964	6.398	5.7225	5.8292
-133.3	0	0	0	6.5257	6.759	6.652	6.9964	6.398	5.7225	5.8292
-133.2	0	0	0	6.5257	6.759	6.652	6.9964	6.398	5.7225	5.8292
-133.1	0	0	0	6.5257	6.759	6.652	6.9964	6.398	5.7225	5.8292
-133	0	0	0	6.5257	6.759	6.652	6.9964	6.398	5.7225	5.8292
-132.9	0	0	0	6.5257	6.759	6.652	6.9964	6.398	5.7225	5.8292
-132.8	0	0	0	6.5257	6.759	6.652	6.9964	6.398	5.7225	5.8292
-132.7	0	0	0	6.5257	6.759	6.652	6.9964	6.398	5.7225	5.8292
-132.6	0	0	0	6.5257	6.759	6.652	6.9964	6.398	5.7225	5.8292
-132.5	0	0	0	6.5257	6.759	6.652	6.9964	6.398	5.7225	5.8292
-132.4	0	0	0	6.5257	6.759	6.652	6.9964	6.398	5.7225	5.8292
-132.3	0	0	0	6.5257	6.759	6.652	6.9964	6.398	5.7225	5.8292
-132.2	0	0	0	6.5257	6.759	6.652	6.9964	6.398	5.7225	5.8292
-132.1	0	0	0	6.5257	6.759	6.652	6.9964	6.398	5.7225	5.8292
-132	0	0	0	6.5257	6.759	6.652	6.9964	6.398	5.7225	5.8292
-131.9	0	0	0	6.5257	6.759	6.652	6.9964	6.398	5.7225	5.8292
-131.8	0	0	0	6.5257	6.759	6.652	6.9964	6.398	5.7225	5.8292
-131.7	0	0	0	6.5257	6.759	6.652	6.9964	6.398	5.7225	5.8292
-131.6	0	0	0	6.5257	6.759	6.652	6.9964	6.398	5.7225	5.8292
-131.5	0	0	0	6.5257	6.759	6.652	6.9964	6.398	5.7225	5.8292
-131.4	0	0	0	6.5257	6.759	6.652	6.9964	6.398	5.7225	5.8292
-131.3	0	0	0	6.5257	6.759	6.652	6.9964	6.398	5.7225	5.8292
-131.2	0	0	0	6.5257	6.759	6.652	6.9964	6.398	5.7225	5.8292
-131.1	0	0	0	6.5257	6.759	6.652	6.9964	6.398	5.7225	5.8292
-131	0	0	0	6.5257	6.759	6.652	6.9964	6.398	5.7225	5.8292
-130.9	0	0	0	6.5257	6.759	6.652	6.9964	6.398	5.7225	5.8292
-130.8	0	0	0	6.5257	6.759	6.652	6.9964	6.398	5.7225	5.8292
-130.7	0	0	0	6.5257	6.759	6.652	6.9964	6.398	5.7225	5.8292
-130.6	0	0	0	6.5257	6.759	6.652	6.9964	6.398	5.7225	5.8292
-130.5	0	0	0	6.5257	6.759	6.652	6.9964	6.398	5.7225	5.8292
-130.4	0	0	0	6.5257	6.759	6.652	6.9964	6.398	5.7225	5.8292
-130.3	0	0	0	6.5257	6.759	6.652	6.9964	6.398	5.7225	5.8292
-130.2	0	0	0	6.5257	6.759	6.652	6.9964	6.398	5.7225	5.8292
-130.1	0	0	0	6.5257	6.759	6.652	6.9964	6.398	5.7225	5.8292
-130	0	0	0	6.5257	6.759	6.652	6.9964	6.398	5.7225	5.8292
-129.9	0	0	0	6.5257	6.759	6.652	6.9964	6.398	5.7225	5.8292
-129.8	0	0	0	6.5257	6.759	6.652	6.9964	6.398	5.7225	5.8292
-129.7	0	0	0	6.5257	6.759	6.652	6.9964	6.398	5.7225	5.8292
-129.6	0	0	0	6.5257	6.759	6.652	6.9964	6.398	5.7225	5.8292
-129.5	0	0	0	6.5257	6.759	6.652	6.9964	6.398	5.7225	5.8292
-129.4	0	0	0	6.5257	6.759	6.652	6.9964	6.398	5.7225	5.8292
-129.3	0	0	0	6.5257	6.759	6.652	6.9964	6.398	5.7225	5.8292
-129.2	0	0	0	6.5257	6.759	6.652	6.9964	6.398	5.7225	5.8292
-129.1	0	0	0	6.5257	6.759	6.652	6.9964	6.398	5.7225	5.8292
-129	0	0	0	6.5257	6.759	6.652	6.9964	6.398	5.7225	5.8292
-128.9	0	0	0	6.5257	6.759	6.652	6.9964	6.398	5.7225	5.8292
-128.8	0	0	0	6.5257	6.759	6.652	6.9964	6.398	5.7225	5.8292
-128.7	0	0	0	6.5257	6.759	6.652	6.9964	6.398	5.7225	5.8292
-128.6	0	0	0	6.5257	6.759	6.652	6.9964	6.398	5.7225	5.8292
-128.5	0	0	0	6.5257	6.759	6.652	6.9964	6.398	5.7225	5.8292
-128.4	0	0	0	6.5257	6.759	6.652	6.9964	6.398	5.7225	5.8292
-128.3	0	0	0	6.5257	6.759	6.652	6.9964	6.398	5.7225	5.8292
-128.2	0	0	0	6.5257	6.759	6.652	6.9964	6.398	5.7225	5.8292
-128.1	0	0	0	6.5257	6.759	6.652	6.9964	6.398	5.7225	5.8292
-128	0	0	0	6.5257	6.759	6.652	6.9964	6.398	5.7225	5.8292
-127.9	0	0	0	6.5257	6.759	6.652	6.9964	6.398	5.7225	5.8292
-127.8	0	0	0	6.5257	6.759	6.652	6.9964	6.398	5.7225	5.8292
-127.7	0	0	0	6.5257	6.759	6.652	6.9964	6.398	5.7225	5.8292
-127.6	0	0	0	6.5257	6.759	6.652	6.9964	6.398	5.7225	5.8292
-127.5	0	0	0	6.5257	6.759	6.652	6.9964	6.398	5.7225	5.8292
-127.4	0	0	0	6.5257	6.759	6.652	6.9964	6.398	5.7225	5.8292
-127.3	0	0	0	6.5257	6.759	6.652	6.9964	6.398	5.7225	5.8292
-127.2	0	0	0	6.5257	6.759	6.652	6.9964	6.398	5.7225	5.8292
-127.1	0	0	0	6.5257	6.759	6.652	6.9964	6.398	5.7225	5.8292
-127	0	0	0	6.5257	6.759	6.652	6.9964	6.398	5.7225	5.8292
-126.9	0	0	0	6.5257	6.759	6.652	6.9964	6.398	5.7225	5.8292
-126.8	0	0	0	6.5257	6.759	6.652	6.9964	6.398	5.7225	5.8292
-126.7	0	0	0	6.5257	6.759	6.652	6.9964	6.398	5.7225	5.8292
-126.6	0	0	0	6.5257	6.759	6.652	6.9964	6.398	5.7225	5.8292
-126.5	0	0	0	6.5257	6.759	6.652	6.9964	6.398	5.7225	5.8292
-126.4	0	0	0	6.5257	6.759	6.652	6.9964	6.398	5.7225	5.8292
-126.3	0	0	0	6.5257	6.759	6.652	6.9964	6.398	5.7225	5.8292
-126.2	0	0	0	6.5257	6.759	6.652	6.9964	6.398	5.7225	5.8292
-126.1	0	0	0	6.5257	6.759	6.652	6.9964	6.398	5.7225	5.8292
-126	0	0	0	6.5257	6.759	6.652	6.9964	6.398	5.7225	5.8292
-125.9	0	0	0	6.5257	6.759	6.652	6.9964	6.398	5.7225	5.8292
-125.8	0	0	0	6.5257	6.759	6.652	6.9964	6.398	5.7225	5.8292
-125.7	0	0	0	6.5257	6.759	6.652	6.9964	6.398	5.7225	5.8292
-125.6	0	0	0	6.5257	6.759	6.652	6.9964	6.398	5.7225	5.8292
-125.5	0	0	0	6.5257	6.759	6.652	6.9964	6.398	5.7225	5.8292
-125.4	0	0	0	6.5257	6.759	6.652	6.9964	6.398	5.7225	5.8292
-125.3	0	0	0	6.5257	6.759	6.652	6.9964	6.398	5.7225	5.8292
-125.2	0	0	0	6.5257	6.759	6.652	6.9964	6.398	5.7225	5.8292
-125.1	0	0	0	6.5257	6.759	6.652	6.9964	6.398	5.7225	5.8292
-125	0	0	0	6.5257	6.759	6.652	6.9964	6.398	5.7225	5.8292
-124.9	0	0	0	6.5257	6.759	6.652	6.9964	6.398	5.7225	5.8292
-124.8	0	0	0	6.5257	6.759	6.652	6.9964	6.398	5.7225	5.8292
-124.7	0	0	0	6.5257	6.759	6.652	6.9964	6.398	5.7225	5.8292
-124.6	0	0	0	6.5257	6.759	6.652	6.9964	6.398	5.7225	5.8292
-124.5	0	0	0	6.5257	6.759	6.652	6.9964	6.398	5.7225	5.8292
-124.4	0	0	0	6.5257	6.759	6.652	6.9964	6.398	5.7225	5.8292
-124.3	0	0	0	6.5257	6.759	6.652	6.9964	6.398	5.7225	5.8292
-124.2	0	0	0	6.5257	6.759	6.652	6.9964	6.398	5.7225	5.8292
-124.1	0	0	0	6.5257	6.759	6.652	6.9964	6.398	5.7225	5.8292
-124	0	0	0	6.5257	6.759	6.652	6.9964	6.398	5.7225	5.8292
-123.9	0	0	0	6.5257	6.759	6.652	6.9964	6.398	5.7225	5.8292
-123.8	0	0	0	6.5257	6.759	6.652	6.9964	6.398	5.7225	5.8292
-123.7	0	0	0	6.5257	6.759	6.652	6.9964	6.398	5.7225	5.8292
-123.6	0	0	0	6.5257	6.759	6.652	6.9964	6.398	5.7225	5.8292
-123.5	0	0	0	6.5257	6.759	6.652	6.9964	6.398	5.7225	5.8292
-123.4	0	0	0	6.5257	6.759	6.652	6.9964	6.398	5.7225	5.8292
-123.3	0	0	0	6.5257	6.759	6.652	6.9964	6.398	5.7225	5.8292
-123.2	0	0	0	6.5257	6.759	6.652	6.9964	6.398	5.7225	5.8292
-123.1	0	0	0	6.5257	6.759	6.652	6.9964	6.398	5.7225	5.8292
-123	0	0	0	6.5257	6.759	6.652	6.9964	6.398	5.7225	5.8292
-122.9	0	0	0	6.5257	6.759	6.652	6.9964	6.398	5.7225	5.8292
-122.8	0	0	0	6.5257	6.759	6.652	6.9964	6.398	5.7225	5.8292
-122.7	0	0	0	6.5257	6.759	6.652	6.9964	6.398	5.7225	5.8292
-122.6	0	0	0	6.5257	6.759	6.652	6.9964	6.398	5.7225	5.8292
-122.5	0	0	0	6.5257	6.759	6.652	6.9964	6.398	5.7225	5.8292
-122.4	0	0	0	6.5257	6.759	6.652	6.9964	6.398	5.7225	5.8292
-122.3	0	0	0	6.5257	6.759	6.652	6.9964	6.398	5.7225	5.8292
-122.2	0	0	0	6.5257	6.759	6.652	6.9964	6.398	5.7225	5.8292
-122.1	0	0	0	6.5257	6.759	6.652	6.9964	6.398	5.7225	5.8292
-122	0	0	0	6.5257	6.759	6.652	6.9964	6.398	5.7225	5.8292
-121.9	0	0	0	6.5257	6.759	6.652	6.9964	6.398	5.7225	5.8292
-121.8	0	0	0	6.5257	6.759	6.652	6.9964	6.398	5.7225	5.8292
-121.7	0	0	0	6.5257	6.759	6.652	6.9964	6.398	5.7225	5.8292
-121.6	0	0	0	6.5257	6.759	6.652	6.9964	6.398	5.7225	5.8292
-121.5	0	0	0	6.5257	6.759	6.652	6.9964	6.398	5.7225	5.8292
-121.4	0	0	0	6.5257	6.759	6.652	6.9964	6.398	5.7225	5.8292
-121.3	0	0	0	6.5257	6.759	6.652	6.9964	6.398	5.7225	5.8292
-121.2	0	0	0	6.5257	6.759	6.652	6.9964	6.398	5.7225	5.8292
-121.1	0	0	0	6.5257	6.759	6.652	6.9964	6.398	5.7225	5.8292
-121	0	0	0	6.5257	6.759	6.652	6.9964	6.398	5.7225	5.8292
-120.9	0	0	0	6.5257	6.759	6.652	6.9964	6.398	5.7225	5.8292
-120.8	8.1212	0	0	6.5257	6.759	6.652	6.9964	6.398	5.7225	5.8292
-120.7	8.1212	0	0	6.5257	6.759	6.652	6.9964	6.398	5.7225	5.8292
-120.6	8.1212	0	0	6.5257	6.759	6.652	6.9964	6.398	5.7225	5.8292
-120.5	8.1212	0	0	6.5257	6.759	6.652	6.9964	6.398	5.7225	5.8292
-120.4	8.1212	0	0	6.5257	6.759	6.652	6.9964	6.398	5.7225	5.8292
-120.3	8.1212	0	0	6.5257	6.759	6.652	6.9964	6.398	5.7225	5.8292
-120.2	8.1212	0	0	6.5257	6.759	6.652	6.9964	6.398	5.7225	5.8292
-120.1	8.1212	0	0	6.5257	6.759	6.652	6.9964	6.398	5.7225	5.8292
-120	8.1212	8.1599	0	6.5257	6.759	6.652	6.9964	6.398	5.7225	5.8292
-119.9	8.1212	8.1599	0	6.5257	6.759	6.652	6.9964	6.398	5.7225	5.8292
-119.8	8.1212	8.1599	0	6.5257	6.759	6.652	6.9964	6.398	5.7225	5.8292
-119.7	8.1212	8.1599	0	6.5257	6.759	6.652	6.9964	6.398	5.7225	5.8292
-119.6	8.1212	8.1599	0	6.5257	6.759	6.652	6.9964	6.398	5.7225	5.8292
-119.5	8.1212	8.1599	0	6.5257	6.759	6.652	6.9964	6.398	5.7225	5.8292
-119.4	8.1212	8.1599	0	6.5257	6.759	6.652	6.9964	6.398	5.7225	5.8292
-119.3	8.1212	8.1599	0	6.5257	6.759	6.652	6.9964	6.398	5.7225	5.8292
-119.2	8.1212	8.1599	0	6.5257	6.759	6.652	6.9964	6.398	5.7225	5.8292
-119.1	8.1212	8.1599	0	6.5257	6.759	6.652	6.9964	6.398	5.7225	5.8292
-119	8.1212	8.1599	0	6.5257	6.759	6.652	6.9964	6.398	5.7225	5.8292
-118.9	8.1212	8.1599	0	6.5257	6.759	6.652	6.9964	6.398	5.7225	5.8292
-118.8	8.1212	8.1599	0	6.5257	6.759	6.652	6.9964	6.398	5.7225	5.8292
-118.7	8.1212	8.1599	0	6.5257	6.759	6.652	6.9964	6.398	5.7225	5.8292
-118.6	8.1212	8.1599	0	6.5257	6.759	6.652	6.9964	6.398	5.7225	5.8292
-118.5	8.1212	8.1599	0	6.5257	6.759	6.652	6.9964	6.398	5.7225	5.8292
-118.4	8.1212	8.1599	0	6.5257	6.759	6.652	6.9964	6.398	5.7225	5.8292
-118.3	8.1212	8.1599	0	6.5257	6.759	6.652	6.9964	6.398	5.7225	5.8292
-118.2	8.1212	8.1599	0	6.5257	6.759	6.652	6.9964	6.398	5.7225	5.8292
-118.1	8.1212	8.1599	0	6.5257	6.759	6.652	6.9964	6.398	5.7225	5.8292
-118	8.1212	8.1599	0	6.5257	6.759	6.652	6.9964	6.398	5.7225	5.8292
-117.9	8.1212	8.1599	0	6.5257	6.759	6.652	6.9964	6.398	5.7225	5.8292
-117.8	8.1212	8.1599	0	6.5257	6.759	6.652	6.9964	6.398	5.7225	5.8292
-117.7	8.1212	8.1599	0	6.5257	6.759	6.652	6.9964	6.398	5.7225	5.8292
-117.6	8.1212	8.1599	0	6.5257	6.759	6.652	6.9964	6.398	5.7225	5.8292
-117.5	8.1212	8.1599	0	6.5257	6.759	6.652	6.9964	6.398	5.7225	5.8292
-117.4	8.1212	8.1599	0	6.5257	6.759	6.652	6.9964	6.398	5.7225	5.8292
-117.3	8.1212	8.1599	0	6.5257	6.759	6.652	6.9964	6.398	5.7225	5.8292
-117.2	8.1212	8.1599	0	6.5257	6.759	6.652	6.9964	6.398	5.7225	5.8292
-117.1	8.1212	8.1599	0	6.5257	6.759	6.652	6.9964	6.398	5.7225	5.8292
-117	8.1212	8.1599	0	6.5257	6.759	6.652	6.9964	6.398	5.7225	5.8292
-116.9	8.1212	8.1599	0	6.5257	6.759	6.652	6.9964	6.398	5.7225	5.8292
-116.8	8.1212	8.1599	0	6.5257	6.759	6.652	6.9964	6.398	5.7225	5.8292
-116.7	8.1212	8.1599	0	6.5257	6.759	6.652	6.9964	6.398	5.7225	5.8292
-116.6	8.1212	8.1599	0	6.5257	6.759	6.652	6.9964	6.398	5.7225	5.8292
-116.5	8.1212	8.1599	0	6.5257	6.759	6.652	6.9964	6.398	5.7225	5.8292
-116.4	8.1212	8.1599	0	6.5257	6.759	6.652	6.9964	6.398	5.7225	5.8292
-116.3	8.1212	8.1599	0	6.5257	6.759	6.652	6.9964	6.398	5.7225	5.8292
-116.2	8.1212	8.1599	0	6.5257	6.759	6.652	6.9964	6.398	5.7225	5.8292
-116.1	8.1212	8.1599	0	6.5257	6.759	6.652	6.9964	6.398	5.7225	5.8292
-116	8.1212	8.1599	0	6.5257	6.759	6.652	6.9964	6.398	5.7225	5.8292
-115.9	8.1212	8.1599	0	6.5257	6.759	6.652	6.9964	6.398	5.7225	5.8292
-115.8	8.1212	8.1599	0	6.5257	6.759	6.652	6.9964	6.398	5.7225	5.8292
-115.7	8.1212	8.1599	0	6.5257	6.759	6.652	6.9964	6.398	5.7225	5.8292
-115.6	8.1212	8.1599	0	6.5257	6.759	6.652	6.9964	6.398	5.7225	5.8292
-115.5	8.1212	8.1599	0	6.5257	6.759	6.652	6.9964	6.398	5.7225	5.8292
-115.4	8.1212	8.1599	0	6.5257	6.759	6.652	6.9964	6.398	5.7225	5.8292
-115.3	8.1212	8.1599	0	6.5257	6.759	6.652	6.9964	6.398	5.7225	5.8292
-115.2	8.1212	8.1599	0	6.5257	6.759	6.652	6.9964	6.398	5.7225	5.8292
-115.1	8.1212	8.1599	0	6.5257	6.759	6.652	6.9964	6.398	5.7225	5.8292
-115	8.1212	8.1599	0	6.5257	6.759	6.652	6.9964	6.398	5.7225	5.8292
-114.9	8.1212	8.1599	0	6.5257	6.759	6.652	6.9964	6.398	5.7225	5.8292
-114.8	8.1212	8.1599	0	6.5257	6.759	6.652	6.9964	6.398	5.7225	5.8292
-114.7	8.1212	8.1599	0	6.5257	6.759	6.652	6.9964	6.398	5.7225	5.8292
-114.6	8.1212	8.1599	0	6.5257	6.759	6.652	6.9964	6.398	5.7225	5.8292
-114.5	8.1212	8.1599	0	6.5257	6.759	6.652	6.9964	6.398	5.7225	5.8292
-114.4	8.1212	8.1599	0	6.5257	6.759	6.652	6.9964	6.398	5.7225	5.8292
-114.3	8.1212	8.1599	0	6.5257	6.759	6.652	6.9964	6.398	5.7225	5.8292
-114.2	8.1212	8.1599	0	6.5257	6.759	6.652	6.9964	6.398	5.7225	5.8292
-114.1	8.1212	8.1599	0	6.5257	6.759	6.652	6.9964	6.398	5.7225	5.8292
-114	8.1212	8.1599	0	6.5257	6.759	6.652	6.9964	6.398	5.7225	5.8292
-113.9	8.1212	8.1599	0	6.5257	6.759	6.652	6.9964	6.398	5.7225	5.8292
-113.8	8.1212	8.1599	0	6.5257	6.759	6.652	6.9964	6.398	5.7225	5.8292
-113.7	8.1212	8.1599	0	6.5257	6.759	6.652	6.9964	6.398	5.7225	5.8292
-113.6	8.1212	8.1599	0	6.5257	6.759	6.652	6.9964	6.398	5.7225	5.8292
-113.5	8.1212	8.1599	0	6.5257	6.759	6.652	6.9964	6.398	5.7225	5.8292
-113.4	8.1212	8.1599	0	6.5257	6.759	6.652	6.9964	6.398	5.7225	5.8292
-113.3	8.1212	8.1599	0	6.5257	6.759	6.652	6.9964	6.398	5.7225	5.8292
-113.2	8.1212	8.1599	0	6.5257	6.759	6.652	6.9964	6.398	5.7225	5.8292
-113.1	8.1212	8.1599	0	6.5257	6.759	6.652	6.9964	6.398	5.7225	5.8292
-113	8.1212	8.1599	0	6.5257	6.759	6.652	6.9964	6.398	5.7225	5.8292
-112.9	8.1212	8.1599	0	6.5257	6.759	6.652	6.9964	6.398	5.7225	5.8292
-112.8	8.1212	8.1599	0	6.5257	6.759	6.652	6.9964	6.398	5.7225	5.8292
-112.7	8.1212	8.1599	0	6.5257	6.759	6.652	6.9964	6.398	5.7225	5.8292
-112.6	8.1212	8.1599	0	6.5257	6.759	6.652	6.9964	6.398	5.7225	5.8292
-112.5	8.1212	8.1599	0	6.5257	6.759	6.652	6.9964	6.398	5.7225	5.8292
-112.4	8.1212	8.1599	0	6.5257	6.759	6.652	6.9964	6.398	5.7225	5.8292
-112.3	8.1212	8.1599	0	6.5257	6.759	6.652	6.9964	6.398	5.7225	5.8292
-112.2	8.1212	8.1599	0	6.5257	6.759	6.652	6.9964	6.398	5.7225	5.8292
-112.1	8.1212	8.1599	0	6.5257	6.759	6.652	6.9964	6.398	5.7225	5.8292
-112	8.1212	8.1599	0	6.5257	6.759	6.652	6.9964	6.398	5.7225	5.8292
-111.9	8.1212	8.1599	0	6.5257	6.759	6.652	6.9964	6.398	5.7225	5.8292
-111.8	8.1212	8.1599	0	6.5257	6.759	6.652	6.9964	6.398	5.7225	5.8292
-111.7	8.1212	8.1599	0	6.5257	6.759	6.652	6.9964	6.398	5.7225	5.8292
-111.6	8.1212	8.1599	0	6.5257	6.759	6.652	6.9964	6.398	5.7225	5.8292
-111.5	8.1212	8.1599	0	6.5257	6.759	6.652	6.9964	6.398	5.7225	5.8292
-111.4	8.1212	8.1599	0	6.5257	6.759	6.652	6.9964	6.398	5.7225	5.8292
-111.3	8.1212	8.1599	0	6.5257	6.759	6.652	6.9964	6.398	5.7225	5.8292
-111.2	8.1212	8.1599	0	6.5257	6.759	6.652	6.9964	6.398	5.7225	5.8292
-111.1	8.1212	8.1599	0	6.5257	6.759	6.652	6.9964	6.398	5.7225	5.8292
-111	8.1212	8.1599	0	6.5257	6.759	6.652	6.9964	6.398	5.7225	5.8292
-110.9	8.1212	8.1599	0	6.5257	6.759	6.652	6.9964	6.398	5.7225	5.8292
-110.8	8.1212	8.1599	0	6.5257	6.759	6.652	6.9964	6.398	5.7225	5.8292
-110.7	8.1212	8.1599	0	6.5257	6.759	6.652	6.9964	6.398	5.7225	5.8292
-110.6	8.1212	8.1599	0	6.5257	6.759	6.652	6.9964	6.398	5.7225	5.8292
-110.5	8.1212	8.1599	0	6.5257	6.759	6.652	6.9964	6.398	5.7225	5.8292
-110.4	8.1212	8.1599	0	6.5257	6.759	6.652	6.9964	6.398	5.7225	5.8292
-110.3	8.1212	8.1599	0	6.5257	6.759	6.652	6.9964	6.398	5.7225	5.8292
-110.2	8.1212	8.1599	0	6.5257	6.759	6.652	6.9964	6.398	5.7225	5.8292
-110.1	8.1212	8.1599	0	6.5257	6.759	6.652	6.9964	6.398	5.7225	5.8292
-110	8.1212	8.1599	0	6.5257	6.759	6.652	6.9964	6.398	5.7225	5.8292
-109.9	8.1212	8.1599	0	6.5257	6.759	6.652	6.9964	6.398	5.7225	5.8292
-109.8	8.1212	8.1599	0	6.5257	6.759	6.652	6.9964	6.398	5.7225	5.8292
-109.7	8.1212	8.1599	0	6.5257	6.759	6.652	6.9964	6.398	5.7225	5.8292
-109.6	8.1212	8.1599	0	6.5257	6.759	6.652	6.9964	6.398	5.7225	5.8292
-109.5	8.1212	8.1599	0	6.5257	6.759	6.652	6.9964	6.398	5.7225	5.8292
-109.4	8.1212	8.1599	0	6.5257	6.759	6.652	6.9964	6.398	5.7225	5.8292
-109.3	8.1212	8.1599	0	6.5257	6.759	6.652	6.9964	6.398	5.7225	5.8292
-109.2	8.1212	8.1599	0	6.5257	6.759	6.652	6.9964	6.398	5.7225	5.8292
-109.1	8.1212	8.1599	0	6.5257	6.759	6.652	6.9964	6.398	5.7225	5.8292
-109	8.1212	8.1599	0	6.5257	6.759	6.652	6.9964	6.398	5.7225	5.8292
-108.9	8.1212	8.1599	0	6.5257	6.759	6.652	6.9964	6.398	5.7225	5.8292
-108.8	8.1212	8.1599	0	6.5257	6.759	6.652	6.9964	6.398	5.7225	5.8292
-108.7	8.1212	8.1599	0	6.5257	6.759	6.652	6.9964	6.398	5.7225	5.8292
-108.6	8.1212	8.1599	0	6.5257	6.759	6.652	6.9964	6.398	5.7225	5.8292
-108.5	8.1212	8.1599	0	6.5257	6.759	6.652	6.9964	6.398	5.7225	5.8292
-108.4	8.1212	8.1599	0	6.5257	6.759	6.652	6.9964	6.398	5.7225	5.8292
-108.3	8.1212	8.1599	0	6.5257	6.759	6.652	6.9964	6.398	5.7225	5.8292
-108.2	8.1212	8.1599	0	6.5257	6.759	6.652	6.9964	6.398	5.7225	5.8292
-108.1	8.1212	8.1599	0	6.5257	6.759	6.652	6.9964	6.398	5.7225	5.8292
-108	8.1212	8.1599	0	6.5257	6.759	6.652	6.9964	6.398	5.7225	5.8292
-107.9	8.1212	8.1599	0	6.5257	6.759	6.652	6.9964	6.398	5.7225	5.8292
-107.8	8.1212	8.1599	0	6.5257	6.759	6.652	6.9964	6.398	5.7225	5.8292
-107.7	8.1212	8.1599	0	6.5257	6.759	6.652	6.9964	6.398	5.7225	5.8292
-107.6	8.1212	8.1599	0	6.5257	6.759	6.652	6.9964	6.398	5.7225	5.8292
-107.5	8.1212	8.1599	0	6.5257	6.759	6.652	6.9964	6.398	5.7225	5.8292
-107.4	8.1212	8.1599	0	6.5257	6.759	6.652	6.9964	6.398	5.7225	5.8292
-107.3	8.1212	8.1599	0	6.5257	6.759	6.652	6.9964	6.398	5.7225	5.8292
-107.2	8.1212	8.1599	0	6.5257	6.759	6.652	6.9964	6.398	5.7225	5.8292
-107.1	8.1212	8.1599	0	6.5257	6.759	6.652	6.9964	6.398	5.7225	5.8292
-107	8.1212	8.1599	0	6.5257	6.759	6.652	6.9964	6.398	5.7225	5.8292
-106.9	8.1212	8.1599	0	6.5257	6.759	6.652	6.9964	6.398	5.7225	5.8292
-106.8	8.1212	8.1599	0	6.5257	6.759	6.652	6.9964	6.398	5.7225	5.8292
-106.7	8.1212	8.1599	0	6.5257	6.759	6.652	6.9964	6.398	5.7225	5.8292
-106.6	8.1212	8.1599	0	6.5257	6.759	6.652	6.9964	6.398	5.7225	5.8292
-106.5	8.1212	8.1599	0	6.5257	6.759	6.652	6.9964	6.398	5.7225	5.8292
-106.4	8.1212	8.1599	0	6.5257	6.759	6.652	6.9964	6.398	5.7225	5.8292
-106.3	8.1212	8.1599	0	6.5257	6.759	6.652	6.9964	6.398	5.7225	5.8292
-106.2	8.1212	8.1599	0	6.5257	6.759	6.652	6.9964	6.398	5.7225	5.8292
-106.1	8.1212	8.1599	0	6.5257	6.759	6.652	6.9964	6.398	5.7225	5.8292
-106	8.1212	8.1599	0	6.5257	6.759	6.652	6.9964	6.398	5.7225	5.8292
-105.9	8.1212	8.1599	0	6.5257	6.759	6.652	6.9964	6.398	5.7225	5.8292
-105.8	8.1212	8.1599	0	6.5257	6.759	6.652	6.9964	6.398	5.7225	5.8292
-105.7	8.1212	8.1599	0	6.5257	6.759	6.652	6.9964	6.398	5.7225	5.8292
-105.6	8.1212	8.1599	0	6.5257	6.759	6.652	6.9964	6.398	5.7225	5.8292
-105.5	8.1212	8.1599	0	6.5257	6.759	6.652	6.9964	6.398	5.7225	5.8292
-105.4	8.1212	8.1599	0	6.5257	6.759	6.652	6.9964	6.398	5.7225	5.8292
-105.3	8.1212	8.1599	0	6.5257	6.759	6.652	6.9964	6.398	5.7225	5.8292
-105.2	8.1212	8.1599	0	6.5257	6.759	6.652	6.9964	6.398	5.7225	5.8292
-105.1	8.1212	8.1599	0	6.5257	6.759	6.652	6.9964	6.398	5.7225	5.8292
-105	8.1212	8.1599	0	6.5257	6.759	6.652	6.9964	6.398	5.7225	5.8292
-104.9	8.1212	8.1599	0	6.5257	6.759	6.652	6.9964	6.398	5.7225	5.8292
-104.8	8.1212	8.1599	0	6.5257	6.759	6.652	6.9964	6.398	5.7225	5.8292
-104.7	8.1212	8.1599	0	6.5257	6.759	6.652	6.9964	6.398	5.7225	5.8292
-104.6	8.1212	8.1599	0	6.5257	6.759	6.652	6.9964	6.398	5.7225	5.8292
-104.5	8.1212	8.1599	0	6.5257	6.759	6.652	6.9964	6.398	5.7225	5.8292
-104.4	8.1212	8.1599	0	6.5257	6.759	6.652	6.9964	6.398	5.7225	5.8292
-104.3	8.1212	8.1599	0	6.5257	6.759	6.652	6.9964	6.398	5.7225	5.8292
-104.2	8.1212	8.1599	0	6.5257	6.759	6.652	6.9964	6.398	5.7225	5.8292
-104.1	8.1212	8.1599	0	6.5257	6.759	6.652	6.9964	6.398	5.7225	5.8292
-104	8.1212	8.1599	0	6.5257	6.759	6.652	6.9964	6.398	5.7225	5.8292
-103.9	8.1212	8.1599	0	6.5257	6.759	6.652	6.9964	6.398	5.7225	5.8292
-103.8	8.1212	8.1599	0	6.5257	6.759	6.652	6.9964	6.398	5.7225	5.8292
-103.7	8.1212	8.1599	0	6.5257	6.759	6.652	6.9964	6.398	5.7225	5.8292
-103.6	8.1212	8.1599	0	6.5257	6.759	6.652	6.9964	6.398	5.7225	5.8292
-103.5	8.1212	8.1599	0	6.5257	6.759	6.652	6.9964	6.398	5.7225	5.8292
-103.4	8.1212	8.1599	0	6.5257	6.759	6.652	6.9964	6.398	5.7225	5.8292
-103.3	8.1212	8.1599	0	6.5257	6.759	6.652	6.9964	6.398	5.7225	5.8292
-103.2	8.1212	8.1599	0	6.5257	6.759	6.652	6.9964	6.398	5.7225	5.8292
-103.1	8.1212	8.1599	0	6.5257	6.759	6.652	6.9964	6.398	5.7225	5.8292
-103	8.1212	8.1599	0	6.5257	6.759	6.652	6.9964	6.398	5.7225	5.8292
-102.9	8.1212	8.1599	0	6.5257	6.759	6.652	6.9964	6.398	5.7225	5.8292
-102.8	8.1212	8.1599	0	6.5257	6.759	6.652	6.9964	6.398	5.7225	5.8292
-102.7	8.1212	8.1599	0	6.5257	6.759	6.652	6.9964	6.398	5.7225	5.8292
-102.6	8.1212	8.1599	0	6.5257	6.759	6.652	6.9964	6.398	5.7225	5.8292
-102.5	8.1212	8.1599	0	6.5257	6.759	6.652	6.9964	6.398	5.7225	5.8292
-102.4	8.1212	8.1599	0	6.5257	6.759	6.652	6.9964	6.398	5.7225	5.8292
-102.3	8.1212	8.1599	0	6.5257	6.759	6.652	6.9964	6.398	5.7225	5.8292
-102.2	8.1212	8.1599	0	6.5257	6.759	6.652	6.9964	6.398	5.7225	5.8292
-102.1	8.1212	8.1599	0	6.5257	6.759	6.652	6.9964	6.398	5.7225	5.8292
-102	8.1212	8.1599	0	6.5257	6.759	6.652	6.9964	6.398	5.7225	5.8292
-101.9	8.1212	8.1599	0	6.5257	6.759	6.652	6.9964	6.398	5.7225	5.8292
-101.8	8.1212	8.1599	0	6.5257	6.759	6.652	6.9964	6.398	5.7225	5.8292
-101.7	8.1212	8.1599	0	6.5257	6.759	6.652	6.9964	6.398	5.7225	5.8292
-101.6	8.1212	8.1599	0	6.5257	6.759	6.652	6.9964	6.398	5.7225	5.8292
-101.5	8.1212	8.1599	0	6.5257	6.759	6.652	6.9964	6.398	5.7225	5.8292
-101.4	8.1212	8.1599	0	6.5257	6.759	6.652	6.9964	6.398	5.7225	5.8292
-101.3	8.1212	8.1599	0	6.5257	6.759	6.652	6.9964	6.398	5.7225	5.8292
-101.2	8.1212	8.1599	0	6.5257	6.759	6.652	6.9964	6.398	5.7225	5.8292
-101.1	8.1212	8.1599	0	6.5257	6.759	6.652	6.9964	6.398	5.7225	5.8292
-101	8.1212	8.1599	0	6.5257	6.759	6.652	6.9964	6.398	5.7225	5.8292
-100.9	8.1212	8.1599	0	6.5257	6.759	6.652	6.9964	6.398	5.7225	5.8292
-100.8	8.1212	8.1599	0	6.5257	6.759	6.652	6.9964	6.398	5.7225	5.8292
-100.7	8.1212	8.1599	0	6.5257	6.759	6.652	6.9964	6.398	5.7225	5.8292
-100.6	8.1212	8.1599	0	6.5257	6.759	6.652	6.9964	6.398	5.7225	5.8292
-100.5	8.1212	8.1599	0	6.5257	6.759	6.652	6.9964	6.398	5.7225	5.8292
-100.4	8.1212	8.1599	0	6.5257	6.759	6.652	6.9964	6.398	5.7225	5.8292
-100.3	8.1212	8.1599	0	6.5257	6.759	6.652	6.9964	6.398	5.7225	5.8292
-100.2	8.1212	8.1599	0	6.5257	6.759	6.652	6.9964	6.398	5.7225	5.8292
-100.1	8.1212	8.1599	0	6.5257	6.759	6.652	6.9964	6.398	5.7225	5.8292
-100	8.1212	8.1599	0	6.5257	6.759	6.652	6.9964	6.398	5.7225	5.8292
-99.9	8.1212	8.1599	0	6.5257	6.759	6.652	6.9964	6.398	5.7225	5.8292
-99.8	8.1212	8.1599	0	6.5257	6.759	6.652	6.9964	6.398	5.7225	5.8292
-99.7	8.1212	8.1599	0	6.5257	6.759	6.652	6.9964	6.398	5.7225	5.8292
-99.6	8.1212	8.1599	0	6.5257	6.759	6.652	6.9964	6.398	5.7225	5.8292
-99.5	8.1212	8.1599	0	6.5257	6.759	6.652	6.9964	6.398	5.7225	5.8292
-99.4	8.1212	8.1599	0	6.5257	6.759	6.652	6.9964	6.398	5.7225	5.8292
-99.3	8.1212	8.1599	0	6.5257	6.759	6.652	6.9964	6.398	5.7225	5.8292
-99.2	8.1212	8.1599	0	6.5257	6.759	6.652	6.9964	6.398	5.7225	5.8292
-99.1	8.1212	8.1599	0	6.5257	6.759	6.652	6.9964	6.398	5.7225	5.8292
-99	8.1212	8.1599	0	6.5257	6.759	6.652	6.9964	6.398	5.7225	5.8292
-98.9	8.1212	8.1599	0	6.5257	6.759	6.652	6.9964	6.398	5.7225	5.8292
-98.8	8.1212	8.1599	0	6.5257	6.759	6.652	6.9964	6.398	5.7225	5.8292
-98.7	8.1212	8.1599	0	6.5257	6.759	6.652	6.9964	6.398	5.7225	5.8292
-98.6	8.1212	8.1599	0	6.5257	6.759	6.652	6.9964	6.398	5.7225	5.8292
-98.5	8.1212	8.1599	0	6.5257	6.759	6.652	6.9964	6.398	5.7225	5.8292
-98.4	8.1212	8.1599	0	6.5257	6.759	6.652	6.9964	6.398	5.7225	5.8292
-98.3	8.1212	8.1599	0	6.5257	6.759	6.652	6.9964	6.398	5.7225	5.8292
-98.2	8.1212	8.1599	0	6.5257	6.759	6.652	6.9964	6.398	5.7225	5.8292
-98.1	8.1212	8.1599	0	6.5257	6.759	6.652	6.9964	6.398	5.7225	5.8292
-98	8.1212	8.1599	0	6.5257	6.759	6.652	6.9964	6.398	5.7225	5.8292
-97.9	8.1212	8.1599	0	6.5257	6.759	6.652	6.9964	6.398	5.7225	5.8292
-97.8	8.1212	8.1599	0	6.5257	6.759	6.652	6.9964	6.398	5.7225	5.8292
-97.7	8.1212	8.1599	0	6.5257	6.759	6.652	6.9964	6.398	5.7225	5.8292
-97.6	8.1212	8.1599	0	6.5257	6.759	6.652	6.9964	6.398	5.7225	5.8292
-97.5	8.1212	8.1599	0	6.5257	6.759	6.652	6.9964	6.398	5.7225	5.8292
-97.4	8.1212	8.1599	0	6.5257	6.759	6.652	6.9964	6.398	5.7225	5.8292
-97.3	8.1212	8.1599	0	6.5257	6.759	6.652	6.9964	6.398	5.7225	5.8292
-97.2	8.1212	8.1599	0	6.5257	6.759	6.652	6.9964	6.398	5.7225	5.8292
-97.1	8.1212	8.1599	0	6.5257	6.759	6.652	6.9964	6.398	5.7225	5.8292
-97	8.1212	8.1599	0	6.5257	6.759	6.652	6.9964	6.398	5.7225	5.8292
-96.9	8.1212	8.1599	0	6.5257	6.759	6.652	6.9964	6.398	5.7225	5.8292
-96.8	8.1212	8.1599	0	6.5257	6.759	6.652	6.9964	6.398	5.7225	5.8292
-96.7	8.1212	8.1599	0	6.5257	6.759	6.652	6.9964	6.398	5.7225	5.8292
-96.6	8.1212	8.1599	0	6.5257	6.759	6.652	6.9964	6.398	5.7225	5.8292
-96.5	8.1212	8.1599	0	6.5257	6.759	6.652	6.9964	6.398	5.7225	5.8292
-96.4	8.1212	8.1599	0	6.5257	6.759	6.652	6.9964	6.398	5.7225	5.8292
-96.3	8.1212	8.1599	0	6.5257	6.759	6.652	6.9964	6.398	5.7225	5.8292
-96.2	8.1212	8.1599	0	6.5257	6.759	6.652	6.9964	6.398	5.7225	5.8292
-96.1	8.1212	8.1599	0	6.5257	6.759	6.652	6.9964	6.398	5.7225	5.8292
-96	8.1212	8.1599	0	6.5257	6.759	6.652	6.9964	6.398	5.7225	5.8292
-95.9	8.1212	8.1599	0	6.5257	6.759	6.652	6.9964	6.398	5.7225	5.8292
-95.8	8.1212	8.1599	0	6.5257	6.759	6.652	6.9964	6.398	5.7225	5.8292
-95.7	8.1212	8.1599	0	6.5257	6.759	6.652	6.9964	6.398	5.7225	5.8292
-95.6	8.1212	8.1599	0	6.5257	6.759	6.652	6.9964	6.398	5.7225	5.8292
-95.5	8.1212	8.1599	0	6.5257	6.759	6.652	6.9964	6.398	5.7225	5.8292
-95.4	8.1212	8.1599	0	6.5257	6.759	6.652	6.9964	6.398	5.7225	5.8292
-95.3	8.1212	8.1599	0	6.5257	6.759	6.652	6.9964	6.398	5.7225	5.8292
-95.2	8.1212	8.1599	0	6.5257	6.759	6.652	6.9964	6.398	5.7225	5.8292
-95.1	8.1212	8.1599	0	6.5257	6.759	6.652	6.9964	6.398	5.7225	5.8292
-95	8.1212	8.1599	0	6.5257	6.759	6.652	6.9964	6.398	5.7225	5.8292
-94.9	8.1212	8.1599	0	6.5257	6.759	6.652	6.9964	6.398	5.7225	5.8292
-94.8	8.1212	8.1599	0	6.5257	6.759	6.652	6.9964	6.398	5.7225	5.8292
-94.7	8.1212	8.1599	0	6.5257	6.759	6.652	6.9964	6.398	5.7225	5.8292
-94.6	8.1212	8.1599	0	6.5257	6.759	6.652	6.9964	6.398	5.7225	5.8292
-94.5	8.1212	8.1599	0	6.5257	6.759	6.652	6.9964	6.398	5.7225	5.8292
-94.4	8.1212	8.1599	0	6.5257	6.759	6.652	6.9964	6.398	5.7225	5.8292
-94.3	8.1212	8.1599	0	6.5257	6.759	6.652	6.9964	6.398	5.7225	5.8292
-94.2	8.1212	8.1599	0	6.5257	6.759	6.652	6.9964	6.398	5.7225	5.8292
-94.1	8.1212	8.1599	0	6.5257	6.759	6.652	6.9964	6.398	5.7225	5.8292
-94	8.1212	8.1599	0	6.5257	6.759	6.652	6.9964	6.398	5.7225	5.8292
-93.9	8.1212	8.1599	0	6.5257	6.759	6.652	6.9964	6.398	5.7225	5.8292
-93.8	8.1212	8.1599	0	6.5257	6.759	6.652	6.9964	6.398	5.7225	5.8292
-93.7	8.1212	8.1599	0	6.5257	6.759	6.652	6.9964	6.398	5.7225	5.8292
-93.6	8.1212	8.1599	0	6.5257	6.759	6.652	6.9964	6.398	5.7225	5.8292
-93.5	8.1212	8.1599	0	6.5257	6.759	6.652	6.9964	6.398	5.7225	5.8292
-93.4	8.1212	8.1599	0	6.5257	6.759	6.652	6.9964	6.398	5.7225	5.8292
-93.3	8.1212	8.1599	0	6.5257	6.759	6.652	6.9964	6.398	5.7225	5.8292
-93.2	8.1212	8.1599	0	6.5257	6.759	6.652	6.9964	6.398	5.7225	5.8292
-93.1	8.1212	8.1599	0	6.5257	6.759	6.652	6.9964	6.398	5.7225	5.8292
-93	8.1212	8.1599	0	6.5257	6.759	6.652	6.9964	6.398	5.7225	5.8292
-92.9	8.1212	8.1599	0	6.5257	6.759	6.652	6.9964	6.398	5.7225	5.8292
-92.8	8.1212	8.1599	0	6.5257	6.759	6.652	6.9964	6.398	5.7225	5.8292
-92.7	8.1212	8.1599	0	6.5257	6.759	6.652	6.9964	6.398	5.7225	5.8292
-92.6	8.1212	8.1599	0	6.5257	6.759	6.652	6.9964	6.398	5.7225	5.8292
-92.5	8.1212	8.1599	0	6.5257	6.759	6.652	6.9964	6.398	5.7225	5.8292
-92.4	8.1212	8.1599	0	6.5257	6.759	6.652	6.9964	6.398	5.7225	5.8292
-92.3	8.1212	8.1599	0	6.5257	6.759	6.652	6.9964	6.398	5.7225	5.8292
-92.2	8.1212	8.1599	0	6.5257	6.759	6.652	6.9964	6.398	5.7225	5.8292
-92.1	8.1212	8.1599	0	6.5257	6.759	6.652	6.9964	6.398	5.7225	5.8292
-92	8.1212	8.1599	0	6.5257	6.759	6.652	6.9964	6.398	5.7225	5.8292
-91.9	8.1212	8.1599	0	6.5257	6.759	6.652	6.9964	6.398	5.7225	5.8292
-91.8	8.1212	8.1599	0	6.5257	6.759	6.652	6.9964	6.398	5.7225	5.8292
-91.7	8.1212	8.1599	0	6.5257	6.759	6.652	6.9964	6.398	5.7225	5.8292
-91.6	8.1212	8.1599	0	6.5257	6.759	6.652	6.9964	6.398	5.7225	5.8292
-91.5	8.1212	8.1599	0	6.5257	6.759	6.652	6.9964	6.398	5.7225	5.8292
-91.4	8.1212	8.1599	0	6.5257	6.759	6.652	6.9964	6.398	5.7225	5.8292
-91.3	8.1212	8.1599	0	6.5257	6.759	6.652	6.9964	6.398	5.7225	5.8292
-91.2	8.1212	8.1599	0	6.5257	6.759	6.652	6.9964	6.398	5.7225	5.8292
-91.1	8.1212	8.1599	0	6.5257	6.759	6.652	6.9964	6.398	5.7225	5.8292
-91	8.1212	8.1599	0	6.5257	6.759	6.652	6.9964	6.398	5.7225	5.8292
-90.9	8.1212	8.1599	0	6.5257	6.759	6.652	6.9964	6.398	5.7225	5.8292
-90.8	8.1212	8.1599	0	6.5257	6.759	6.652	6.9964	6.398	5.7225	5.8292
-90.7	8.1212	8.1599	0	6.5257	6.759	6.652	6.9964	6.398	5.7225	5.8292
-90.6	8.1212	8.1599	0	6.5257	6.759	6.652	6.9964	6.398	5.7225	5.8292
-90.5	8.1212	8.1599	0	6.5257	6.759	6.652	6.9964	6.398	5.7225	5.8292
-90.4	8.1212	8.1599	0	6.5257	6.759	6.652	6.9964	6.398	5.7225	5.8292
-90.3	8.1212	8.1599	0	6.5257	6.759	6.652	6.9964	6.398	5.7225	5.8292
-90.2	8.1212	8.1599	0	6.5257	6.759	6.652	6.9964	6.398	5.7225	5.8292
-90.1	8.1212	8.1599	0	6.5257	6.759	6.652	6.9964	6.398	5.7225	5.8292
-90	8.1212	8.1599	0	6.5257	6.759	6.652	6.9964	6.398	5.7225	5.8292
-89.9	8.1212	8.1599	0	6.5257	6.759	6.652	6.9964	6.398	5.7225	5.8292
-89.8	8.1212	8.1599	0	6.5257	6.759	6.652	6.9964	6.398	5.7225	5.8292
-89.7	8.1212	8.1599	0	6.5257	6.759	6.652	6.9964	6.398	5.7225	5.8292
-89.6	8.1212	8.1599	0	6.5257	6.759	6.652	6.9964	6.398	5.7225	5.8292
-89.5	8.1212	8.1599	0	6.5257	6.759	6.652	6.9964	6.398	5.7225	5.8292
-89.4	8.1212	8.1599	0	6.5257	6.759	6.652	6.9964	6.398	5.7225	5.8292
-89.3	8.1212	8.1599	0	6.5257	6.759	6.652	6.9964	6.398	5.7225	5.8292
-89.2	8.1212	8.1599	0	6.5257	6.759	6.652	6.9964	6.398	5.7225	5.8292
-89.1	8.1212	8.1599	0	6.5257	6.759	6.652	6.9964	6.398	5.7225	5.8292
-89	8.1212	8.1599	0	6.5257	6.759	6.652	6.9964	6.398	5.7225	5.8292
-88.9	8.1212	8.1599	0	6.5257	6.759	6.652	6.9964	6.398	5.7225	5.8292
-88.8	8.1212	8.1599	0	6.5257	6.759	6.652	6.9964	6.398	5.7225	5.8292
-88.7	8.1212	8.1599	0	6.5257	6.759	6.652	6.9964	6.398	5.7225	5.8292
-88.6	8.1212	8.1599	0	6.5257	6.759	6.652	6.9964	6.398	5.7225	5.8292
-88.5	8.1212	8.1599	0	6.5257	6.759	6.652	6.9964	6.398	5.7225	5.8292
-88.4	8.1212	8.1599	0	6.5257	6.759	6.652	6.9964	6.398	5.7225	5.8292
-88.3	8.1212	8.1599	0	6.5257	6.759	6.652	6.9964	6.398	5.7225	5.8292
-88.2	8.1212	8.1599	0	6.5257	6.759	6.652	6.9964	6.398	5.7225	5.8292
-88.1	8.1212	8.1599	0	6.5257	6.759	6.652	6.9964	6.398	5.7225	5.8292
-88	8.1212	8.1599	0	6.5257	6.759	6.652	6.9964	6.398	5.7225	5.8292
-87.9	8.1212	8.1599	0	6.5257	6.759	6.652	6.9964	6.398	5.7225	5.8292
-87.8	8.1212	8.1599	0	6.5257	6.759	6.652	6.9964	6.398	5.7225	5.8292
-87.7	8.1212	8.1599	0	6.5257	6.759	6.652	6.9964	6.398	5.7225	5.8292
-87.6	8.1212	8.1599	0	6.5257	6.759	6.652	6.9964	6.398	5.7225	5.8292
-87.5	8.1212	8.1599	0	6.5257	6.759	6.652	6.9964	6.398	5.7225	5.8292
-87.4	8.1212	8.1599	0	6.5257	6.759	6.652	6.9964	6.398	5.7225	5.8292
-87.3	8.1212	8.1599	0	6.5257	6.759	6.652	6.9964	6.398	5.7225	5.8292
-87.2	8.1212	8.1599	0	6.5257	6.759	6.652	6.9964	6.398	5.7225	5.8292
-87.1	8.1212	8.1599	0	6.5257	6.759	6.652	6.9964	6.398	5.7225	5.8292
-87	8.1212	8.1599	0	6.5257	6.759	6.652	6.9964	6.398	5.7225	5.8292
-86.9	8.1212	8.1599	0	6.5257	6.759	6.652	6.9964	6.398	5.7225	5.8292
-86.8	8.1212	8.1599	0	6.5257	6.759	6.652	6.9964	6.398	5.7225	5.8292
-86.7	8.1212	8.1599	0	6.5257	6.759	6.652	6.9964	6.398	5.7225	5.8292
-86.6	8.1212	8.1599	0	6.5257	6.759	6.652	6.9964	6.398	5.7225	5.8292
-86.5	8.1212	8.1599	0	6.5257	6.759	6.652	6.9964	6.398	5.7225	5.8292
-86.4	8.1212	8.1599	0	6.5257	6.759	6.652	6.9964	6.398	5.7225	5.8292
-86.3	8.1212	8.1599	0	6.5257	6.759	6.652	6.9964	6.398	5.7225	5.8292
-86.2	8.1212	8.1599	0	6.5257	6.759	6.652	6.9964	6.398	5.7225	5.8292
-86.1	8.1212	8.1599	0	6.5257	6.759	6.652	6.9964	6.398	5.7225	5.8292
-86	8.1212	8.1599	0	6.5257	6.759	6.652	6.9964	6.398	5.7225	5.8292
-85.9	8.1212	8.1599	0	6.5257	6.759	6.652	6.9964	6.398	5.7225	5.8292
-85.8	8.1212	8.1599	0	6.5257	6.759	6.652	6.9964	6.398	5.7225	5.8292
-85.7	8.1212	8.1599	0	6.5257	6.759	6.652	6.9964	6.398	5.7225	5.8292
-85.6	8.1212	8.1599	0	6.5257	6.759	6.652	6.9964	6.398	5.7225	5.8292
-85.5	8.1212	8.1599	0	6.5257	6.759	6.652	6.9964	6.398	5.7225	5.8292
-85.4	8.1212	8.1599	0	6.5257	6.759	6.652	6.9964	6.398	5.7225	5.8292
-85.3	8.1212	8.1599	0	6.5257	6.759	6.652	6.9964	6.398	5.7225	5.8292
-85.2	8.1212	8.1599	0	6.5257	6.759	6.652	6.9964	6.398	5.7225	5.8292
-85.1	8.1212	8.1599	0	6.5257	6.759	6.652	6.9964	6.398	5.7225	5.8292
-85	8.1212	8.1599	0	6.5257	6.759	6.652	6.9964	6.398	5.7225	5.8292
-84.9	8.1212	8.1599	0	6.5257	6.759	6.652	6.9964	6.398	5.7225	5.8292
-84.8	8.1212	8.1599	0	6.5257	6.759	6.652	6.9964	6.398	5.7225	5.8292
-84.7	8.1212	8.1599	0	6.5257	6.759	6.652	6.9964	6.398	5.7225	5.8292
-84.6	8.1212	8.1599	0	6.5257	6.759	6.652	6.9964	6.398	5.7225	5.8292
-84.5	8.1212	8.1599	0	6.5257	6.759	6.652	6.9964	6.398	5.7225	5.8292
-84.4	8.1212	8.1599	0	6.5257	6.759	6.652	6.9964	6.398	5.7225	5.8292
-84.3	8.1212	8.1599	0	6.5257	6.759	6.652	6.9964	6.398	5.7225	5.8292
-84.2	8.1212	8.1599	0	6.5257	6.759	6.652	6.9964	6.398	5.7225	5.8292
-84.1	8.1212	8.1599	0	6.5257	6.759	6.652	6.9964	6.398	5.7225	5.8292
-84	8.1212	8.1599	0	6.5257	6.759	6.652	6.9964	6.398	5.7225	5.8292
-83.9	8.1212	8.1599	0	6.5257	6.759	6.652	6.9964	6.398	5.7225	5.8292
-83.8	8.1212	8.1599	0	6.5257	6.759	6.652	6.9964	6.398	5.7225	5.8292
-83.7	8.1212	8.1599	0	6.5257	6.759	6.652	6.9964	6.398	5.7225	5.8292
-83.6	8.1212	8.1599	0	6.5257	6.759	6.652	6.9964	6.398	5.7225	5.8292
-83.5	8.1212	8.1599	0	6.5257	6.759	6.652	6.9964	6.398	5.7225	5.8292
-83.4	8.1212	8.1599	0	6.5257	6.759	6.652	6.9964	6.398	5.7225	5.8292
-83.3	8.1212	8.1599	0	6.5257	6.759	6.652	6.9964	6.398	5.7225	5.8292
-83.2	8.1212	8.1599	0	6.5257	6.759	6.652	6.9964	6.398	5.7225	5.8292
-83.1	8.1212	8.1599	0	6.5257	6.759	6.652	6.9964	6.398	5.7225	5.8292
-83	8.1212	8.1599	0	6.5257	6.759	6.652	6.9964	6.398	5.7225	5.8292
-82.9	8.1212	8.1599	0	6.5257	6.759	6.652	6.9964	6.398	5.7225	5.8292
-82.8	8.1212	8.1599	0	6.5257	6.759	6.652	6.9964	6.398	5.7225	5.8292
-82.7	8.1212	8.1599	0	6.5257	6.759	6.652	6.9964	6.398	5.7225	5.8292
-82.6	8.1212	8.1599	0	6.5257	6.759	6.652	6.9964	6.398	5.7225	5.8292
-82.5	8.1212	8.1599	0	6.5257	6.759	6.652	6.9964	6.398	5.7225	5.8292
-82.4	8.1212	8.1599	0	6.5257	6.759	6.652	6.9964	6.398	5.7225	5.8292
-82.3	8.1212	8.1599	0	6.5257	6.759	6.652	6.9964	6.398	5.7225	5.8292
-82.2	8.1212	8.1599	0	6.5257	6.759	6.652	6.9964	6.398	5.7225	5.8292
-82.1	8.1212	8.1599	0	6.5257	6.759	6.652	6.9964	6.398	5.7225	5.8292
-82	8.1212	8.1599	0	6.5257	6.759	6.652	6.9964	6.398	5.7225	5.8292
-81.9	8.1212	8.1599	0	6.5257	6.759	6.652	6.9964	6.398	5.7225	5.8292
-81.8	8.1212	8.1599	0	6.5257	6.759	6.652	6.9964	6.398	5.7225	5.8292
-81.7	8.1212	8.1599	0	6.5257	6.759	6.652	6.9964	6.398	5.7225	5.8292
-81.6	8.1212	8.1599	0	6.5257	6.759	6.652	6.9964	6.398	5.7225	5.8292
-81.5	8.1212	8.1599	0	6.5257	6.759	6.652	6.9964	6.398	5.7225	5.8292
-81.4	8.1212	8.1599	0	6.5257	6.759	6.652	6.9964	6.398	5.7225	5.8292
-81.3	8.1212	8.1599	0	6.5257	6.759	6.652	6.9964	6.398	5.7225	5.8292
-81.2	8.1212	8.1599	0	6.5257	6.759	6.652	6.9964	6.398	5.7225	5.8292
-81.1	8.1212	8.1599	0	6.5257	6.759	6.652	6.9964	6.398	5.7225	5.8292
-81	8.1212	8.1599	0	6.5257	6.759	6.652	6.9964	6.398	5.7225	5.8292
-80.9	8.1212	8.1599	0	6.5257	6.759	6.652	6.9964	6.398	5.7225	5.8292
-80.8	8.1212	8.1599	0	6.5257	6.759	6.652	6.9964	6.398	5.7225	5.8292
-80.7	8.1212	8.1599	0	6.5257	6.759	6.652	6.9964	6.398	5.7225	5.8292
-80.6	8.1212	8.1599	0	6.5257	6.759	6.652	6.9964	6.398	5.7225	5.8292
-80.5	8.1212	8.1599	0	6.5257	6.759	6.652	6.9964	6.398	5.7225	5.8292
-80.4	8.1212	8.1599	0	6.5257	6.759	6.652	6.9964	6.398	5.7225	5.8292
-80.3	8.1212	8.1599	0	6.5257	6.759	6.652	6.9964	6.398	5.7225	5.8292
-80.2	8.1212	8.1599	0	6.5257	6.759	6.652	6.9964	6.398	5.7225	5.8292
-80.1	8.1212	8.1599	0	6.5257	6.759	6.652	6.9964	6.398	5.7225	5.8292
-80	8.1212	8.1599	0	6.5257	6.759	6.652	6.9964	6.398	5.7225	5.8292
-79.9	8.1212	8.1599	0	6.5257	6.759	6.652	6.9964	6.398	5.7225	5.8292
-79.8	8.1212	8.1599	0	6.5257	6.759	6.652	6.9964	6.398	5.7225	5.8292
-79.7	8.1212	8.1599	0	6.5257	6.759	6.652	6.9964	6.398	5.7225	5.8292
-79.6	8.1212	8.1599	0	6.5257	6.759	6.652	6.9964	6.398	5.7225	5.8292
-79.5	8.1212	8.1599	0	6.5257	6.759	6.652	6.9964	6.398	5.7225	5.8292
-79.4	8.1212	8.1599	0	6.5257	6.759	6.652	6.9964	6.398	5.7225	5.8292
-79.3	8.1212	8.1599	0	6.5257	6.759	6.652	6.9964	6.398	5.7225	5.8292
-79.2	8.1212	8.1599	0	6.5257	6.759	6.652	6.9964	6.398	5.7225	5.8292
-79.1	8.1212	8.1599	0	6.5257	6.759	6.652	6.9964	6.398	5.7225	5.8292
-79	8.1212	8.1599	0	6.5257	6.759	6.652	6.9964	6.398	5.7225	5.8292
-78.9	8.1212	8.1599	0	6.5257	6.759	6.652	6.9964	6.398	5.7225	5.8292
-78.8	8.1212	8.1599	0	6.5257	6.759	6.652	6.9964	6.398	5.7225	5.8292
-78.7	8.1212	8.1599	0	6.5257	6.759	6.652	6.9964	6.398	5.7225	5.8292
-78.6	8.1212	8.1599	0	6.5257	6.759	6.652	6.9964	6.398	5.7225	5.8292
-78.5	8.1212	8.1599	0	6.5257	6.759	6.652	6.9964	6.398	5.7225	5.8292
-78.4	8.1212	8.1599	0	6.5257	6.759	6.652	6.9964	6.398	5.7225	5.8292
-78.3	8.1212	8.1599	0	6.5257	6.759	6.652	6.9964	6.398	5.7225	5.8292
-78.2	8.1212	8.1599	0	6.5257	6.759	6.652	6.9964	6.398	5.7225	5.8292
-78.1	8.1212	8.1599	0	6.5257	6.759	6.652	6.9964	6.398	5.7225	5.8292
-78	8.1212	8.1599	0	6.5257	6.759	6.652	6.9964	6.398	5.7225	5.8292
-77.9	8.1212	8.1599	0	6.5257	6.759	6.652	6.9964	6.398	5.7225	5.8292
-77.8	8.1212	8.1599	0	6.5257	6.759	6.652	6.9964	6.398	5.7225	5.8292
-77.7	8.1212	8.1599	0	6.5257	6.759	6.652	6.9964	6.398	5.7225	5.8292
-77.6	8.1212	8.1599	0	6.5257	6.759	6.652	6.9964	6.398	5.7225	5.8292
-77.5	8.1212	8.1599	0	6.5257	6.759	6.652	6.9964	6.398	5.7225	5.8292
-77.4	8.1212	8.1599	0	6.5257	6.759	6.652	6.9964	6.398	5.7225	5.8292
-77.3	8.1212	8.1599	0	6.5257	6.759	6.652	6.9964	6.398	5.7225	5.8292
-77.2	8.1212	8.1599	0	6.5257	6.759	6.652	6.9964	6.398	5.7225	5.8292
-77.1	8.1212	8.1599	0	6.5257	6.759	6.652	6.9964	6.398	5.7225	5.8292
-77	8.1212	8.1599	0	6.5257	6.759	6.652	6.9964	6.398	5.7225	5.8292
-76.9	8.1212	8.1599	0	6.5257	6.759	6.652	6.9964	6.398	5.7225	5.8292
-76.8	8.1212	8.1599	0	6.5257	6.759	6.652	6.9964	6.398	5.7225	5.8292
-76.7	8.1212	8.1599	0	6.5257	6.759	6.652	6.9964	6.398	5.7225	5.8292
-76.6	8.1212	8.1599	0	6.5257	6.759	6.652	6.9964	6.398	5.7225	5.8292
-76.5	8.1212	8.1599	0	6.5257	6.759	6.652	6.9964	6.398	5.7225	5.8292
-76.4	8.1212	8.1599	0	6.5257	6.759	6.652	6.9964	6.398	5.7225	5.8292
-76.3	8.1212	8.1599	0	6.5257	6.759	6.652	6.9964	6.398	5.7225	5.8292
-76.2	8.1212	8.1599	0	6.5257	6.759	6.652	6.9964	6.398	5.7225	5.8292
-76.1	8.1212	8.1599	0	6.5257	6.759	6.652	6.9964	6.398	5.7225	5.8292
-76	8.1212	8.1599	0	6.5257	6.759	6.652	6.9964	6.398	5.7225	5.8292
-75.9	8.1212	8.1599	0	6.5257	6.759	6.652	6.9964	6.398	5.7225	5.8292
-75.8	8.1212	8.1599	0	6.5257	6.759	6.652	6.9964	6.398	5.7225	5.8292
-75.7	8.1212	8.1599	0	6.5257	6.759	6.652	6.9964	6.398	5.7225	5.8292
-75.6	8.1212	8.1599	0	6.5257	6.759	6.652	6.9964	6.398	5.7225	5.8292
-75.5	8.1212	8.1599	0	6.5257	6.759	6.652	6.9964	6.398	5.7225	5.8292
-75.4	8.1212	8.1599	0	6.5257	6.759	6.652	6.9964	6.398	5.7225	5.8292
-75.3	8.1212	8.1599	0	6.5257	6.759	6.652	6.9964	6.398	5.7225	5.8292
-75.2	8.1212	8.1599	0	6.5257	6.759	6.652	6.9964	6.398	5.7225	5.8292
-75.1	8.1212	8.1599	0	6.5257	6.759	6.652	6.9964	6.398	5.7225	5.8292
-75	8.1212	8.1599	0	6.5257	6.759	6.652	6.9964	6.398	5.7225	5.8292
-74.9	8.1212	8.1599	0	6.5257	6.759	6.652	6.9964	6.398	5.7225	5.8292
-74.8	8.1212	8.1599	0	6.5257	6.759	6.652	6.9964	6.398	5.7225	5.8292
-74.7	8.1212	8.1599	0	6.5257	6.759	6.652	6.9964	6.398	5.7225	5.8292
-74.6	8.1212	8.1599	0	6.5257	6.759	6.652	6.9964	6.398	5.7225	5.8292
-74.5	8.1212	8.1599	0	6.5257	6.759	6.652	6.9964	6.398	5.7225	5.8292
-74.4	8.1212	8.1599	0	6.5257	6.759	6.652	6.9964	6.398	5.7225	5.8292
-74.3	8.1212	8.1599	0	6.5257	6.759	6.652	6.9964	6.398	5.7225	5.8292
-74.2	8.1212	8.1599	0	6.5257	6.759	6.652	6.9964	6.398	5.7225	5.8292
-74.1	8.1212	8.1599	0	6.5257	6.759	6.652	6.9964	6.398	5.7225	5.8292
-74	8.1212	8.1599	0	6.5257	6.759	6.652	6.9964	6.398	5.7225	5.8292
-73.9	8.1212	8.1599	0	6.5257	6.759	6.652	6.9964	6.398	5.7225	5.8292
-73.8	8.1212	8.1599	0	6.5257	6.759	6.652	6.9964	6.398	5.7225	5.8292
-73.7	8.1212	8.1599	0	6.5257	6.759	6.652	6.9964	6.398	5.7225	5.8292
-73.6	8.1212	8.1599	0	6.5257	6.759	6.652	6.9964	6.398	5.7225	5.8292
-73.5	8.1212	8.1599	0	6.5257	6.759	6.652	6.9964	6.398	5.7225	5.8292
-73.4	8.1212	8.1599	0	6.5257	6.759	6.652	6.9964	6.398	5.7225	5.8292
-73.3	8.1212	8.1599	0	6.5257	6.759	6.652	6.9964	6.398	5.7225	5.8292
-73.2	8.1212	8.1599	0	6.5257	6.759	6.652	6.9964	6.398	5.7225	5.8292
-73.1	8.1212	8.1599	0	6.5257	6.759	6.652	6.9964	6.398	5.7225	5.8292
-73	8.1212	8.1599	0	6.5257	6.759	6.652	6.9964	6.398	5.7225	5.8292
-72.9	8.1212	8.1599	0	6.5257	6.759	6.652	6.9964	6.398	5.7225	5.8292
-72.8	8.1212	8.1599	0	6.5257	6.759	6.652	6.9964	6.398	5.7225	5.8292
-72.7	8.1212	8.1599	0	6.5257	6.759	6.652	6.9964	6.398	5.7225	5.8292
-72.6	8.1212	8.1599	0	6.5257	6.759	6.652	6.9964	6.398	5.7225	5.8292
-72.5	8.1212	8.1599	0	6.5257	6.759	6.652	6.9964	6.398	5.7225	5.8292
-72.4	8.1212	8.1599	0	6.5257	6.759	6.652	6.9964	6.398	5.7225	5.8292
-72.3	8.1212	8.1599	0	6.5257	6.759	6.652	6.9964	6.398	5.7225	5.8292
-72.2	8.1212	8.1599	0	6.5257	6.759	6.652	6.9964	6.398	5.7225	5.8292
-72.1	8.1212	8.1599	0	6.5257	6.759	6.652	6.9964	6.398	5.7225	5.8292
-72	8.1212	8.1599	0	6.5257	6.759	6.652	6.9964	6.398	5.7225	5.8292
-71.9	8.1212	8.1599	0	6.5257	6.759	6.652	6.9964	6.398	5.7225	5.8292
-71.8	8.1212	8.1599	0	6.5257	6.759	6.652	6.9964	6.398	5.7225	5.8292
-71.7	8.1212	8.1599	0	6.5257	6.759	6.652	6.9964	6.398	5.7225	5.8292
-71.6	8.1212	8.1599	0	6.5257	6.759	6.652	6.9964	6.398	5.7225	5.8292
-71.5	8.1212	8.1599	0	6.5257	6.759	6.652	6.9964	6.398	5.7225	5.8292
-71.4	8.1212	8.1599	0	6.5257	6.759	6.652	6.9964	6.398	5.7225	5.8292
-71.3	8.1212	8.1599	0	6.5257	6.759	6.652	6.9964	6.398	5.7225	5.8292
-71.2	8.1212	8.1599	0	6.5257	6.759	6.652	6.9964	6.398	5.7225	5.8292
-71.1	8.1212	8.1599	0	6.5257	6.759	6.652	6.9964	6.398	5.7225	5.8292
-71	8.1212	8.1599	0	6.5257	6.759	6.652	6.9964	6.398	5.7225	5.8292
-70.9	8.1212	8.1599	0	6.5257	6.759	6.652	6.9964	6.398	5.7225	5.8292
-70.8	8.1212	8.1599	0	6.5257	6.759	6.652	6.9964	6.398	5.7225	5.8292
-70.7	8.1212	8.1599	0	6.5257	6.759	6.652	6.9964	6.398	5.7225	5.8292
-70.6	8.1212	8.1599	0	6.5257	6.759	6.652	6.9964	6.398	5.7225	5.8292
-70.5	8.1212	8.1599	0	6.5257	6.759	6.652	6.9964	6.398	5.7225	5.8292
-70.4	8.1212	8.1599	0	6.5257	6.759	6.652	6.9964	6.398	5.7225	5.8292
-70.3	8.1212	8.1599	0	6.5257	6.759	6.652	6.9964	6.398	5.7225	5.8292
-70.2	8.1212	8.1599	0	6.5257	6.759	6.652	6.9964	6.398	5.7225	5.8292
-70.1	8.1212	8.1599	0	6.5257	6.759	6.652	6.9964	6.398	5.7225	5.8292
-70	8.1212	8.1599	0	6.5257	6.759	6.652	6.9964	6.398	5.7225	5.8292
-69.9	8.1212	8.1599	0	6.5257	6.759	6.652	6.9964	6.398	5.7225	5.8292
-69.8	8.1212	8.1599	0	6.5257	6.759	6.652	6.9964	6.398	5.7225	5.8292
-69.7	8.1212	8.1599	0	6.5257	6.759	6.652	6.9964	6.398	5.7225	5.8292
-69.6	8.1212	8.1599	0	6.5257	6.759	6.652	6.9964	6.398	5.7225	5.8292
-69.5	8.1212	8.1599	0	6.5257	6.759	6.652	6.9964	6.398	5.7225	5.8292
-69.4	8.1212	8.1599	0	6.5257	6.759	6.652	6.9964	6.398	5.7225	5.8292
-69.3	8.1212	8.1599	0	6.5257	6.759	6.652	6.9964	6.398	5.7225	5.8292
-69.2	8.1212	8.1599	0	6.5257	6.759	6.652	6.9964	6.398	5.7225	5.8292
-69.1	8.1212	8.1599	0	6.5257	6.759	6.652	6.9964	6.398	5.7225	5.8292
-69	8.1212	8.1599	0	6.5257	6.759	6.652	6.9964	6.398	5.7225	5.8292
-68.9	8.1212	8.1599	0	6.5257	6.759	6.652	6.9964	6.398	5.7225	5.8292
-68.8	8.1212	8.1599	0	6.5257	6.759	6.652	6.9964	6.398	5.7225	5.8292
-68.7	8.1212	8.1599	0	6.5257	6.759	6.652	6.9964	6.398	5.7225	5.8292
-68.6	8.1212	8.1599	0	6.5257	6.759	6.652	6.9964	6.398	5.7225	5.8292
-68.5	8.1212	8.1599	0	6.5257	6.759	6.652	6.9964	6.398	5.7225	5.8292
-68.4	8.1212	8.1599	0	6.5257	6.759	6.652	6.9964	6.398	5.7225	5.8292
-68.3	8.1212	8.1599	0	6.5257	6.759	6.652	6.9964	6.398	5.7225	5.8292
-68.2	8.1212	8.1599	0	6.5257	6.759	6.652	6.9964	6.398	5.7225	5.8292
-68.1	8.1212	8.1599	0	6.5257	6.759	6.652	6.9964	6.398	5.7225	5.8292
-68	8.1212	8.1599	0	6.5257	6.759	6.652	6.9964	6.398	5.7225	5.8292
-67.9	8.1212	8.1599	0	6.5257	6.759	6.652	6.9964	6.398	5.7225	5.8292
-67.8	8.1212	8.1599	0	6.5257	6.759	6.652	6.9964	6.398	5.7225	5.8292
-67.7	8.1212	8.1599	0	6.5257	6.759	6.652	6.9964	6.398	5.7225	5.8292
-67.6	8.1212	8.1599	0	6.5257	6.759	6.652	6.9964	6.398	5.7225	5.8292
-67.5	8.1212	8.1599	0	6.5257	6.759	6.652	6.9964	6.398	5.7225	5.8292
-67.4	8.1212	8.1599	0	6.5257	6.759	6.652	6.9964	6.398	5.7225	5.8292
-67.3	8.1212	8.1599	0	6.5257	6.759	6.652	6.9964	6.398	5.7225	5.8292
-67.2	8.1212	8.1599	0	6.5257	6.759	6.652	6.9964	6.398	5.7225	5.8292
-67.1	8.1212	8.1599	0	6.5257	6.759	6.652	6.9964	6.398	5.7225	5.8292
-67	8.1212	8.1599	0	6.5257	6.759	6.652	6.9964	6.398	5.7225	5.8292
-66.9	8.1212	8.1599	0	6.5257	6.759	6.652	6.9964	6.398	5.7225	5.8292
-66.8	8.1212	8.1599	0	6.5257	6.759	6.652	6.9964	6.398	5.7225	5.8292
-66.7	8.1212	8.1599	0	6.5257	6.759	6.652	6.9964	6.398	5.7225	5.8292
-66.6	8.1212	8.1599	0	6.5257	6.759	6.652	6.9964	6.398	5.7225	5.8292
-66.5	8.1212	8.1599	0	6.5257	6.759	6.652	6.9964	6.398	5.7225	5.8292
-66.4	8.1212	8.1599	0	6.5257	6.759	6.652	6.9964	6.398	5.7225	5.8292
-66.3	8.1212	8.1599	0	6.5257	6.759	6.652	6.9964	6.398	5.7225	5.8292
-66.2	8.1212	8.1599	0	6.5257	6.759	6.652	6.9964	6.398	5.7225	5.8292
-66.1	8.1212	8.1599	0	6.5257	6.759	6.652	6.9964	6.398	5.7225	5.8292
-66	8.1212	8.1599	0	6.5257	6.759	6.652	6.9964	6.398	5.7225	5.8292
-65.9	8.1212	8.1599	0	6.5257	6.759	6.652	6.9964	6.398	5.7225	5.8292
-65.8	8.1212	8.1599	0	6.5257	6.759	6.652	6.9964	6.398	5.7225	5.8292
-65.7	8.1212	8.1599	0	6.5257	6.759	6.652	6.9964	6.398	5.7225	5.8292
-65.6	8.1212	8.1599	0	6.5257	6.759	6.652	6.9964	6.398	5.7225	5.8292
-65.5	8.1212	8.1599	0	6.5257	6.759	6.652	6.9964	6.398	5.7225	5.8292
-65.4	8.1212	8.1599	0	6.5257	6.759	6.652	6.9964	6.398	5.7225	5.8292
-65.3	8.1212	8.1599	0	6.5257	6.759	6.652	6.9964	6.398	5.7225	5.8292
-65.2	8.1212	8.1599	0	6.5257	6.759	6.652	6.9964	6.398	5.7225	5.8292
-65.1	8.1212	8.1599	14.734	6.5257	6.759	6.652	6.9964	6.398	5.7225	5.8292
-65	8.1212	8.1599	14.734	6.5257	6.759	6.652	6.9964	6.398	5.7225	5.8292
-64.9	8.1212	8.1599	14.734	6.5257	6.759	6.652	6.9964	6.398	5.7225	5.8292
-64.8	8.1212	8.1599	14.734	6.5257	6.759	6.652	6.9964	6.398	5.7225	5.8292
-64.7	8.1212	8.1599	14.734	6.5257	6.759	6.652	6.9964	6.398	5.7225	5.8292
-64.6	8.1212	8.1599	14.734	6.5257	6.759	6.652	6.9964	6.398	5.7225	5.8292
-64.5	8.1212	8.1599	14.734	6.5257	6.759	6.652	6.9964	6.398	5.7225	5.8292
-64.4	8.1212	8.1599	14.734	6.5257	6.759	6.652	6.9964	6.398	5.7225	5.8292
-64.3	8.1212	8.1599	14.734	6.5257	6.759	6.652	6.9964	6.398	5.7225	5.8292
-64.2	8.1212	8.1599	14.734	6.5257	6.759	6.652	6.9964	6.398	5.7225	5.8292
-64.1	8.1212	8.1599	14.734	6.5257	6.759	6.652	6.9964	6.398	5.7225	5.8292
-64	8.1212	8.1599	14.734	6.5257	6.759	6.652	6.9964	6.398	5.7225	5.8292
-63.9	8.1212	8.1599	14.734	6.5257	6.759	6.652	6.9964	6.398	5.7225	5.8292
-63.8	8.1212	8.1599	14.734	6.5257	6.759	6.652	6.9964	6.398	5.7225	5.8292
-63.7	8.1212	8.1599	14.734	6.5257	6.759	6.652	6.9964	6.398	5.7225	5.8292
-63.6	8.1212	8.1599	14.734	6.5257	6.759	6.652	6.9964	6.398	5.7225	5.8292
-63.5	8.1212	8.1599	14.734	6.5257	6.759	6.652	6.9964	6.398	5.7225	5.8292
-63.4	8.1212	8.1599	14.734	6.5257	6.759	6.652	6.9964	6.398	5.7225	5.8292
-63.3	8.1212	8.1599	14.734	6.5257	6.759	6.652	6.9964	6.398	5.7225	5.8292
-63.2	8.1212	8.1599	14.734	6.5257	6.759	6.652	6.9964	6.398	5.7225	5.8292
-63.1	8.1212	8.1599	14.734	6.5257	6.759	6.652	6.9964	6.398	5.7225	5.8292
-63	8.1212	8.1599	14.734	6.5257	6.759	6.652	6.9964	6.398	5.7225	5.8292
-62.9	8.1212	8.1599	14.734	6.5257	6.759	6.652	6.9964	6.398	5.7225	5.8292
-62.8	8.1212	8.1599	14.734	6.5257	6.759	6.652	6.9964	6.398	5.7225	5.8292
-62.7	8.1212	8.1599	14.734	6.5257	6.759	6.652	6.9964	6.398	5.7225	5.8292
-62.6	8.1212	8.1599	14.734	6.5257	6.759	6.652	6.9964	6.398	5.7225	5.8292
-62.5	8.1212	8.1599	14.734	6.5257	6.759	6.652	6.9964	6.398	5.7225	5.8292
-62.4	8.1212	8.1599	14.734	6.5257	6.759	6.652	6.9964	6.398	5.7225	5.8292
-62.3	8.1212	8.1599	14.734	6.5257	6.759	6.652	6.9964	6.398	5.7225	5.8292
-62.2	8.1212	8.1599	14.734	6.5257	6.759	6.652	6.9964	6.398	5.7225	5.8292
-62.1	8.1212	8.1599	14.734	6.5257	6.759	6.652	6.9964	6.398	5.7225	5.8292
-62	8.1212	8.1599	14.734	6.5257	6.759	6.652	6.9964	6.398	5.7225	5.8292
-61.9	8.1212	8.1599	14.734	6.5257	6.759	6.652	6.9964	6.398	5.7225	5.8292
-61.8	8.1212	8.1599	14.734	6.5257	6.759	6.652	6.9964	6.398	5.7225	5.8292
-61.7	8.1212	8.1599	14.734	6.5257	6.759	6.652	6.9964	6.398	5.7225	5.8292
-61.6	8.1212	8.1599	14.734	6.5257	6.759	6.652	6.9964	6.398	5.7225	5.8292
-61.5	8.1212	8.1599	14.734	6.5257	6.759	6.652	6.9964	6.398	5.7225	5.8292
-61.4	8.1212	8.1599	14.734	6.5257	6.759	6.652	6.9964	6.398	5.7225	5.8292
-61.3	8.1212	8.1599	14.734	6.5257	6.759	6.652	6.9964	6.398	5.7225	5.8292
-61.2	8.1212	8.1599	14.734	6.5257	6.759	6.652	6.9964	6.398	5.7225	5.8292
-61.1	8.1212	8.1599	14.734	6.5257	6.759	6.652	6.9964	6.398	5.7225	5.8292
-61	8.1212	8.1599	14.734	6.5257	6.759	6.652	6.9964	6.398	5.7225	5.8292
-60.9	8.1212	8.1599	14.734	6.5257	6.759	6.652	6.9964	6.398	5.7225	5.8292
-60.8	8.1212	8.1599	14.734	6.5257	6.759	6.652	6.9964	6.398	5.7225	5.8292
-60.7	8.1212	8.1599	14.734	6.5257	6.759	6.652	6.9964	6.398	5.7225	5.8292
-60.6	8.1212	8.1599	14.734	6.5257	6.759	6.652	6.9964	6.398	5.7225	5.8292
-60.5	8.1212	8.1599	14.734	6.5257	6.759	6.652	6.9964	6.398	5.7225	5.8292
-60.4	8.1212	8.1599	14.734	6.5257	6.759	6.652	6.9964	6.398	5.7225	5.8292
-60.3	8.1212	8.1599	14.734	6.5257	6.759	6.652	6.9964	6.398	5.7225	5.8292
-60.2	8.1212	8.1599	14.734	6.5257	6.759	6.652	6.9964	6.398	5.7225	5.8292
-60.1	8.1212	8.1599	14.734	6.5257	6.759	6.652	6.9964	6.398	5.7225	5.8292
-60	8.1212	8.1599	14.734	6.5257	6.759	6.652	6.9964	6.398	5.7225	5.8292
-59.9	8.1212	8.1599	14.734	6.5257	6.759	6.652	6.9964	6.398	5.7225	5.8292
-59.8	8.1212	8.1599	14.734	6.5257	6.759	6.652	6.9964	6.398	5.7225	5.8292
-59.7	8.1212	8.1599	14.734	6.5257	6.759	6.652	6.9964	6.398	5.7225	5.8292
-59.6	8.1212	8.1599	14.734	6.5257	6.759	6.652	6.9964	6.398	5.7225	5.8292
-59.5	8.1212	8.1599	14.734	6.5257	6.759	6.652	6.9964	6.398	5.7225	5.8292
-59.4	8.1212	8.1599	14.734	6.5257	6.759	6.652	6.9964	6.398	5.7225	5.8292
-59.3	8.1212	8.1599	14.734	6.5257	6.759	6.652	6.9964	6.398	5.7225	5.8292
-59.2	8.1212	8.1599	14.734	6.5257	6.759	6.652	6.9964	6.398	5.7225	5.8292
-59.1	8.1212	8.1599	14.734	6.5257	6.759	6.652	6.9964	6.398	5.7225	5.8292
-59	8.1212	8.1599	14.734	6.5257	6.759	6.652	6.9964	6.398	5.7225	5.8292
-58.9	8.1212	8.1599	14.734	6.5257	6.759	6.652	6.9964	6.398	5.7225	5.8292
-58.8	8.1212	8.1599	14.734	6.5257	6.759	6.652	6.9964	6.398	5.7225	5.8292
-58.7	8.1212	8.1599	14.734	6.5257	6.759	6.652	6.9964	6.398	5.7225	5.8292
-58.6	8.1212	8.1599	14.734	6.5257	6.759	6.652	6.9964	6.398	5.7225	5.8292
-58.5	8.1212	8.1599	14.734	6.5257	6.759	6.652	6.9964	6.398	5.7225	5.8292
-58.4	8.1212	8.1599	14.734	6.5257	6.759	6.652	6.9964	6.398	5.7225	5.8292
-58.3	8.1212	8.1599	14.734	6.5257	6.759	6.652	6.9964	6.398	5.7225	5.8292
-58.2	8.1212	8.1599	14.734	6.5257	6.759	6.652	6.9964	6.398	5.7225	5.8292
-58.1	8.1212	8.1599	14.734	6.5257	6.759	6.652	6.9964	6.398	5.7225	5.8292
-58	8.1212	8.1599	14.734	6.5257	6.759	6.652	6.9964	6.398	5.7225	5.8292
-57.9	8.1212	8.1599	14.734	6.5257	6.759	6.652	6.9964	6.398	5.7225	5.8292
-57.8	8.1212	8.1599	14.734	6.5257	6.759	6.652	6.9964	6.398	5.7225	5.8292
-57.7	8.1212	8.1599	14.734	6.5257	6.759	6.652	6.9964	6.398	5.7225	5.8292
-57.6	8.1212	8.1599	14.734	6.5257	6.759	6.652	6.9964	6.398	5.7225	5.8292
-57.5	8.1212	8.1599	14.734	6.5257	6.759	6.652	6.9964	6.398	5.7225	5.8292
-57.4	8.1212	8.1599	14.734	6.5257	6.759	6.652	6.9964	6.398	5.7225	5.8292
-57.3	8.1212	8.1599	14.734	6.5257	6.759	6.652	6.9964	6.398	5.7225	5.8292
-57.2	8.1212	8.1599	14.734	6.5257	6.759	6.652	6.9964	6.398	5.7225	5.8292
-57.1	8.1212	8.1599	14.734	6.5257	6.759	6.652	6.9964	6.398	5.7225	5.8292
-57	8.1212	8.1599	14.734	6.5257	6.759	6.652	6.9964	6.398	5.7225	5.8292
-56.9	8.1212	8.1599	14.734	6.5257	6.759	6.652	6.9964	6.398	5.7225	5.8292
-56.8	8.1212	8.1599	14.734	6.5257	6.759	6.652	6.9964	6.398	5.7225	5.8292
-56.7	8.1212	8.1599	14.734	6.5257	6.759	6.652	6.9964	6.398	5.7225	5.8292
-56.6	8.1212	8.1599	14.734	6.5257	6.759	6.652	6.9964	6.398	5.7225	5.8292
-56.5	8.1212	8.1599	14.734	6.5257	6.759	6.652	6.9964	6.398	5.7225	5.8292
-56.4	8.1212	8.1599	14.734	6.5257	6.759	6.652	6.9964	6.398	5.7225	5.8292
-56.3	8.1212	8.1599	14.734	6.5257	6.759	6.652	6.9964	6.398	5.7225	5.8292
-56.2	8.1212	8.1599	14.734	6.5257	6.759	6.652	6.9964	6.398	5.7225	5.8292
-56.1	8.1212	8.1599	14.734	6.5257	6.759	6.652	6.9964	6.398	5.7225	5.8292
-56	8.1212	8.1599	14.734	6.5257	6.759	6.652	6.9964	6.398	5.7225	5.8292
-55.9	8.1212	8.1599	14.734	6.5257	6.759	6.652	6.9964	6.398	5.7225	5.8292
-55.8	8.1212	8.1599	14.734	6.5257	6.759	6.652	6.9964	6.398	5.7225	5.8292
-55.7	8.1212	8.1599	14.734	6.5257	6.759	6.652	6.9964	6.398	5.7225	5.8292
-55.6	8.1212	8.1599	14.734	6.5257	6.759	6.652	6.9964	6.398	5.7225	5.8292
-55.5	8.1212	8.1599	14.734	6.5257	6.759	6.652	6.9964	6.398	5.7225	5.8292
-55.4	8.1212	8.1599	14.734	6.5257	6.759	6.652	6.9964	6.398	5.7225	5.8292
-55.3	8.1212	8.1599	14.734	6.5257	6.759	6.652	6.9964	6.398	5.7225	5.8292
-55.2	8.1212	8.1599	14.734	6.5257	6.759	6.652	6.9964	6.398	5.7225	5.8292
-55.1	8.1212	8.1599	14.734	6.5257	6.759	6.652	6.9964	6.398	5.7225	5.8292
-55	8.1212	8.1599	14.734	6.5257	6.759	6.652	6.9964	6.398	5.7225	5.8292
-54.9	8.1212	8.1599	14.734	6.5257	6.759	6.652	6.9964	6.398	5.7225	5.8292
-54.8	8.1212	8.1599	14.734	6.5257	6.759	6.652	6.9964	6.398	5.7225	5.8292
-54.7	8.1212	8.1599	14.734	6.5257	6.759	6.652	6.9964	6.398	5.7225	5.8292
-54.6	8.1212	8.1599	14.734	6.5257	6.759	6.652	6.9964	6.398	5.7225	5.8292
-54.5	8.1212	8.1599	14.734	6.5257	6.759	6.652	6.9964	6.398	5.7225	5.8292
-54.4	8.1212	8.1599	14.734	6.5257	6.759	6.652	6.9964	6.398	5.7225	5.8292
-54.3	8.1212	8.1599	14.734	6.5257	6.759	6.652	6.9964	6.398	5.7225	5.8292
-54.2	8.1212	8.1599	14.734	6.5257	6.759	6.652	6.9964	6.398	5.7225	5.8292
-54.1	8.1212	8.1599	14.734	6.5257	6.759	6.652	6.9964	6.398	5.7225	5.8292
-54	8.1212	8.1599	14.734	6.5257	6.759	6.652	6.9964	6.398	5.7225	5.8292
-53.9	8.1212	8.1599	14.734	6.5257	6.759	6.652	6.9964	6.398	5.7225	5.8292
-53.8	8.1212	8.1599	14.734	6.5257	6.759	6.652	6.9964	6.398	5.7225	5.8292
-53.7	8.1212	8.1599	14.734	6.5257	6.759	6.652	6.9964	6.398	5.7225	5.8292
-53.6	8.1212	8.1599	14.734	6.5257	6.759	6.652	6.9964	6.398	5.7225	5.8292
-53.5	8.1212	8.1599	14.734	6.5257	6.759	6.652	6.9964	6.398	5.7225	5.8292
-53.4	8.1212	8.1599	14.734	6.5257	6.759	6.652	6.9964	6.398	5.7225	5.8292
-53.3	8.1212	8.1599	14.734	6.5257	6.759	6.652	6.9964	6.398	5.7225	5.8292
-53.2	8.1212	8.1599	14.734	6.5257	6.759	6.652	6.9964	6.398	5.7225	5.8292
-53.1	8.1212	8.1599	14.734	6.5257	6.759	6.652	6.9964	6.398	5.7225	5.8292
-53	8.1212	8.1599	14.734	6.5257	6.759	6.652	6.9964	6.398	5.7225	5.8292
-52.9	8.1212	8.1599	14.734	6.5257	6.759	6.652	6.9964	6.398	5.7225	5.8292
-52.8	8.1212	8.1599	14.734	6.5257	6.759	6.652	6.9964	6.398	5.7225	5.8292
-52.7	8.1212	8.1599	14.734	6.5257	6.759	6.652	6.9964	6.398	5.7225	5.8292
-52.6	8.1212	8.1599	14.734	6.5257	6.759	6.652	6.9964	6.398	5.7225	5.8292
-52.5	8.1212	8.1599	14.734	6.5257	6.759	6.652	6.9964	6.398	5.7225	5.8292
-52.4	8.1212	8.1599	14.734	6.5257	6.759	6.652	6.9964	6.398	5.7225	5.8292
-52.3	8.1212	8.1599	14.734	6.5257	6.759	6.652	6.9964	6.398	5.7225	5.8292
-52.2	8.1212	8.1599	14.734	6.5257	6.759	6.652	6.9964	6.398	5.7225	5.8292
-52.1	8.1212	8.1599	14.734	6.5257	6.759	6.652	6.9964	6.398	5.7225	5.8292
-52	8.1212	8.1599	14.734	6.5257	6.759	6.652	6.9964	6.398	5.7225	5.8292
-51.9	8.1212	8.1599	14.734	6.5257	6.759	6.652	6.9964	6.398	5.7225	5.8292
-51.8	8.1212	8.1599	14.734	6.5257	6.759	6.652	6.9964	6.398	5.7225	5.8292
-51.7	8.1212	8.1599	14.734	6.5257	6.759	6.652	6.9964	6.398	5.7225	5.8292
-51.6	8.1212	8.1599	14.734	6.5257	6.759	6.652	6.9964	6.398	5.7225	5.8292
-51.5	8.1212	8.1599	14.734	6.5257	6.759	6.652	6.9964	6.398	5.7225	5.8292
-51.4	8.1212	8.1599	14.734	6.5257	6.759	6.652	6.9964	6.398	5.7225	5.8292
-51.3	8.1212	8.1599	14.734	6.5257	6.759	6.652	6.9964	6.398	5.7225	5.8292
-51.2	8.1212	8.1599	14.734	6.5257	6.759	6.652	6.9964	6.398	5.7225	5.8292
-51.1	8.1212	8.1599	14.734	6.5257	6.759	6.652	6.9964	6.398	5.7225	5.8292
-51	8.1212	8.1599	14.734	6.5257	6.759	6.652	6.9964	6.398	5.7225	5.8292
-50.9	8.1212	8.1599	14.734	6.5257	6.759	6.652	6.9964	6.398	5.7225	5.8292
-50.8	8.1212	8.1599	14.734	6.5257	6.759	6.652	6.9964	6.398	5.7225	5.8292
-50.7	8.1212	8.1599	14.734	6.5257	6.759	6.652	6.9964	6.398	5.7225	5.8292
-50.6	8.1212	8.1599	14.734	6.5257	6.759	6.652	6.9964	6.398	5.7225	5.8292
-50.5	8.1212	8.1599	14.734	6.5257	6.759	6.652	6.9964	6.398	5.7225	5.8292
-50.4	8.1212	8.1599	14.734	6.5257	6.759	6.652	6.9964	6.398	5.7225	5.8292
-50.3	8.1212	8.1599	14.734	6.5257	6.759	6.652	6.9964	6.398	5.7225	5.8292
-50.2	8.1212	8.1599	14.734	6.5257	6.759	6.652	6.9964	6.398	5.7225	5.8292
-50.1	8.1212	8.1599	14.734	6.5257	6.759	6.652	6.9964	6.398	5.7225	5.8292
-50	8.1212	8.1599	14.734	6.5257	6.759	6.652	6.9964	6.398	5.7225	5.8292
-49.9	8.1212	8.1599	14.734	6.5257	6.759	6.652	6.9964	6.398	5.7225	5.8292
-49.8	8.1212	8.1599	14.734	6.5257	6.759	6.652	6.9964	6.398	5.7225	5.8292
-49.7	8.1212	8.1599	14.734	6.5257	6.759	6.652	6.9964	6.398	5.7225	5.8292
-49.6	8.1212	8.1599	14.734	6.5257	6.759	6.652	6.9964	6.398	5.7225	5.8292
-49.5	8.1212	8.1599	14.734	6.5257	6.759	6.652	6.9964	6.398	5.7225	5.8292
-49.4	8.1212	8.1599	14.734	6.5257	6.759	6.652	6.9964	6.398	5.7225	5.8292
-49.3	8.1212	8.1599	14.734	6.5257	6.759	6.652	6.9964	6.398	5.7225	5.8292
-49.2	8.1212	8.1599	14.734	6.5257	6.759	6.652	6.9964	6.398	5.7225	5.8292
-49.1	8.1212	8.1599	14.734	6.5257	6.759	6.652	6.9964	6.398	5.7225	5.8292
-49	8.1212	8.1599	14.734	6.5257	6.759	6.652	6.9964	6.398	5.7225	5.8292
-48.9	8.1212	8.1599	14.734	6.5257	6.759	6.652	6.9964	6.398	5.7225	5.8292
-48.8	8.1212	8.1599	14.734	6.5257	6.759	6.652	6.9964	6.398	5.7225	5.8292
-48.7	8.1212	8.1599	14.734	6.5257	6.759	6.652	6.9964	6.398	5.7225	5.8292
-48.6	8.1212	8.1599	14.734	6.5257	6.759	6.652	6.9964	6.398	5.7225	5.8292
-48.5	8.1212	8.1599	14.734	6.5257	6.759	6.652	6.9964	6.398	5.7225	5.8292
-48.4	8.1212	8.1599	14.734	6.5257	6.759	6.652	6.9964	6.398	5.7225	5.8292
-48.3	8.1212	8.1599	14.734	6.5257	6.759	6.652	6.9964	6.398	5.7225	5.8292
-48.2	8.1212	8.1599	14.734	6.5257	6.759	6.652	6.9964	6.398	5.7225	5.8292
-48.1	8.1212	8.1599	14.734	6.5257	6.759	6.652	6.9964	6.398	5.7225	5.8292
-48	8.1212	8.1599	14.734	6.5257	6.759	6.652	6.9964	6.398	5.7225	5.8292
-47.9	8.1212	8.1599	14.734	6.5257	6.759	6.652	6.9964	6.398	5.7225	5.8292
-47.8	8.1212	8.1599	14.734	6.5257	6.759	6.652	6.9964	6.398	5.7225	5.8292
-47.7	8.1212	8.1599	14.734	6.5257	6.759	6.652	6.9964	6.398	5.7225	5.8292
-47.6	8.1212	8.1599	14.734	6.5257	6.759	6.652	6.9964	6.398	5.7225	5.8292
-47.5	8.1212	8.1599	14.734	6.5257	6.759	6.652	6.9964	6.398	5.7225	5.8292
-47.4	8.1212	8.1599	14.734	6.5257	6.759	6.652	6.9964	6.398	5.7225	5.8292
-47.3	8.1212	8.1599	14.734	6.5257	6.759	6.652	6.9964	6.398	5.7225	5.8292
-47.2	8.1212	8.1599	14.734	6.5257	6.759	6.652	6.9964	6.398	5.7225	5.8292
-47.1	8.1212	8.1599	14.734	6.5257	6.759	6.652	6.9964	6.398	5.7225	5.8292
-47	8.1212	8.1599	14.734	6.5257	6.759	6.652	6.9964	6.398	5.7225	5.8292
-46.9	8.1212	8.1599	14.734	6.5257	6.759	6.652	6.9964	6.398	5.7225	5.8292
-46.8	8.1212	8.1599	14.734	6.5257	6.759	6.652	6.9964	6.398	5.7225	5.8292
-46.7	8.1212	8.1599	14.734	6.5257	6.759	6.652	6.9964	6.398	5.7225	5.8292
-46.6	8.1212	8.1599	14.734	6.5257	6.759	6.652	6.9964	6.398	5.7225	5.8292
-46.5	8.1212	8.1599	14.734	6.5257	6.759	6.652	6.9964	6.398	5.7225	5.8292
-46.4	8.1212	8.1599	14.734	6.5257	6.759	6.652	6.9964	6.398	5.7225	5.8292
-46.3	8.1212	8.1599	14.734	6.5257	6.759	6.652	6.9964	6.398	5.7225	5.8292
-46.2	8.1212	8.1599	14.734	6.5257	6.759	6.652	6.9964	6.398	5.7225	5.8292
-46.1	8.1212	8.1599	14.734	6.5257	20.313	6.652	6.9964	6.398	5.7225	5.8292
-46	8.1212	8.1599	14.734	6.5257	20.313	6.652	6.9964	6.398	5.7225	5.8292
-45.9	8.1212	8.1599	14.734	6.5257	20.313	6.652	6.9964	6.398	5.7225	5.8292
-45.8	8.1212	8.1599	14.734	6.5257	20.313	6.652	6.9964	6.398	5.7225	5.8292
-45.7	8.1212	8.1599	14.734	6.5257	20.313	6.652	6.9964	6.398	5.7225	5.8292
-45.6	8.1212	8.1599	14.734	6.5257	20.313	6.652	6.9964	6.398	5.7225	5.8292
-45.5	8.1212	8.1599	14.734	6.5257	20.313	6.652	6.9964	6.398	5.7225	5.8292
-45.4	8.1212	8.1599	14.734	6.5257	20.313	6.652	6.9964	6.398	5.7225	5.8292
-45.3	8.1212	8.1599	14.734	6.5257	20.313	6.652	6.9964	6.398	5.7225	5.8292
-45.2	8.1212	8.1599	14.734	6.5257	20.313	6.652	6.9964	6.398	5.7225	5.8292
-45.1	8.1212	8.1599	14.734	6.5257	20.313	6.652	6.9964	6.398	5.7225	5.8292
-45	8.1212	8.1599	14.734	6.5257	20.313	6.652	6.9964	6.398	5.7225	5.8292
-44.9	8.1212	8.1599	14.734	6.5257	20.313	6.652	6.9964	6.398	5.7225	5.8292
-44.8	8.1212	8.1599	14.734	6.5257	20.313	6.652	6.9964	6.398	5.7225	5.8292
-44.7	8.1212	8.1599	14.734	6.5257	20.313	6.652	6.9964	6.398	5.7225	5.8292
-44.6	8.1212	8.1599	14.734	6.5257	20.313	6.652	6.9964	6.398	5.7225	5.8292
-44.5	8.1212	8.1599	14.734	6.5257	20.313	6.652	6.9964	6.398	5.7225	5.8292
-44.4	8.1212	8.1599	14.734	6.5257	20.313	6.652	6.9964	6.398	5.7225	5.8292
-44.3	8.1212	8.1599	14.734	6.5257	20.313	6.652	6.9964	6.398	5.7225	5.8292
-44.2	8.1212	8.1599	14.734	6.5257	20.313	6.652	6.9964	6.398	5.7225	5.8292
-44.1	8.1212	8.1599	14.734	6.5257	20.313	6.652	6.9964	6.398	5.7225	5.8292
-44	8.1212	8.1599	14.734	6.5257	20.313	6.652	6.9964	6.398	5.7225	5.8292
-43.9	8.1212	8.1599	14.734	6.5257	20.313	6.652	6.9964	6.398	5.7225	5.8292
-43.8	8.1212	8.1599	14.734	6.5257	20.313	6.652	6.9964	6.398	5.7225	5.8292
-43.7	8.1212	8.1599	14.734	6.5257	20.313	6.652	6.9964	6.398	5.7225	5.8292
-43.6	8.1212	8.1599	14.734	6.5257	20.313	6.652	6.9964	6.398	5.7225	5.8292
-43.5	8.1212	8.1599	14.734	6.5257	20.313	6.652	6.9964	6.398	5.7225	5.8292
-43.4	8.1212	8.1599	14.734	6.5257	20.313	6.652	6.9964	6.398	5.7225	5.8292
-43.3	8.1212	8.1599	14.734	6.5257	20.313	6.652	6.9964	6.398	5.7225	5.8292
-43.2	8.1212	8.1599	14.734	6.5257	20.313	6.652	6.9964	6.398	5.7225	5.8292
-43.1	8.1212	8.1599	14.734	6.5257	20.313	6.652	6.9964	6.398	5.7225	5.8292
-43	8.1212	8.1599	14.734	6.5257	20.313	6.652	6.9964	6.398	5.7225	5.8292
-42.9	8.1212	8.1599	14.734	6.5257	20.313	6.652	6.9964	6.398	5.7225	5.8292
-42.8	8.1212	8.1599	14.734	6.5257	20.313	6.652	6.9964	6.398	5.7225	5.8292
-42.7	8.1212	8.1599	14.734	6.5257	20.313	6.652	6.9964	6.398	5.7225	5.8292
-42.6	8.1212	8.1599	14.734	6.5257	20.313	6.652	6.9964	6.398	5.7225	5.8292
-42.5	8.1212	8.1599	14.734	6.5257	20.313	6.652	6.9964	6.398	5.7225	5.8292
-42.4	8.1212	8.1599	14.734	6.5257	20.313	6.652	6.9964	6.398	5.7225	5.8292
-42.3	8.1212	8.1599	14.734	6.5257	20.313	6.652	6.9964	6.398	5.7225	5.8292
-42.2	8.1212	8.1599	14.734	6.5257	20.313	6.652	6.9964	6.398	5.7225	5.8292
-42.1	8.1212	8.1599	14.734	6.5257	20.313	6.652	6.9964	6.398	5.7225	5.8292
-42	8.1212	8.1599	14.734	6.5257	20.313	6.652	6.9964	6.398	5.7225	5.8292
-41.9	8.1212	8.1599	14.734	6.5257	20.313	6.652	6.9964	6.398	5.7225	5.8292
-41.8	8.1212	8.1599	14.734	6.5257	20.313	6.652	6.9964	6.398	5.7225	5.8292
-41.7	8.1212	8.1599	14.734	6.5257	20.313	6.652	6.9964	6.398	5.7225	5.8292
-41.6	8.1212	8.1599	14.734	6.5257	20.313	6.652	6.9964	6.398	5.7225	5.8292
-41.5	8.1212	8.1599	14.734	6.5257	20.313	6.652	6.9964	6.398	5.7225	5.8292
-41.4	8.1212	8.1599	14.734	6.5257	20.313	6.652	6.9964	6.398	5.7225	5.8292
-41.3	8.1212	8.1599	14.734	6.5257	20.313	6.652	6.9964	6.398	5.7225	5.8292
-41.2	8.1212	8.1599	14.734	6.5257	20.313	6.652	6.9964	6.398	5.7225	5.8292
-41.1	8.1212	8.1599	14.734	6.5257	20.313	6.652	6.9964	6.398	5.7225	5.8292
-41	8.1212	8.1599	14.734	6.5257	20.313	6.652	6.9964	6.398	5.7225	5.8292
-40.9	8.1212	8.1599	14.734	6.5257	20.313	6.652	6.9964	6.398	5.7225	5.8292
-40.8	8.1212	8.1599	14.734	6.5257	20.313	6.652	6.9964	6.398	5.7225	5.8292
-40.7	8.1212	8.1599	14.734	6.5257	20.313	6.652	6.9964	6.398	5.7225	5.8292
-40.6	8.1212	8.1599	14.734	6.5257	20.313	6.652	6.9964	6.398	5.7225	5.8292
-40.5	8.1212	8.1599	14.734	6.5257	20.313	6.652	6.9964	6.398	5.7225	5.8292
-40.4	8.1212	8.1599	14.734	6.5257	20.313	6.652	6.9964	6.398	5.7225	5.8292
-40.3	8.1212	8.1599	14.734	6.5257	20.313	6.652	6.9964	6.398	5.7225	5.8292
-40.2	8.1212	8.1599	14.734	6.5257	20.313	6.652	6.9964	6.398	5.7225	5.8292
-40.1	8.1212	8.1599	14.734	6.5257	20.313	6.652	6.9964	6.398	5.7225	5.8292
-40	8.1212	8.1599	14.734	6.5257	20.313	6.652	6.9964	6.398	5.7225	5.8292
-39.9	8.1212	8.1599	14.734	6.5257	20.313	6.652	6.9964	6.398	5.7225	5.8292
-39.8	8.1212	8.1599	14.734	6.5257	20.313	6.652	6.9964	6.398	5.7225	5.8292
-39.7	8.1212	8.1599	14.734	6.5257	20.313	6.652	6.9964	6.398	5.7225	5.8292
-39.6	8.1212	8.1599	14.734	6.5257	20.313	6.652	6.9964	6.398	5.7225	5.8292
-39.5	8.1212	8.1599	14.734	6.5257	20.313	6.652	6.9964	6.398	5.7225	5.8292
-39.4	8.1212	8.1599	14.734	6.5257	20.313	6.652	6.9964	6.398	5.7225	5.8292
-39.3	8.1212	8.1599	14.734	6.5257	20.313	6.652	6.9964	6.398	5.7225	5.8292
-39.2	8.1212	8.1599	14.734	6.5257	20.313	6.652	6.9964	6.398	5.7225	5.8292
-39.1	8.1212	8.1599	14.734	6.5257	20.313	6.652	6.9964	6.398	5.7225	5.8292
-39	8.1212	8.1599	14.734	6.5257	20.313	6.652	6.9964	6.398	5.7225	5.8292
-38.9	8.1212	8.1599	14.734	6.5257	20.313	6.652	6.9964	6.398	5.7225	5.8292
-38.8	8.1212	8.1599	14.734	6.5257	20.313	6.652	6.9964	6.398	5.7225	5.8292
-38.7	8.1212	8.1599	14.734	6.5257	20.313	6.652	6.9964	6.398	5.7225	5.8292
-38.6	8.1212	8.1599	14.734	6.5257	20.313	6.652	6.9964	6.398	5.7225	5.8292
-38.5	8.1212	8.1599	14.734	6.5257	20.313	6.652	6.9964	6.398	5.7225	5.8292
-38.4	8.1212	8.1599	14.734	6.5257	20.313	6.652	6.9964	6.398	5.7225	5.8292
-38.3	8.1212	8.1599	14.734	6.5257	20.313	6.652	6.9964	6.398	5.7225	5.8292
-38.2	8.1212	8.1599	14.734	6.5257	20.313	6.652	6.9964	6.398	5.7225	5.8292
-38.1	8.1212	8.1599	14.734	6.5257	20.313	6.652	6.9964	6.398	5.7225	5.8292
-38	8.1212	8.1599	14.734	6.5257	20.313	6.652	6.9964	6.398	5.7225	5.8292
-37.9	8.1212	8.1599	14.734	6.5257	20.313	6.652	6.9964	6.398	5.7225	5.8292
-37.8	8.1212	8.1599	14.734	6.5257	20.313	6.652	6.9964	6.398	5.7225	5.8292
-37.7	8.1212	8.1599	14.734	6.5257	20.313	6.652	6.9964	6.398	5.7225	5.8292
-37.6	8.1212	8.1599	14.734	6.5257	20.313	6.652	6.9964	6.398	5.7225	5.8292
-37.5	8.1212	8.1599	14.734	6.5257	20.313	6.652	6.9964	6.398	5.7225	5.8292
-37.4	8.1212	8.1599	14.734	6.5257	20.313	6.652	6.9964	6.398	5.7225	5.8292
-37.3	8.1212	8.1599	14.734	6.5257	20.313	6.652	6.9964	6.398	5.7225	5.8292
-37.2	8.1212	8.1599	14.734	6.5257	20.313	6.652	6.9964	6.398	5.7225	5.8292
-37.1	8.1212	8.1599	14.734	6.5257	20.313	6.652	6.9964	6.398	5.7225	5.8292
-37	8.1212	8.1599	14.734	6.5257	20.313	6.652	6.9964	6.398	5.7225	5.8292
-36.9	8.1212	8.1599	14.734	6.5257	20.313	6.652	6.9964	6.398	5.7225	5.8292
-36.8	8.1212	8.1599	14.734	6.5257	20.313	6.652	6.9964	6.398	5.7225	5.8292
-36.7	8.1212	8.1599	14.734	6.5257	20.313	6.652	6.9964	6.398	5.7225	5.8292
-36.6	8.1212	8.1599	14.734	6.5257	20.313	6.652	6.9964	6.398	5.7225	5.8292
-36.5	8.1212	8.1599	14.734	6.5257	20.313	6.652	6.9964	6.398	5.7225	5.8292
-36.4	8.1212	8.1599	14.734	6.5257	20.313	6.652	6.9964	6.398	5.7225	5.8292
-36.3	8.1212	8.1599	14.734	6.5257	20.313	6.652	6.9964	6.398	5.7225	5.8292
-36.2	8.1212	8.1599	14.734	6.5257	20.313	6.652	6.9964	6.398	5.7225	5.8292
-36.1	8.1212	8.1599	14.734	6.5257	20.313	6.652	6.9964	6.398	5.7225	5.8292
-36	8.1212	8.1599	14.734	6.5257	20.313	6.652	6.9964	6.398	5.7225	5.8292
-35.9	8.1212	8.1599	14.734	6.5257	20.313	6.652	6.9964	6.398	5.7225	5.8292
-35.8	8.1212	8.1599	14.734	6.5257	20.313	6.652	6.9964	6.398	5.7225	5.8292
-35.7	8.1212	8.1599	14.734	6.5257	20.313	6.652	6.9964	6.398	5.7225	5.8292
-35.6	8.1212	8.1599	14.734	6.5257	20.313	6.652	6.9964	6.398	5.7225	5.8292
-35.5	8.1212	8.1599	14.734	6.5257	20.313	6.652	6.9964	6.398	5.7225	5.8292
-35.4	8.1212	8.1599	14.734	6.5257	20.313	6.652	6.9964	6.398	5.7225	5.8292
-35.3	8.1212	8.1599	14.734	6.5257	20.313	6.652	6.9964	6.398	5.7225	5.8292
-35.2	8.1212	8.1599	14.734	6.5257	20.313	6.652	6.9964	6.398	5.7225	5.8292
-35.1	8.1212	8.1599	14.734	6.5257	20.313	6.652	6.9964	6.398	5.7225	5.8292
-35	8.1212	8.1599	14.734	6.5257	20.313	6.652	6.9964	6.398	5.7225	5.8292
-34.9	8.1212	8.1599	14.734	6.5257	20.313	6.652	6.9964	6.398	5.7225	5.8292
-34.8	8.1212	8.1599	14.734	6.5257	20.313	6.652	6.9964	6.398	5.7225	5.8292
-34.7	8.1212	8.1599	14.734	6.5257	20.313	6.652	6.9964	6.398	5.7225	5.8292
-34.6	8.1212	8.1599	14.734	6.5257	20.313	6.652	6.9964	6.398	5.7225	5.8292
-34.5	8.1212	8.1599	14.734	6.5257	20.313	6.652	6.9964	6.398	5.7225	5.8292
-34.4	8.1212	8.1599	14.734	6.5257	20.313	6.652	6.9964	6.398	5.7225	5.8292
-34.3	8.1212	8.1599	14.734	6.5257	20.313	6.652	6.9964	6.398	5.7225	5.8292
-34.2	8.1212	8.1599	14.734	6.5257	20.313	6.652	6.9964	6.398	5.7225	5.8292
-34.1	8.1212	8.1599	14.734	6.5257	20.313	6.652	6.9964	6.398	5.7225	5.8292
-34	8.1212	8.1599	14.734	6.5257	20.313	6.652	6.9964	6.398	5.7225	5.8292
-33.9	8.1212	8.1599	14.734	6.5257	20.313	6.652	6.9964	6.398	5.7225	5.8292
-33.8	8.1212	8.1599	14.734	6.5257	20.313	6.652	6.9964	6.398	5.7225	5.8292
-33.7	8.1212	8.1599	14.734	6.5257	20.313	6.652	6.9964	6.398	5.7225	5.8292
-33.6	8.1212	8.1599	14.734	6.5257	20.313	6.652	6.9964	6.398	5.7225	5.8292
-33.5	8.1212	8.1599	14.734	6.5257	20.313	6.652	6.9964	6.398	5.7225	5.8292
-33.4	8.1212	8.1599	14.734	6.5257	20.313	6.652	6.9964	6.398	5.7225	5.8292
-33.3	8.1212	8.1599	14.734	6.5257	20.313	6.652	6.9964	6.398	5.7225	5.8292
-33.2	8.1212	8.1599	14.734	6.5257	20.313	6.652	6.9964	6.398	5.7225	5.8292
-33.1	8.1212	8.1599	14.734	6.5257	20.313	6.652	6.9964	6.398	5.7225	5.8292
-33	8.1212	8.1599	14.734	6.5257	20.313	6.652	6.9964	6.398	5.7225	5.8292
-32.9	8.1212	8.1599	14.734	6.5257	20.313	6.652	6.9964	6.398	5.7225	5.8292
-32.8	8.1212	8.1599	14.734	6.5257	20.313	6.652	6.9964	6.398	5.7225	5.8292
-32.7	8.1212	8.1599	14.734	6.5257	20.313	6.652	6.9964	6.398	5.7225	5.8292
-32.6	8.1212	8.1599	14.734	6.5257	20.313	6.652	6.9964	6.398	5.7225	5.8292
-32.5	8.1212	8.1599	14.734	6.5257	20.313	6.652	6.9964	6.398	5.7225	5.8292
-32.4	8.1212	8.1599	14.734	6.5257	20.313	6.652	6.9964	6.398	5.7225	5.8292
-32.3	8.1212	8.1599	14.734	6.5257	20.313	6.652	6.9964	6.398	5.7225	5.8292
-32.2	8.1212	8.1599	14.734	6.5257	20.313	6.652	6.9964	6.398	5.7225	5.8292
-32.1	8.1212	8.1599	14.734	6.5257	20.313	6.652	6.9964	6.398	5.7225	5.8292
-32	8.1212	8.1599	14.734	6.5257	20.313	6.652	6.9964	6.398	5.7225	5.8292
-31.9	8.1212	8.1599	14.734	6.5257	20.313	6.652	6.9964	6.398	5.7225	5.8292
-31.8	8.1212	8.1599	14.734	6.5257	20.313	6.652	6.9964	6.398	5.7225	5.8292
-31.7	8.1212	8.1599	14.734	6.5257	20.313	6.652	6.9964	6.398	5.7225	5.8292
-31.6	8.1212	8.1599	14.734	6.5257	20.313	6.652	6.9964	6.398	5.7225	5.8292
-31.5	8.1212	8.1599	14.734	6.5257	20.313	6.652	6.9964	6.398	5.7225	5.8292
-31.4	8.1212	8.1599	14.734	6.5257	20.313	6.652	6.9964	6.398	5.7225	5.8292
-31.3	8.1212	8.1599	14.734	6.5257	20.313	6.652	6.9964	6.398	5.7225	5.8292
-31.2	8.1212	8.1599	14.734	6.5257	20.313	6.652	6.9964	6.398	5.7225	5.8292
-31.1	8.1212	8.1599	14.734	6.5257	20.313	6.652	6.9964	6.398	5.7225	5.8292
-31	8.1212	8.1599	14.734	6.5257	20.313	6.652	6.9964	6.398	5.7225	5.8292
-30.9	8.1212	8.1599	14.734	6.5257	20.313	6.652	6.9964	6.398	5.7225	5.8292
-30.8	8.1212	8.1599	14.734	6.5257	20.313	6.652	6.9964	6.398	5.7225	5.8292
-30.7	8.1212	8.1599	14.734	6.5257	20.313	6.652	6.9964	6.398	5.7225	5.8292
-30.6	8.1212	8.1599	14.734	6.5257	20.313	6.652	6.9964	6.398	5.7225	5.8292
-30.5	8.1212	8.1599	14.734	6.5257	20.313	6.652	6.9964	6.398	5.7225	5.8292
-30.4	8.1212	8.1599	14.734	6.5257	20.313	6.652	6.9964	6.398	5.7225	5.8292
-30.3	8.1212	8.1599	14.734	6.5257	20.313	6.652	6.9964	6.398	5.7225	5.8292
-30.2	8.1212	8.1599	14.734	6.5257	20.313	6.652	6.9964	6.398	5.7225	5.8292
-30.1	8.1212	8.1599	14.734	6.5257	20.313	6.652	6.9964	6.398	5.7225	5.8292
-30	8.1212	8.1599	14.734	6.5257	20.313	6.652	6.9964	6.398	5.7225	5.8292
-29.9	8.1212	8.1599	14.734	6.5257	20.313	6.652	6.9964	6.398	5.7225	5.8292
-29.8	8.1212	8.1599	14.734	6.5257	20.313	6.652	6.9964	6.398	5.7225	5.8292
-29.7	8.1212	8.1599	14.734	6.5257	20.313	6.652	6.9964	6.398	5.7225	5.8292
-29.6	8.1212	8.1599	14.734	6.5257	20.313	6.652	6.9964	6.398	5.7225	5.8292
-29.5	8.1212	8.1599	14.734	6.5257	20.313	6.652	6.9964	6.398	5.7225	5.8292
-29.4	8.1212	8.1599	14.734	6.5257	20.313	6.652	6.9964	6.398	5.7225	5.8292
-29.3	8.1212	8.1599	14.734	6.5257	20.313	6.652	6.9964	6.398	5.7225	5.8292
-29.2	8.1212	8.1599	14.734	6.5257	20.313	6.652	6.9964	6.398	5.7225	5.8292
-29.1	8.1212	8.1599	14.734	6.5257	20.313	6.652	6.9964	6.398	5.7225	5.8292
-29	8.1212	8.1599	14.734	6.5257	20.313	6.652	6.9964	6.398	5.7225	5.8292
-28.9	8.1212	8.1599	14.734	6.5257	20.313	6.652	6.9964	6.398	5.7225	5.8292
-28.8	8.1212	8.1599	14.734	6.5257	20.313	6.652	6.9964	6.398	5.7225	5.8292
-28.7	8.1212	8.1599	14.734	6.5257	20.313	6.652	6.9964	6.398	5.7225	5.8292
-28.6	8.1212	8.1599	14.734	6.5257	20.313	6.652	6.9964	6.398	5.7225	5.8292
-28.5	8.1212	8.1599	14.734	6.5257	20.313	6.652	6.9964	6.398	5.7225	5.8292
-28.4	8.1212	8.1599	14.734	6.5257	20.313	6.652	6.9964	6.398	5.7225	5.8292
-28.3	8.1212	8.1599	14.734	6.5257	20.313	6.652	6.9964	6.398	5.7225	5.8292
-28.2	8.1212	8.1599	14.734	6.5257	20.313	6.652	6.9964	6.398	5.7225	5.8292
-28.1	8.1212	8.1599	14.734	6.5257	20.313	6.652	6.9964	6.398	5.7225	5.8292
-28	8.1212	8.1599	14.734	6.5257	20.313	6.652	6.9964	6.398	5.7225	5.8292
-27.9	8.1212	8.1599	14.734	6.5257	20.313	6.652	6.9964	6.398	5.7225	5.8292
-27.8	8.1212	8.1599	14.734	6.5257	20.313	6.652	6.9964	6.398	5.7225	5.8292
-27.7	8.1212	8.1599	14.734	6.5257	20.313	6.652	6.9964	6.398	5.7225	5.8292
-27.6	8.1212	8.1599	14.734	6.5257	20.313	6.652	6.9964	6.398	5.7225	5.8292
-27.5	8.1212	8.1599	14.734	6.5257	20.313	6.652	6.9964	6.398	5.7225	5.8292
-27.4	8.1212	8.1599	14.734	6.5257	20.313	6.652	6.9964	6.398	5.7225	5.8292
-27.3	8.1212	8.1599	14.734	6.5257	20.313	6.652	6.9964	6.398	5.7225	5.8292
-27.2	8.1212	8.1599	14.734	6.5257	20.313	6.652	6.9964	6.398	5.7225	5.8292
-27.1	8.1212	8.1599	14.734	6.5257	20.313	6.652	6.9964	6.398	5.7225	5.8292
-27	8.1212	8.1599	14.734	6.5257	20.313	6.652	6.9964	6.398	5.7225	5.8292
-26.9	8.1212	8.1599	14.734	6.5257	20.313	6.652	6.9964	6.398	5.7225	5.8292
-26.8	8.1212	8.1599	14.734	6.5257	20.313	6.652	6.9964	6.398	5.7225	5.8292
-26.7	8.1212	8.1599	14.734	6.5257	20.313	6.652	6.9964	6.398	5.7225	5.8292
-26.6	8.1212	8.1599	14.734	6.5257	20.313	6.652	6.9964	6.398	5.7225	5.8292
-26.5	8.1212	8.1599	14.734	6.5257	20.313	6.652	6.9964	6.398	5.7225	5.8292
-26.4	8.1212	8.1599	14.734	6.5257	20.313	6.652	6.9964	6.398	5.7225	5.8292
-26.3	8.1212	8.1599	14.734	6.5257	20.313	6.652	6.9964	6.398	5.7225	5.8292
-26.2	8.1212	8.1599	14.734	6.5257	20.313	6.652	6.9964	6.398	5.7225	5.8292
-26.1	8.1212	8.1599	14.734	6.5257	20.313	6.652	6.9964	6.398	5.7225	5.8292
-26	8.1212	8.1599	14.734	6.5257	20.313	6.652	6.9964	6.398	5.7225	5.8292
-25.9	8.1212	8.1599	14.734	6.5257	20.313	6.652	6.9964	6.398	5.7225	5.8292
-25.8	8.1212	8.1599	14.734	6.5257	20.313	6.652	6.9964	6.398	5.7225	5.8292
-25.7	8.1212	8.1599	14.734	6.5257	20.313	6.652	6.9964	6.398	5.7225	5.8292
-25.6	8.1212	8.1599	14.734	6.5257	20.313	6.652	6.9964	6.398	5.7225	5.8292
-25.5	8.1212	8.1599	14.734	6.5257	20.313	6.652	6.9964	6.398	5.7225	5.8292
-25.4	8.1212	8.1599	14.734	6.5257	20.313	6.652	6.9964	6.398	5.7225	5.8292
-25.3	8.1212	8.1599	14.734	6.5257	20.313	6.652	6.9964	6.398	5.7225	5.8292
-25.2	8.1212	8.1599	14.734	6.5257	20.313	6.652	6.9964	6.398	5.7225	5.8292
-25.1	8.1212	8.1599	14.734	6.5257	20.313	6.652	6.9964	6.398	5.7225	5.8292
-25	8.1212	8.1599	14.734	6.5257	20.313	6.652	6.9964	6.398	5.7225	5.8292
-24.9	8.1212	8.1599	14.734	6.5257	20.313	6.652	6.9964	6.398	5.7225	5.8292
-24.8	8.1212	8.1599	14.734	6.5257	20.313	6.652	6.9964	6.398	5.7225	5.8292
-24.7	8.1212	8.1599	14.734	6.5257	20.313	6.652	6.9964	6.398	5.7225	5.8292
-24.6	8.1212	8.1599	14.734	6.5257	20.313	6.652	6.9964	6.398	5.7225	5.8292
-24.5	8.1212	8.1599	14.734	6.5257	20.313	6.652	6.9964	6.398	5.7225	5.8292
-24.4	8.1212	8.1599	14.734	6.5257	20.313	6.652	6.9964	6.398	5.7225	5.8292
-24.3	8.1212	8.1599	14.734	6.5257	20.313	6.652	6.9964	6.398	5.7225	5.8292
-24.2	8.1212	8.1599	14.734	6.5257	20.313	6.652	6.9964	6.398	5.7225	5.8292
-24.1	8.1212	8.1599	14.734	6.5257	20.313	6.652	6.9964	6.398	5.7225	5.8292
-24	8.1212	8.1599	14.734	6.5257	20.313	6.652	6.9964	6.398	5.7225	5.8292
-23.9	8.1212	8.1599	14.734	6.5257	20.313	6.652	6.9964	6.398	5.7225	5.8292
-23.8	8.1212	8.1599	14.734	6.5257	20.313	6.652	6.9964	6.398	5.7225	5.8292
-23.7	8.1212	8.1599	14.734	6.5257	20.313	6.652	6.9964	6.398	5.7225	5.8292
-23.6	8.1212	8.1599	14.734	6.5257	20.313	6.652	6.9964	6.398	5.7225	5.8292
-23.5	8.1212	8.1599	14.734	6.5257	20.313	6.652	6.9964	6.398	5.7225	5.8292
-23.4	8.1212	8.1599	14.734	6.5257	20.313	6.652	6.9964	6.398	5.7225	5.8292
-23.3	8.1212	8.1599	14.734	6.5257	20.313	6.652	6.9964	6.398	5.7225	5.8292
-23.2	8.1212	8.1599	14.734	6.5257	20.313	6.652	6.9964	6.398	5.7225	5.8292
-23.1	8.1212	8.1599	14.734	6.5257	20.313	6.652	6.9964	6.398	37.523	5.8292
-23	8.1212	8.1599	14.734	6.5257	20.313	6.652	6.9964	6.398	37.523	5.8292
-22.9	8.1212	8.1599	14.734	6.5257	20.313	6.652	6.9964	6.398	37.523	5.8292
-22.8	8.1212	8.1599	14.734	6.5257	20.313	6.652	6.9964	6.398	37.523	5.8292
-22.7	8.1212	8.1599	14.734	6.5257	20.313	6.652	6.9964	6.398	37.523	5.8292
-22.6	8.1212	8.1599	14.734	6.5257	20.313	6.652	6.9964	6.398	37.523	5.8292
-22.5	8.1212	8.1599	14.734	6.5257	20.313	6.652	6.9964	6.398	37.523	5.8292
-22.4	8.1212	8.1599	14.734	6.5257	20.313	6.652	6.9964	6.398	37.523	5.8292
-22.3	8.1212	8.1599	14.734	6.5257	20.313	6.652	6.9964	6.398	37.523	5.8292
-22.2	8.1212	8.1599	14.734	6.5257	20.313	6.652	6.9964	6.398	37.523	5.8292
-22.1	8.1212	8.1599	14.734	6.5257	20.313	6.652	6.9964	6.398	37.523	5.8292
-22	8.1212	8.1599	14.734	6.5257	20.313	6.652	6.9964	6.398	37.523	5.8292
-21.9	8.1212	8.1599	14.734	6.5257	20.313	6.652	6.9964	6.398	37.523	5.8292
-21.8	8.1212	8.1599	14.734	6.5257	20.313	6.652	6.9964	6.398	37.523	5.8292
-21.7	8.1212	8.1599	14.734	6.5257	20.313	6.652	6.9964	6.398	37.523	5.8292
-21.6	8.1212	8.1599	14.734	6.5257	20.313	6.652	6.9964	6.398	37.523	5.8292
-21.5	8.1212	8.1599	14.734	6.5257	20.313	6.652	6.9964	6.398	37.523	5.8292
-21.4	8.1212	8.1599	14.734	6.5257	20.313	6.652	6.9964	6.398	37.523	5.8292
-21.3	8.1212	8.1599	14.734	6.5257	20.313	6.652	6.9964	6.398	37.523	5.8292
-21.2	8.1212	8.1599	14.734	6.5257	20.313	6.652	6.9964	6.398	37.523	5.8292
-21.1	8.1212	8.1599	14.734	6.5257	20.313	6.652	6.9964	6.398	37.523	5.8292
-21	8.1212	8.1599	14.734	6.5257	20.313	6.652	6.9964	6.398	37.523	5.8292
-20.9	8.1212	8.1599	14.734	6.5257	20.313	6.652	6.9964	6.398	37.523	5.8292
-20.8	8.1212	8.1599	14.734	6.5257	20.313	6.652	6.9964	6.398	37.523	5.8292
-20.7	8.1212	8.1599	14.734	6.5257	20.313	6.652	6.9964	6.398	37.523	5.8292
-20.6	8.1212	8.1599	14.734	6.5257	20.313	6.652	6.9964	6.398	37.523	5.8292
-20.5	8.1212	8.1599	14.734	6.5257	20.313	6.652	6.9964	6.398	37.523	5.8292
-20.4	8.1212	8.1599	14.734	6.5257	20.313	6.652	6.9964	6.398	37.523	5.8292
-20.3	8.1212	8.1599	14.734	6.5257	20.313	6.652	6.9964	6.398	37.523	5.8292
-20.2	8.1212	8.1599	14.734	6.5257	20.313	6.652	6.9964	6.398	37.523	5.8292
-20.1	8.1212	8.1599	14.734	6.5257	20.313	6.652	6.9964	6.398	37.523	5.8292
-20	8.1212	8.1599	14.734	6.5257	20.313	6.652	6.9964	6.398	37.523	5.8292
-19.9	8.1212	8.1599	14.734	6.5257	20.313	6.652	6.9964	6.398	37.523	5.8292
-19.8	8.1212	8.1599	14.734	6.5257	20.313	6.652	6.9964	6.398	37.523	5.8292
-19.7	8.1212	8.1599	14.734	6.5257	20.313	6.652	6.9964	6.398	37.523	5.8292
-19.6	8.1212	8.1599	14.734	6.5257	20.313	6.652	6.9964	6.398	37.523	5.8292
-19.5	8.1212	8.1599	14.734	6.5257	20.313	6.652	6.9964	6.398	37.523	5.8292
-19.4	8.1212	8.1599	14.734	6.5257	20.313	6.652	6.9964	6.398	37.523	5.8292
-19.3	8.1212	8.1599	14.734	6.5257	20.313	6.652	6.9964	6.398	37.523	5.8292
-19.2	8.1212	8.1599	14.734	6.5257	20.313	6.652	6.9964	6.398	37.523	5.8292
-19.1	8.1212	8.1599	14.734	6.5257	20.313	6.652	6.9964	6.398	37.523	5.8292
-19	8.1212	8.1599	14.734	6.5257	20.313	6.652	6.9964	6.398	37.523	5.8292
-18.9	8.1212	8.1599	14.734	6.5257	20.313	6.652	6.9964	6.398	37.523	5.8292
-18.8	8.1212	8.1599	14.734	6.5257	20.313	6.652	6.9964	6.398	37.523	5.8292
-18.7	8.1212	8.1599	14.734	6.5257	20.313	6.652	6.9964	6.398	37.523	5.8292
-18.6	8.1212	8.1599	14.734	6.5257	20.313	6.652	6.9964	6.398	37.523	5.8292
-18.5	8.1212	8.1599	14.734	6.5257	20.313	6.652	6.9964	6.398	37.523	5.8292
-18.4	8.1212	8.1599	14.734	6.5257	20.313	6.652	6.9964	6.398	37.523	5.8292
-18.3	8.1212	8.1599	14.734	6.5257	20.313	6.652	6.9964	6.398	37.523	5.8292
-18.2	8.1212	8.1599	14.734	6.5257	20.313	6.652	6.9964	6.398	37.523	5.8292
-18.1	8.1212	8.1599	14.734	6.5257	20.313	6.652	6.9964	6.398	37.523	5.8292
-18	8.1212	8.1599	14.734	6.5257	20.313	6.652	6.9964	6.398	37.523	5.8292
-17.9	8.1212	8.1599	14.734	6.5257	20.313	6.652	6.9964	6.398	37.523	5.8292
-17.8	8.1212	8.1599	14.734	6.5257	20.313	6.652	6.9964	6.398	37.523	5.8292
-17.7	8.1212	8.1599	14.734	6.5257	20.313	6.652	6.9964	6.398	37.523	5.8292
-17.6	8.1212	8.1599	14.734	6.5257	20.313	6.652	6.9964	6.398	37.523	5.8292
-17.5	8.1212	8.1599	14.734	6.5257	20.313	6.652	6.9964	6.398	37.523	5.8292
-17.4	8.1212	8.1599	14.734	6.5257	20.313	6.652	6.9964	6.398	37.523	5.8292
-17.3	8.1212	8.1599	14.734	6.5257	20.313	6.652	6.9964	6.398	37.523	5.8292
-17.2	8.1212	8.1599	14.734	6.5257	20.313	6.652	6.9964	6.398	37.523	5.8292
-17.1	8.1212	8.1599	14.734	6.5257	20.313	6.652	6.9964	6.398	37.523	5.8292
-17	8.1212	8.1599	14.734	6.5257	20.313	6.652	6.9964	6.398	37.523	5.8292
-16.9	8.1212	8.1599	14.734	6.5257	20.313	6.652	6.9964	6.398	37.523	5.8292
-16.8	8.1212	8.1599	14.734	6.5257	20.313	6.652	6.9964	6.398	37.523	5.8292
-16.7	8.1212	8.1599	14.734	6.5257	20.313	6.652	6.9964	6.398	37.523	5.8292
-16.6	8.1212	8.1599	14.734	6.5257	20.313	6.652	6.9964	6.398	37.523	5.8292
-16.5	8.1212	8.1599	14.734	6.5257	20.313	6.652	6.9964	6.398	37.523	5.8292
-16.4	8.1212	8.1599	14.734	6.5257	20.313	6.652	6.9964	6.398	37.523	5.8292
-16.3	8.1212	8.1599	14.734	6.5257	20.313	6.652	6.9964	6.398	37.523	5.8292
-16.2	8.1212	8.1599	14.734	6.5257	20.313	6.652	6.9964	6.398	37.523	5.8292
-16.1	8.1212	8.1599	14.734	6.5257	20.313	6.652	6.9964	6.398	37.523	5.8292
-16	8.1212	8.1599	14.734	6.5257	20.313	6.652	6.9964	6.398	37.523	5.8292
-15.9	8.1212	8.1599	14.734	6.5257	20.313	6.652	6.9964	6.398	37.523	5.8292
-15.8	8.1212	8.1599	14.734	6.5257	20.313	6.652	6.9964	6.398	37.523	5.8292
-15.7	8.1212	8.1599	14.734	6.5257	20.313	6.652	6.9964	6.398	37.523	5.8292
-15.6	8.1212	8.1599	14.734	6.5257	20.313	6.652	6.9964	6.398	37.523	5.8292
-15.5	8.1212	8.1599	14.734	6.5257	20.313	6.652	6.9964	6.398	37.523	5.8292
-15.4	8.1212	8.1599	14.734	6.5257	20.313	6.652	6.9964	6.398	37.523	5.8292
-15.3	8.1212	8.1599	14.734	6.5257	20.313	6.652	6.9964	6.398	37.523	5.8292
-15.2	8.1212	8.1599	14.734	6.5257	20.313	6.652	6.9964	6.398	37.523	5.8292
-15.1	8.1212	8.1599	14.734	6.5257	20.313	6.652	6.9964	6.398	37.523	5.8292
-15	8.1212	8.1599	14.734	6.5257	20.313	6.652	6.9964	6.398	37.523	5.8292
-14.9	8.1212	8.1599	14.734	6.5257	20.313	6.652	6.9964	6.398	37.523	5.8292
-14.8	8.1212	8.1599	14.734	6.5257	20.313	6.652	6.9964	6.398	37.523	5.8292
-14.7	8.1212	8.1599	14.734	6.5257	20.313	6.652	6.9964	6.398	37.523	5.8292
-14.6	8.1212	8.1599	14.734	6.5257	20.313	6.652	6.9964	6.398	37.523	5.8292
-14.5	8.1212	8.1599	14.734	6.5257	20.313	6.652	6.9964	6.398	37.523	5.8292
-14.4	8.1212	8.1599	14.734	6.5257	20.313	6.652	6.9964	6.398	37.523	5.8292
-14.3	8.1212	8.1599	14.734	6.5257	20.313	6.652	6.9964	6.398	37.523	5.8292
-14.2	8.1212	8.1599	14.734	6.5257	20.313	6.652	6.9964	6.398	37.523	5.8292
-14.1	8.1212	8.1599	14.734	6.5257	20.313	6.652	6.9964	6.398	37.523	5.8292
-14	8.1212	8.1599	14.734	6.5257	20.313	6.652	6.9964	6.398	37.523	5.8292
-13.9	8.1212	8.1599	14.734	6.5257	20.313	6.652	6.9964	6.398	37.523	5.8292
-13.8	8.1212	8.1599	14.734	6.5257	20.313	6.652	6.9964	6.398	37.523	5.8292
-13.7	8.1212	8.1599	14.734	6.5257	20.313	6.652	6.9964	6.398	37.523	5.8292
-13.6	8.1212	8.1599	14.734	6.5257	20.313	6.652	6.9964	6.398	37.523	5.8292
-13.5	8.1212	8.1599	14.734	6.5257	20.313	6.652	6.9964	6.398	37.523	5.8292
-13.4	8.1212	8.1599	14.734	6.5257	20.313	6.652	6.9964	6.398	37.523	5.8292
-13.3	8.1212	8.1599	14.734	6.5257	20.313	6.652	6.9964	6.398	37.523	5.8292
-13.2	8.1212	8.1599	14.734	6.5257	20.313	6.652	6.9964	6.398	37.523	5.8292
-13.1	8.1212	8.1599	14.734	6.5257	20.313	6.652	6.9964	6.398	37.523	5.8292
-13	8.1212	8.1599	14.734	6.5257	20.313	6.652	6.9964	6.398	37.523	5.8292
-12.9	8.1212	8.1599	14.734	6.5257	20.313	6.652	6.9964	6.398	37.523	5.8292
-12.8	8.1212	8.1599	14.734	6.5257	20.313	6.652	6.9964	6.398	37.523	5.8292
-12.7	8.1212	8.1599	14.734	6.5257	20.313	6.652	6.9964	6.398	37.523	5.8292
-12.6	8.1212	8.1599	14.734	6.5257	20.313	6.652	6.9964	6.398	37.523	5.8292
-12.5	8.1212	8.1599	14.734	6.5257	20.313	6.652	6.9964	6.398	37.523	5.8292
-12.4	8.1212	8.1599	14.734	6.5257	20.313	6.652	6.9964	6.398	37.523	5.8292
-12.3	8.1212	8.1599	14.734	6.5257	20.313	6.652	6.9964	6.398	37.523	5.8292
-12.2	8.1212	8.1599	14.734	6.5257	20.313	6.652	6.9964	6.398	37.523	5.8292
-12.1	8.1212	8.1599	14.734	6.5257	20.313	6.652	6.9964	6.398	37.523	5.8292
-12	8.1212	8.1599	14.734	6.5257	20.313	6.652	6.9964	6.398	37.523	5.8292
-11.9	8.1212	8.1599	14.734	6.5257	20.313	6.652	6.9964	6.398	37.523	5.8292
-11.8	8.1212	8.1599	14.734	6.5257	20.313	6.652	6.9964	6.398	37.523	5.8292
-11.7	8.1212	8.1599	14.734	6.5257	20.313	6.652	6.9964	6.398	37.523	5.8292
-11.6	8.1212	8.1599	14.734	6.5257	20.313	6.652	6.9964	6.398	37.523	5.8292
-11.5	8.1212	8.1599	14.734	6.5257	20.313	6.652	6.9964	6.398	37.523	5.8292
-11.4	8.1212	8.1599	14.734	6.5257	20.313	6.652	6.9964	6.398	37.523	5.8292
-11.3	8.1212	8.1599	14.734	6.5257	20.313	6.652	6.9964	6.398	37.523	5.8292
-11.2	8.1212	8.1599	14.734	6.5257	20.313	6.652	6.9964	6.398	37.523	5.8292
-11.1	8.1212	8.1599	14.734	6.5257	20.313	6.652	6.9964	6.398	37.523	5.8292
-11	8.1212	8.1599	14.734	6.5257	20.313	6.652	6.9964	6.398	37.523	5.8292
-10.9	8.1212	8.1599	14.734	6.5257	20.313	6.652	6.9964	6.398	37.523	5.8292
-10.8	8.1212	8.1599	14.734	6.5257	20.313	6.652	6.9964	6.398	37.523	5.8292
-10.7	8.1212	8.1599	14.734	6.5257	20.313	6.652	6.9964	6.398	37.523	5.8292
-10.6	8.1212	8.1599	14.734	6.5257	20.313	6.652	6.9964	6.398	37.523	5.8292
-10.5	8.1212	8.1599	14.734	6.5257	20.313	6.652	6.9964	6.398	37.523	5.8292
-10.4	8.1212	8.1599	14.734	6.5257	20.313	6.652	6.9964	6.398	37.523	5.8292
-10.3	8.1212	8.1599	14.734	6.5257	20.313	6.652	6.9964	6.398	37.523	5.8292
-10.2	8.1212	8.1599	14.734	6.5257	20.313	6.652	6.9964	6.398	37.523	5.8292
-10.1	8.1212	8.1599	14.734	6.5257	20.313	6.652	6.9964	6.398	37.523	5.8292
-10	8.1212	8.1599	14.734	6.5257	20.313	6.652	6.9964	6.398	37.523	5.8292
-9.9	8.1212	8.1599	14.734	6.5257	20.313	6.652	6.9964	6.398	37.523	5.8292
-9.8	8.1212	8.1599	14.734	6.5257	20.313	6.652	6.9964	6.398	37.523	5.8292
-9.7	8.1212	8.1599	14.734	6.5257	20.313	6.652	6.9964	6.398	37.523	5.8292
-9.6	8.1212	8.1599	14.734	6.5257	20.313	6.652	6.9964	6.398	37.523	5.8292
-9.5	8.1212	8.1599	14.734	6.5257	20.313	6.652	6.9964	6.398	37.523	5.8292
-9.4	8.1212	8.1599	14.734	6.5257	20.313	6.652	6.9964	75.93	37.523	5.8292
-9.3	8.1212	8.1599	14.734	6.5257	20.313	6.652	6.9964	75.93	37.523	5.8292
-9.2	8.1212	8.1599	14.734	6.5257	20.313	6.652	6.9964	75.93	37.523	5.8292
-9.1	8.1212	8.1599	14.734	6.5257	20.313	6.652	6.9964	75.93	37.523	5.8292
-9	8.1212	8.1599	14.734	6.5257	20.313	6.652	6.9964	75.93	37.523	5.8292
-8.9	8.1212	8.1599	14.734	6.5257	20.313	6.652	6.9964	75.93	37.523	5.8292
-8.8	8.1212	8.1599	14.734	6.5257	20.313	6.652	6.9964	75.93	37.523	5.8292
-8.7	8.1212	8.1599	14.734	6.5257	20.313	6.652	6.9964	75.93	37.523	5.8292
-8.6	8.1212	8.1599	14.734	6.5257	20.313	6.652	6.9964	75.93	37.523	5.8292
-8.5	8.1212	8.1599	14.734	6.5257	20.313	6.652	6.9964	75.93	37.523	5.8292
-8.4	8.1212	8.1599	14.734	6.5257	20.313	6.652	6.9964	75.93	37.523	5.8292
-8.3	8.1212	8.1599	14.734	6.5257	20.313	6.652	6.9964	75.93	37.523	5.8292
-8.2	8.1212	8.1599	14.734	6.5257	20.313	6.652	6.9964	75.93	37.523	5.8292
-8.1	8.1212	8.1599	14.734	6.5257	20.313	6.652	6.9964	75.93	37.523	5.8292
-8	8.1212	8.1599	14.734	6.5257	20.313	6.652	6.9964	75.93	37.523	5.8292
-7.9	8.1212	8.1599	14.734	6.5257	20.313	6.652	6.9964	75.93	37.523	5.8292
-7.8	8.1212	8.1599	14.734	6.5257	20.313	6.652	6.9964	75.93	37.523	5.8292
-7.7	8.1212	8.1599	14.734	6.5257	20.313	6.652	6.9964	75.93	37.523	5.8292
-7.6	8.1212	8.1599	14.734	6.5257	20.313	6.652	6.9964	75.93	37.523	5.8292
-7.5	8.1212	8.1599	14.734	6.5257	20.313	6.652	6.9964	75.93	37.523	5.8292
-7.4	8.1212	8.1599	14.734	6.5257	20.313	6.652	6.9964	75.93	37.523	5.8292
-7.3	8.1212	8.1599	14.734	6.5257	20.313	6.652	6.9964	75.93	37.523	5.8292
-7.2	8.1212	8.1599	14.734	6.5257	20.313	6.652	6.9964	75.93	37.523	5.8292
-7.1	8.1212	8.1599	14.734	6.5257	20.313	6.652	6.9964	75.93	37.523	5.8292
-7	8.1212	8.1599	14.734	6.5257	20.313	6.652	6.9964	75.93	37.523	5.8292
-6.9	8.1212	8.1599	14.734	6.5257	20.313	6.652	6.9964	75.93	37.523	5.8292
-6.8	8.1212	8.1599	14.734	6.5257	20.313	6.652	6.9964	75.93	37.523	5.8292
-6.7	8.1212	8.1599	14.734	6.5257	20.313	6.652	6.9964	75.93	37.523	5.8292
-6.6	8.1212	8.1599	14.734	6.5257	20.313	6.652	6.9964	75.93	37.523	5.8292
-6.5	8.1212	8.1599	14.734	6.5257	20.313	6.652	6.9964	75.93	37.523	5.8292
-6.4	8.1212	8.1599	14.734	6.5257	20.313	6.652	6.9964	75.93	37.523	5.8292
-6.3	8.1212	8.1599	14.734	6.5257	20.313	6.652	6.9964	75.93	37.523	5.8292
-6.2	8.1212	8.1599	14.734	6.5257	20.313	6.652	6.9964	75.93	37.523	5.8292
-6.1	8.1212	8.1599	14.734	6.5257	20.313	6.652	6.9964	75.93	37.523	5.8292
-6	8.1212	8.1599	14.734	6.5257	20.313	6.652	6.9964	75.93	37.523	5.8292
-5.9	8.1212	8.1599	14.734	6.5257	20.313	6.652	6.9964	75.93	37.523	5.8292
-5.8	8.1212	8.1599	14.734	6.5257	20.313	6.652	6.9964	75.93	37.523	5.8292
-5.7	8.1212	8.1599	14.734	6.5257	20.313	6.652	6.9964	75.93	37.523	5.8292
-5.6	8.1212	8.1599	14.734	6.5257	20.313	6.652	6.9964	75.93	37.523	5.8292
-5.5	8.1212	8.1599	14.734	6.5257	20.313	6.652	6.9964	75.93	37.523	5.8292
-5.4	8.1212	8.1599	14.734	6.5257	20.313	6.652	6.9964	75.93	37.523	5.8292
-5.3	8.1212	8.1599	14.734	6.5257	20.313	6.652	6.9964	75.93	37.523	5.8292
-5.2	8.1212	8.1599	14.734	6.5257	20.313	6.652	6.9964	75.93	37.523	5.8292
-5.1	8.1212	8.1599	14.734	6.5257	20.313	6.652	6.9964	75.93	37.523	5.8292
-5	8.1212	8.1599	14.734	6.5257	20.313	6.652	6.9964	75.93	37.523	5.8292
-4.9	8.1212	8.1599	14.734	6.5257	20.313	6.652	6.9964	75.93	37.523	5.8292
-4.8	8.1212	8.1599	14.734	6.5257	20.313	6.652	6.9964	75.93	37.523	5.8292
-4.7	8.1212	8.1599	14.734	6.5257	20.313	6.652	6.9964	75.93	37.523	5.8292
-4.6	8.1212	8.1599	14.734	6.5257	20.313	6.652	6.9964	75.93	37.523	5.8292
-4.5	8.1212	8.1599	14.734	6.5257	20.313	6.652	6.9964	75.93	37.523	5.8292
-4.4	8.1212	8.1599	14.734	6.5257	20.313	6.652	6.9964	75.93	37.523	5.8292
-4.3	8.1212	8.1599	14.734	6.5257	20.313	6.652	6.9964	75.93	37.523	5.8292
-4.2	8.1212	8.1599	14.734	6.5257	20.313	6.652	6.9964	75.93	37.523	5.8292
-4.1	8.1212	8.1599	14.734	6.5257	20.313	6.652	6.9964	75.93	37.523	5.8292
-4	8.1212	8.1599	14.734	6.5257	20.313	6.652	6.9964	75.93	37.523	5.8292
-3.9	8.1212	8.1599	14.734	6.5257	20.313	6.652	6.9964	75.93	37.523	5.8292
-3.8	8.1212	8.1599	14.734	6.5257	20.313	6.652	6.9964	75.93	37.523	5.8292
-3.7	8.1212	8.1599	14.734	6.5257	20.313	6.652	6.9964	75.93	37.523	5.8292
-3.6	8.1212	8.1599	14.734	6.5257	20.313	6.652	6.9964	75.93	37.523	5.8292
-3.5	8.1212	8.1599	14.734	6.5257	20.313	6.652	6.9964	75.93	37.523	5.8292
-3.4	8.1212	8.1599	14.734	6.5257	20.313	6.652	6.9964	75.93	37.523	5.8292
-3.3	8.1212	8.1599	14.734	6.5257	20.313	6.652	6.9964	75.93	37.523	5.8292
-3.2	8.1212	8.1599	14.734	6.5257	20.313	6.652	6.9964	75.93	37.523	5.8292
-3.1	8.1212	8.1599	14.734	6.5257	20.313	6.652	6.9964	75.93	37.523	5.8292
-3	8.1212	8.1599	14.734	6.5257	20.313	6.652	6.9964	75.93	37.523	5.8292
-2.9	8.1212	8.1599	14.734	6.5257	20.313	6.652	6.9964	75.93	37.523	5.8292
-2.8	8.1212	8.1599	14.734	6.5257	20.313	6.652	6.9964	75.93	37.523	5.8292
-2.7	8.1212	8.1599	14.734	6.5257	20.313	6.652	6.9964	75.93	37.523	5.8292
-2.6	8.1212	8.1599	14.734	6.5257	20.313	6.652	6.9964	75.93	37.523	5.8292
-2.5	8.1212	8.1599	14.734	6.5257	20.313	6.652	6.9964	75.93	37.523	5.8292
-2.4	8.1212	8.1599	14.734	6.5257	20.313	6.652	6.9964	75.93	37.523	5.8292
-2.3	8.1212	8.1599	14.734	6.5257	20.313	6.652	6.9964	75.93	37.523	156.74
-2.2	8.1212	8.1599	14.734	6.5257	20.313	6.652	6.9964	75.93	37.523	156.74
-2.1	8.1212	8.1599	14.734	6.5257	20.313	6.652	6.9964	75.93	37.523	156.74
-2	8.1212	8.1599	14.734	6.5257	20.313	6.652	6.9964	75.93	37.523	156.74
-1.9	8.1212	8.1599	14.734	6.5257	20.313	6.652	6.9964	75.93	37.523	156.74
-1.8	8.1212	8.1599	14.734	6.5257	20.313	6.652	6.9964	75.93	37.523	156.74
-1.7	8.1212	8.1599	14.734	6.5257	20.313	6.652	6.9964	75.93	37.523	156.74
-1.6	8.1212	8.1599	14.734	6.5257	20.313	6.652	6.9964	75.93	37.523	156.74
-1.5	8.1212	8.1599	14.734	6.5257	20.313	6.652	6.9964	75.93	37.523	156.74
-1.4	8.1212	8.1599	14.734	6.5257	20.313	6.652	6.9964	75.93	37.523	156.74
-1.3	8.1212	8.1599	14.734	6.5257	20.313	6.652	6.9964	75.93	37.523	156.74
-1.2	8.1212	8.1599	14.734	6.5257	20.313	6.652	6.9964	75.93	37.523	156.74
-1.1	8.1212	8.1599	14.734	6.5257	20.313	6.652	6.9964	75.93	37.523	156.74
-1	8.1212	8.1599	14.734	6.5257	20.313	6.652	6.9964	75.93	37.523	156.74
-0.9	8.1212	8.1599	14.734	6.5257	20.313	6.652	6.9964	75.93	37.523	156.74
-0.8	8.1212	8.1599	14.734	6.5257	20.313	6.652	6.9964	75.93	37.523	156.74
-0.7	8.1212	8.1599	14.734	6.5257	20.313	6.652	6.9964	75.93	37.523	156.74
-0.6	8.1212	8.1599	14.734	6.5257	20.313	6.652	6.9964	75.93	37.523	156.74
-0.5	8.1212	8.1599	14.734	6.5257	20.313	6.652	6.9964	75.93	37.523	156.74
-0.4	8.1212	8.1599	14.734	6.5257	20.313	6.652	6.9964	75.93	37.523	156.74
-0.3	8.1212	8.1599	14.734	6.5257	20.313	6.652	6.9964	75.93	37.523	156.74
[truncated: 7,003 more rows]

## Sheet: Fig. 2B
time (ms)	Spike frequency responses (Hz) of AN2 to current stimulus - experimental data
	Trial 1	Trial 2	Trial 3	Trial 4	Trial 5	Trial 6	Trial 7	Trial 8	Trial 9	Trial 10
-200	0	0	0	0	0	0	0	0	0	0
-199.9	0	0	0	0	0	0	0	0	0	0
-199.8	0	0	0	0	0	0	0	0	0	0
-199.7	0	0	0	0	0	0	0	0	0	0
-199.6	0	0	0	0	0	0	0	0	0	0
-199.5	0	0	0	0	0	0	0	0	0	0
-199.4	0	0	0	0	0	0	0	0	0	0
-199.3	0	0	0	0	0	0	0	0	0	0
-199.2	0	0	0	0	0	0	0	0	0	0
-199.1	0	0	0	0	0	0	0	0	0	0
-199	0	0	0	0	0	6.6489	0	0	0	0
-198.9	0	0	0	0	0	6.6489	0	0	0	0
-198.8	0	0	0	0	0	6.6489	0	0	0	0
-198.7	0	0	0	0	0	6.6489	0	0	0	0
-198.6	0	0	0	0	0	6.6489	0	0	0	0
-198.5	0	0	0	0	0	6.6489	0	0	0	0
-198.4	0	0	0	0	0	6.6489	0	0	0	0
-198.3	0	0	0	0	0	6.6489	0	0	0	0
-198.2	0	0	0	0	0	6.6489	0	0	0	0
-198.1	0	0	0	0	0	6.6489	0	0	0	0
-198	0	0	0	0	0	6.6489	0	0	0	0
-197.9	0	0	0	0	0	6.6489	0	0	0	0
-197.8	0	0	0	0	0	6.6489	0	0	0	0
-197.7	0	0	0	0	0	6.6489	0	0	0	0
-197.6	0	0	0	0	0	6.6489	0	0	0	0
-197.5	0	0	0	0	0	6.6489	0	0	0	0
-197.4	0	0	0	0	0	6.6489	0	0	0	0
-197.3	0	0	0	0	0	6.6489	0	0	0	0
-197.2	0	0	0	0	0	6.6489	0	0	0	0
-197.1	0	0	0	0	0	6.6489	0	0	0	0
-197	0	0	0	0	0	6.6489	0	0	0	0
-196.9	0	0	0	0	0	6.6489	0	0	0	0
-196.8	0	0	0	0	0	6.6489	0	0	0	0
-196.7	0	0	0	0	0	6.6489	0	0	0	0
-196.6	0	0	0	0	0	6.6489	0	0	0	0
-196.5	0	0	0	0	0	6.6489	0	0	0	0
-196.4	0	0	0	0	0	6.6489	0	0	0	0
-196.3	0	0	0	0	0	6.6489	0	0	0	0
-196.2	0	0	0	0	0	6.6489	0	0	0	0
-196.1	0	0	0	0	0	6.6489	0	0	0	0
-196	0	0	0	0	0	6.6489	0	0	0	0
-195.9	0	0	0	0	0	6.6489	0	0	0	0
-195.8	0	0	0	0	0	6.6489	0	0	0	0
-195.7	0	0	0	0	0	6.6489	0	0	0	0
-195.6	0	0	0	0	0	6.6489	0	0	0	0
-195.5	0	0	0	0	0	6.6489	0	0	0	0
-195.4	0	0	0	0	0	6.6489	0	0	0	0
-195.3	0	0	0	0	0	6.6489	0	0	0	0
-195.2	0	0	0	0	0	6.6489	0	0	0	0
-195.1	0	0	0	0	0	6.6489	0	0	0	0
-195	0	0	0	0	0	6.6489	0	0	0	0
-194.9	0	0	0	0	0	6.6489	0	0	0	0
-194.8	0	0	0	0	0	6.6489	0	0	0	0
-194.7	0	0	0	0	0	6.6489	0	0	0	0
-194.6	0	0	0	0	0	6.6489	0	0	0	0
-194.5	0	0	0	0	0	6.6489	0	0	0	0
-194.4	0	0	0	0	0	6.6489	0	0	0	0
-194.3	0	0	0	0	0	6.6489	0	0	0	0
-194.2	0	0	0	0	0	6.6489	0	0	0	0
-194.1	0	0	0	0	0	6.6489	0	0	0	0
-194	0	0	0	0	0	6.6489	0	0	0	0
-193.9	0	0	0	0	0	6.6489	0	0	0	0
-193.8	0	0	0	0	0	6.6489	0	0	0	0
-193.7	0	0	0	0	0	6.6489	0	0	0	0
-193.6	0	0	0	0	0	6.6489	0	0	0	0
-193.5	0	0	0	0	0	6.6489	0	0	0	0
-193.4	0	0	0	0	0	6.6489	0	0	0	0
-193.3	0	0	0	0	0	6.6489	0	0	0	0
-193.2	0	0	0	0	0	6.6489	0	0	0	0
-193.1	0	0	0	0	0	6.6489	0	0	0	0
-193	0	0	0	0	0	6.6489	0	0	0	0
-192.9	0	0	0	0	0	6.6489	0	0	0	0
-192.8	0	0	0	0	0	6.6489	0	0	0	0
-192.7	0	0	0	0	0	6.6489	0	0	0	0
-192.6	0	0	0	0	0	6.6489	0	0	0	0
-192.5	0	0	0	0	0	6.6489	0	0	0	0
-192.4	0	0	0	0	0	6.6489	0	0	0	0
-192.3	0	0	0	0	0	6.6489	0	0	0	0
-192.2	0	0	0	0	0	6.6489	0	0	0	0
-192.1	0	0	0	0	0	6.6489	0	0	0	0
-192	0	0	0	0	0	6.6489	0	0	0	0
-191.9	0	0	0	0	0	6.6489	0	0	0	0
-191.8	0	0	0	0	0	6.6489	0	0	0	0
-191.7	0	0	0	0	0	6.6489	0	0	0	0
-191.6	0	0	0	0	0	6.6489	0	0	0	0
-191.5	0	0	0	0	0	6.6489	0	0	0	0
-191.4	0	0	0	0	0	6.6489	0	0	0	0
-191.3	0	0	0	0	0	6.6489	0	0	0	0
-191.2	0	0	0	0	0	6.6489	0	0	0	0
-191.1	0	0	0	0	0	6.6489	0	0	0	0
-191	0	0	0	0	0	6.6489	0	0	0	0
-190.9	0	0	0	0	0	6.6489	0	0	0	0
-190.8	0	0	0	0	0	6.6489	0	0	0	0
-190.7	0	0	0	0	0	6.6489	0	0	0	0
-190.6	0	0	0	0	0	6.6489	0	0	0	0
-190.5	0	0	0	0	0	6.6489	0	0	0	0
-190.4	0	0	0	0	0	6.6489	0	0	0	0
-190.3	0	0	0	0	0	6.6489	0	0	0	0
-190.2	0	0	0	0	0	6.6489	0	0	0	0
-190.1	0	0	0	0	0	6.6489	0	0	0	0
-190	0	0	0	0	0	6.6489	0	0	0	0
-189.9	0	0	0	0	0	6.6489	0	0	0	0
-189.8	0	0	0	0	0	6.6489	0	0	0	0
-189.7	0	0	0	0	0	6.6489	0	0	0	0
-189.6	0	0	0	0	0	6.6489	0	0	0	0
-189.5	0	0	0	0	0	6.6489	0	0	0	0
-189.4	0	0	0	0	0	6.6489	0	0	0	0
-189.3	0	0	0	0	0	6.6489	0	0	0	0
-189.2	0	0	0	0	0	6.6489	0	0	0	0
-189.1	0	0	0	0	0	6.6489	0	0	0	0
-189	0	0	0	0	0	6.6489	0	0	0	0
-188.9	0	0	0	0	0	6.6489	0	0	0	0
-188.8	0	0	0	0	0	6.6489	0	0	0	0
-188.7	0	0	0	0	0	6.6489	0	0	0	0
-188.6	0	0	0	0	0	6.6489	0	0	0	0
-188.5	0	0	0	0	0	6.6489	0	0	0	0
-188.4	0	0	0	0	0	6.6489	0	0	0	0
-188.3	0	0	0	0	0	6.6489	0	0	0	0
-188.2	0	0	0	0	0	6.6489	0	0	0	0
-188.1	0	0	0	0	0	6.6489	0	0	0	0
-188	0	0	0	0	0	6.6489	0	0	0	0
-187.9	0	0	0	0	0	6.6489	0	0	0	0
-187.8	0	0	0	0	0	6.6489	0	0	0	0
-187.7	0	0	0	0	0	6.6489	0	0	0	0
-187.6	0	0	0	0	0	6.6489	0	0	0	0
-187.5	0	0	0	0	0	6.6489	0	0	0	0
-187.4	0	0	0	0	0	6.6489	0	0	0	0
-187.3	0	0	0	0	0	6.6489	0	0	0	0
-187.2	0	0	0	0	0	6.6489	0	0	0	0
-187.1	0	0	0	0	0	6.6489	0	0	0	0
-187	0	0	0	0	0	6.6489	0	0	0	0
-186.9	0	0	0	0	0	6.6489	0	0	0	0
-186.8	0	0	0	0	0	6.6489	0	0	0	0
-186.7	0	0	0	0	0	6.6489	0	0	0	0
-186.6	0	0	0	0	0	6.6489	0	0	0	0
-186.5	0	0	0	0	0	6.6489	0	0	0	0
-186.4	0	0	0	0	0	6.6489	0	0	0	0
-186.3	0	0	0	0	0	6.6489	0	0	0	0
-186.2	0	0	0	0	0	6.6489	0	0	0	0
-186.1	0	0	0	0	0	6.6489	0	0	0	0
-186	0	0	0	0	4.9542	6.6489	0	0	0	0
-185.9	0	0	0	0	4.9542	6.6489	0	0	0	0
-185.8	0	0	0	0	4.9542	6.6489	0	0	0	0
-185.7	0	0	0	0	4.9542	6.6489	0	0	0	0
-185.6	0	0	0	0	4.9542	6.6489	0	0	0	0
-185.5	0	0	0	0	4.9542	6.6489	0	0	0	0
-185.4	0	0	0	0	4.9542	6.6489	0	0	0	0
-185.3	0	0	0	0	4.9542	6.6489	0	0	0	0
-185.2	0	0	0	0	4.9542	6.6489	0	0	0	0
-185.1	0	0	0	0	4.9542	6.6489	0	0	0	0
-185	0	0	0	0	4.9542	6.6489	0	0	0	0
-184.9	0	0	0	0	4.9542	6.6489	0	0	0	0
-184.8	0	0	0	0	4.9542	6.6489	0	0	0	0
-184.7	0	0	0	0	4.9542	6.6489	0	0	0	0
-184.6	0	0	0	0	4.9542	6.6489	0	0	0	0
-184.5	0	0	0	0	4.9542	6.6489	0	0	0	0
-184.4	0	0	0	0	4.9542	6.6489	0	0	0	0
-184.3	0	0	0	0	4.9542	6.6489	0	0	0	0
-184.2	0	0	0	0	4.9542	6.6489	0	0	0	0
-184.1	0	0	0	0	4.9542	6.6489	0	0	0	0
-184	0	0	0	0	4.9542	6.6489	0	0	0	0
-183.9	0	0	0	0	4.9542	6.6489	0	0	0	0
-183.8	0	0	0	0	4.9542	6.6489	0	0	0	0
-183.7	0	0	0	0	4.9542	6.6489	0	0	0	0
-183.6	0	0	0	0	4.9542	6.6489	0	0	0	0
-183.5	0	0	0	0	4.9542	6.6489	0	0	0	0
-183.4	0	0	0	0	4.9542	6.6489	0	0	0	0
-183.3	0	0	0	0	4.9542	6.6489	0	0	0	0
-183.2	0	0	0	0	4.9542	6.6489	0	0	0	0
-183.1	0	0	0	0	4.9542	6.6489	0	0	0	0
-183	0	0	0	0	4.9542	6.6489	0	0	0	0
-182.9	0	0	0	0	4.9542	6.6489	0	0	0	0
-182.8	0	0	0	0	4.9542	6.6489	0	0	0	0
-182.7	0	0	0	0	4.9542	6.6489	0	0	0	0
-182.6	0	0	0	0	4.9542	6.6489	0	0	0	0
-182.5	0	0	0	0	4.9542	6.6489	0	0	0	0
-182.4	0	0	0	0	4.9542	6.6489	0	0	0	0
-182.3	0	0	0	0	4.9542	6.6489	0	0	0	0
-182.2	0	0	0	0	4.9542	6.6489	0	0	0	0
-182.1	0	0	0	0	4.9542	6.6489	0	0	0	0
-182	0	0	0	0	4.9542	6.6489	0	0	0	0
-181.9	0	0	0	0	4.9542	6.6489	0	0	0	0
-181.8	0	0	0	0	4.9542	6.6489	0	0	0	0
-181.7	0	0	0	0	4.9542	6.6489	0	0	0	0
-181.6	0	0	0	0	4.9542	6.6489	0	0	0	0
-181.5	0	0	0	0	4.9542	6.6489	0	0	0	0
-181.4	0	0	0	0	4.9542	6.6489	0	0	0	0
-181.3	0	0	0	0	4.9542	6.6489	0	0	0	0
-181.2	0	0	0	0	4.9542	6.6489	0	0	0	0
-181.1	0	0	0	0	4.9542	6.6489	0	0	0	0
-181	0	0	0	0	4.9542	6.6489	0	0	0	0
-180.9	0	0	0	0	4.9542	6.6489	0	0	0	0
-180.8	0	0	0	0	4.9542	6.6489	0	0	0	0
-180.7	0	0	0	0	4.9542	6.6489	0	0	0	0
-180.6	0	0	0	0	4.9542	6.6489	0	0	0	0
-180.5	0	0	0	0	4.9542	6.6489	0	0	0	0
-180.4	0	0	0	0	4.9542	6.6489	0	0	0	0
-180.3	0	0	0	0	4.9542	6.6489	0	0	0	0
-180.2	0	0	0	0	4.9542	6.6489	0	0	0	0
-180.1	0	0	0	0	4.9542	6.6489	0	0	0	0
-180	0	0	0	0	4.9542	6.6489	0	0	0	0
-179.9	0	0	0	0	4.9542	6.6489	0	0	0	0
-179.8	0	0	0	0	4.9542	6.6489	0	0	0	0
-179.7	0	0	0	0	4.9542	6.6489	0	0	0	0
-179.6	0	0	0	0	4.9542	6.6489	0	0	0	0
-179.5	0	0	0	0	4.9542	6.6489	0	0	0	0
-179.4	0	0	0	0	4.9542	6.6489	0	0	0	0
-179.3	0	0	0	0	4.9542	6.6489	0	0	0	0
-179.2	0	0	0	0	4.9542	6.6489	0	0	0	0
-179.1	0	0	0	0	4.9542	6.6489	0	0	0	0
-179	0	0	0	0	4.9542	6.6489	0	0	0	0
-178.9	0	0	0	0	4.9542	6.6489	0	0	0	0
-178.8	0	0	0	0	4.9542	6.6489	0	0	0	0
-178.7	0	0	0	0	4.9542	6.6489	0	0	0	0
-178.6	0	0	0	0	4.9542	6.6489	0	0	0	0
-178.5	0	0	0	0	4.9542	6.6489	0	0	0	0
-178.4	0	0	0	0	4.9542	6.6489	0	0	0	0
-178.3	0	0	0	0	4.9542	6.6489	0	0	0	0
-178.2	0	0	0	0	4.9542	6.6489	0	0	0	0
-178.1	0	0	0	0	4.9542	6.6489	0	0	0	0
-178	0	0	0	0	4.9542	6.6489	0	0	0	0
-177.9	0	0	0	0	4.9542	6.6489	0	0	0	0
-177.8	0	0	0	0	4.9542	6.6489	0	0	0	0
-177.7	0	0	0	0	4.9542	6.6489	0	0	0	0
-177.6	0	0	0	0	4.9542	6.6489	0	0	0	0
-177.5	0	0	0	0	4.9542	6.6489	0	0	0	0
-177.4	0	0	0	0	4.9542	6.6489	0	0	0	0
-177.3	0	0	0	0	4.9542	6.6489	0	0	0	0
-177.2	0	0	0	0	4.9542	6.6489	0	0	0	0
-177.1	0	0	0	0	4.9542	6.6489	0	0	0	0
-177	0	0	0	0	4.9542	6.6489	0	0	0	0
-176.9	0	0	0	0	4.9542	6.6489	0	0	0	0
-176.8	0	0	0	0	4.9542	6.6489	0	0	0	0
-176.7	0	0	0	0	4.9542	6.6489	0	0	0	0
-176.6	0	0	0	0	4.9542	6.6489	0	0	0	0
-176.5	0	0	0	0	4.9542	6.6489	0	0	0	0
-176.4	0	0	0	0	4.9542	6.6489	0	0	0	0
-176.3	0	0	0	0	4.9542	6.6489	0	0	0	0
-176.2	0	0	0	0	4.9542	6.6489	0	0	0	0
-176.1	0	0	0	0	4.9542	6.6489	0	0	0	0
-176	0	0	0	0	4.9542	6.6489	0	0	0	0
-175.9	0	0	0	0	4.9542	6.6489	0	0	0	0
-175.8	0	0	0	0	4.9542	6.6489	0	0	0	0
-175.7	0	0	0	0	4.9542	6.6489	0	0	0	0
-175.6	0	0	0	0	4.9542	6.6489	0	0	0	0
-175.5	0	0	0	0	4.9542	6.6489	0	0	0	0
-175.4	0	0	0	0	4.9542	6.6489	0	0	0	0
-175.3	0	0	0	0	4.9542	6.6489	0	0	0	0
-175.2	0	0	0	0	4.9542	6.6489	0	0	0	0
-175.1	0	0	0	0	4.9542	6.6489	0	0	0	0
-175	0	0	0	0	4.9542	6.6489	0	0	0	0
-174.9	0	0	0	0	4.9542	6.6489	0	0	0	0
-174.8	0	0	0	0	4.9542	6.6489	0	0	0	0
-174.7	0	0	0	0	4.9542	6.6489	0	0	0	0
-174.6	0	0	0	0	4.9542	6.6489	0	0	0	0
-174.5	0	0	0	0	4.9542	6.6489	0	0	0	0
-174.4	0	0	0	0	4.9542	6.6489	0	0	0	0
-174.3	0	0	0	0	4.9542	6.6489	0	0	0	0
-174.2	0	0	0	0	4.9542	6.6489	0	0	0	0
-174.1	0	0	0	0	4.9542	6.6489	0	0	0	0
-174	0	0	0	0	4.9542	6.6489	0	0	0	0
-173.9	0	0	0	0	4.9542	6.6489	0	0	0	0
-173.8	0	0	0	0	4.9542	6.6489	0	0	0	0
-173.7	0	0	0	0	4.9542	6.6489	0	0	0	0
-173.6	0	0	0	0	4.9542	6.6489	0	0	0	0
-173.5	0	0	0	0	4.9542	6.6489	0	0	0	0
-173.4	0	0	0	0	4.9542	6.6489	0	0	0	0
-173.3	0	0	0	0	4.9542	6.6489	0	0	0	0
-173.2	0	0	0	0	4.9542	6.6489	0	0	0	0
-173.1	0	0	0	0	4.9542	6.6489	0	0	0	0
-173	0	0	0	0	4.9542	6.6489	0	0	0	0
-172.9	0	0	0	0	4.9542	6.6489	0	0	0	0
-172.8	0	0	0	0	4.9542	6.6489	0	0	0	0
-172.7	0	0	0	0	4.9542	6.6489	0	0	0	0
-172.6	0	0	0	0	4.9542	6.6489	0	0	0	0
-172.5	0	0	0	0	4.9542	6.6489	0	0	0	0
-172.4	0	0	0	0	4.9542	6.6489	0	0	0	0
-172.3	0	0	0	0	4.9542	6.6489	0	0	0	0
-172.2	0	0	0	0	4.9542	6.6489	0	0	0	0
-172.1	0	0	0	0	4.9542	6.6489	0	0	0	0
-172	0	0	0	0	4.9542	6.6489	0	0	0	0
-171.9	0	0	0	0	4.9542	6.6489	0	0	0	0
-171.8	0	0	0	0	4.9542	6.6489	0	0	0	0
-171.7	0	0	0	0	4.9542	6.6489	0	0	0	0
-171.6	0	0	0	0	4.9542	6.6489	0	0	0	0
-171.5	0	0	0	0	4.9542	6.6489	0	0	0	0
-171.4	0	0	0	0	4.9542	6.6489	0	0	0	0
-171.3	0	0	0	0	4.9542	6.6489	0	0	0	0
-171.2	0	0	0	0	4.9542	6.6489	0	0	0	0
-171.1	0	0	0	0	4.9542	6.6489	0	0	0	0
-171	0	0	0	0	4.9542	6.6489	0	0	0	0
-170.9	0	0	0	0	4.9542	6.6489	0	0	0	0
-170.8	0	0	0	0	4.9542	6.6489	0	0	0	0
-170.7	0	0	0	0	4.9542	6.6489	0	0	0	0
-170.6	0	0	0	0	4.9542	6.6489	0	0	0	0
-170.5	0	0	0	0	4.9542	6.6489	0	0	0	0
-170.4	0	0	0	0	4.9542	6.6489	0	0	0	0
-170.3	0	0	0	0	4.9542	6.6489	0	0	0	0
-170.2	0	0	0	0	4.9542	6.6489	0	0	0	0
-170.1	0	0	0	0	4.9542	6.6489	0	0	0	0
-170	0	0	0	0	4.9542	6.6489	0	0	0	0
-169.9	0	0	0	0	4.9542	6.6489	0	0	0	0
-169.8	0	0	0	0	4.9542	6.6489	0	0	0	0
-169.7	0	0	0	0	4.9542	6.6489	0	0	0	0
-169.6	0	0	0	0	4.9542	6.6489	0	0	0	0
-169.5	0	0	0	0	4.9542	6.6489	0	0	0	0
-169.4	0	0	0	0	4.9542	6.6489	0	0	0	0
-169.3	0	0	0	0	4.9542	6.6489	0	0	0	0
-169.2	0	0	0	0	4.9542	6.6489	0	0	0	0
-169.1	0	0	0	0	4.9542	6.6489	0	0	0	0
-169	0	0	0	0	4.9542	6.6489	0	0	0	0
-168.9	0	0	0	0	4.9542	6.6489	0	0	0	0
-168.8	0	0	0	0	4.9542	6.6489	0	0	0	0
-168.7	0	0	0	0	4.9542	6.6489	0	0	0	0
-168.6	0	0	0	0	4.9542	6.6489	0	0	0	0
-168.5	0	0	0	0	4.9542	6.6489	0	0	0	0
-168.4	0	0	0	0	4.9542	6.6489	0	0	0	0
-168.3	0	0	0	0	4.9542	6.6489	0	0	0	0
-168.2	0	0	0	0	4.9542	6.6489	0	0	0	0
-168.1	0	0	0	0	4.9542	6.6489	0	0	0	0
-168	0	0	0	0	4.9542	6.6489	0	0	0	0
-167.9	0	0	0	0	4.9542	6.6489	0	0	0	0
-167.8	0	0	0	0	4.9542	6.6489	0	0	0	0
-167.7	0	0	0	0	4.9542	6.6489	0	0	0	0
-167.6	0	0	0	0	4.9542	6.6489	0	0	0	0
-167.5	0	0	0	0	4.9542	6.6489	0	0	0	0
-167.4	0	0	0	0	4.9542	6.6489	0	0	0	0
-167.3	0	0	0	0	4.9542	6.6489	0	0	0	0
-167.2	0	0	0	0	4.9542	6.6489	0	0	0	0
-167.1	0	0	0	0	4.9542	6.6489	0	0	0	0
-167	0	0	0	0	4.9542	6.6489	0	0	0	0
-166.9	0	0	0	0	4.9542	6.6489	0	0	0	0
-166.8	0	0	0	0	4.9542	6.6489	0	0	0	0
-166.7	0	0	0	0	4.9542	6.6489	0	0	0	0
-166.6	0	0	0	0	4.9542	6.6489	0	0	0	0
-166.5	0	0	0	0	4.9542	6.6489	0	0	0	0
-166.4	0	0	0	0	4.9542	6.6489	0	0	0	0
-166.3	0	0	0	0	4.9542	6.6489	0	0	0	0
-166.2	0	0	0	0	4.9542	6.6489	0	0	0	0
-166.1	0	0	0	0	4.9542	6.6489	0	0	0	0
-166	0	0	0	0	4.9542	6.6489	0	0	0	0
-165.9	0	0	0	0	4.9542	6.6489	0	0	0	0
-165.8	0	0	0	0	4.9542	6.6489	0	0	0	0
-165.7	0	0	0	0	4.9542	6.6489	0	0	0	0
-165.6	0	0	0	0	4.9542	6.6489	0	0	0	0
-165.5	0	0	0	0	4.9542	6.6489	0	0	0	0
-165.4	0	0	0	0	4.9542	6.6489	0	0	0	0
-165.3	0	0	0	0	4.9542	6.6489	0	0	0	0
-165.2	0	0	0	0	4.9542	6.6489	0	0	0	0
-165.1	0	0	0	0	4.9542	6.6489	0	0	0	0
-165	0	0	0	0	4.9542	6.6489	0	0	0	0
-164.9	0	0	0	0	4.9542	6.6489	0	0	0	0
-164.8	0	0	0	0	4.9542	6.6489	0	0	0	0
-164.7	0	0	0	0	4.9542	6.6489	0	0	0	0
-164.6	0	0	0	0	4.9542	6.6489	0	0	0	0
-164.5	0	0	0	0	4.9542	6.6489	0	0	0	0
-164.4	0	0	0	0	4.9542	6.6489	0	0	0	0
-164.3	0	0	0	0	4.9542	6.6489	0	0	0	0
-164.2	0	0	0	0	4.9542	6.6489	0	0	0	0
-164.1	0	0	0	0	4.9542	6.6489	0	0	0	0
-164	0	0	0	0	4.9542	6.6489	0	0	0	0
-163.9	0	0	0	0	4.9542	6.6489	0	0	0	0
-163.8	0	0	0	0	4.9542	6.6489	0	0	0	0
-163.7	0	0	0	0	4.9542	6.6489	0	0	0	0
-163.6	0	0	0	0	4.9542	6.6489	0	0	0	0
-163.5	0	0	0	0	4.9542	6.6489	0	0	0	0
-163.4	0	0	0	0	4.9542	6.6489	0	0	0	0
-163.3	0	0	0	0	4.9542	6.6489	0	0	0	0
-163.2	0	0	0	0	4.9542	6.6489	0	0	0	0
-163.1	0	0	0	0	4.9542	6.6489	0	0	0	0
-163	0	0	0	0	4.9542	6.6489	0	0	0	0
-162.9	0	0	0	0	4.9542	6.6489	0	0	0	0
-162.8	0	0	0	0	4.9542	6.6489	0	0	0	0
-162.7	0	0	0	0	4.9542	6.6489	0	0	0	0
-162.6	0	0	0	0	4.9542	6.6489	0	0	0	0
-162.5	0	0	0	0	4.9542	6.6489	0	0	0	0
-162.4	0	0	0	0	4.9542	6.6489	0	0	0	0
-162.3	0	0	0	0	4.9542	6.6489	0	0	0	0
-162.2	0	0	0	0	4.9542	6.6489	0	0	0	0
-162.1	0	0	0	0	4.9542	6.6489	0	0	0	0
-162	0	0	0	0	4.9542	6.6489	0	0	0	0
-161.9	0	0	0	0	4.9542	6.6489	0	0	0	0
-161.8	0	0	0	0	4.9542	6.6489	0	0	0	0
-161.7	0	0	0	0	4.9542	6.6489	0	0	0	0
-161.6	0	0	0	0	4.9542	6.6489	0	0	0	0
-161.5	0	0	0	0	4.9542	6.6489	0	0	0	0
-161.4	0	0	0	0	4.9542	6.6489	0	0	0	0
-161.3	0	0	0	0	4.9542	6.6489	0	0	0	0
-161.2	0	0	0	0	4.9542	6.6489	0	0	0	0
-161.1	0	0	0	0	4.9542	6.6489	0	0	0	0
-161	0	0	0	0	4.9542	6.6489	0	0	0	0
-160.9	0	0	0	0	4.9542	6.6489	0	0	0	0
-160.8	0	0	0	0	4.9542	6.6489	0	0	0	0
-160.7	0	0	0	0	4.9542	6.6489	0	0	0	0
-160.6	0	0	0	0	4.9542	6.6489	0	0	0	0
-160.5	0	0	0	0	4.9542	6.6489	0	0	0	0
-160.4	0	0	0	0	4.9542	6.6489	0	0	0	0
-160.3	0	0	0	0	4.9542	6.6489	0	0	0	0
-160.2	0	0	0	0	4.9542	6.6489	0	0	0	0
-160.1	0	0	0	0	4.9542	6.6489	0	0	0	0
-160	0	0	0	0	4.9542	6.6489	0	0	0	0
-159.9	0	0	0	0	4.9542	6.6489	0	0	0	0
-159.8	0	0	0	0	4.9542	6.6489	0	0	0	0
-159.7	0	0	0	0	4.9542	6.6489	0	0	0	0
-159.6	0	0	0	0	4.9542	6.6489	0	0	0	0
-159.5	0	0	0	0	4.9542	6.6489	0	0	0	0
-159.4	0	0	0	0	4.9542	6.6489	0	0	0	0
-159.3	0	0	0	0	4.9542	6.6489	0	0	0	0
-159.2	0	0	0	0	4.9542	6.6489	0	0	0	0
-159.1	0	0	0	0	4.9542	6.6489	0	0	0	0
-159	0	0	0	0	4.9542	6.6489	0	0	0	0
-158.9	0	0	0	0	4.9542	6.6489	0	0	0	0
-158.8	0	0	0	0	4.9542	6.6489	0	0	0	0
-158.7	0	0	0	0	4.9542	6.6489	0	0	0	0
-158.6	0	0	0	0	4.9542	6.6489	0	0	0	0
-158.5	0	0	0	0	4.9542	6.6489	0	0	0	0
-158.4	0	0	0	0	4.9542	6.6489	0	0	0	0
-158.3	0	0	0	0	4.9542	6.6489	0	0	0	0
-158.2	0	0	0	0	4.9542	6.6489	0	0	0	0
-158.1	0	0	0	0	4.9542	6.6489	0	0	0	0
-158	0	0	0	0	4.9542	6.6489	0	0	0	0
-157.9	0	0	0	0	4.9542	6.6489	0	0	0	0
-157.8	0	0	0	0	4.9542	6.6489	0	0	0	0
-157.7	0	0	0	0	4.9542	6.6489	0	0	0	0
-157.6	0	0	0	0	4.9542	6.6489	0	0	0	0
-157.5	0	0	0	0	4.9542	6.6489	0	0	0	0
-157.4	0	0	0	0	4.9542	6.6489	0	0	0	0
-157.3	0	0	0	0	4.9542	6.6489	0	0	0	0
-157.2	0	0	0	0	4.9542	6.6489	0	0	0	0
-157.1	0	0	0	0	4.9542	6.6489	0	0	0	0
-157	0	0	0	0	4.9542	6.6489	0	0	0	0
-156.9	0	0	0	0	4.9542	6.6489	0	0	0	0
-156.8	0	0	0	0	4.9542	6.6489	0	0	0	0
-156.7	0	0	0	0	4.9542	6.6489	0	0	0	0
-156.6	0	0	0	0	4.9542	6.6489	0	0	0	0
-156.5	0	0	0	0	4.9542	6.6489	0	0	0	0
-156.4	0	0	0	0	4.9542	6.6489	0	0	0	0
-156.3	0	0	0	0	4.9542	6.6489	0	0	0	0
-156.2	0	0	0	0	4.9542	6.6489	0	0	0	0
-156.1	0	0	0	0	4.9542	6.6489	0	0	0	0
-156	0	0	0	0	4.9542	6.6489	0	0	0	0
-155.9	0	0	0	0	4.9542	6.6489	0	0	0	0
-155.8	0	0	0	0	4.9542	6.6489	0	0	0	8.6768
-155.7	0	0	0	0	4.9542	6.6489	0	0	0	8.6768
-155.6	0	0	0	0	4.9542	6.6489	0	0	0	8.6768
-155.5	0	0	0	0	4.9542	6.6489	0	0	0	8.6768
-155.4	0	0	0	0	4.9542	6.6489	0	0	0	8.6768
-155.3	0	0	0	0	4.9542	6.6489	0	0	0	8.6768
-155.2	0	0	0	0	4.9542	6.6489	0	0	0	8.6768
-155.1	0	0	0	0	4.9542	6.6489	0	0	0	8.6768
-155	0	0	0	0	4.9542	6.6489	0	0	0	8.6768
-154.9	0	0	0	0	4.9542	6.6489	0	0	0	8.6768
-154.8	0	0	0	0	4.9542	6.6489	0	0	0	8.6768
-154.7	0	0	0	0	4.9542	6.6489	0	0	0	8.6768
-154.6	0	0	0	0	4.9542	6.6489	0	0	0	8.6768
-154.5	0	0	0	0	4.9542	6.6489	0	0	0	8.6768
-154.4	0	0	0	0	4.9542	6.6489	0	0	0	8.6768
-154.3	0	0	0	0	4.9542	6.6489	0	0	0	8.6768
-154.2	0	0	0	0	4.9542	6.6489	0	0	0	8.6768
-154.1	0	0	0	0	4.9542	6.6489	0	0	0	8.6768
-154	0	0	0	0	4.9542	6.6489	0	0	0	8.6768
-153.9	0	0	0	0	4.9542	6.6489	0	0	0	8.6768
-153.8	0	0	0	0	4.9542	6.6489	0	0	0	8.6768
-153.7	0	0	0	0	4.9542	6.6489	0	0	0	8.6768
-153.6	0	0	0	0	4.9542	6.6489	0	0	0	8.6768
-153.5	0	0	0	0	4.9542	6.6489	0	0	0	8.6768
-153.4	0	0	0	0	4.9542	6.6489	0	0	0	8.6768
-153.3	0	0	0	0	4.9542	6.6489	0	0	0	8.6768
-153.2	0	0	0	0	4.9542	6.6489	0	0	0	8.6768
-153.1	0	0	0	0	4.9542	6.6489	0	0	0	8.6768
-153	0	0	0	0	4.9542	6.6489	0	0	0	8.6768
-152.9	0	0	0	0	4.9542	6.6489	0	0	0	8.6768
-152.8	0	0	0	0	4.9542	6.6489	0	0	0	8.6768
-152.7	0	0	0	0	4.9542	6.6489	0	0	0	8.6768
-152.6	0	0	0	0	4.9542	6.6489	0	0	0	8.6768
-152.5	0	0	0	0	4.9542	6.6489	0	0	0	8.6768
-152.4	0	0	0	0	4.9542	6.6489	0	0	0	8.6768
-152.3	0	0	0	0	4.9542	6.6489	0	0	0	8.6768
-152.2	0	0	0	0	4.9542	6.6489	0	0	0	8.6768
-152.1	0	0	0	0	4.9542	6.6489	0	0	0	8.6768
-152	0	0	0	0	4.9542	6.6489	0	0	0	8.6768
-151.9	0	0	0	0	4.9542	6.6489	0	0	0	8.6768
-151.8	0	0	0	0	4.9542	6.6489	0	0	0	8.6768
-151.7	0	0	0	0	4.9542	6.6489	0	0	0	8.6768
-151.6	0	0	0	0	4.9542	6.6489	0	0	0	8.6768
-151.5	0	0	0	0	4.9542	6.6489	0	0	0	8.6768
-151.4	0	0	0	0	4.9542	6.6489	0	0	0	8.6768
-151.3	0	0	0	0	4.9542	6.6489	0	0	0	8.6768
-151.2	0	0	0	0	4.9542	6.6489	0	0	0	8.6768
-151.1	0	0	0	0	4.9542	6.6489	0	0	0	8.6768
-151	0	0	0	0	4.9542	6.6489	0	0	0	8.6768
-150.9	0	0	0	0	4.9542	6.6489	0	0	0	8.6768
-150.8	0	0	0	0	4.9542	6.6489	0	0	0	8.6768
-150.7	0	0	0	0	4.9542	6.6489	0	0	0	8.6768
-150.6	0	0	0	0	4.9542	6.6489	0	0	0	8.6768
-150.5	0	0	0	0	4.9542	6.6489	0	0	0	8.6768
-150.4	0	0	0	0	4.9542	6.6489	0	0	0	8.6768
-150.3	0	0	0	0	4.9542	6.6489	0	0	0	8.6768
-150.2	0	0	0	0	4.9542	6.6489	0	0	0	8.6768
-150.1	0	0	0	0	4.9542	6.6489	0	0	0	8.6768
-150	0	0	0	0	4.9542	6.6489	0	0	0	8.6768
-149.9	0	0	0	0	4.9542	6.6489	0	0	0	8.6768
-149.8	0	0	0	0	4.9542	6.6489	0	0	0	8.6768
-149.7	0	0	0	0	4.9542	6.6489	0	0	0	8.6768
-149.6	0	0	0	0	4.9542	6.6489	0	0	0	8.6768
-149.5	0	0	0	0	4.9542	6.6489	0	0	0	8.6768
-149.4	0	0	0	0	4.9542	6.6489	0	0	0	8.6768
-149.3	0	0	0	0	4.9542	6.6489	0	0	0	8.6768
-149.2	0	0	0	0	4.9542	6.6489	0	0	0	8.6768
-149.1	0	0	0	0	4.9542	6.6489	0	0	0	8.6768
-149	0	0	0	0	4.9542	6.6489	0	0	0	8.6768
-148.9	0	0	0	0	4.9542	6.6489	0	0	0	8.6768
-148.8	0	0	0	0	4.9542	6.6489	0	0	0	8.6768
-148.7	0	0	0	0	4.9542	6.6489	0	0	0	8.6768
-148.6	0	0	0	0	4.9542	6.6489	0	0	0	8.6768
-148.5	0	0	0	0	4.9542	6.6489	0	0	0	8.6768
-148.4	0	0	0	0	4.9542	6.6489	0	0	0	8.6768
-148.3	0	0	0	0	4.9542	6.6489	0	0	0	8.6768
-148.2	0	0	0	0	4.9542	6.6489	0	0	0	8.6768
-148.1	0	0	0	0	4.9542	6.6489	0	0	0	8.6768
-148	0	0	0	0	4.9542	6.6489	0	0	0	8.6768
-147.9	0	0	0	0	4.9542	6.6489	0	0	0	8.6768
-147.8	0	0	0	0	4.9542	6.6489	0	0	0	8.6768
-147.7	0	0	0	0	4.9542	6.6489	0	0	0	8.6768
-147.6	0	0	0	0	4.9542	6.6489	0	0	0	8.6768
-147.5	0	0	0	0	4.9542	6.6489	0	0	0	8.6768
-147.4	0	0	0	0	4.9542	6.6489	0	0	0	8.6768
-147.3	0	0	0	0	4.9542	6.6489	0	0	0	8.6768
-147.2	0	0	0	0	4.9542	6.6489	0	0	0	8.6768
-147.1	0	0	0	0	4.9542	6.6489	0	0	0	8.6768
-147	0	0	0	0	4.9542	6.6489	0	0	0	8.6768
-146.9	0	0	0	0	4.9542	6.6489	0	0	0	8.6768
-146.8	0	0	0	0	4.9542	6.6489	0	0	0	8.6768
-146.7	0	0	0	0	4.9542	6.6489	0	0	0	8.6768
-146.6	0	0	0	0	4.9542	6.6489	0	0	0	8.6768
-146.5	0	0	0	0	4.9542	6.6489	0	0	0	8.6768
-146.4	0	0	0	0	4.9542	6.6489	0	0	0	8.6768
-146.3	0	0	0	0	4.9542	6.6489	0	0	0	8.6768
-146.2	0	0	0	0	4.9542	6.6489	0	0	0	8.6768
-146.1	0	0	0	0	4.9542	6.6489	0	0	0	8.6768
-146	0	0	0	0	4.9542	6.6489	0	0	0	8.6768
-145.9	0	0	0	0	4.9542	6.6489	0	0	0	8.6768
-145.8	0	0	0	0	4.9542	6.6489	0	0	0	8.6768
-145.7	0	0	0	0	4.9542	6.6489	0	0	0	8.6768
-145.6	0	0	0	0	4.9542	6.6489	0	0	0	8.6768
-145.5	0	0	0	0	4.9542	6.6489	0	0	0	8.6768
-145.4	0	0	0	0	4.9542	6.6489	0	0	0	8.6768
-145.3	0	0	0	0	4.9542	6.6489	0	0	0	8.6768
-145.2	0	0	0	0	4.9542	6.6489	0	0	0	8.6768
-145.1	0	0	0	0	4.9542	6.6489	0	0	0	8.6768
-145	0	0	0	0	4.9542	6.6489	0	0	0	8.6768
-144.9	0	0	0	0	4.9542	6.6489	0	0	0	8.6768
-144.8	0	0	0	0	4.9542	6.6489	0	0	0	8.6768
-144.7	0	0	0	0	4.9542	6.6489	0	0	0	8.6768
-144.6	0	0	0	0	4.9542	6.6489	0	0	0	8.6768
-144.5	0	0	0	0	4.9542	6.6489	0	0	0	8.6768
-144.4	0	0	0	0	4.9542	6.6489	0	0	0	8.6768
-144.3	0	0	0	0	4.9542	6.6489	0	0	0	8.6768
-144.2	0	0	0	0	4.9542	6.6489	0	0	0	8.6768
-144.1	0	0	0	0	4.9542	6.6489	0	0	0	8.6768
-144	0	0	0	0	4.9542	6.6489	0	0	0	8.6768
-143.9	0	0	0	0	4.9542	6.6489	0	0	0	8.6768
-143.8	0	0	0	0	4.9542	6.6489	0	0	0	8.6768
-143.7	0	0	0	0	4.9542	6.6489	0	0	0	8.6768
-143.6	0	0	0	0	4.9542	6.6489	0	0	0	8.6768
-143.5	0	0	0	0	4.9542	6.6489	0	0	0	8.6768
-143.4	0	0	0	0	4.9542	6.6489	0	0	0	8.6768
-143.3	0	0	0	0	4.9542	6.6489	0	0	0	8.6768
-143.2	0	0	0	0	4.9542	6.6489	0	0	0	8.6768
-143.1	0	0	0	0	4.9542	6.6489	0	0	0	8.6768
-143	0	0	0	0	4.9542	6.6489	0	0	0	8.6768
-142.9	0	0	0	0	4.9542	6.6489	0	0	0	8.6768
-142.8	0	0	0	0	4.9542	6.6489	0	0	0	8.6768
-142.7	0	0	0	0	4.9542	6.6489	0	0	0	8.6768
-142.6	0	0	0	0	4.9542	6.6489	0	0	0	8.6768
-142.5	0	0	0	0	4.9542	6.6489	0	0	0	8.6768
-142.4	0	0	0	0	4.9542	6.6489	0	0	0	8.6768
-142.3	0	0	0	0	4.9542	6.6489	0	0	0	8.6768
-142.2	0	0	0	0	4.9542	6.6489	0	0	0	8.6768
-142.1	0	0	0	0	4.9542	6.6489	0	0	0	8.6768
-142	0	0	0	0	4.9542	6.6489	0	0	0	8.6768
-141.9	0	0	0	0	4.9542	6.6489	0	0	0	8.6768
-141.8	0	0	0	0	4.9542	6.6489	0	0	0	8.6768
-141.7	0	0	0	0	4.9542	6.6489	0	0	0	8.6768
-141.6	0	0	0	0	4.9542	6.6489	0	0	0	8.6768
-141.5	0	0	0	0	4.9542	6.6489	0	0	0	8.6768
-141.4	0	0	0	0	4.9542	6.6489	0	0	0	8.6768
-141.3	0	0	0	0	4.9542	6.6489	0	0	0	8.6768
-141.2	0	0	0	0	4.9542	6.6489	0	0	0	8.6768
-141.1	0	0	0	0	4.9542	6.6489	0	0	0	8.6768
-141	0	0	0	0	4.9542	6.6489	0	0	0	8.6768
-140.9	0	0	0	0	4.9542	6.6489	0	0	0	8.6768
-140.8	0	0	0	0	4.9542	6.6489	0	0	0	8.6768
-140.7	0	0	0	0	4.9542	6.6489	0	0	0	8.6768
-140.6	0	0	0	0	4.9542	6.6489	0	0	0	8.6768
-140.5	0	0	0	0	4.9542	6.6489	0	0	0	8.6768
-140.4	0	0	0	0	4.9542	6.6489	0	0	0	8.6768
-140.3	0	0	0	0	4.9542	6.6489	0	0	0	8.6768
-140.2	0	0	0	0	4.9542	6.6489	0	0	0	8.6768
-140.1	0	0	0	0	4.9542	6.6489	0	0	0	8.6768
-140	0	0	0	0	4.9542	6.6489	0	0	0	8.6768
-139.9	0	0	0	0	4.9542	6.6489	0	0	0	8.6768
-139.8	0	0	0	0	4.9542	6.6489	0	0	0	8.6768
-139.7	0	0	0	0	4.9542	6.6489	0	0	0	8.6768
-139.6	0	0	0	0	4.9542	6.6489	0	0	0	8.6768
-139.5	0	0	0	0	4.9542	6.6489	0	0	0	8.6768
-139.4	0	0	0	0	4.9542	6.6489	0	0	0	8.6768
-139.3	0	0	0	0	4.9542	6.6489	0	0	0	8.6768
-139.2	0	0	0	0	4.9542	6.6489	0	0	0	8.6768
-139.1	0	0	0	0	4.9542	6.6489	0	0	0	8.6768
-139	0	0	0	0	4.9542	6.6489	0	0	0	8.6768
-138.9	0	0	0	0	4.9542	6.6489	0	0	0	8.6768
-138.8	0	0	0	0	4.9542	6.6489	0	0	0	8.6768
-138.7	0	0	0	0	4.9542	6.6489	0	0	0	8.6768
-138.6	0	0	0	0	4.9542	6.6489	0	0	0	8.6768
-138.5	0	0	0	0	4.9542	6.6489	0	0	0	8.6768
-138.4	0	0	0	0	4.9542	6.6489	0	0	0	8.6768
-138.3	0	0	0	0	4.9542	6.6489	0	0	0	8.6768
-138.2	0	0	0	0	4.9542	6.6489	0	0	0	8.6768
-138.1	0	0	0	0	4.9542	6.6489	0	0	0	8.6768
-138	0	0	0	0	4.9542	6.6489	0	0	0	8.6768
-137.9	0	0	0	0	4.9542	6.6489	0	0	0	8.6768
-137.8	0	0	0	0	4.9542	6.6489	0	0	0	8.6768
-137.7	0	0	0	0	4.9542	6.6489	0	0	0	8.6768
-137.6	0	0	0	0	4.9542	6.6489	0	0	0	8.6768
-137.5	0	0	0	0	4.9542	6.6489	0	0	0	8.6768
-137.4	0	0	0	0	4.9542	6.6489	0	0	0	8.6768
-137.3	0	0	0	0	4.9542	6.6489	0	0	0	8.6768
-137.2	0	0	0	0	4.9542	6.6489	0	0	0	8.6768
-137.1	0	0	0	0	4.9542	6.6489	0	0	0	8.6768
-137	0	0	0	0	4.9542	6.6489	0	0	0	8.6768
-136.9	0	0	0	0	4.9542	6.6489	0	0	0	8.6768
-136.8	0	0	0	0	4.9542	6.6489	0	0	0	8.6768
-136.7	0	0	0	0	4.9542	6.6489	0	0	0	8.6768
-136.6	0	0	0	0	4.9542	6.6489	0	0	0	8.6768
-136.5	0	0	0	0	4.9542	6.6489	0	0	0	8.6768
-136.4	0	0	0	0	4.9542	6.6489	0	0	0	8.6768
-136.3	0	0	0	0	4.9542	6.6489	0	0	0	8.6768
-136.2	0	0	0	0	4.9542	6.6489	0	0	0	8.6768
-136.1	0	0	0	0	4.9542	6.6489	0	0	0	8.6768
-136	0	0	0	0	4.9542	6.6489	0	0	0	8.6768
-135.9	0	0	0	0	4.9542	6.6489	0	0	0	8.6768
-135.8	0	0	0	0	4.9542	6.6489	0	0	0	8.6768
-135.7	0	0	0	0	4.9542	6.6489	0	0	0	8.6768
-135.6	0	0	0	0	4.9542	6.6489	0	0	0	8.6768
-135.5	0	0	0	0	4.9542	6.6489	0	0	0	8.6768
-135.4	0	0	0	0	4.9542	6.6489	0	0	0	8.6768
-135.3	0	0	0	0	4.9542	6.6489	0	0	0	8.6768
-135.2	0	0	0	0	4.9542	6.6489	0	0	0	8.6768
-135.1	0	0	0	0	4.9542	6.6489	0	0	0	8.6768
-135	0	0	0	0	4.9542	6.6489	0	0	0	8.6768
-134.9	0	0	0	0	4.9542	6.6489	0	0	0	8.6768
-134.8	0	0	0	0	4.9542	6.6489	0	0	0	8.6768
-134.7	0	0	0	0	4.9542	6.6489	0	0	0	8.6768
-134.6	0	0	0	0	4.9542	6.6489	0	0	0	8.6768
-134.5	0	0	0	0	4.9542	6.6489	0	0	0	8.6768
-134.4	0	0	0	0	4.9542	6.6489	0	0	0	8.6768
-134.3	0	0	0	0	4.9542	6.6489	0	0	0	8.6768
-134.2	0	0	0	0	4.9542	6.6489	0	0	0	8.6768
-134.1	0	0	0	0	4.9542	6.6489	0	0	0	8.6768
-134	0	0	0	0	4.9542	6.6489	0	0	0	8.6768
-133.9	0	0	0	0	4.9542	6.6489	0	0	0	8.6768
-133.8	0	0	0	0	4.9542	6.6489	0	0	0	8.6768
-133.7	0	0	0	0	4.9542	6.6489	0	0	0	8.6768
-133.6	0	0	0	0	4.9542	6.6489	0	0	0	8.6768
-133.5	0	0	0	0	4.9542	6.6489	0	0	0	8.6768
-133.4	0	0	0	0	4.9542	6.6489	0	0	0	8.6768
-133.3	0	0	0	0	4.9542	6.6489	0	0	0	8.6768
-133.2	0	0	0	0	4.9542	6.6489	0	0	0	8.6768
-133.1	0	0	0	0	4.9542	6.6489	0	0	0	8.6768
-133	0	0	0	0	4.9542	6.6489	0	0	0	8.6768
-132.9	0	0	0	0	4.9542	6.6489	0	0	0	8.6768
-132.8	0	0	0	0	4.9542	6.6489	0	0	0	8.6768
-132.7	0	0	0	0	4.9542	6.6489	0	0	0	8.6768
-132.6	0	0	0	0	4.9542	6.6489	0	0	0	8.6768
-132.5	0	0	0	0	4.9542	6.6489	0	0	0	8.6768
-132.4	0	0	0	0	4.9542	6.6489	0	0	0	8.6768
-132.3	0	0	0	0	4.9542	6.6489	0	0	0	8.6768
-132.2	0	0	0	0	4.9542	6.6489	0	0	0	8.6768
-132.1	0	0	0	0	4.9542	6.6489	0	0	0	8.6768
-132	0	0	0	0	4.9542	6.6489	0	0	0	8.6768
-131.9	0	0	0	0	4.9542	6.6489	0	0	0	8.6768
-131.8	0	0	0	0	4.9542	6.6489	0	0	0	8.6768
-131.7	0	0	0	0	4.9542	6.6489	0	0	0	8.6768
-131.6	0	0	0	0	4.9542	6.6489	0	0	0	8.6768
-131.5	0	0	0	0	4.9542	6.6489	0	0	0	8.6768
-131.4	0	0	0	0	4.9542	6.6489	0	0	0	8.6768
-131.3	0	0	0	0	4.9542	6.6489	0	0	0	8.6768
-131.2	0	0	0	0	4.9542	6.6489	0	0	0	8.6768
-131.1	0	0	0	0	4.9542	6.6489	0	0	0	8.6768
-131	0	0	0	0	4.9542	6.6489	0	0	0	8.6768
-130.9	0	0	0	0	4.9542	6.6489	0	0	0	8.6768
-130.8	0	0	0	0	4.9542	6.6489	0	0	0	8.6768
-130.7	0	0	0	0	4.9542	6.6489	0	0	0	8.6768
-130.6	0	0	0	0	4.9542	6.6489	0	0	0	8.6768
-130.5	0	0	0	0	4.9542	6.6489	0	0	0	8.6768
-130.4	0	0	0	0	4.9542	6.6489	0	0	0	8.6768
-130.3	0	0	0	0	4.9542	6.6489	0	0	0	8.6768
-130.2	0	0	0	0	4.9542	6.6489	0	0	0	8.6768
-130.1	0	0	0	0	4.9542	6.6489	0	0	0	8.6768
-130	0	0	0	0	4.9542	6.6489	0	0	0	8.6768
-129.9	0	0	0	0	4.9542	6.6489	0	0	0	8.6768
-129.8	0	0	0	0	4.9542	6.6489	0	0	0	8.6768
-129.7	0	0	0	0	4.9542	6.6489	0	0	0	8.6768
-129.6	0	0	0	0	4.9542	6.6489	0	0	0	8.6768
-129.5	0	0	0	0	4.9542	6.6489	0	0	0	8.6768
-129.4	0	0	0	0	4.9542	6.6489	0	0	0	8.6768
-129.3	0	0	0	0	4.9542	6.6489	0	0	0	8.6768
-129.2	0	0	0	0	4.9542	6.6489	0	0	0	8.6768
-129.1	0	0	0	0	4.9542	6.6489	0	0	0	8.6768
-129	0	0	0	0	4.9542	6.6489	0	0	0	8.6768
-128.9	0	0	0	0	4.9542	6.6489	0	0	0	8.6768
-128.8	0	0	0	0	4.9542	6.6489	0	0	0	8.6768
-128.7	0	0	0	0	4.9542	6.6489	0	0	0	8.6768
-128.6	0	0	0	0	4.9542	6.6489	0	0	0	8.6768
-128.5	0	0	0	0	4.9542	6.6489	0	0	0	8.6768
-128.4	0	0	0	0	4.9542	6.6489	0	0	0	8.6768
-128.3	0	0	0	0	4.9542	6.6489	0	0	0	8.6768
-128.2	0	0	0	0	4.9542	6.6489	0	0	0	8.6768
-128.1	0	0	0	0	4.9542	6.6489	0	0	0	8.6768
-128	0	0	0	0	4.9542	6.6489	0	0	0	8.6768
-127.9	0	0	0	0	4.9542	6.6489	0	0	0	8.6768
-127.8	0	0	0	0	4.9542	6.6489	0	0	0	8.6768
-127.7	0	0	0	0	4.9542	6.6489	0	0	0	8.6768
-127.6	0	0	0	0	4.9542	6.6489	0	0	0	8.6768
-127.5	0	0	0	0	4.9542	6.6489	0	0	0	8.6768
-127.4	0	0	0	0	4.9542	6.6489	0	0	0	8.6768
-127.3	0	0	0	0	4.9542	6.6489	0	0	0	8.6768
-127.2	0	0	0	0	4.9542	6.6489	0	0	0	8.6768
-127.1	0	0	0	0	4.9542	6.6489	0	0	0	8.6768
-127	0	0	0	0	4.9542	6.6489	0	0	0	8.6768
-126.9	0	0	0	0	4.9542	6.6489	0	0	0	8.6768
-126.8	0	0	0	0	4.9542	6.6489	0	0	0	8.6768
-126.7	0	0	0	0	4.9542	6.6489	0	0	0	8.6768
-126.6	0	0	0	0	4.9542	6.6489	0	0	0	8.6768
-126.5	0	0	0	0	4.9542	6.6489	0	0	0	8.6768
-126.4	0	0	0	0	4.9542	6.6489	0	0	0	8.6768
-126.3	0	0	0	0	4.9542	6.6489	0	0	0	8.6768
-126.2	0	0	0	0	4.9542	6.6489	0	0	0	8.6768
-126.1	0	0	0	0	4.9542	6.6489	0	0	0	8.6768
-126	0	0	0	0	4.9542	6.6489	0	0	0	8.6768
-125.9	0	0	0	0	4.9542	6.6489	0	0	0	8.6768
-125.8	0	0	0	0	4.9542	6.6489	0	0	0	8.6768
-125.7	0	0	0	0	4.9542	6.6489	0	0	0	8.6768
-125.6	0	0	0	0	4.9542	6.6489	0	0	0	8.6768
-125.5	0	0	0	0	4.9542	6.6489	0	0	0	8.6768
-125.4	0	0	0	0	4.9542	6.6489	0	0	0	8.6768
-125.3	0	0	0	0	4.9542	6.6489	0	0	0	8.6768
-125.2	0	0	0	0	4.9542	6.6489	0	0	0	8.6768
-125.1	0	0	0	0	4.9542	6.6489	0	0	0	8.6768
-125	0	0	0	0	4.9542	6.6489	0	0	0	8.6768
-124.9	0	0	0	0	4.9542	6.6489	0	0	0	8.6768
-124.8	0	0	0	0	4.9542	6.6489	0	0	0	8.6768
-124.7	0	0	0	0	4.9542	6.6489	0	0	0	8.6768
-124.6	0	0	0	0	4.9542	6.6489	0	0	0	8.6768
-124.5	0	0	0	0	4.9542	6.6489	0	0	0	8.6768
-124.4	0	0	0	0	4.9542	6.6489	0	0	0	8.6768
-124.3	0	0	0	0	4.9542	6.6489	0	0	0	8.6768
-124.2	0	0	0	0	4.9542	6.6489	0	0	0	8.6768
-124.1	0	0	0	0	4.9542	6.6489	0	0	0	8.6768
-124	0	0	0	0	4.9542	6.6489	0	0	0	8.6768
-123.9	0	0	0	0	4.9542	6.6489	0	0	0	8.6768
-123.8	0	0	0	0	4.9542	6.6489	0	0	0	8.6768
-123.7	0	0	0	0	4.9542	6.6489	0	0	0	8.6768
-123.6	0	0	0	0	4.9542	6.6489	0	0	0	8.6768
-123.5	0	0	0	0	4.9542	6.6489	0	0	0	8.6768
-123.4	7.0847	0	0	0	4.9542	6.6489	0	0	0	8.6768
-123.3	7.0847	0	0	0	4.9542	6.6489	0	0	0	8.6768
-123.2	7.0847	0	0	0	4.9542	6.6489	0	0	0	8.6768
-123.1	7.0847	0	0	0	4.9542	6.6489	0	0	0	8.6768
-123	7.0847	0	0	0	4.9542	6.6489	0	0	0	8.6768
-122.9	7.0847	0	0	0	4.9542	6.6489	0	0	0	8.6768
-122.8	7.0847	0	0	0	4.9542	6.6489	0	0	0	8.6768
-122.7	7.0847	0	0	0	4.9542	6.6489	0	0	0	8.6768
-122.6	7.0847	0	0	0	4.9542	6.6489	0	0	0	8.6768
-122.5	7.0847	0	0	0	4.9542	6.6489	0	0	0	8.6768
-122.4	7.0847	0	0	0	4.9542	6.6489	0	0	0	8.6768
-122.3	7.0847	0	0	0	4.9542	6.6489	0	0	0	8.6768
-122.2	7.0847	0	0	0	4.9542	6.6489	0	0	0	8.6768
-122.1	7.0847	0	0	0	4.9542	6.6489	0	0	0	8.6768
-122	7.0847	0	0	0	4.9542	6.6489	0	0	0	8.6768
-121.9	7.0847	0	0	0	4.9542	6.6489	0	0	0	8.6768
-121.8	7.0847	0	0	0	4.9542	6.6489	0	0	0	8.6768
-121.7	7.0847	0	0	0	4.9542	6.6489	0	0	0	8.6768
-121.6	7.0847	0	0	0	4.9542	6.6489	0	0	0	8.6768
-121.5	7.0847	0	0	0	4.9542	6.6489	0	0	0	8.6768
-121.4	7.0847	0	0	0	4.9542	6.6489	0	0	0	8.6768
-121.3	7.0847	0	0	0	4.9542	6.6489	0	0	0	8.6768
-121.2	7.0847	0	0	0	4.9542	6.6489	0	0	0	8.6768
-121.1	7.0847	0	0	0	4.9542	6.6489	0	0	0	8.6768
-121	7.0847	0	0	0	4.9542	6.6489	0	0	0	8.6768
-120.9	7.0847	0	0	0	4.9542	6.6489	0	0	0	8.6768
-120.8	7.0847	0	0	0	4.9542	6.6489	0	0	0	8.6768
-120.7	7.0847	0	0	0	4.9542	6.6489	0	0	0	8.6768
-120.6	7.0847	0	0	0	4.9542	6.6489	0	0	0	8.6768
-120.5	7.0847	0	0	0	4.9542	6.6489	0	0	0	8.6768
-120.4	7.0847	0	0	0	4.9542	6.6489	0	0	0	8.6768
-120.3	7.0847	0	0	0	4.9542	6.6489	0	0	0	8.6768
-120.2	7.0847	0	0	0	4.9542	6.6489	0	0	0	8.6768
-120.1	7.0847	0	0	0	4.9542	6.6489	0	0	0	8.6768
-120	7.0847	0	0	0	4.9542	6.6489	0	0	0	8.6768
-119.9	7.0847	0	0	0	4.9542	6.6489	0	0	0	8.6768
-119.8	7.0847	0	0	0	4.9542	6.6489	0	0	0	8.6768
-119.7	7.0847	0	0	0	4.9542	6.6489	0	0	0	8.6768
-119.6	7.0847	0	0	0	4.9542	6.6489	0	0	0	8.6768
-119.5	7.0847	0	0	0	4.9542	6.6489	0	0	0	8.6768
-119.4	7.0847	0	0	0	4.9542	6.6489	0	0	0	8.6768
-119.3	7.0847	0	0	0	4.9542	6.6489	0	0	0	8.6768
-119.2	7.0847	0	0	0	4.9542	6.6489	0	0	0	8.6768
-119.1	7.0847	0	0	0	4.9542	6.6489	0	0	0	8.6768
-119	7.0847	0	0	0	4.9542	6.6489	0	0	0	8.6768
-118.9	7.0847	0	0	0	4.9542	6.6489	0	0	0	8.6768
-118.8	7.0847	0	0	0	4.9542	6.6489	0	0	0	8.6768
-118.7	7.0847	0	0	0	4.9542	6.6489	0	0	0	8.6768
-118.6	7.0847	0	0	0	4.9542	6.6489	0	0	0	8.6768
-118.5	7.0847	0	0	0	4.9542	6.6489	0	0	0	8.6768
-118.4	7.0847	0	0	0	4.9542	6.6489	0	0	0	8.6768
-118.3	7.0847	0	0	0	4.9542	6.6489	0	0	0	8.6768
-118.2	7.0847	0	0	0	4.9542	6.6489	0	0	0	8.6768
-118.1	7.0847	0	0	0	4.9542	6.6489	0	0	0	8.6768
-118	7.0847	0	0	0	4.9542	6.6489	0	0	0	8.6768
-117.9	7.0847	0	0	0	4.9542	6.6489	0	0	0	8.6768
-117.8	7.0847	0	0	0	4.9542	6.6489	0	0	0	8.6768
-117.7	7.0847	0	0	0	4.9542	6.6489	0	0	0	8.6768
-117.6	7.0847	0	0	0	4.9542	6.6489	0	0	0	8.6768
-117.5	7.0847	0	0	0	4.9542	6.6489	0	0	0	8.6768
-117.4	7.0847	0	0	0	4.9542	6.6489	0	0	0	8.6768
-117.3	7.0847	0	0	0	4.9542	6.6489	0	0	0	8.6768
-117.2	7.0847	0	0	0	4.9542	6.6489	0	0	0	8.6768
-117.1	7.0847	0	0	0	4.9542	6.6489	0	0	0	8.6768
-117	7.0847	0	0	0	4.9542	6.6489	0	0	0	8.6768
-116.9	7.0847	0	0	0	4.9542	6.6489	0	0	0	8.6768
-116.8	7.0847	0	0	0	4.9542	6.6489	0	0	0	8.6768
-116.7	7.0847	0	0	0	4.9542	6.6489	0	0	0	8.6768
-116.6	7.0847	0	0	0	4.9542	6.6489	0	0	0	8.6768
-116.5	7.0847	0	0	0	4.9542	6.6489	0	0	0	8.6768
-116.4	7.0847	0	0	0	4.9542	6.6489	0	0	0	8.6768
-116.3	7.0847	0	0	0	4.9542	6.6489	0	0	0	8.6768
-116.2	7.0847	0	0	0	4.9542	6.6489	0	0	0	8.6768
-116.1	7.0847	0	0	0	4.9542	6.6489	0	0	0	8.6768
-116	7.0847	0	0	0	4.9542	6.6489	0	0	0	8.6768
-115.9	7.0847	0	0	0	4.9542	6.6489	0	0	0	8.6768
-115.8	7.0847	0	0	0	4.9542	6.6489	0	0	0	8.6768
-115.7	7.0847	0	0	0	4.9542	6.6489	0	0	0	8.6768
-115.6	7.0847	0	0	0	4.9542	6.6489	0	0	0	8.6768
-115.5	7.0847	0	0	0	4.9542	6.6489	0	0	0	8.6768
-115.4	7.0847	0	0	0	4.9542	6.6489	0	0	0	8.6768
-115.3	7.0847	0	0	0	4.9542	6.6489	0	0	0	8.6768
-115.2	7.0847	0	0	0	4.9542	6.6489	0	0	0	8.6768
-115.1	7.0847	0	0	0	4.9542	6.6489	0	0	0	8.6768
-115	7.0847	0	0	0	4.9542	6.6489	0	0	0	8.6768
-114.9	7.0847	0	0	0	4.9542	6.6489	0	0	0	8.6768
-114.8	7.0847	0	0	0	4.9542	6.6489	0	0	0	8.6768
-114.7	7.0847	0	0	0	4.9542	6.6489	0	0	0	8.6768
-114.6	7.0847	0	0	0	4.9542	6.6489	0	0	0	8.6768
-114.5	7.0847	0	0	0	4.9542	6.6489	0	0	0	8.6768
-114.4	7.0847	0	0	0	4.9542	6.6489	0	0	0	8.6768
-114.3	7.0847	0	0	0	4.9542	6.6489	0	0	0	8.6768
-114.2	7.0847	0	0	0	4.9542	6.6489	0	0	0	8.6768
-114.1	7.0847	0	0	0	4.9542	6.6489	0	0	0	8.6768
-114	7.0847	0	0	0	4.9542	6.6489	0	0	0	8.6768
-113.9	7.0847	0	0	0	4.9542	6.6489	0	0	0	8.6768
-113.8	7.0847	0	0	0	4.9542	6.6489	0	0	0	8.6768
-113.7	7.0847	0	0	0	4.9542	6.6489	0	0	0	8.6768
-113.6	7.0847	0	0	0	4.9542	6.6489	0	0	0	8.6768
-113.5	7.0847	0	0	0	4.9542	6.6489	0	0	0	8.6768
-113.4	7.0847	0	0	0	4.9542	6.6489	0	0	0	8.6768
-113.3	7.0847	0	0	0	4.9542	6.6489	0	0	0	8.6768
-113.2	7.0847	0	0	0	4.9542	6.6489	0	0	0	8.6768
-113.1	7.0847	0	0	0	4.9542	6.6489	0	0	0	8.6768
-113	7.0847	0	0	0	4.9542	6.6489	0	0	0	8.6768
-112.9	7.0847	0	0	0	4.9542	6.6489	0	0	0	8.6768
-112.8	7.0847	0	0	0	4.9542	6.6489	0	0	0	8.6768
-112.7	7.0847	0	0	0	4.9542	6.6489	0	0	0	8.6768
-112.6	7.0847	0	0	0	4.9542	6.6489	0	0	0	8.6768
-112.5	7.0847	0	0	0	4.9542	6.6489	0	0	0	8.6768
-112.4	7.0847	0	0	0	4.9542	6.6489	0	0	0	8.6768
-112.3	7.0847	0	0	0	4.9542	6.6489	0	0	0	8.6768
-112.2	7.0847	0	0	0	4.9542	6.6489	0	0	0	8.6768
-112.1	7.0847	0	0	0	4.9542	6.6489	0	0	0	8.6768
-112	7.0847	0	0	0	4.9542	6.6489	0	0	0	8.6768
-111.9	7.0847	0	0	0	4.9542	6.6489	0	0	0	8.6768
-111.8	7.0847	0	0	0	4.9542	6.6489	0	0	0	8.6768
-111.7	7.0847	0	0	0	4.9542	6.6489	0	0	0	8.6768
-111.6	7.0847	0	0	0	4.9542	6.6489	0	0	0	8.6768
-111.5	7.0847	0	0	0	4.9542	6.6489	0	0	0	8.6768
-111.4	7.0847	0	0	0	4.9542	6.6489	0	0	0	8.6768
-111.3	7.0847	0	0	0	4.9542	6.6489	0	0	0	8.6768
-111.2	7.0847	0	0	0	4.9542	6.6489	0	0	0	8.6768
-111.1	7.0847	0	0	0	4.9542	6.6489	0	0	0	8.6768
-111	7.0847	0	0	0	4.9542	6.6489	0	0	0	8.6768
-110.9	7.0847	0	0	0	4.9542	6.6489	0	0	0	8.6768
-110.8	7.0847	0	0	0	4.9542	6.6489	0	0	0	8.6768
-110.7	7.0847	0	0	0	4.9542	6.6489	0	0	0	8.6768
-110.6	7.0847	0	0	0	4.9542	6.6489	0	0	0	8.6768
-110.5	7.0847	0	0	0	4.9542	6.6489	0	0	0	8.6768
-110.4	7.0847	0	0	0	4.9542	6.6489	0	0	0	8.6768
-110.3	7.0847	0	0	0	4.9542	6.6489	0	0	0	8.6768
-110.2	7.0847	0	0	0	4.9542	6.6489	0	0	0	8.6768
-110.1	7.0847	0	0	0	4.9542	6.6489	0	0	0	8.6768
-110	7.0847	0	0	0	4.9542	6.6489	0	0	0	8.6768
-109.9	7.0847	0	0	0	4.9542	6.6489	0	0	0	8.6768
-109.8	7.0847	0	0	0	4.9542	6.6489	0	0	0	8.6768
-109.7	7.0847	0	0	0	4.9542	6.6489	0	0	0	8.6768
-109.6	7.0847	0	0	0	4.9542	6.6489	0	0	0	8.6768
-109.5	7.0847	0	0	0	4.9542	6.6489	0	0	0	8.6768
-109.4	7.0847	0	0	0	4.9542	6.6489	0	0	0	8.6768
-109.3	7.0847	0	0	0	4.9542	6.6489	0	0	0	8.6768
-109.2	7.0847	0	0	0	4.9542	6.6489	0	0	0	8.6768
-109.1	7.0847	0	0	0	4.9542	6.6489	0	0	0	8.6768
-109	7.0847	0	0	0	4.9542	6.6489	0	0	0	8.6768
-108.9	7.0847	0	0	0	4.9542	6.6489	0	0	0	8.6768
-108.8	7.0847	0	0	0	4.9542	6.6489	0	0	0	8.6768
-108.7	7.0847	0	0	0	4.9542	6.6489	0	0	0	8.6768
-108.6	7.0847	0	0	0	4.9542	6.6489	0	0	0	8.6768
-108.5	7.0847	0	0	0	4.9542	6.6489	0	0	0	8.6768
-108.4	7.0847	0	0	0	4.9542	6.6489	0	0	0	8.6768
-108.3	7.0847	0	0	0	4.9542	6.6489	0	0	0	8.6768
-108.2	7.0847	0	0	0	4.9542	6.6489	0	0	0	8.6768
-108.1	7.0847	0	0	0	4.9542	6.6489	0	0	0	8.6768
-108	7.0847	0	0	0	4.9542	6.6489	0	0	0	8.6768
-107.9	7.0847	0	0	0	4.9542	6.6489	0	0	0	8.6768
-107.8	7.0847	0	0	0	4.9542	6.6489	0	0	0	8.6768
-107.7	7.0847	0	0	0	4.9542	6.6489	0	0	0	8.6768
-107.6	7.0847	0	0	0	4.9542	6.6489	0	0	0	8.6768
-107.5	7.0847	0	0	0	4.9542	6.6489	0	0	0	8.6768
-107.4	7.0847	0	0	0	4.9542	6.6489	0	0	0	8.6768
-107.3	7.0847	0	0	0	4.9542	6.6489	0	0	0	8.6768
-107.2	7.0847	0	0	0	4.9542	6.6489	0	0	0	8.6768
-107.1	7.0847	0	0	0	4.9542	6.6489	0	0	0	8.6768
-107	7.0847	0	0	0	4.9542	6.6489	0	0	0	8.6768
-106.9	7.0847	0	0	0	4.9542	6.6489	0	0	0	8.6768
-106.8	7.0847	0	0	0	4.9542	6.6489	0	0	0	8.6768
-106.7	7.0847	0	0	0	4.9542	6.6489	0	0	0	8.6768
-106.6	7.0847	0	0	0	4.9542	6.6489	0	0	0	8.6768
-106.5	7.0847	0	0	0	4.9542	6.6489	0	0	0	8.6768
-106.4	7.0847	0	0	0	4.9542	6.6489	0	0	0	8.6768
-106.3	7.0847	0	0	0	4.9542	6.6489	0	0	0	8.6768
-106.2	7.0847	0	0	0	4.9542	6.6489	0	0	0	8.6768
-106.1	7.0847	0	0	0	4.9542	6.6489	0	0	0	8.6768
-106	7.0847	0	0	0	4.9542	6.6489	0	0	0	8.6768
-105.9	7.0847	0	0	0	4.9542	6.6489	0	0	0	8.6768
-105.8	7.0847	0	0	0	4.9542	6.6489	0	0	0	8.6768
-105.7	7.0847	0	0	0	4.9542	6.6489	0	0	0	8.6768
-105.6	7.0847	0	0	0	4.9542	6.6489	0	0	0	8.6768
-105.5	7.0847	0	0	0	4.9542	6.6489	0	0	0	8.6768
-105.4	7.0847	0	0	0	4.9542	6.6489	0	0	0	8.6768
-105.3	7.0847	0	0	0	4.9542	6.6489	0	0	0	8.6768
-105.2	7.0847	0	0	0	4.9542	6.6489	0	0	0	8.6768
-105.1	7.0847	0	0	0	4.9542	6.6489	0	0	0	8.6768
-105	7.0847	0	0	0	4.9542	6.6489	0	0	0	8.6768
-104.9	7.0847	0	0	0	4.9542	6.6489	0	0	0	8.6768
-104.8	7.0847	0	0	0	4.9542	6.6489	0	0	0	8.6768
-104.7	7.0847	0	0	0	4.9542	6.6489	0	0	0	8.6768
-104.6	7.0847	0	0	0	4.9542	6.6489	0	0	0	8.6768
-104.5	7.0847	0	0	0	4.9542	6.6489	0	0	0	8.6768
-104.4	7.0847	0	0	0	4.9542	6.6489	0	0	0	8.6768
-104.3	7.0847	0	0	0	4.9542	6.6489	0	0	0	8.6768
-104.2	7.0847	0	0	0	4.9542	6.6489	0	0	0	8.6768
-104.1	7.0847	0	0	0	4.9542	6.6489	0	0	0	8.6768
-104	7.0847	0	0	0	4.9542	6.6489	0	0	0	8.6768
-103.9	7.0847	0	0	0	4.9542	6.6489	0	0	0	8.6768
-103.8	7.0847	0	0	0	4.9542	6.6489	0	0	0	8.6768
-103.7	7.0847	0	0	0	4.9542	6.6489	0	0	0	8.6768
-103.6	7.0847	0	0	0	4.9542	6.6489	0	0	0	8.6768
-103.5	7.0847	0	0	0	4.9542	6.6489	0	0	0	8.6768
-103.4	7.0847	0	0	0	4.9542	6.6489	0	0	0	8.6768
-103.3	7.0847	0	0	0	4.9542	6.6489	0	0	0	8.6768
-103.2	7.0847	0	0	0	4.9542	6.6489	0	0	0	8.6768
-103.1	7.0847	0	0	0	4.9542	6.6489	0	0	0	8.6768
-103	7.0847	0	0	0	4.9542	6.6489	0	0	0	8.6768
-102.9	7.0847	0	0	0	4.9542	6.6489	0	0	0	8.6768
-102.8	7.0847	0	0	0	4.9542	6.6489	0	0	0	8.6768
-102.7	7.0847	0	0	0	4.9542	6.6489	0	0	0	8.6768
-102.6	7.0847	0	0	0	4.9542	6.6489	0	0	0	8.6768
-102.5	7.0847	0	0	0	4.9542	6.6489	0	0	0	8.6768
-102.4	7.0847	0	0	0	4.9542	6.6489	0	0	0	8.6768
-102.3	7.0847	0	0	0	4.9542	6.6489	0	0	0	8.6768
-102.2	7.0847	0	0	0	4.9542	6.6489	0	0	0	8.6768
-102.1	7.0847	0	0	0	4.9542	6.6489	0	0	0	8.6768
-102	7.0847	0	0	0	4.9542	6.6489	0	0	0	8.6768
-101.9	7.0847	0	0	0	4.9542	6.6489	0	0	0	8.6768
-101.8	7.0847	0	0	0	4.9542	6.6489	0	0	0	8.6768
-101.7	7.0847	0	0	0	4.9542	6.6489	0	0	0	8.6768
-101.6	7.0847	0	0	0	4.9542	6.6489	0	0	0	8.6768
-101.5	7.0847	0	0	0	4.9542	6.6489	0	0	0	8.6768
-101.4	7.0847	0	0	0	4.9542	6.6489	0	0	0	8.6768
-101.3	7.0847	0	0	0	4.9542	6.6489	0	0	0	8.6768
-101.2	7.0847	0	0	0	4.9542	6.6489	0	0	0	8.6768
-101.1	7.0847	0	0	0	4.9542	6.6489	0	0	0	8.6768
-101	7.0847	0	0	0	4.9542	6.6489	0	0	0	8.6768
-100.9	7.0847	0	0	0	4.9542	6.6489	0	0	0	8.6768
-100.8	7.0847	0	0	0	4.9542	6.6489	0	0	0	8.6768
-100.7	7.0847	0	0	0	4.9542	6.6489	0	0	0	8.6768
-100.6	7.0847	0	0	0	4.9542	6.6489	0	0	0	8.6768
-100.5	7.0847	0	0	0	4.9542	6.6489	0	0	0	8.6768
-100.4	7.0847	0	0	0	4.9542	6.6489	0	0	0	8.6768
-100.3	7.0847	0	0	0	4.9542	6.6489	0	0	0	8.6768
-100.2	7.0847	0	0	0	4.9542	6.6489	0	0	0	8.6768
-100.1	7.0847	0	0	0	4.9542	6.6489	0	0	0	8.6768
-100	7.0847	0	0	0	4.9542	6.6489	0	0	0	8.6768
-99.9	7.0847	8.4926	0	0	4.9542	6.6489	0	0	0	8.6768
-99.8	7.0847	8.4926	0	0	4.9542	6.6489	0	0	0	8.6768
-99.7	7.0847	8.4926	0	0	4.9542	6.6489	0	0	0	8.6768
-99.6	7.0847	8.4926	0	0	4.9542	6.6489	0	0	0	8.6768
-99.5	7.0847	8.4926	0	0	4.9542	6.6489	0	0	0	8.6768
-99.4	7.0847	8.4926	0	0	4.9542	6.6489	0	0	0	8.6768
-99.3	7.0847	8.4926	0	0	4.9542	6.6489	0	0	0	8.6768
-99.2	7.0847	8.4926	0	0	4.9542	6.6489	0	0	0	8.6768
-99.1	7.0847	8.4926	0	0	4.9542	6.6489	0	0	0	8.6768
-99	7.0847	8.4926	0	0	4.9542	6.6489	0	0	0	8.6768
-98.9	7.0847	8.4926	0	0	4.9542	6.6489	0	0	0	8.6768
-98.8	7.0847	8.4926	0	0	4.9542	6.6489	0	0	0	8.6768
-98.7	7.0847	8.4926	0	0	4.9542	6.6489	0	0	0	8.6768
-98.6	7.0847	8.4926	0	0	4.9542	6.6489	0	0	0	8.6768
-98.5	7.0847	8.4926	0	0	4.9542	6.6489	0	0	0	8.6768
-98.4	7.0847	8.4926	0	0	4.9542	6.6489	0	0	0	8.6768
-98.3	7.0847	8.4926	0	0	4.9542	6.6489	0	0	0	8.6768
-98.2	7.0847	8.4926	0	0	4.9542	6.6489	0	0	0	8.6768
-98.1	7.0847	8.4926	0	0	4.9542	6.6489	0	0	0	8.6768
-98	7.0847	8.4926	0	0	4.9542	6.6489	0	0	0	8.6768
-97.9	7.0847	8.4926	0	0	4.9542	6.6489	0	0	0	8.6768
-97.8	7.0847	8.4926	0	0	4.9542	6.6489	0	0	0	8.6768
-97.7	7.0847	8.4926	0	0	4.9542	6.6489	0	0	0	8.6768
-97.6	7.0847	8.4926	0	0	4.9542	6.6489	0	0	0	8.6768
-97.5	7.0847	8.4926	0	0	4.9542	6.6489	0	0	0	8.6768
-97.4	7.0847	8.4926	0	0	4.9542	6.6489	0	0	0	8.6768
-97.3	7.0847	8.4926	0	0	4.9542	6.6489	0	0	0	8.6768
-97.2	7.0847	8.4926	0	0	4.9542	6.6489	0	0	0	8.6768
-97.1	7.0847	8.4926	0	0	4.9542	6.6489	0	0	0	8.6768
-97	7.0847	8.4926	0	0	4.9542	6.6489	0	0	0	8.6768
-96.9	7.0847	8.4926	0	0	4.9542	6.6489	0	0	0	8.6768
-96.8	7.0847	8.4926	0	0	4.9542	6.6489	0	0	0	8.6768
-96.7	7.0847	8.4926	0	0	4.9542	6.6489	0	0	0	8.6768
-96.6	7.0847	8.4926	0	0	4.9542	6.6489	0	0	0	8.6768
-96.5	7.0847	8.4926	0	0	4.9542	6.6489	0	0	0	8.6768
-96.4	7.0847	8.4926	0	0	4.9542	6.6489	0	0	0	8.6768
-96.3	7.0847	8.4926	0	0	4.9542	6.6489	0	0	0	8.6768
-96.2	7.0847	8.4926	0	0	4.9542	6.6489	0	0	0	8.6768
-96.1	7.0847	8.4926	0	0	4.9542	6.6489	0	0	0	8.6768
-96	7.0847	8.4926	0	0	4.9542	6.6489	0	0	0	8.6768
-95.9	7.0847	8.4926	0	0	4.9542	6.6489	0	0	0	8.6768
-95.8	7.0847	8.4926	0	0	4.9542	6.6489	0	0	0	8.6768
-95.7	7.0847	8.4926	0	0	4.9542	6.6489	0	0	0	8.6768
-95.6	7.0847	8.4926	0	0	4.9542	6.6489	0	0	0	8.6768
-95.5	7.0847	8.4926	0	0	4.9542	6.6489	0	0	0	8.6768
-95.4	7.0847	8.4926	0	0	4.9542	6.6489	0	0	0	8.6768
-95.3	7.0847	8.4926	0	0	4.9542	6.6489	0	0	0	8.6768
-95.2	7.0847	8.4926	0	0	4.9542	6.6489	0	0	0	8.6768
-95.1	7.0847	8.4926	0	0	4.9542	6.6489	0	0	0	8.6768
-95	7.0847	8.4926	0	0	4.9542	6.6489	0	0	0	8.6768
-94.9	7.0847	8.4926	0	0	4.9542	6.6489	0	0	0	8.6768
-94.8	7.0847	8.4926	0	0	4.9542	6.6489	0	0	0	8.6768
-94.7	7.0847	8.4926	0	0	4.9542	6.6489	0	9.0621	0	8.6768
-94.6	7.0847	8.4926	0	0	4.9542	6.6489	0	9.0621	0	8.6768
-94.5	7.0847	8.4926	0	0	4.9542	6.6489	0	9.0621	0	8.6768
-94.4	7.0847	8.4926	0	0	4.9542	6.6489	0	9.0621	0	8.6768
-94.3	7.0847	8.4926	0	0	4.9542	6.6489	0	9.0621	0	8.6768
-94.2	7.0847	8.4926	0	0	4.9542	6.6489	0	9.0621	0	8.6768
-94.1	7.0847	8.4926	0	0	4.9542	6.6489	0	9.0621	0	8.6768
-94	7.0847	8.4926	0	0	4.9542	6.6489	0	9.0621	0	8.6768
-93.9	7.0847	8.4926	0	0	4.9542	6.6489	0	9.0621	0	8.6768
-93.8	7.0847	8.4926	0	0	4.9542	6.6489	0	9.0621	0	8.6768
-93.7	7.0847	8.4926	0	0	4.9542	6.6489	0	9.0621	0	8.6768
-93.6	7.0847	8.4926	0	0	4.9542	6.6489	0	9.0621	0	8.6768
-93.5	7.0847	8.4926	0	0	4.9542	6.6489	0	9.0621	0	8.6768
-93.4	7.0847	8.4926	0	0	4.9542	6.6489	0	9.0621	0	8.6768
-93.3	7.0847	8.4926	0	0	4.9542	6.6489	0	9.0621	0	8.6768
-93.2	7.0847	8.4926	0	0	4.9542	6.6489	0	9.0621	0	8.6768
-93.1	7.0847	8.4926	0	0	4.9542	6.6489	0	9.0621	0	8.6768
-93	7.0847	8.4926	0	0	4.9542	6.6489	0	9.0621	0	8.6768
-92.9	7.0847	8.4926	0	0	4.9542	6.6489	0	9.0621	0	8.6768
-92.8	7.0847	8.4926	0	0	4.9542	6.6489	0	9.0621	0	8.6768
-92.7	7.0847	8.4926	0	0	4.9542	6.6489	0	9.0621	0	8.6768
-92.6	7.0847	8.4926	0	0	4.9542	6.6489	0	9.0621	0	8.6768
-92.5	7.0847	8.4926	0	0	4.9542	6.6489	0	9.0621	0	8.6768
-92.4	7.0847	8.4926	0	0	4.9542	6.6489	0	9.0621	0	8.6768
-92.3	7.0847	8.4926	0	0	4.9542	6.6489	0	9.0621	0	8.6768
-92.2	7.0847	8.4926	0	0	4.9542	6.6489	0	9.0621	0	8.6768
-92.1	7.0847	8.4926	0	0	4.9542	6.6489	0	9.0621	0	8.6768
-92	7.0847	8.4926	0	0	4.9542	6.6489	0	9.0621	0	8.6768
-91.9	7.0847	8.4926	0	0	4.9542	6.6489	0	9.0621	0	8.6768
-91.8	7.0847	8.4926	0	0	4.9542	6.6489	0	9.0621	0	8.6768
-91.7	7.0847	8.4926	0	0	4.9542	6.6489	0	9.0621	0	8.6768
-91.6	7.0847	8.4926	0	0	4.9542	6.6489	0	9.0621	0	8.6768
-91.5	7.0847	8.4926	0	0	4.9542	6.6489	0	9.0621	0	8.6768
-91.4	7.0847	8.4926	0	0	4.9542	6.6489	0	9.0621	0	8.6768
-91.3	7.0847	8.4926	0	0	4.9542	6.6489	0	9.0621	0	8.6768
-91.2	7.0847	8.4926	0	0	4.9542	6.6489	0	9.0621	0	8.6768
-91.1	7.0847	8.4926	0	0	4.9542	6.6489	0	9.0621	0	8.6768
-91	7.0847	8.4926	0	0	4.9542	6.6489	0	9.0621	0	8.6768
-90.9	7.0847	8.4926	0	0	4.9542	6.6489	0	9.0621	0	8.6768
-90.8	7.0847	8.4926	0	0	4.9542	6.6489	0	9.0621	0	8.6768
-90.7	7.0847	8.4926	0	0	4.9542	6.6489	0	9.0621	0	8.6768
-90.6	7.0847	8.4926	0	0	4.9542	6.6489	0	9.0621	0	8.6768
-90.5	7.0847	8.4926	0	0	4.9542	6.6489	0	9.0621	0	8.6768
-90.4	7.0847	8.4926	0	0	4.9542	6.6489	0	9.0621	0	8.6768
-90.3	7.0847	8.4926	0	0	4.9542	6.6489	0	9.0621	0	8.6768
-90.2	7.0847	8.4926	0	0	4.9542	6.6489	0	9.0621	0	8.6768
-90.1	7.0847	8.4926	0	0	4.9542	6.6489	0	9.0621	0	8.6768
-90	7.0847	8.4926	0	0	4.9542	6.6489	0	9.0621	0	8.6768
-89.9	7.0847	8.4926	0	0	4.9542	6.6489	0	9.0621	0	8.6768
-89.8	7.0847	8.4926	0	0	4.9542	6.6489	0	9.0621	0	8.6768
-89.7	7.0847	8.4926	0	0	4.9542	6.6489	0	9.0621	0	8.6768
-89.6	7.0847	8.4926	0	0	4.9542	6.6489	0	9.0621	0	8.6768
-89.5	7.0847	8.4926	0	0	4.9542	6.6489	0	9.0621	0	8.6768
-89.4	7.0847	8.4926	0	0	4.9542	6.6489	0	9.0621	0	8.6768
-89.3	7.0847	8.4926	0	0	4.9542	6.6489	0	9.0621	0	8.6768
-89.2	7.0847	8.4926	0	0	4.9542	6.6489	0	9.0621	0	8.6768
-89.1	7.0847	8.4926	0	0	4.9542	6.6489	0	9.0621	0	8.6768
-89	7.0847	8.4926	0	0	4.9542	6.6489	0	9.0621	0	8.6768
-88.9	7.0847	8.4926	0	0	4.9542	6.6489	0	9.0621	0	8.6768
-88.8	7.0847	8.4926	0	0	4.9542	6.6489	0	9.0621	0	8.6768
-88.7	7.0847	8.4926	0	0	4.9542	6.6489	0	9.0621	0	8.6768
-88.6	7.0847	8.4926	0	0	4.9542	6.6489	0	9.0621	0	8.6768
-88.5	7.0847	8.4926	0	0	4.9542	6.6489	0	9.0621	0	8.6768
-88.4	7.0847	8.4926	0	0	4.9542	6.6489	0	9.0621	0	8.6768
-88.3	7.0847	8.4926	0	0	4.9542	6.6489	0	9.0621	0	8.6768
-88.2	7.0847	8.4926	0	0	4.9542	6.6489	0	9.0621	0	8.6768
-88.1	7.0847	8.4926	0	0	4.9542	6.6489	0	9.0621	0	8.6768
-88	7.0847	8.4926	0	0	4.9542	6.6489	0	9.0621	0	8.6768
-87.9	7.0847	8.4926	0	0	4.9542	6.6489	0	9.0621	0	8.6768
-87.8	7.0847	8.4926	0	0	4.9542	6.6489	0	9.0621	0	8.6768
-87.7	7.0847	8.4926	0	0	4.9542	6.6489	0	9.0621	0	8.6768
-87.6	7.0847	8.4926	0	0	4.9542	6.6489	0	9.0621	0	8.6768
-87.5	7.0847	8.4926	0	0	4.9542	6.6489	0	9.0621	0	8.6768
-87.4	7.0847	8.4926	0	0	4.9542	6.6489	0	9.0621	0	8.6768
-87.3	7.0847	8.4926	0	0	4.9542	6.6489	0	9.0621	0	8.6768
-87.2	7.0847	8.4926	0	0	4.9542	6.6489	0	9.0621	0	8.6768
-87.1	7.0847	8.4926	0	0	4.9542	6.6489	0	9.0621	0	8.6768
-87	7.0847	8.4926	0	0	4.9542	6.6489	0	9.0621	0	8.6768
-86.9	7.0847	8.4926	0	0	4.9542	6.6489	0	9.0621	0	8.6768
-86.8	7.0847	8.4926	0	0	4.9542	6.6489	0	9.0621	0	8.6768
-86.7	7.0847	8.4926	0	0	4.9542	6.6489	0	9.0621	0	8.6768
-86.6	7.0847	8.4926	0	0	4.9542	6.6489	0	9.0621	0	8.6768
-86.5	7.0847	8.4926	0	0	4.9542	6.6489	0	9.0621	0	8.6768
-86.4	7.0847	8.4926	0	0	4.9542	6.6489	0	9.0621	0	8.6768
-86.3	7.0847	8.4926	0	0	4.9542	6.6489	0	9.0621	0	8.6768
-86.2	7.0847	8.4926	0	0	4.9542	6.6489	0	9.0621	0	8.6768
-86.1	7.0847	8.4926	0	0	4.9542	6.6489	0	9.0621	0	8.6768
-86	7.0847	8.4926	0	0	4.9542	6.6489	0	9.0621	0	8.6768
-85.9	7.0847	8.4926	0	0	4.9542	6.6489	0	9.0621	0	8.6768
-85.8	7.0847	8.4926	0	0	4.9542	6.6489	0	9.0621	0	8.6768
-85.7	7.0847	8.4926	0	0	4.9542	6.6489	0	9.0621	0	8.6768
-85.6	7.0847	8.4926	0	0	4.9542	6.6489	0	9.0621	0	8.6768
-85.5	7.0847	8.4926	0	0	4.9542	6.6489	0	9.0621	0	8.6768
-85.4	7.0847	8.4926	0	0	4.9542	6.6489	0	9.0621	0	8.6768
-85.3	7.0847	8.4926	0	0	4.9542	6.6489	0	9.0621	0	8.6768
-85.2	7.0847	8.4926	0	0	4.9542	6.6489	0	9.0621	0	8.6768
-85.1	7.0847	8.4926	0	0	4.9542	6.6489	0	9.0621	0	8.6768
-85	7.0847	8.4926	0	0	4.9542	6.6489	0	9.0621	0	8.6768
-84.9	7.0847	8.4926	0	0	4.9542	6.6489	0	9.0621	0	8.6768
-84.8	7.0847	8.4926	0	0	4.9542	6.6489	0	9.0621	0	8.6768
-84.7	7.0847	8.4926	0	0	4.9542	6.6489	0	9.0621	0	8.6768
-84.6	7.0847	8.4926	0	0	4.9542	6.6489	0	9.0621	0	8.6768
-84.5	7.0847	8.4926	0	0	4.9542	6.6489	0	9.0621	0	8.6768
-84.4	7.0847	8.4926	0	0	4.9542	6.6489	0	9.0621	10.571	8.6768
-84.3	7.0847	8.4926	0	0	4.9542	6.6489	0	9.0621	10.571	8.6768
-84.2	7.0847	8.4926	0	0	4.9542	6.6489	0	9.0621	10.571	8.6768
-84.1	7.0847	8.4926	0	0	4.9542	6.6489	0	9.0621	10.571	8.6768
-84	7.0847	8.4926	0	0	4.9542	6.6489	0	9.0621	10.571	8.6768
-83.9	7.0847	8.4926	0	0	4.9542	6.6489	0	9.0621	10.571	8.6768
-83.8	7.0847	8.4926	0	0	4.9542	6.6489	0	9.0621	10.571	8.6768
-83.7	7.0847	8.4926	0	0	4.9542	6.6489	0	9.0621	10.571	8.6768
-83.6	7.0847	8.4926	0	0	4.9542	6.6489	0	9.0621	10.571	8.6768
-83.5	7.0847	8.4926	0	0	4.9542	6.6489	0	9.0621	10.571	8.6768
-83.4	7.0847	8.4926	0	0	4.9542	6.6489	0	9.0621	10.571	8.6768
-83.3	7.0847	8.4926	0	0	4.9542	6.6489	0	9.0621	10.571	8.6768
-83.2	7.0847	8.4926	0	0	4.9542	6.6489	0	9.0621	10.571	8.6768
-83.1	7.0847	8.4926	0	0	4.9542	6.6489	0	9.0621	10.571	8.6768
-83	7.0847	8.4926	0	0	4.9542	6.6489	0	9.0621	10.571	8.6768
-82.9	7.0847	8.4926	0	0	4.9542	6.6489	0	9.0621	10.571	8.6768
-82.8	7.0847	8.4926	0	0	4.9542	6.6489	0	9.0621	10.571	8.6768
-82.7	7.0847	8.4926	0	0	4.9542	6.6489	0	9.0621	10.571	8.6768
-82.6	7.0847	8.4926	0	0	4.9542	6.6489	0	9.0621	10.571	8.6768
-82.5	7.0847	8.4926	0	0	4.9542	6.6489	0	9.0621	10.571	8.6768
-82.4	7.0847	8.4926	0	0	4.9542	6.6489	0	9.0621	10.571	8.6768
-82.3	7.0847	8.4926	0	0	4.9542	6.6489	0	9.0621	10.571	8.6768
-82.2	7.0847	8.4926	0	0	4.9542	6.6489	0	9.0621	10.571	8.6768
-82.1	7.0847	8.4926	0	0	4.9542	6.6489	0	9.0621	10.571	8.6768
-82	7.0847	8.4926	0	10.116	4.9542	6.6489	0	9.0621	10.571	8.6768
-81.9	7.0847	8.4926	0	10.116	4.9542	6.6489	0	9.0621	10.571	8.6768
-81.8	7.0847	8.4926	0	10.116	4.9542	6.6489	0	9.0621	10.571	8.6768
-81.7	7.0847	8.4926	0	10.116	4.9542	6.6489	0	9.0621	10.571	8.6768
-81.6	7.0847	8.4926	0	10.116	4.9542	6.6489	0	9.0621	10.571	8.6768
-81.5	7.0847	8.4926	0	10.116	4.9542	6.6489	0	9.0621	10.571	8.6768
-81.4	7.0847	8.4926	0	10.116	4.9542	6.6489	0	9.0621	10.571	8.6768
-81.3	7.0847	8.4926	0	10.116	4.9542	6.6489	0	9.0621	10.571	8.6768
-81.2	7.0847	8.4926	0	10.116	4.9542	6.6489	0	9.0621	10.571	8.6768
-81.1	7.0847	8.4926	0	10.116	4.9542	6.6489	0	9.0621	10.571	8.6768
-81	7.0847	8.4926	0	10.116	4.9542	6.6489	0	9.0621	10.571	8.6768
-80.9	7.0847	8.4926	0	10.116	4.9542	6.6489	0	9.0621	10.571	8.6768
-80.8	7.0847	8.4926	0	10.116	4.9542	6.6489	0	9.0621	10.571	8.6768
-80.7	7.0847	8.4926	0	10.116	4.9542	6.6489	0	9.0621	10.571	8.6768
-80.6	7.0847	8.4926	0	10.116	4.9542	6.6489	0	9.0621	10.571	8.6768
-80.5	7.0847	8.4926	0	10.116	4.9542	6.6489	0	9.0621	10.571	8.6768
-80.4	7.0847	8.4926	0	10.116	4.9542	6.6489	0	9.0621	10.571	8.6768
-80.3	7.0847	8.4926	0	10.116	4.9542	6.6489	0	9.0621	10.571	8.6768
-80.2	7.0847	8.4926	0	10.116	4.9542	6.6489	0	9.0621	10.571	8.6768
-80.1	7.0847	8.4926	0	10.116	4.9542	6.6489	0	9.0621	10.571	8.6768
-80	7.0847	8.4926	0	10.116	4.9542	6.6489	0	9.0621	10.571	8.6768
-79.9	7.0847	8.4926	0	10.116	4.9542	6.6489	0	9.0621	10.571	8.6768
-79.8	7.0847	8.4926	0	10.116	4.9542	6.6489	0	9.0621	10.571	8.6768
-79.7	7.0847	8.4926	0	10.116	4.9542	6.6489	0	9.0621	10.571	8.6768
-79.6	7.0847	8.4926	0	10.116	4.9542	6.6489	0	9.0621	10.571	8.6768
-79.5	7.0847	8.4926	0	10.116	4.9542	6.6489	0	9.0621	10.571	8.6768
-79.4	7.0847	8.4926	0	10.116	4.9542	6.6489	0	9.0621	10.571	8.6768
-79.3	7.0847	8.4926	0	10.116	4.9542	6.6489	0	9.0621	10.571	8.6768
-79.2	7.0847	8.4926	0	10.116	4.9542	6.6489	0	9.0621	10.571	8.6768
-79.1	7.0847	8.4926	0	10.116	4.9542	6.6489	0	9.0621	10.571	8.6768
-79	7.0847	8.4926	0	10.116	4.9542	6.6489	0	9.0621	10.571	8.6768
-78.9	7.0847	8.4926	0	10.116	4.9542	6.6489	0	9.0621	10.571	8.6768
-78.8	7.0847	8.4926	0	10.116	4.9542	6.6489	0	9.0621	10.571	8.6768
-78.7	7.0847	8.4926	0	10.116	4.9542	6.6489	0	9.0621	10.571	8.6768
-78.6	7.0847	8.4926	0	10.116	4.9542	6.6489	0	9.0621	10.571	8.6768
-78.5	7.0847	8.4926	0	10.116	4.9542	6.6489	0	9.0621	10.571	8.6768
-78.4	7.0847	8.4926	0	10.116	4.9542	6.6489	0	9.0621	10.571	8.6768
-78.3	7.0847	8.4926	0	10.116	4.9542	6.6489	0	9.0621	10.571	8.6768
-78.2	7.0847	8.4926	0	10.116	4.9542	6.6489	0	9.0621	10.571	8.6768
-78.1	7.0847	8.4926	0	10.116	4.9542	6.6489	0	9.0621	10.571	8.6768
-78	7.0847	8.4926	0	10.116	4.9542	6.6489	0	9.0621	10.571	8.6768
-77.9	7.0847	8.4926	0	10.116	4.9542	6.6489	0	9.0621	10.571	8.6768
-77.8	7.0847	8.4926	0	10.116	4.9542	6.6489	0	9.0621	10.571	8.6768
-77.7	7.0847	8.4926	0	10.116	4.9542	6.6489	0	9.0621	10.571	8.6768
-77.6	7.0847	8.4926	0	10.116	4.9542	6.6489	0	9.0621	10.571	8.6768
-77.5	7.0847	8.4926	0	10.116	4.9542	6.6489	0	9.0621	10.571	8.6768
-77.4	7.0847	8.4926	0	10.116	4.9542	6.6489	0	9.0621	10.571	8.6768
-77.3	7.0847	8.4926	0	10.116	4.9542	6.6489	0	9.0621	10.571	8.6768
-77.2	7.0847	8.4926	0	10.116	4.9542	6.6489	0	9.0621	10.571	8.6768
-77.1	7.0847	8.4926	0	10.116	4.9542	6.6489	0	9.0621	10.571	8.6768
-77	7.0847	8.4926	0	10.116	4.9542	6.6489	0	9.0621	10.571	8.6768
-76.9	7.0847	8.4926	0	10.116	4.9542	6.6489	0	9.0621	10.571	8.6768
-76.8	7.0847	8.4926	0	10.116	4.9542	6.6489	0	9.0621	10.571	8.6768
-76.7	7.0847	8.4926	0	10.116	4.9542	6.6489	0	9.0621	10.571	8.6768
-76.6	7.0847	8.4926	0	10.116	4.9542	6.6489	0	9.0621	10.571	8.6768
-76.5	7.0847	8.4926	0	10.116	4.9542	6.6489	0	9.0621	10.571	8.6768
-76.4	7.0847	8.4926	0	10.116	4.9542	6.6489	0	9.0621	10.571	8.6768
-76.3	7.0847	8.4926	0	10.116	4.9542	6.6489	0	9.0621	10.571	8.6768
-76.2	7.0847	8.4926	0	10.116	4.9542	6.6489	0	9.0621	10.571	8.6768
-76.1	7.0847	8.4926	0	10.116	4.9542	6.6489	0	9.0621	10.571	8.6768
-76	7.0847	8.4926	0	10.116	4.9542	6.6489	0	9.0621	10.571	8.6768
-75.9	7.0847	8.4926	0	10.116	4.9542	6.6489	0	9.0621	10.571	8.6768
-75.8	7.0847	8.4926	0	10.116	4.9542	6.6489	0	9.0621	10.571	8.6768
-75.7	7.0847	8.4926	0	10.116	4.9542	6.6489	0	9.0621	10.571	8.6768
-75.6	7.0847	8.4926	0	10.116	4.9542	6.6489	0	9.0621	10.571	8.6768
-75.5	7.0847	8.4926	0	10.116	4.9542	6.6489	0	9.0621	10.571	8.6768
-75.4	7.0847	8.4926	0	10.116	4.9542	6.6489	0	9.0621	10.571	8.6768
-75.3	7.0847	8.4926	0	10.116	4.9542	6.6489	0	9.0621	10.571	8.6768
-75.2	7.0847	8.4926	0	10.116	4.9542	6.6489	0	9.0621	10.571	8.6768
-75.1	7.0847	8.4926	0	10.116	4.9542	6.6489	0	9.0621	10.571	8.6768
-75	7.0847	8.4926	0	10.116	4.9542	6.6489	0	9.0621	10.571	8.6768
-74.9	7.0847	8.4926	0	10.116	4.9542	6.6489	0	9.0621	10.571	8.6768
-74.8	7.0847	8.4926	0	10.116	4.9542	6.6489	0	9.0621	10.571	8.6768
-74.7	7.0847	8.4926	0	10.116	4.9542	6.6489	0	9.0621	10.571	8.6768
-74.6	7.0847	8.4926	0	10.116	4.9542	6.6489	0	9.0621	10.571	8.6768
-74.5	7.0847	8.4926	0	10.116	4.9542	6.6489	0	9.0621	10.571	8.6768
-74.4	7.0847	8.4926	0	10.116	4.9542	6.6489	0	9.0621	10.571	8.6768
-74.3	7.0847	8.4926	0	10.116	4.9542	6.6489	0	9.0621	10.571	8.6768
-74.2	7.0847	8.4926	0	10.116	4.9542	6.6489	0	9.0621	10.571	8.6768
-74.1	7.0847	8.4926	0	10.116	4.9542	6.6489	0	9.0621	10.571	8.6768
-74	7.0847	8.4926	0	10.116	4.9542	6.6489	0	9.0621	10.571	8.6768
-73.9	7.0847	8.4926	0	10.116	4.9542	6.6489	0	9.0621	10.571	8.6768
-73.8	7.0847	8.4926	0	10.116	4.9542	6.6489	0	9.0621	10.571	8.6768
-73.7	7.0847	8.4926	0	10.116	4.9542	6.6489	0	9.0621	10.571	8.6768
-73.6	7.0847	8.4926	0	10.116	4.9542	6.6489	0	9.0621	10.571	8.6768
-73.5	7.0847	8.4926	0	10.116	4.9542	6.6489	0	9.0621	10.571	8.6768
-73.4	7.0847	8.4926	0	10.116	4.9542	6.6489	0	9.0621	10.571	8.6768
-73.3	7.0847	8.4926	0	10.116	4.9542	6.6489	0	9.0621	10.571	8.6768
-73.2	7.0847	8.4926	0	10.116	4.9542	6.6489	0	9.0621	10.571	8.6768
-73.1	7.0847	8.4926	0	10.116	4.9542	6.6489	0	9.0621	10.571	8.6768
-73	7.0847	8.4926	0	10.116	4.9542	6.6489	0	9.0621	10.571	8.6768
-72.9	7.0847	8.4926	0	10.116	4.9542	6.6489	10.875	9.0621	10.571	8.6768
-72.8	7.0847	8.4926	0	10.116	4.9542	6.6489	10.875	9.0621	10.571	8.6768
-72.7	7.0847	8.4926	0	10.116	4.9542	6.6489	10.875	9.0621	10.571	8.6768
-72.6	7.0847	8.4926	0	10.116	4.9542	6.6489	10.875	9.0621	10.571	8.6768
-72.5	7.0847	8.4926	0	10.116	4.9542	6.6489	10.875	9.0621	10.571	8.6768
-72.4	7.0847	8.4926	0	10.116	4.9542	6.6489	10.875	9.0621	10.571	8.6768
-72.3	7.0847	8.4926	0	10.116	4.9542	6.6489	10.875	9.0621	10.571	8.6768
-72.2	7.0847	8.4926	0	10.116	4.9542	6.6489	10.875	9.0621	10.571	8.6768
-72.1	7.0847	8.4926	0	10.116	4.9542	6.6489	10.875	9.0621	10.571	8.6768
-72	7.0847	8.4926	0	10.116	4.9542	6.6489	10.875	9.0621	10.571	8.6768
-71.9	7.0847	8.4926	0	10.116	4.9542	6.6489	10.875	9.0621	10.571	8.6768
-71.8	7.0847	8.4926	0	10.116	4.9542	6.6489	10.875	9.0621	10.571	8.6768
-71.7	7.0847	8.4926	0	10.116	4.9542	6.6489	10.875	9.0621	10.571	8.6768
-71.6	7.0847	8.4926	0	10.116	4.9542	6.6489	10.875	9.0621	10.571	8.6768
-71.5	7.0847	8.4926	0	10.116	4.9542	6.6489	10.875	9.0621	10.571	8.6768
-71.4	7.0847	8.4926	0	10.116	4.9542	6.6489	10.875	9.0621	10.571	8.6768
-71.3	7.0847	8.4926	0	10.116	4.9542	6.6489	10.875	9.0621	10.571	8.6768
-71.2	7.0847	8.4926	0	10.116	4.9542	6.6489	10.875	9.0621	10.571	8.6768
-71.1	7.0847	8.4926	0	10.116	4.9542	6.6489	10.875	9.0621	10.571	8.6768
-71	7.0847	8.4926	0	10.116	4.9542	6.6489	10.875	9.0621	10.571	8.6768
-70.9	7.0847	8.4926	0	10.116	4.9542	6.6489	10.875	9.0621	10.571	8.6768
-70.8	7.0847	8.4926	0	10.116	4.9542	6.6489	10.875	9.0621	10.571	8.6768
-70.7	7.0847	8.4926	0	10.116	4.9542	6.6489	10.875	9.0621	10.571	8.6768
-70.6	7.0847	8.4926	0	10.116	4.9542	6.6489	10.875	9.0621	10.571	8.6768
-70.5	7.0847	8.4926	0	10.116	4.9542	6.6489	10.875	9.0621	10.571	8.6768
-70.4	7.0847	8.4926	0	10.116	4.9542	6.6489	10.875	9.0621	10.571	8.6768
-70.3	7.0847	8.4926	0	10.116	4.9542	6.6489	10.875	9.0621	10.571	8.6768
-70.2	7.0847	8.4926	0	10.116	4.9542	6.6489	10.875	9.0621	10.571	8.6768
-70.1	7.0847	8.4926	0	10.116	4.9542	6.6489	10.875	9.0621	10.571	8.6768
-70	7.0847	8.4926	0	10.116	4.9542	6.6489	10.875	9.0621	10.571	8.6768
-69.9	7.0847	8.4926	0	10.116	4.9542	6.6489	10.875	9.0621	10.571	8.6768
-69.8	7.0847	8.4926	0	10.116	4.9542	6.6489	10.875	9.0621	10.571	8.6768
-69.7	7.0847	8.4926	0	10.116	4.9542	6.6489	10.875	9.0621	10.571	8.6768
-69.6	7.0847	8.4926	0	10.116	4.9542	6.6489	10.875	9.0621	10.571	8.6768
-69.5	7.0847	8.4926	0	10.116	4.9542	6.6489	10.875	9.0621	10.571	8.6768
-69.4	7.0847	8.4926	0	10.116	4.9542	6.6489	10.875	9.0621	10.571	8.6768
-69.3	7.0847	8.4926	0	10.116	4.9542	6.6489	10.875	9.0621	10.571	8.6768
-69.2	7.0847	8.4926	0	10.116	4.9542	6.6489	10.875	9.0621	10.571	8.6768
-69.1	7.0847	8.4926	0	10.116	4.9542	6.6489	10.875	9.0621	10.571	8.6768
-69	7.0847	8.4926	0	10.116	4.9542	6.6489	10.875	9.0621	10.571	8.6768
-68.9	7.0847	8.4926	0	10.116	4.9542	6.6489	10.875	9.0621	10.571	8.6768
-68.8	7.0847	8.4926	0	10.116	4.9542	6.6489	10.875	9.0621	10.571	8.6768
-68.7	7.0847	8.4926	0	10.116	4.9542	6.6489	10.875	9.0621	10.571	8.6768
-68.6	7.0847	8.4926	0	10.116	4.9542	6.6489	10.875	9.0621	10.571	8.6768
-68.5	7.0847	8.4926	0	10.116	4.9542	6.6489	10.875	9.0621	10.571	8.6768
-68.4	7.0847	8.4926	0	10.116	4.9542	6.6489	10.875	9.0621	10.571	8.6768
-68.3	7.0847	8.4926	0	10.116	4.9542	6.6489	10.875	9.0621	10.571	8.6768
-68.2	7.0847	8.4926	0	10.116	4.9542	6.6489	10.875	9.0621	10.571	8.6768
-68.1	7.0847	8.4926	0	10.116	4.9542	6.6489	10.875	9.0621	10.571	8.6768
-68	7.0847	8.4926	0	10.116	4.9542	6.6489	10.875	9.0621	10.571	8.6768
-67.9	7.0847	8.4926	0	10.116	4.9542	6.6489	10.875	9.0621	10.571	8.6768
-67.8	7.0847	8.4926	0	10.116	4.9542	6.6489	10.875	9.0621	10.571	8.6768
-67.7	7.0847	8.4926	0	10.116	4.9542	6.6489	10.875	9.0621	10.571	8.6768
-67.6	7.0847	8.4926	0	10.116	4.9542	6.6489	10.875	9.0621	10.571	8.6768
-67.5	7.0847	8.4926	0	10.116	4.9542	6.6489	10.875	9.0621	10.571	8.6768
-67.4	7.0847	8.4926	0	10.116	4.9542	6.6489	10.875	9.0621	10.571	8.6768
-67.3	7.0847	8.4926	0	10.116	4.9542	6.6489	10.875	9.0621	10.571	8.6768
-67.2	7.0847	8.4926	0	10.116	4.9542	6.6489	10.875	9.0621	10.571	8.6768
-67.1	7.0847	8.4926	0	10.116	4.9542	6.6489	10.875	9.0621	10.571	8.6768
-67	7.0847	8.4926	0	10.116	4.9542	6.6489	10.875	9.0621	10.571	8.6768
-66.9	7.0847	8.4926	0	10.116	4.9542	6.6489	10.875	9.0621	10.571	8.6768
-66.8	7.0847	8.4926	0	10.116	4.9542	6.6489	10.875	9.0621	10.571	8.6768
-66.7	7.0847	8.4926	0	10.116	4.9542	6.6489	10.875	9.0621	10.571	8.6768
-66.6	7.0847	8.4926	0	10.116	4.9542	6.6489	10.875	9.0621	10.571	8.6768
-66.5	7.0847	8.4926	0	10.116	4.9542	6.6489	10.875	9.0621	10.571	8.6768
-66.4	7.0847	8.4926	0	10.116	4.9542	6.6489	10.875	9.0621	10.571	8.6768
-66.3	7.0847	8.4926	0	10.116	4.9542	6.6489	10.875	9.0621	10.571	8.6768
-66.2	7.0847	8.4926	0	10.116	4.9542	6.6489	10.875	9.0621	10.571	8.6768
-66.1	7.0847	8.4926	0	10.116	4.9542	6.6489	10.875	9.0621	10.571	8.6768
-66	7.0847	8.4926	0	10.116	4.9542	6.6489	10.875	9.0621	10.571	8.6768
-65.9	7.0847	8.4926	0	10.116	4.9542	6.6489	10.875	9.0621	10.571	8.6768
-65.8	7.0847	8.4926	0	10.116	4.9542	6.6489	10.875	9.0621	10.571	8.6768
-65.7	7.0847	8.4926	0	10.116	4.9542	6.6489	10.875	9.0621	10.571	8.6768
-65.6	7.0847	8.4926	0	10.116	4.9542	6.6489	10.875	9.0621	10.571	8.6768
-65.5	7.0847	8.4926	0	10.116	4.9542	6.6489	10.875	9.0621	10.571	8.6768
-65.4	7.0847	8.4926	0	10.116	4.9542	6.6489	10.875	9.0621	10.571	8.6768
-65.3	7.0847	8.4926	0	10.116	4.9542	6.6489	10.875	9.0621	10.571	8.6768
-65.2	7.0847	8.4926	0	10.116	4.9542	6.6489	10.875	9.0621	10.571	8.6768
-65.1	7.0847	8.4926	0	10.116	4.9542	6.6489	10.875	9.0621	10.571	8.6768
-65	7.0847	8.4926	0	10.116	4.9542	6.6489	10.875	9.0621	10.571	8.6768
-64.9	7.0847	8.4926	0	10.116	4.9542	6.6489	10.875	9.0621	10.571	8.6768
-64.8	7.0847	8.4926	0	10.116	4.9542	6.6489	10.875	9.0621	10.571	8.6768
-64.7	7.0847	8.4926	0	10.116	4.9542	6.6489	10.875	9.0621	10.571	8.6768
-64.6	7.0847	8.4926	0	10.116	4.9542	6.6489	10.875	9.0621	10.571	8.6768
-64.5	7.0847	8.4926	0	10.116	4.9542	6.6489	10.875	9.0621	10.571	8.6768
-64.4	7.0847	8.4926	0	10.116	4.9542	6.6489	10.875	9.0621	10.571	8.6768
-64.3	7.0847	8.4926	0	10.116	4.9542	6.6489	10.875	9.0621	10.571	8.6768
-64.2	7.0847	8.4926	0	10.116	4.9542	6.6489	10.875	9.0621	10.571	8.6768
-64.1	7.0847	8.4926	0	10.116	4.9542	6.6489	10.875	9.0621	10.571	8.6768
-64	7.0847	8.4926	0	10.116	4.9542	6.6489	10.875	9.0621	10.571	8.6768
-63.9	7.0847	8.4926	0	10.116	4.9542	6.6489	10.875	9.0621	10.571	8.6768
-63.8	7.0847	8.4926	0	10.116	4.9542	6.6489	10.875	9.0621	10.571	8.6768
-63.7	7.0847	8.4926	0	10.116	4.9542	6.6489	10.875	9.0621	10.571	8.6768
-63.6	7.0847	8.4926	0	10.116	4.9542	6.6489	10.875	9.0621	10.571	8.6768
-63.5	7.0847	8.4926	0	10.116	4.9542	6.6489	10.875	9.0621	10.571	8.6768
-63.4	7.0847	8.4926	0	10.116	4.9542	6.6489	10.875	9.0621	10.571	8.6768
-63.3	7.0847	8.4926	0	10.116	4.9542	6.6489	10.875	9.0621	10.571	8.6768
-63.2	7.0847	8.4926	0	10.116	4.9542	6.6489	10.875	9.0621	10.571	8.6768
-63.1	7.0847	8.4926	0	10.116	4.9542	6.6489	10.875	9.0621	10.571	8.6768
-63	7.0847	8.4926	0	10.116	4.9542	6.6489	10.875	9.0621	10.571	8.6768
-62.9	7.0847	8.4926	0	10.116	4.9542	6.6489	10.875	9.0621	10.571	8.6768
-62.8	7.0847	8.4926	0	10.116	4.9542	6.6489	10.875	9.0621	10.571	8.6768
-62.7	7.0847	8.4926	0	10.116	4.9542	6.6489	10.875	9.0621	10.571	8.6768
-62.6	7.0847	8.4926	0	10.116	4.9542	6.6489	10.875	9.0621	10.571	8.6768
-62.5	7.0847	8.4926	0	10.116	4.9542	6.6489	10.875	9.0621	10.571	8.6768
-62.4	7.0847	8.4926	0	10.116	4.9542	6.6489	10.875	9.0621	10.571	8.6768
-62.3	7.0847	8.4926	0	10.116	4.9542	6.6489	10.875	9.0621	10.571	8.6768
-62.2	7.0847	8.4926	0	10.116	4.9542	6.6489	10.875	9.0621	10.571	8.6768
-62.1	7.0847	8.4926	0	10.116	4.9542	6.6489	10.875	9.0621	10.571	8.6768
-62	7.0847	8.4926	0	10.116	4.9542	6.6489	10.875	9.0621	10.571	8.6768
-61.9	7.0847	8.4926	0	10.116	4.9542	6.6489	10.875	9.0621	10.571	8.6768
-61.8	7.0847	8.4926	0	10.116	4.9542	6.6489	10.875	9.0621	10.571	8.6768
-61.7	7.0847	8.4926	0	10.116	4.9542	6.6489	10.875	9.0621	10.571	8.6768
-61.6	7.0847	8.4926	0	10.116	4.9542	6.6489	10.875	9.0621	10.571	8.6768
-61.5	7.0847	8.4926	0	10.116	4.9542	6.6489	10.875	9.0621	10.571	8.6768
-61.4	7.0847	8.4926	0	10.116	4.9542	6.6489	10.875	9.0621	10.571	8.6768
-61.3	7.0847	8.4926	0	10.116	4.9542	6.6489	10.875	9.0621	10.571	8.6768
-61.2	7.0847	8.4926	0	10.116	4.9542	6.6489	10.875	9.0621	10.571	8.6768
-61.1	7.0847	8.4926	0	10.116	4.9542	6.6489	10.875	9.0621	10.571	8.6768
-61	7.0847	8.4926	0	10.116	4.9542	6.6489	10.875	9.0621	10.571	8.6768
-60.9	7.0847	8.4926	0	10.116	4.9542	6.6489	10.875	9.0621	10.571	8.6768
-60.8	7.0847	8.4926	0	10.116	4.9542	6.6489	10.875	9.0621	10.571	8.6768
-60.7	7.0847	8.4926	0	10.116	4.9542	6.6489	10.875	9.0621	10.571	8.6768
-60.6	7.0847	8.4926	0	10.116	4.9542	6.6489	10.875	9.0621	10.571	8.6768
-60.5	7.0847	8.4926	0	10.116	4.9542	6.6489	10.875	9.0621	10.571	8.6768
-60.4	7.0847	8.4926	0	10.116	4.9542	6.6489	10.875	9.0621	10.571	8.6768
-60.3	7.0847	8.4926	0	10.116	4.9542	6.6489	10.875	9.0621	10.571	8.6768
-60.2	7.0847	8.4926	0	10.116	4.9542	6.6489	10.875	9.0621	10.571	8.6768
-60.1	7.0847	8.4926	0	10.116	4.9542	6.6489	10.875	9.0621	10.571	8.6768
-60	7.0847	8.4926	0	10.116	4.9542	6.6489	10.875	9.0621	10.571	8.6768
-59.9	7.0847	8.4926	0	10.116	4.9542	6.6489	10.875	9.0621	10.571	8.6768
-59.8	7.0847	8.4926	0	10.116	4.9542	6.6489	10.875	9.0621	10.571	8.6768
-59.7	7.0847	8.4926	0	10.116	4.9542	6.6489	10.875	9.0621	10.571	8.6768
-59.6	7.0847	8.4926	0	10.116	4.9542	6.6489	10.875	9.0621	10.571	8.6768
-59.5	7.0847	8.4926	0	10.116	4.9542	6.6489	10.875	9.0621	10.571	8.6768
-59.4	7.0847	8.4926	0	10.116	4.9542	6.6489	10.875	9.0621	10.571	8.6768
-59.3	7.0847	8.4926	0	10.116	4.9542	6.6489	10.875	9.0621	10.571	8.6768
-59.2	7.0847	8.4926	0	10.116	4.9542	6.6489	10.875	9.0621	10.571	8.6768
-59.1	7.0847	8.4926	0	10.116	4.9542	6.6489	10.875	9.0621	10.571	8.6768
-59	7.0847	8.4926	0	10.116	4.9542	6.6489	10.875	9.0621	10.571	8.6768
-58.9	7.0847	8.4926	0	10.116	4.9542	6.6489	10.875	9.0621	10.571	8.6768
-58.8	7.0847	8.4926	0	10.116	4.9542	6.6489	10.875	9.0621	10.571	8.6768
-58.7	7.0847	8.4926	0	10.116	4.9542	6.6489	10.875	9.0621	10.571	8.6768
-58.6	7.0847	8.4926	0	10.116	4.9542	6.6489	10.875	9.0621	10.571	8.6768
-58.5	7.0847	8.4926	0	10.116	4.9542	6.6489	10.875	9.0621	10.571	8.6768
-58.4	7.0847	8.4926	0	10.116	4.9542	6.6489	10.875	9.0621	10.571	8.6768
-58.3	7.0847	8.4926	0	10.116	4.9542	6.6489	10.875	9.0621	10.571	8.6768
-58.2	7.0847	8.4926	0	10.116	4.9542	6.6489	10.875	9.0621	10.571	8.6768
-58.1	7.0847	8.4926	0	10.116	4.9542	6.6489	10.875	9.0621	10.571	8.6768
-58	7.0847	8.4926	0	10.116	4.9542	6.6489	10.875	9.0621	10.571	8.6768
-57.9	7.0847	8.4926	0	10.116	4.9542	6.6489	10.875	9.0621	10.571	8.6768
-57.8	7.0847	8.4926	0	10.116	4.9542	6.6489	10.875	9.0621	10.571	8.6768
-57.7	7.0847	8.4926	0	10.116	4.9542	6.6489	10.875	9.0621	10.571	8.6768
-57.6	7.0847	8.4926	0	10.116	4.9542	6.6489	10.875	9.0621	10.571	8.6768
-57.5	7.0847	8.4926	0	10.116	4.9542	6.6489	10.875	9.0621	10.571	8.6768
-57.4	7.0847	8.4926	0	10.116	4.9542	6.6489	10.875	9.0621	10.571	8.6768
-57.3	7.0847	8.4926	0	10.116	4.9542	6.6489	10.875	9.0621	10.571	8.6768
-57.2	7.0847	8.4926	0	10.116	4.9542	6.6489	10.875	9.0621	10.571	8.6768
-57.1	7.0847	8.4926	0	10.116	4.9542	6.6489	10.875	9.0621	10.571	8.6768
-57	7.0847	8.4926	0	10.116	4.9542	6.6489	10.875	9.0621	10.571	8.6768
-56.9	7.0847	8.4926	0	10.116	4.9542	6.6489	10.875	9.0621	10.571	8.6768
-56.8	7.0847	8.4926	0	10.116	4.9542	6.6489	10.875	9.0621	10.571	8.6768
-56.7	7.0847	8.4926	0	10.116	4.9542	6.6489	10.875	9.0621	10.571	8.6768
-56.6	7.0847	8.4926	0	10.116	4.9542	6.6489	10.875	9.0621	10.571	8.6768
-56.5	7.0847	8.4926	0	10.116	4.9542	6.6489	10.875	9.0621	10.571	8.6768
-56.4	7.0847	8.4926	0	10.116	4.9542	6.6489	10.875	9.0621	10.571	8.6768
-56.3	7.0847	8.4926	0	10.116	4.9542	6.6489	10.875	9.0621	10.571	8.6768
-56.2	7.0847	8.4926	0	10.116	4.9542	6.6489	10.875	9.0621	10.571	8.6768
-56.1	7.0847	8.4926	0	10.116	4.9542	6.6489	10.875	9.0621	10.571	8.6768
-56	7.0847	8.4926	0	10.116	4.9542	6.6489	10.875	9.0621	10.571	8.6768
-55.9	7.0847	8.4926	0	10.116	4.9542	6.6489	10.875	9.0621	10.571	8.6768
-55.8	7.0847	8.4926	0	10.116	4.9542	6.6489	10.875	9.0621	10.571	8.6768
-55.7	7.0847	8.4926	0	10.116	4.9542	6.6489	10.875	9.0621	10.571	8.6768
-55.6	7.0847	8.4926	0	10.116	4.9542	6.6489	10.875	9.0621	10.571	8.6768
-55.5	7.0847	8.4926	0	10.116	4.9542	6.6489	10.875	9.0621	10.571	8.6768
-55.4	7.0847	8.4926	0	10.116	4.9542	6.6489	10.875	9.0621	10.571	8.6768
-55.3	7.0847	8.4926	0	10.116	4.9542	6.6489	10.875	9.0621	10.571	8.6768
-55.2	7.0847	8.4926	0	10.116	4.9542	6.6489	10.875	9.0621	10.571	8.6768
-55.1	7.0847	8.4926	0	10.116	4.9542	6.6489	10.875	9.0621	10.571	8.6768
-55	7.0847	8.4926	0	10.116	4.9542	6.6489	10.875	9.0621	10.571	8.6768
-54.9	7.0847	8.4926	0	10.116	4.9542	6.6489	10.875	9.0621	10.571	8.6768
-54.8	7.0847	8.4926	0	10.116	4.9542	6.6489	10.875	9.0621	10.571	8.6768
-54.7	7.0847	8.4926	0	10.116	4.9542	6.6489	10.875	9.0621	10.571	8.6768
-54.6	7.0847	8.4926	0	10.116	4.9542	6.6489	10.875	9.0621	10.571	8.6768
-54.5	7.0847	8.4926	0	10.116	4.9542	6.6489	10.875	9.0621	10.571	8.6768
-54.4	7.0847	8.4926	0	10.116	4.9542	6.6489	10.875	9.0621	10.571	8.6768
-54.3	7.0847	8.4926	0	10.116	4.9542	6.6489	10.875	9.0621	10.571	8.6768
-54.2	7.0847	8.4926	0	10.116	4.9542	6.6489	10.875	9.0621	10.571	8.6768
-54.1	7.0847	8.4926	0	10.116	4.9542	6.6489	10.875	9.0621	10.571	8.6768
-54	7.0847	8.4926	0	10.116	4.9542	6.6489	10.875	9.0621	10.571	8.6768
-53.9	7.0847	8.4926	0	10.116	4.9542	6.6489	10.875	9.0621	10.571	8.6768
-53.8	7.0847	8.4926	0	10.116	4.9542	6.6489	10.875	9.0621	10.571	8.6768
-53.7	7.0847	8.4926	0	10.116	4.9542	6.6489	10.875	9.0621	10.571	8.6768
-53.6	7.0847	8.4926	0	10.116	4.9542	6.6489	10.875	9.0621	10.571	8.6768
-53.5	7.0847	8.4926	0	10.116	4.9542	6.6489	10.875	9.0621	10.571	8.6768
-53.4	7.0847	8.4926	0	10.116	4.9542	6.6489	10.875	9.0621	10.571	8.6768
-53.3	7.0847	8.4926	0	10.116	4.9542	6.6489	10.875	9.0621	10.571	8.6768
-53.2	7.0847	8.4926	0	10.116	4.9542	6.6489	10.875	9.0621	10.571	8.6768
-53.1	7.0847	8.4926	0	10.116	4.9542	6.6489	10.875	9.0621	10.571	8.6768
-53	7.0847	8.4926	0	10.116	4.9542	6.6489	10.875	9.0621	10.571	8.6768
-52.9	7.0847	8.4926	0	10.116	4.9542	6.6489	10.875	9.0621	10.571	8.6768
-52.8	7.0847	8.4926	0	10.116	4.9542	6.6489	10.875	9.0621	10.571	8.6768
-52.7	7.0847	8.4926	0	10.116	4.9542	6.6489	10.875	9.0621	10.571	8.6768
-52.6	7.0847	8.4926	0	10.116	4.9542	6.6489	10.875	9.0621	10.571	8.6768
-52.5	7.0847	8.4926	0	10.116	4.9542	6.6489	10.875	9.0621	10.571	8.6768
-52.4	7.0847	8.4926	0	10.116	4.9542	6.6489	10.875	9.0621	10.571	8.6768
-52.3	7.0847	8.4926	0	10.116	4.9542	6.6489	10.875	9.0621	10.571	8.6768
-52.2	7.0847	8.4926	0	10.116	4.9542	6.6489	10.875	9.0621	10.571	8.6768
-52.1	7.0847	8.4926	0	10.116	4.9542	6.6489	10.875	9.0621	10.571	8.6768
-52	7.0847	8.4926	0	10.116	4.9542	6.6489	10.875	9.0621	10.571	8.6768
-51.9	7.0847	8.4926	0	10.116	4.9542	6.6489	10.875	9.0621	10.571	8.6768
-51.8	7.0847	8.4926	0	10.116	4.9542	6.6489	10.875	9.0621	10.571	8.6768
-51.7	7.0847	8.4926	0	10.116	4.9542	6.6489	10.875	9.0621	10.571	8.6768
-51.6	7.0847	8.4926	0	10.116	4.9542	6.6489	10.875	9.0621	10.571	8.6768
-51.5	7.0847	8.4926	0	10.116	4.9542	6.6489	10.875	9.0621	10.571	8.6768
-51.4	7.0847	8.4926	0	10.116	4.9542	6.6489	10.875	9.0621	10.571	8.6768
-51.3	7.0847	8.4926	0	10.116	4.9542	6.6489	10.875	9.0621	10.571	8.6768
-51.2	7.0847	8.4926	0	10.116	4.9542	6.6489	10.875	9.0621	10.571	8.6768
-51.1	7.0847	8.4926	0	10.116	4.9542	6.6489	10.875	9.0621	10.571	8.6768
-51	7.0847	8.4926	0	10.116	4.9542	6.6489	10.875	9.0621	10.571	8.6768
-50.9	7.0847	8.4926	0	10.116	4.9542	6.6489	10.875	9.0621	10.571	8.6768
-50.8	7.0847	8.4926	0	10.116	4.9542	6.6489	10.875	9.0621	10.571	8.6768
-50.7	7.0847	8.4926	0	10.116	4.9542	6.6489	10.875	9.0621	10.571	8.6768
-50.6	7.0847	8.4926	0	10.116	4.9542	6.6489	10.875	9.0621	10.571	8.6768
-50.5	7.0847	8.4926	0	10.116	4.9542	6.6489	10.875	9.0621	10.571	8.6768
-50.4	7.0847	8.4926	0	10.116	4.9542	6.6489	10.875	9.0621	10.571	8.6768
-50.3	7.0847	8.4926	0	10.116	4.9542	6.6489	10.875	9.0621	10.571	8.6768
-50.2	7.0847	8.4926	0	10.116	4.9542	6.6489	10.875	9.0621	10.571	8.6768
-50.1	7.0847	8.4926	0	10.116	4.9542	6.6489	10.875	9.0621	10.571	8.6768
-50	7.0847	8.4926	0	10.116	4.9542	6.6489	10.875	9.0621	10.571	8.6768
-49.9	7.0847	8.4926	0	10.116	4.9542	6.6489	10.875	9.0621	10.571	8.6768
-49.8	7.0847	8.4926	0	10.116	4.9542	6.6489	10.875	9.0621	10.571	8.6768
-49.7	7.0847	8.4926	0	10.116	4.9542	6.6489	10.875	9.0621	10.571	8.6768
-49.6	7.0847	8.4926	0	10.116	4.9542	6.6489	10.875	9.0621	10.571	8.6768
-49.5	7.0847	8.4926	0	10.116	4.9542	6.6489	10.875	9.0621	10.571	8.6768
-49.4	7.0847	8.4926	0	10.116	4.9542	6.6489	10.875	9.0621	10.571	8.6768
-49.3	7.0847	8.4926	0	10.116	4.9542	6.6489	10.875	9.0621	10.571	8.6768
-49.2	7.0847	8.4926	0	10.116	4.9542	6.6489	10.875	9.0621	10.571	8.6768
-49.1	7.0847	8.4926	0	10.116	4.9542	6.6489	10.875	9.0621	10.571	8.6768
-49	7.0847	8.4926	0	10.116	4.9542	6.6489	10.875	9.0621	10.571	8.6768
-48.9	7.0847	8.4926	0	10.116	4.9542	6.6489	10.875	9.0621	10.571	8.6768
-48.8	7.0847	8.4926	0	10.116	4.9542	6.6489	10.875	9.0621	10.571	8.6768
-48.7	7.0847	8.4926	0	10.116	4.9542	6.6489	10.875	9.0621	10.571	8.6768
-48.6	7.0847	8.4926	0	10.116	4.9542	14.641	10.875	9.0621	10.571	8.6768
-48.5	7.0847	8.4926	0	10.116	4.9542	14.641	10.875	9.0621	10.571	8.6768
-48.4	7.0847	8.4926	0	10.116	4.9542	14.641	10.875	9.0621	10.571	8.6768
-48.3	7.0847	8.4926	0	10.116	4.9542	14.641	10.875	9.0621	10.571	8.6768
-48.2	7.0847	8.4926	0	10.116	4.9542	14.641	10.875	9.0621	10.571	8.6768
-48.1	7.0847	8.4926	0	10.116	4.9542	14.641	10.875	9.0621	10.571	8.6768
-48	7.0847	8.4926	0	10.116	4.9542	14.641	10.875	9.0621	10.571	8.6768
-47.9	7.0847	8.4926	0	10.116	4.9542	14.641	10.875	9.0621	10.571	8.6768
-47.8	7.0847	8.4926	0	10.116	4.9542	14.641	10.875	9.0621	10.571	8.6768
-47.7	7.0847	8.4926	0	10.116	4.9542	14.641	10.875	9.0621	10.571	8.6768
-47.6	7.0847	8.4926	0	10.116	4.9542	14.641	10.875	9.0621	10.571	8.6768
-47.5	7.0847	8.4926	0	10.116	4.9542	14.641	10.875	9.0621	10.571	8.6768
-47.4	7.0847	8.4926	0	10.116	4.9542	14.641	10.875	9.0621	10.571	8.6768
-47.3	7.0847	8.4926	0	10.116	4.9542	14.641	10.875	9.0621	10.571	8.6768
-47.2	7.0847	8.4926	0	10.116	4.9542	14.641	10.875	9.0621	10.571	8.6768
-47.1	7.0847	8.4926	0	10.116	4.9542	14.641	10.875	9.0621	10.571	8.6768
-47	7.0847	8.4926	0	10.116	4.9542	14.641	10.875	9.0621	10.571	8.6768
-46.9	7.0847	8.4926	0	10.116	4.9542	14.641	10.875	9.0621	10.571	8.6768
-46.8	7.0847	8.4926	0	10.116	4.9542	14.641	10.875	9.0621	10.571	8.6768
-46.7	7.0847	8.4926	0	10.116	4.9542	14.641	10.875	9.0621	10.571	8.6768
-46.6	7.0847	8.4926	0	10.116	4.9542	14.641	10.875	9.0621	10.571	8.6768
-46.5	7.0847	8.4926	0	10.116	4.9542	14.641	10.875	9.0621	10.571	8.6768
-46.4	7.0847	8.4926	0	10.116	4.9542	14.641	10.875	9.0621	10.571	8.6768
-46.3	7.0847	8.4926	0	10.116	4.9542	14.641	10.875	9.0621	10.571	8.6768
-46.2	7.0847	8.4926	0	10.116	4.9542	14.641	10.875	9.0621	10.571	8.6768
-46.1	7.0847	8.4926	0	10.116	4.9542	14.641	10.875	9.0621	10.571	8.6768
-46	7.0847	8.4926	0	10.116	4.9542	14.641	10.875	9.0621	10.571	8.6768
-45.9	7.0847	8.4926	0	10.116	4.9542	14.641	10.875	9.0621	10.571	8.6768
-45.8	7.0847	8.4926	0	10.116	4.9542	14.641	10.875	9.0621	10.571	8.6768
-45.7	7.0847	8.4926	0	10.116	4.9542	14.641	10.875	9.0621	10.571	8.6768
-45.6	7.0847	8.4926	0	10.116	4.9542	14.641	10.875	9.0621	10.571	8.6768
-45.5	7.0847	8.4926	0	10.116	4.9542	14.641	10.875	9.0621	10.571	8.6768
-45.4	7.0847	8.4926	0	10.116	4.9542	14.641	10.875	9.0621	10.571	8.6768
-45.3	7.0847	8.4926	0	10.116	4.9542	14.641	10.875	9.0621	10.571	8.6768
-45.2	7.0847	8.4926	0	10.116	4.9542	14.641	10.875	9.0621	10.571	8.6768
-45.1	7.0847	8.4926	0	10.116	4.9542	14.641	10.875	9.0621	10.571	8.6768
-45	7.0847	8.4926	0	10.116	4.9542	14.641	10.875	9.0621	10.571	8.6768
-44.9	7.0847	8.4926	0	10.116	4.9542	14.641	10.875	9.0621	10.571	8.6768
-44.8	7.0847	8.4926	0	10.116	4.9542	14.641	10.875	9.0621	10.571	8.6768
-44.7	7.0847	8.4926	0	10.116	4.9542	14.641	10.875	9.0621	10.571	8.6768
-44.6	7.0847	8.4926	0	10.116	4.9542	14.641	10.875	9.0621	10.571	8.6768
-44.5	7.0847	8.4926	0	10.116	4.9542	14.641	10.875	9.0621	10.571	8.6768
-44.4	7.0847	8.4926	0	10.116	4.9542	14.641	10.875	9.0621	10.571	8.6768
-44.3	7.0847	8.4926	0	10.116	4.9542	14.641	10.875	9.0621	10.571	8.6768
-44.2	7.0847	8.4926	0	10.116	4.9542	14.641	10.875	9.0621	10.571	8.6768
-44.1	7.0847	8.4926	0	10.116	4.9542	14.641	10.875	9.0621	10.571	8.6768
-44	7.0847	8.4926	0	10.116	4.9542	14.641	10.875	9.0621	10.571	8.6768
-43.9	7.0847	8.4926	0	10.116	4.9542	14.641	10.875	9.0621	10.571	8.6768
-43.8	7.0847	8.4926	0	10.116	4.9542	14.641	10.875	9.0621	10.571	8.6768
-43.7	7.0847	8.4926	0	10.116	4.9542	14.641	10.875	9.0621	10.571	8.6768
-43.6	7.0847	8.4926	0	10.116	4.9542	14.641	10.875	9.0621	10.571	8.6768
-43.5	7.0847	8.4926	0	10.116	4.9542	14.641	10.875	9.0621	10.571	8.6768
-43.4	7.0847	8.4926	0	10.116	4.9542	14.641	10.875	9.0621	10.571	8.6768
-43.3	7.0847	8.4926	0	10.116	4.9542	14.641	10.875	9.0621	10.571	8.6768
-43.2	7.0847	8.4926	0	10.116	4.9542	14.641	10.875	9.0621	10.571	8.6768
-43.1	7.0847	8.4926	0	10.116	4.9542	14.641	10.875	9.0621	10.571	8.6768
-43	7.0847	8.4926	0	10.116	4.9542	14.641	10.875	9.0621	10.571	8.6768
-42.9	7.0847	8.4926	0	10.116	4.9542	14.641	10.875	9.0621	10.571	8.6768
-42.8	7.0847	8.4926	0	10.116	4.9542	14.641	10.875	9.0621	10.571	8.6768
-42.7	7.0847	8.4926	0	10.116	4.9542	14.641	10.875	9.0621	10.571	8.6768
-42.6	7.0847	8.4926	0	10.116	4.9542	14.641	10.875	9.0621	10.571	8.6768
-42.5	7.0847	8.4926	0	10.116	4.9542	14.641	10.875	9.0621	10.571	8.6768
-42.4	7.0847	8.4926	0	10.116	4.9542	14.641	10.875	9.0621	10.571	8.6768
-42.3	7.0847	8.4926	0	10.116	4.9542	14.641	10.875	9.0621	10.571	8.6768
-42.2	7.0847	8.4926	0	10.116	4.9542	14.641	10.875	9.0621	10.571	8.6768
-42.1	7.0847	8.4926	0	10.116	4.9542	14.641	10.875	9.0621	10.571	8.6768
-42	7.0847	8.4926	0	10.116	4.9542	14.641	10.875	9.0621	10.571	8.6768
-41.9	7.0847	8.4926	0	10.116	4.9542	14.641	10.875	9.0621	10.571	8.6768
-41.8	7.0847	8.4926	0	10.116	4.9542	14.641	10.875	9.0621	10.571	8.6768
-41.7	7.0847	8.4926	0	10.116	4.9542	14.641	10.875	9.0621	10.571	8.6768
-41.6	7.0847	8.4926	0	10.116	4.9542	14.641	10.875	9.0621	10.571	8.6768
-41.5	7.0847	8.4926	0	10.116	4.9542	14.641	10.875	9.0621	10.571	8.6768
-41.4	7.0847	8.4926	0	10.116	4.9542	14.641	10.875	9.0621	10.571	8.6768
-41.3	7.0847	8.4926	0	10.116	4.9542	14.641	10.875	9.0621	10.571	8.6768
-41.2	7.0847	8.4926	0	10.116	4.9542	14.641	10.875	9.0621	10.571	8.6768
-41.1	7.0847	8.4926	0	10.116	4.9542	14.641	10.875	9.0621	10.571	8.6768
-41	7.0847	8.4926	0	10.116	4.9542	14.641	10.875	9.0621	10.571	8.6768
-40.9	7.0847	8.4926	0	10.116	4.9542	14.641	10.875	9.0621	10.571	8.6768
-40.8	7.0847	8.4926	0	10.116	4.9542	14.641	10.875	9.0621	10.571	8.6768
-40.7	7.0847	8.4926	0	10.116	4.9542	14.641	10.875	9.0621	10.571	8.6768
-40.6	7.0847	8.4926	0	10.116	4.9542	14.641	10.875	9.0621	10.571	16.667
-40.5	7.0847	8.4926	0	10.116	4.9542	14.641	10.875	9.0621	10.571	16.667
-40.4	7.0847	8.4926	0	10.116	4.9542	14.641	10.875	9.0621	10.571	16.667
-40.3	7.0847	8.4926	0	10.116	4.9542	14.641	10.875	9.0621	10.571	16.667
-40.2	7.0847	8.4926	0	10.116	4.9542	14.641	10.875	9.0621	10.571	16.667
-40.1	7.0847	8.4926	0	10.116	4.9542	14.641	10.875	9.0621	10.571	16.667
-40	7.0847	8.4926	0	10.116	4.9542	14.641	10.875	9.0621	10.571	16.667
-39.9	7.0847	8.4926	0	10.116	4.9542	14.641	10.875	9.0621	10.571	16.667
-39.8	7.0847	8.4926	0	10.116	4.9542	14.641	10.875	9.0621	10.571	16.667
-39.7	7.0847	8.4926	0	10.116	4.9542	14.641	10.875	9.0621	10.571	16.667
-39.6	7.0847	8.4926	0	10.116	4.9542	14.641	10.875	9.0621	10.571	16.667
-39.5	7.0847	8.4926	0	10.116	4.9542	14.641	10.875	9.0621	10.571	16.667
-39.4	7.0847	8.4926	0	10.116	4.9542	14.641	10.875	9.0621	10.571	16.667
-39.3	7.0847	8.4926	0	10.116	4.9542	14.641	10.875	9.0621	10.571	16.667
-39.2	7.0847	8.4926	0	10.116	4.9542	14.641	10.875	9.0621	10.571	16.667
-39.1	7.0847	8.4926	0	10.116	4.9542	14.641	10.875	9.0621	10.571	16.667
-39	7.0847	8.4926	0	10.116	4.9542	14.641	10.875	9.0621	10.571	16.667
-38.9	7.0847	8.4926	0	10.116	4.9542	14.641	10.875	9.0621	10.571	16.667
-38.8	7.0847	8.4926	0	10.116	4.9542	14.641	10.875	9.0621	10.571	16.667
-38.7	7.0847	8.4926	0	10.116	4.9542	14.641	10.875	9.0621	10.571	16.667
-38.6	7.0847	8.4926	0	10.116	4.9542	14.641	10.875	9.0621	10.571	16.667
-38.5	7.0847	8.4926	0	10.116	4.9542	14.641	10.875	9.0621	10.571	16.667
-38.4	7.0847	8.4926	0	10.116	4.9542	14.641	10.875	9.0621	10.571	16.667
-38.3	7.0847	8.4926	0	10.116	4.9542	14.641	10.875	9.0621	10.571	16.667
-38.2	7.0847	8.4926	0	10.116	4.9542	14.641	10.875	9.0621	10.571	16.667
-38.1	7.0847	8.4926	0	10.116	4.9542	14.641	10.875	9.0621	10.571	16.667
-38	7.0847	8.4926	0	10.116	4.9542	14.641	10.875	9.0621	10.571	16.667
-37.9	7.0847	8.4926	0	10.116	4.9542	14.641	10.875	9.0621	10.571	16.667
-37.8	7.0847	8.4926	0	10.116	4.9542	14.641	10.875	9.0621	10.571	16.667
-37.7	7.0847	8.4926	0	10.116	4.9542	14.641	10.875	9.0621	10.571	16.667
-37.6	7.0847	8.4926	0	10.116	4.9542	14.641	10.875	9.0621	10.571	16.667
-37.5	7.0847	8.4926	0	10.116	4.9542	14.641	10.875	9.0621	10.571	16.667
-37.4	7.0847	8.4926	0	10.116	4.9542	14.641	10.875	9.0621	10.571	16.667
-37.3	7.0847	8.4926	0	10.116	4.9542	14.641	10.875	9.0621	10.571	16.667
-37.2	7.0847	8.4926	0	10.116	4.9542	14.641	10.875	9.0621	10.571	16.667
-37.1	7.0847	8.4926	0	10.116	4.9542	14.641	10.875	9.0621	10.571	16.667
-37	7.0847	8.4926	0	10.116	4.9542	14.641	10.875	9.0621	10.571	16.667
-36.9	7.0847	8.4926	0	10.116	4.9542	14.641	10.875	9.0621	10.571	16.667
-36.8	7.0847	8.4926	0	10.116	4.9542	14.641	10.875	9.0621	10.571	16.667
-36.7	7.0847	8.4926	0	10.116	4.9542	14.641	10.875	9.0621	10.571	16.667
-36.6	7.0847	8.4926	0	10.116	4.9542	14.641	10.875	9.0621	10.571	16.667
-36.5	7.0847	8.4926	0	10.116	4.9542	14.641	10.875	9.0621	10.571	16.667
-36.4	7.0847	8.4926	0	10.116	4.9542	14.641	10.875	9.0621	10.571	16.667
-36.3	7.0847	8.4926	0	10.116	4.9542	14.641	10.875	9.0621	10.571	16.667
-36.2	7.0847	8.4926	0	10.116	4.9542	14.641	10.875	9.0621	10.571	16.667
-36.1	7.0847	8.4926	0	10.116	4.9542	14.641	10.875	9.0621	10.571	16.667
-36	7.0847	8.4926	0	10.116	4.9542	14.641	10.875	9.0621	10.571	16.667
-35.9	7.0847	8.4926	0	10.116	4.9542	14.641	10.875	9.0621	10.571	16.667
-35.8	7.0847	8.4926	0	10.116	4.9542	14.641	10.875	9.0621	10.571	16.667
-35.7	7.0847	8.4926	0	10.116	4.9542	14.641	10.875	9.0621	10.571	16.667
-35.6	7.0847	8.4926	0	10.116	4.9542	14.641	10.875	9.0621	10.571	16.667
-35.5	7.0847	8.4926	0	10.116	4.9542	14.641	10.875	9.0621	10.571	16.667
-35.4	7.0847	8.4926	0	10.116	4.9542	14.641	10.875	9.0621	10.571	16.667
-35.3	7.0847	8.4926	0	10.116	4.9542	14.641	10.875	9.0621	10.571	16.667
-35.2	7.0847	8.4926	0	10.116	4.9542	14.641	10.875	9.0621	10.571	16.667
-35.1	7.0847	8.4926	0	10.116	4.9542	14.641	10.875	9.0621	10.571	16.667
-35	7.0847	8.4926	0	10.116	4.9542	14.641	10.875	9.0621	10.571	16.667
-34.9	7.0847	8.4926	0	10.116	4.9542	14.641	10.875	9.0621	10.571	16.667
-34.8	7.0847	8.4926	0	10.116	4.9542	14.641	10.875	9.0621	10.571	16.667
-34.7	7.0847	8.4926	0	10.116	4.9542	14.641	10.875	9.0621	10.571	16.667
-34.6	7.0847	8.4926	0	10.116	4.9542	14.641	10.875	9.0621	10.571	16.667
-34.5	7.0847	8.4926	0	10.116	4.9542	14.641	10.875	9.0621	10.571	16.667
-34.4	7.0847	8.4926	0	10.116	4.9542	14.641	10.875	9.0621	10.571	16.667
-34.3	7.0847	8.4926	0	10.116	4.9542	14.641	10.875	9.0621	10.571	16.667
-34.2	7.0847	8.4926	0	10.116	4.9542	14.641	10.875	9.0621	10.571	16.667
-34.1	7.0847	8.4926	0	10.116	4.9542	14.641	10.875	9.0621	10.571	16.667
-34	7.0847	8.4926	0	10.116	4.9542	14.641	10.875	9.0621	10.571	16.667
-33.9	7.0847	8.4926	0	10.116	4.9542	14.641	10.875	9.0621	10.571	16.667
-33.8	7.0847	8.4926	0	10.116	4.9542	14.641	10.875	9.0621	10.571	16.667
-33.7	7.0847	8.4926	0	10.116	4.9542	14.641	10.875	9.0621	10.571	16.667
-33.6	7.0847	8.4926	0	10.116	4.9542	14.641	10.875	9.0621	10.571	16.667
-33.5	7.0847	8.4926	0	10.116	4.9542	14.641	10.875	9.0621	10.571	16.667
-33.4	7.0847	8.4926	0	10.116	4.9542	14.641	10.875	9.0621	10.571	16.667
-33.3	7.0847	8.4926	0	10.116	4.9542	14.641	10.875	9.0621	10.571	16.667
-33.2	7.0847	8.4926	0	10.116	4.9542	14.641	10.875	9.0621	10.571	16.667
-33.1	7.0847	8.4926	0	10.116	4.9542	14.641	10.875	9.0621	10.571	16.667
-33	7.0847	8.4926	0	10.116	4.9542	14.641	10.875	9.0621	10.571	16.667
-32.9	7.0847	8.4926	0	10.116	4.9542	14.641	10.875	9.0621	10.571	16.667
-32.8	7.0847	8.4926	0	10.116	4.9542	14.641	10.875	9.0621	10.571	16.667
-32.7	7.0847	8.4926	0	10.116	4.9542	14.641	10.875	9.0621	10.571	16.667
-32.6	7.0847	8.4926	0	10.116	4.9542	14.641	10.875	9.0621	10.571	16.667
-32.5	7.0847	8.4926	0	10.116	4.9542	14.641	10.875	9.0621	10.571	16.667
-32.4	7.0847	8.4926	0	10.116	4.9542	14.641	10.875	9.0621	10.571	16.667
-32.3	7.0847	8.4926	0	10.116	4.9542	14.641	10.875	9.0621	10.571	16.667
-32.2	7.0847	8.4926	0	10.116	4.9542	14.641	10.875	9.0621	10.571	16.667
-32.1	7.0847	8.4926	0	10.116	4.9542	14.641	10.875	9.0621	10.571	16.667
-32	7.0847	8.4926	0	10.116	4.9542	14.641	10.875	9.0621	10.571	16.667
-31.9	7.0847	8.4926	0	10.116	4.9542	14.641	10.875	9.0621	10.571	16.667
-31.8	7.0847	8.4926	0	10.116	4.9542	14.641	10.875	9.0621	10.571	16.667
-31.7	7.0847	8.4926	0	10.116	4.9542	14.641	10.875	9.0621	10.571	16.667
-31.6	7.0847	8.4926	0	10.116	4.9542	14.641	10.875	9.0621	10.571	16.667
-31.5	7.0847	8.4926	0	10.116	4.9542	14.641	10.875	9.0621	10.571	16.667
-31.4	7.0847	8.4926	0	10.116	4.9542	14.641	10.875	9.0621	10.571	16.667
-31.3	7.0847	8.4926	0	10.116	4.9542	14.641	10.875	9.0621	10.571	16.667
-31.2	7.0847	8.4926	0	10.116	4.9542	14.641	10.875	9.0621	10.571	16.667
-31.1	7.0847	8.4926	0	10.116	4.9542	14.641	10.875	9.0621	10.571	16.667
-31	7.0847	8.4926	0	10.116	4.9542	14.641	10.875	9.0621	10.571	16.667
-30.9	7.0847	8.4926	0	10.116	4.9542	14.641	10.875	9.0621	10.571	16.667
-30.8	7.0847	8.4926	0	10.116	4.9542	14.641	10.875	9.0621	10.571	16.667
-30.7	7.0847	8.4926	0	10.116	4.9542	14.641	10.875	9.0621	10.571	16.667
-30.6	7.0847	8.4926	0	10.116	4.9542	14.641	10.875	9.0621	10.571	16.667
-30.5	7.0847	8.4926	0	10.116	4.9542	14.641	10.875	9.0621	10.571	16.667
-30.4	7.0847	8.4926	0	10.116	4.9542	14.641	10.875	9.0621	10.571	16.667
-30.3	7.0847	8.4926	0	10.116	4.9542	14.641	10.875	9.0621	10.571	16.667
-30.2	7.0847	8.4926	0	10.116	4.9542	14.641	10.875	9.0621	10.571	16.667
-30.1	7.0847	8.4926	0	10.116	4.9542	14.641	10.875	9.0621	10.571	16.667
-30	7.0847	8.4926	0	10.116	4.9542	14.641	10.875	9.0621	10.571	16.667
-29.9	7.0847	8.4926	0	10.116	4.9542	14.641	10.875	9.0621	10.571	16.667
-29.8	7.0847	8.4926	0	10.116	4.9542	14.641	10.875	9.0621	10.571	16.667
-29.7	7.0847	8.4926	0	10.116	4.9542	14.641	10.875	9.0621	10.571	16.667
-29.6	7.0847	8.4926	0	10.116	4.9542	14.641	10.875	9.0621	10.571	16.667
-29.5	7.0847	8.4926	0	10.116	4.9542	14.641	10.875	9.0621	10.571	16.667
-29.4	7.0847	8.4926	0	10.116	4.9542	14.641	10.875	9.0621	10.571	16.667
-29.3	7.0847	8.4926	0	10.116	4.9542	14.641	10.875	9.0621	10.571	16.667
-29.2	7.0847	8.4926	0	10.116	4.9542	14.641	10.875	9.0621	10.571	16.667
-29.1	7.0847	8.4926	0	10.116	4.9542	14.641	10.875	9.0621	10.571	16.667
-29	7.0847	8.4926	0	10.116	4.9542	14.641	10.875	9.0621	10.571	16.667
-28.9	7.0847	8.4926	0	10.116	4.9542	14.641	10.875	9.0621	10.571	16.667
-28.8	7.0847	8.4926	0	10.116	4.9542	14.641	10.875	9.0621	10.571	16.667
-28.7	7.0847	8.4926	0	10.116	4.9542	14.641	10.875	9.0621	10.571	16.667
-28.6	7.0847	8.4926	0	10.116	4.9542	14.641	10.875	9.0621	10.571	16.667
-28.5	7.0847	8.4926	0	10.116	4.9542	14.641	10.875	9.0621	10.571	16.667
-28.4	7.0847	8.4926	0	10.116	4.9542	14.641	10.875	9.0621	10.571	16.667
-28.3	7.0847	8.4926	0	10.116	4.9542	14.641	10.875	9.0621	10.571	16.667
-28.2	7.0847	8.4926	0	10.116	4.9542	14.641	10.875	9.0621	10.571	16.667
-28.1	7.0847	8.4926	0	10.116	4.9542	14.641	10.875	9.0621	10.571	16.667
-28	7.0847	8.4926	0	10.116	4.9542	14.641	10.875	9.0621	10.571	16.667
-27.9	7.0847	8.4926	0	10.116	4.9542	14.641	10.875	9.0621	10.571	16.667
-27.8	7.0847	8.4926	0	10.116	4.9542	14.641	10.875	9.0621	10.571	16.667
-27.7	7.0847	8.4926	0	10.116	4.9542	14.641	10.875	9.0621	10.571	16.667
-27.6	7.0847	8.4926	0	10.116	4.9542	14.641	10.875	9.0621	10.571	16.667
-27.5	7.0847	8.4926	0	10.116	4.9542	14.641	10.875	9.0621	10.571	16.667
-27.4	7.0847	8.4926	0	10.116	4.9542	14.641	10.875	9.0621	10.571	16.667
-27.3	7.0847	8.4926	0	10.116	4.9542	14.641	10.875	9.0621	10.571	16.667
-27.2	7.0847	8.4926	0	10.116	4.9542	14.641	10.875	9.0621	10.571	16.667
-27.1	7.0847	8.4926	0	10.116	4.9542	14.641	10.875	9.0621	10.571	16.667
-27	7.0847	8.4926	0	10.116	4.9542	14.641	10.875	9.0621	10.571	16.667
-26.9	7.0847	8.4926	0	10.116	4.9542	14.641	10.875	9.0621	10.571	16.667
-26.8	7.0847	8.4926	0	10.116	4.9542	14.641	10.875	9.0621	10.571	16.667
-26.7	7.0847	8.4926	0	10.116	4.9542	14.641	10.875	9.0621	10.571	16.667
-26.6	7.0847	8.4926	0	10.116	4.9542	14.641	10.875	9.0621	10.571	16.667
-26.5	7.0847	8.4926	0	10.116	4.9542	14.641	10.875	9.0621	10.571	16.667
-26.4	7.0847	8.4926	0	10.116	4.9542	14.641	10.875	9.0621	10.571	16.667
-26.3	7.0847	8.4926	0	10.116	4.9542	14.641	10.875	9.0621	10.571	16.667
-26.2	7.0847	8.4926	0	10.116	4.9542	14.641	10.875	9.0621	10.571	16.667
-26.1	7.0847	8.4926	0	10.116	4.9542	14.641	10.875	9.0621	10.571	16.667
-26	7.0847	8.4926	0	10.116	4.9542	14.641	10.875	9.0621	10.571	16.667
-25.9	7.0847	8.4926	0	10.116	4.9542	14.641	10.875	9.0621	10.571	16.667
-25.8	7.0847	8.4926	0	10.116	4.9542	14.641	10.875	9.0621	10.571	16.667
-25.7	7.0847	8.4926	0	10.116	4.9542	14.641	10.875	9.0621	10.571	16.667
-25.6	7.0847	8.4926	0	10.116	4.9542	14.641	10.875	9.0621	10.571	16.667
-25.5	7.0847	8.4926	0	10.116	4.9542	14.641	10.875	9.0621	10.571	16.667
-25.4	7.0847	8.4926	0	10.116	4.9542	14.641	10.875	9.0621	10.571	16.667
-25.3	7.0847	8.4926	0	10.116	4.9542	14.641	10.875	9.0621	10.571	16.667
-25.2	7.0847	8.4926	0	10.116	4.9542	14.641	10.875	9.0621	10.571	16.667
-25.1	7.0847	8.4926	0	10.116	4.9542	14.641	10.875	9.0621	10.571	16.667
-25	7.0847	8.4926	0	10.116	4.9542	14.641	10.875	9.0621	10.571	16.667
-24.9	7.0847	8.4926	0	10.116	4.9542	14.641	10.875	9.0621	10.571	16.667
-24.8	7.0847	8.4926	0	10.116	4.9542	14.641	10.875	9.0621	10.571	16.667
-24.7	7.0847	8.4926	0	10.116	4.9542	14.641	10.875	9.0621	10.571	16.667
-24.6	7.0847	8.4926	0	10.116	4.9542	14.641	10.875	9.0621	10.571	16.667
-24.5	7.0847	8.4926	0	10.116	4.9542	14.641	10.875	9.0621	10.571	16.667
-24.4	7.0847	8.4926	0	10.116	4.9542	14.641	10.875	9.0621	10.571	16.667
-24.3	7.0847	8.4926	0	10.116	4.9542	14.641	10.875	9.0621	10.571	16.667
-24.2	7.0847	8.4926	0	10.116	4.9542	14.641	10.875	9.0621	10.571	16.667
-24.1	7.0847	8.4926	0	10.116	4.9542	14.641	10.875	9.0621	10.571	16.667
-24	7.0847	8.4926	0	10.116	4.9542	14.641	10.875	9.0621	10.571	16.667
-23.9	7.0847	8.4926	0	10.116	4.9542	14.641	10.875	9.0621	10.571	16.667
-23.8	7.0847	8.4926	0	10.116	4.9542	14.641	10.875	9.0621	10.571	16.667
-23.7	7.0847	8.4926	0	10.116	4.9542	14.641	10.875	9.0621	10.571	16.667
-23.6	7.0847	8.4926	0	10.116	4.9542	14.641	10.875	9.0621	10.571	16.667
-23.5	7.0847	8.4926	0	10.116	4.9542	14.641	10.875	9.0621	10.571	16.667
-23.4	7.0847	8.4926	0	10.116	4.9542	14.641	10.875	9.0621	10.571	16.667
-23.3	7.0847	8.4926	0	10.116	4.9542	14.641	10.875	9.0621	10.571	16.667
-23.2	7.0847	8.4926	0	10.116	4.9542	14.641	10.875	9.0621	10.571	16.667
-23.1	7.0847	8.4926	0	10.116	4.9542	14.641	10.875	9.0621	10.571	16.667
-23	7.0847	8.4926	0	10.116	4.9542	14.641	10.875	9.0621	10.571	16.667
-22.9	7.0847	8.4926	0	10.116	4.9542	14.641	10.875	9.0621	10.571	16.667
-22.8	7.0847	8.4926	0	10.116	4.9542	14.641	10.875	9.0621	10.571	16.667
-22.7	7.0847	8.4926	0	10.116	4.9542	14.641	10.875	9.0621	10.571	16.667
-22.6	7.0847	8.4926	0	10.116	4.9542	14.641	10.875	9.0621	10.571	16.667
-22.5	7.0847	8.4926	0	10.116	4.9542	14.641	10.875	9.0621	10.571	16.667
-22.4	7.0847	8.4926	0	10.116	4.9542	14.641	10.875	9.0621	10.571	16.667
-22.3	7.0847	8.4926	0	10.116	4.9542	14.641	10.875	9.0621	10.571	16.667
-22.2	7.0847	8.4926	0	10.116	4.9542	14.641	10.875	9.0621	10.571	16.667
-22.1	7.0847	8.4926	0	10.116	4.9542	14.641	10.875	9.0621	10.571	16.667
-22	7.0847	8.4926	0	10.116	4.9542	14.641	10.875	9.0621	10.571	16.667
-21.9	7.0847	8.4926	0	10.116	4.9542	14.641	10.875	9.0621	10.571	16.667
-21.8	7.0847	8.4926	0	10.116	4.9542	14.641	10.875	9.0621	10.571	16.667
-21.7	7.0847	8.4926	0	10.116	4.9542	14.641	10.875	9.0621	10.571	16.667
-21.6	7.0847	8.4926	0	10.116	4.9542	14.641	10.875	9.0621	10.571	16.667
-21.5	7.0847	8.4926	0	10.116	4.9542	14.641	10.875	9.0621	10.571	16.667
-21.4	7.0847	8.4926	0	10.116	4.9542	14.641	10.875	9.0621	10.571	16.667
-21.3	7.0847	8.4926	0	10.116	4.9542	14.641	10.875	9.0621	10.571	16.667
-21.2	7.0847	8.4926	0	10.116	4.9542	14.641	10.875	9.0621	10.571	16.667
-21.1	7.0847	8.4926	0	10.116	4.9542	14.641	10.875	9.0621	10.571	16.667
-21	7.0847	8.4926	0	10.116	4.9542	14.641	10.875	9.0621	10.571	16.667
-20.9	7.0847	8.4926	0	10.116	4.9542	14.641	10.875	9.0621	10.571	16.667
-20.8	7.0847	8.4926	0	10.116	4.9542	14.641	10.875	9.0621	10.571	16.667
-20.7	7.0847	8.4926	0	10.116	4.9542	14.641	10.875	9.0621	10.571	16.667
-20.6	7.0847	8.4926	0	10.116	4.9542	14.641	10.875	9.0621	10.571	16.667
-20.5	7.0847	8.4926	0	10.116	4.9542	14.641	10.875	9.0621	10.571	16.667
-20.4	7.0847	8.4926	0	10.116	4.9542	14.641	10.875	9.0621	10.571	16.667
-20.3	7.0847	8.4926	0	10.116	4.9542	14.641	10.875	9.0621	10.571	16.667
-20.2	7.0847	8.4926	0	10.116	4.9542	14.641	10.875	9.0621	10.571	16.667
-20.1	7.0847	8.4926	0	10.116	4.9542	14.641	10.875	9.0621	10.571	16.667
-20	7.0847	8.4926	0	10.116	4.9542	14.641	10.875	9.0621	10.571	16.667
-19.9	7.0847	8.4926	0	10.116	4.9542	14.641	10.875	9.0621	10.571	16.667
-19.8	7.0847	8.4926	0	10.116	4.9542	14.641	10.875	9.0621	10.571	16.667
-19.7	7.0847	8.4926	0	10.116	4.9542	14.641	10.875	9.0621	10.571	16.667
-19.6	7.0847	8.4926	0	10.116	4.9542	14.641	10.875	9.0621	10.571	16.667
-19.5	7.0847	8.4926	0	10.116	4.9542	14.641	10.875	9.0621	10.571	16.667
-19.4	7.0847	8.4926	0	10.116	4.9542	14.641	10.875	9.0621	10.571	16.667
-19.3	7.0847	8.4926	0	10.116	4.9542	14.641	10.875	9.0621	10.571	16.667
-19.2	7.0847	8.4926	0	10.116	4.9542	14.641	10.875	9.0621	10.571	16.667
-19.1	7.0847	8.4926	0	10.116	4.9542	14.641	10.875	9.0621	10.571	16.667
-19	7.0847	8.4926	0	10.116	4.9542	14.641	10.875	9.0621	10.571	16.667
-18.9	7.0847	8.4926	0	10.116	4.9542	14.641	10.875	9.0621	10.571	16.667
-18.8	7.0847	8.4926	0	10.116	4.9542	14.641	10.875	9.0621	10.571	16.667
-18.7	7.0847	8.4926	0	10.116	4.9542	14.641	10.875	9.0621	10.571	16.667
-18.6	7.0847	8.4926	0	10.116	4.9542	14.641	10.875	9.0621	10.571	16.667
-18.5	7.0847	8.4926	0	10.116	4.9542	14.641	10.875	9.0621	10.571	16.667
-18.4	7.0847	8.4926	0	10.116	4.9542	14.641	10.875	9.0621	10.571	16.667
-18.3	7.0847	8.4926	0	10.116	4.9542	14.641	10.875	9.0621	10.571	16.667
-18.2	7.0847	8.4926	0	10.116	4.9542	14.641	10.875	9.0621	10.571	16.667
-18.1	7.0847	8.4926	0	10.116	4.9542	14.641	10.875	9.0621	10.571	16.667
-18	7.0847	8.4926	0	10.116	4.9542	14.641	10.875	9.0621	10.571	16.667
-17.9	7.0847	8.4926	0	10.116	4.9542	14.641	10.875	9.0621	10.571	16.667
-17.8	7.0847	8.4926	0	10.116	4.9542	14.641	10.875	9.0621	10.571	16.667
-17.7	7.0847	8.4926	0	10.116	4.9542	14.641	10.875	9.0621	10.571	16.667
-17.6	7.0847	8.4926	0	10.116	4.9542	14.641	10.875	9.0621	10.571	16.667
-17.5	7.0847	8.4926	0	10.116	4.9542	14.641	10.875	9.0621	10.571	16.667
-17.4	7.0847	8.4926	0	10.116	4.9542	14.641	10.875	9.0621	10.571	16.667
-17.3	7.0847	8.4926	0	10.116	4.9542	14.641	10.875	9.0621	10.571	16.667
-17.2	7.0847	8.4926	0	10.116	4.9542	14.641	10.875	9.0621	10.571	16.667
-17.1	7.0847	8.4926	0	10.116	4.9542	14.641	10.875	9.0621	10.571	16.667
-17	7.0847	8.4926	0	10.116	4.9542	14.641	10.875	9.0621	10.571	16.667
-16.9	7.0847	8.4926	0	10.116	4.9542	14.641	10.875	9.0621	10.571	16.667
-16.8	7.0847	8.4926	0	10.116	4.9542	14.641	10.875	9.0621	10.571	16.667
-16.7	7.0847	8.4926	0	10.116	4.9542	14.641	10.875	9.0621	10.571	16.667
-16.6	7.0847	8.4926	0	10.116	4.9542	14.641	10.875	9.0621	10.571	16.667
-16.5	7.0847	8.4926	0	10.116	4.9542	14.641	10.875	9.0621	10.571	16.667
-16.4	7.0847	8.4926	0	10.116	4.9542	14.641	10.875	9.0621	10.571	16.667
-16.3	7.0847	8.4926	0	10.116	4.9542	14.641	10.875	9.0621	10.571	16.667
-16.2	7.0847	8.4926	0	10.116	4.9542	14.641	10.875	9.0621	10.571	16.667
-16.1	7.0847	8.4926	0	10.116	4.9542	14.641	10.875	9.0621	10.571	16.667
-16	7.0847	8.4926	0	10.116	4.9542	14.641	10.875	9.0621	10.571	16.667
-15.9	7.0847	8.4926	0	10.116	4.9542	14.641	10.875	9.0621	10.571	16.667
-15.8	7.0847	8.4926	0	10.116	4.9542	14.641	10.875	9.0621	10.571	16.667
-15.7	7.0847	8.4926	0	10.116	4.9542	14.641	10.875	9.0621	10.571	16.667
-15.6	7.0847	8.4926	0	10.116	4.9542	14.641	10.875	9.0621	10.571	16.667
-15.5	7.0847	8.4926	0	10.116	4.9542	14.641	10.875	9.0621	10.571	16.667
-15.4	7.0847	8.4926	0	10.116	4.9542	14.641	10.875	9.0621	10.571	16.667
-15.3	7.0847	8.4926	0	10.116	4.9542	14.641	10.875	9.0621	10.571	16.667
-15.2	7.0847	8.4926	0	10.116	4.9542	14.641	10.875	9.0621	10.571	16.667
-15.1	7.0847	8.4926	0	10.116	4.9542	14.641	10.875	9.0621	10.571	16.667
-15	7.0847	8.4926	0	10.116	4.9542	14.641	10.875	9.0621	10.571	16.667
-14.9	7.0847	8.4926	0	10.116	4.9542	14.641	10.875	9.0621	10.571	16.667
-14.8	7.0847	8.4926	0	10.116	4.9542	14.641	10.875	9.0621	10.571	16.667
-14.7	7.0847	8.4926	0	10.116	4.9542	14.641	10.875	9.0621	10.571	16.667
-14.6	7.0847	8.4926	0	10.116	4.9542	14.641	10.875	9.0621	10.571	16.667
-14.5	7.0847	8.4926	0	10.116	4.9542	14.641	10.875	9.0621	10.571	16.667
-14.4	7.0847	8.4926	0	10.116	4.9542	14.641	10.875	9.0621	10.571	16.667
-14.3	7.0847	8.4926	0	10.116	4.9542	14.641	10.875	9.0621	10.571	16.667
-14.2	7.0847	8.4926	0	10.116	4.9542	14.641	10.875	9.0621	10.571	16.667
-14.1	7.0847	8.4926	0	10.116	4.9542	14.641	10.875	9.0621	10.571	16.667
-14	7.0847	8.4926	0	10.116	4.9542	14.641	10.875	9.0621	10.571	16.667
-13.9	7.0847	8.4926	0	10.116	4.9542	14.641	10.875	9.0621	10.571	16.667
-13.8	7.0847	8.4926	0	10.116	4.9542	14.641	10.875	9.0621	10.571	16.667
-13.7	7.0847	8.4926	0	10.116	4.9542	14.641	10.875	9.0621	10.571	16.667
-13.6	7.0847	8.4926	0	10.116	4.9542	14.641	10.875	9.0621	10.571	16.667
-13.5	7.0847	8.4926	0	10.116	4.9542	14.641	10.875	9.0621	10.571	16.667
-13.4	7.0847	8.4926	0	10.116	4.9542	14.641	10.875	9.0621	10.571	16.667
-13.3	7.0847	8.4926	0	10.116	4.9542	14.641	10.875	9.0621	10.571	16.667
-13.2	7.0847	8.4926	0	10.116	4.9542	14.641	10.875	9.0621	10.571	16.667
-13.1	7.0847	8.4926	0	10.116	4.9542	14.641	10.875	9.0621	10.571	16.667
-13	7.0847	8.4926	0	10.116	4.9542	14.641	10.875	9.0621	10.571	16.667
-12.9	7.0847	8.4926	0	10.116	4.9542	14.641	10.875	9.0621	10.571	16.667
-12.8	7.0847	8.4926	0	10.116	4.9542	14.641	10.875	9.0621	10.571	16.667
-12.7	7.0847	8.4926	0	10.116	4.9542	14.641	10.875	9.0621	10.571	16.667
-12.6	7.0847	8.4926	0	10.116	4.9542	14.641	10.875	9.0621	10.571	16.667
-12.5	7.0847	8.4926	0	10.116	4.9542	14.641	10.875	9.0621	10.571	16.667
-12.4	7.0847	8.4926	0	10.116	4.9542	14.641	10.875	9.0621	10.571	16.667
-12.3	7.0847	8.4926	0	10.116	4.9542	14.641	10.875	9.0621	10.571	16.667
-12.2	7.0847	8.4926	0	10.116	4.9542	14.641	10.875	9.0621	10.571	16.667
-12.1	7.0847	8.4926	0	10.116	4.9542	14.641	10.875	9.0621	10.571	16.667
-12	7.0847	8.4926	0	10.116	4.9542	14.641	10.875	9.0621	10.571	16.667
-11.9	7.0847	8.4926	0	10.116	4.9542	14.641	10.875	9.0621	10.571	16.667
-11.8	7.0847	8.4926	0	10.116	4.9542	14.641	10.875	9.0621	10.571	16.667
-11.7	7.0847	8.4926	0	10.116	4.9542	14.641	10.875	9.0621	10.571	16.667
-11.6	7.0847	8.4926	0	10.116	4.9542	14.641	10.875	9.0621	10.571	16.667
-11.5	7.0847	8.4926	0	10.116	4.9542	14.641	10.875	9.0621	10.571	16.667
-11.4	7.0847	8.4926	0	10.116	4.9542	14.641	10.875	9.0621	10.571	16.667
-11.3	7.0847	8.4926	0	10.116	4.9542	14.641	10.875	9.0621	10.571	16.667
-11.2	7.0847	8.4926	0	10.116	4.9542	14.641	10.875	9.0621	10.571	16.667
-11.1	7.0847	8.4926	0	10.116	4.9542	14.641	10.875	9.0621	10.571	16.667
-11	7.0847	8.4926	0	10.116	4.9542	14.641	10.875	9.0621	10.571	16.667
-10.9	7.0847	8.4926	0	10.116	4.9542	14.641	10.875	9.0621	10.571	16.667
-10.8	7.0847	8.4926	0	10.116	4.9542	14.641	10.875	9.0621	10.571	16.667
-10.7	7.0847	8.4926	0	10.116	4.9542	14.641	10.875	9.0621	10.571	16.667
-10.6	7.0847	8.4926	0	10.116	4.9542	14.641	10.875	9.0621	10.571	16.667
-10.5	7.0847	8.4926	0	10.116	4.9542	14.641	10.875	9.0621	10.571	16.667
-10.4	7.0847	8.4926	0	10.116	4.9542	14.641	10.875	9.0621	10.571	16.667
-10.3	7.0847	8.4926	0	10.116	4.9542	14.641	10.875	9.0621	10.571	16.667
-10.2	7.0847	8.4926	0	10.116	4.9542	14.641	10.875	9.0621	10.571	16.667
-10.1	7.0847	8.4926	0	10.116	4.9542	14.641	10.875	9.0621	10.571	16.667
-10	7.0847	8.4926	0	10.116	4.9542	14.641	10.875	9.0621	10.571	16.667
-9.9	7.0847	8.4926	0	10.116	4.9542	14.641	10.875	9.0621	10.571	16.667
-9.8	7.0847	8.4926	0	10.116	4.9542	14.641	10.875	9.0621	10.571	16.667
-9.7	7.0847	8.4926	0	10.116	4.9542	14.641	10.875	9.0621	10.571	16.667
-9.6	7.0847	8.4926	0	10.116	4.9542	14.641	10.875	9.0621	10.571	16.667
-9.5	7.0847	8.4926	0	10.116	4.9542	14.641	10.875	9.0621	10.571	16.667
-9.4	7.0847	8.4926	0	10.116	4.9542	14.641	10.875	9.0621	10.571	16.667
-9.3	7.0847	8.4926	0	10.116	4.9542	14.641	10.875	9.0621	10.571	16.667
-9.2	7.0847	8.4926	0	10.116	4.9542	14.641	10.875	9.0621	10.571	16.667
-9.1	7.0847	8.4926	0	10.116	4.9542	14.641	10.875	9.0621	10.571	16.667
-9	7.0847	8.4926	0	10.116	4.9542	14.641	10.875	9.0621	10.571	16.667
-8.9	7.0847	8.4926	0	10.116	4.9542	14.641	10.875	9.0621	10.571	16.667
-8.8	7.0847	8.4926	0	10.116	4.9542	14.641	10.875	9.0621	10.571	16.667
-8.7	7.0847	8.4926	0	10.116	4.9542	14.641	10.875	9.0621	10.571	16.667
-8.6	7.0847	8.4926	0	10.116	4.9542	14.641	10.875	9.0621	10.571	16.667
-8.5	7.0847	8.4926	0	10.116	4.9542	14.641	10.875	9.0621	10.571	16.667
-8.4	7.0847	8.4926	0	10.116	4.9542	14.641	10.875	9.0621	10.571	16.667
-8.3	7.0847	8.4926	0	10.116	4.9542	14.641	10.875	9.0621	10.571	16.667
-8.2	7.0847	8.4926	0	10.116	4.9542	14.641	10.875	9.0621	10.571	16.667
-8.1	7.0847	8.4926	0	10.116	4.9542	14.641	10.875	9.0621	10.571	16.667
-8	7.0847	8.4926	0	10.116	4.9542	14.641	10.875	9.0621	10.571	16.667
-7.9	7.0847	8.4926	0	10.116	4.9542	14.641	10.875	9.0621	10.571	16.667
-7.8	7.0847	8.4926	0	10.116	4.9542	14.641	10.875	9.0621	10.571	16.667
-7.7	7.0847	8.4926	0	10.116	4.9542	14.641	10.875	9.0621	10.571	16.667
-7.6	7.0847	8.4926	0	10.116	4.9542	14.641	10.875	9.0621	10.571	16.667
-7.5	7.0847	8.4926	0	10.116	4.9542	14.641	10.875	9.0621	10.571	16.667
-7.4	7.0847	8.4926	0	10.116	4.9542	14.641	10.875	9.0621	10.571	16.667
-7.3	7.0847	8.4926	0	10.116	4.9542	14.641	10.875	9.0621	10.571	16.667
-7.2	7.0847	8.4926	0	10.116	4.9542	14.641	10.875	9.0621	10.571	16.667
-7.1	7.0847	8.4926	0	10.116	4.9542	14.641	10.875	9.0621	10.571	16.667
-7	7.0847	8.4926	0	10.116	4.9542	14.641	10.875	9.0621	10.571	16.667
-6.9	7.0847	8.4926	0	10.116	4.9542	14.641	10.875	9.0621	10.571	16.667
-6.8	7.0847	8.4926	0	10.116	4.9542	14.641	10.875	9.0621	10.571	16.667
-6.7	7.0847	8.4926	0	10.116	4.9542	14.641	10.875	9.0621	10.571	16.667
-6.6	7.0847	8.4926	0	10.116	4.9542	14.641	10.875	9.0621	10.571	16.667
-6.5	7.0847	8.4926	0	10.116	4.9542	14.641	10.875	9.0621	10.571	16.667
-6.4	7.0847	8.4926	0	10.116	4.9542	14.641	10.875	9.0621	10.571	16.667
-6.3	7.0847	8.4926	0	10.116	4.9542	14.641	10.875	9.0621	10.571	16.667
-6.2	7.0847	8.4926	0	10.116	4.9542	14.641	10.875	9.0621	10.571	16.667
-6.1	7.0847	8.4926	0	10.116	4.9542	14.641	10.875	9.0621	10.571	16.667
-6	7.0847	8.4926	0	10.116	4.9542	14.641	10.875	9.0621	10.571	16.667
-5.9	7.0847	8.4926	0	10.116	4.9542	14.641	10.875	9.0621	10.571	16.667
-5.8	7.0847	8.4926	0	10.116	4.9542	14.641	10.875	9.0621	10.571	16.667
-5.7	7.0847	8.4926	0	10.116	4.9542	14.641	10.875	9.0621	10.571	16.667
-5.6	7.0847	8.4926	0	10.116	4.9542	14.641	10.875	9.0621	10.571	16.667
-5.5	7.0847	8.4926	0	10.116	4.9542	14.641	10.875	9.0621	10.571	16.667
-5.4	7.0847	8.4926	0	10.116	4.9542	14.641	10.875	9.0621	10.571	16.667
-5.3	7.0847	8.4926	0	10.116	4.9542	14.641	10.875	9.0621	10.571	16.667
-5.2	7.0847	8.4926	0	10.116	4.9542	14.641	10.875	9.0621	10.571	16.667
-5.1	7.0847	8.4926	0	10.116	4.9542	14.641	10.875	9.0621	10.571	16.667
-5	7.0847	8.4926	0	10.116	4.9542	14.641	10.875	9.0621	10.571	16.667
-4.9	7.0847	8.4926	0	10.116	4.9542	14.641	10.875	9.0621	10.571	16.667
-4.8	7.0847	8.4926	0	10.116	4.9542	14.641	10.875	9.0621	10.571	16.667
-4.7	7.0847	8.4926	0	10.116	4.9542	14.641	10.875	9.0621	10.571	16.667
-4.6	7.0847	8.4926	0	10.116	4.9542	14.641	10.875	9.0621	10.571	16.667
-4.5	7.0847	8.4926	0	10.116	4.9542	14.641	10.875	9.0621	10.571	16.667
-4.4	7.0847	8.4926	0	10.116	4.9542	14.641	10.875	9.0621	10.571	16.667
-4.3	7.0847	8.4926	0	10.116	4.9542	14.641	10.875	9.0621	10.571	16.667
-4.2	7.0847	8.4926	0	10.116	4.9542	14.641	10.875	9.0621	10.571	16.667
-4.1	7.0847	8.4926	0	10.116	4.9542	14.641	10.875	9.0621	10.571	16.667
-4	7.0847	8.4926	0	10.116	4.9542	14.641	10.875	9.0621	10.571	16.667
-3.9	7.0847	8.4926	0	10.116	4.9542	14.641	10.875	9.0621	10.571	16.667
-3.8	7.0847	8.4926	0	10.116	4.9542	14.641	10.875	9.0621	10.571	16.667
-3.7	7.0847	8.4926	0	10.116	4.9542	14.641	10.875	9.0621	10.571	16.667
-3.6	7.0847	8.4926	0	10.116	4.9542	14.641	10.875	9.0621	10.571	16.667
-3.5	7.0847	8.4926	0	10.116	4.9542	14.641	10.875	9.0621	10.571	16.667
-3.4	7.0847	8.4926	0	10.116	4.9542	14.641	10.875	9.0621	10.571	16.667
-3.3	7.0847	8.4926	0	10.116	4.9542	14.641	10.875	9.0621	10.571	16.667
-3.2	7.0847	8.4926	0	10.116	4.9542	14.641	10.875	9.0621	10.571	16.667
-3.1	7.0847	8.4926	0	10.116	4.9542	14.641	10.875	9.0621	10.571	16.667
-3	7.0847	8.4926	0	10.116	4.9542	14.641	10.875	9.0621	10.571	16.667
-2.9	7.0847	8.4926	0	10.116	4.9542	14.641	10.875	9.0621	10.571	16.667
-2.8	7.0847	8.4926	0	10.116	4.9542	14.641	10.875	9.0621	10.571	16.667
-2.7	7.0847	8.4926	0	10.116	4.9542	14.641	10.875	9.0621	10.571	16.667
-2.6	7.0847	8.4926	0	10.116	4.9542	14.641	10.875	9.0621	10.571	16.667
-2.5	7.0847	8.4926	0	10.116	4.9542	14.641	10.875	9.0621	10.571	16.667
-2.4	7.0847	8.4926	45.455	10.116	4.9542	14.641	10.875	9.0621	10.571	16.667
-2.3	7.0847	8.4926	45.455	10.116	4.9542	14.641	10.875	9.0621	10.571	16.667
-2.2	7.0847	8.4926	45.455	10.116	4.9542	14.641	10.875	9.0621	10.571	16.667
-2.1	7.0847	8.4926	45.455	10.116	4.9542	14.641	10.875	9.0621	10.571	16.667
-2	7.0847	8.4926	45.455	10.116	4.9542	14.641	10.875	9.0621	10.571	16.667
-1.9	7.0847	8.4926	45.455	10.116	4.9542	14.641	10.875	9.0621	10.571	16.667
-1.8	7.0847	8.4926	45.455	10.116	4.9542	14.641	10.875	9.0621	10.571	16.667
-1.7	7.0847	8.4926	45.455	10.116	4.9542	14.641	10.875	9.0621	10.571	16.667
-1.6	7.0847	8.4926	45.455	10.116	4.9542	14.641	10.875	9.0621	10.571	16.667
-1.5	7.0847	8.4926	45.455	10.116	4.9542	14.641	10.875	9.0621	10.571	16.667
-1.4	7.0847	8.4926	45.455	10.116	4.9542	14.641	10.875	9.0621	10.571	16.667
-1.3	7.0847	8.4926	45.455	10.116	4.9542	14.641	10.875	9.0621	10.571	16.667
-1.2	7.0847	8.4926	45.455	10.116	4.9542	14.641	10.875	9.0621	10.571	16.667
-1.1	7.0847	8.4926	45.455	10.116	4.9542	14.641	10.875	9.0621	10.571	16.667
-1	7.0847	8.4926	45.455	10.116	4.9542	14.641	10.875	9.0621	10.571	16.667
-0.9	7.0847	8.4926	45.455	10.116	4.9542	14.641	10.875	9.0621	10.571	16.667
-0.8	7.0847	8.4926	45.455	10.116	4.9542	14.641	10.875	9.0621	10.571	16.667
-0.7	7.0847	8.4926	45.455	10.116	4.9542	14.641	10.875	9.0621	10.571	16.667
-0.6	7.0847	8.4926	45.455	10.116	4.9542	14.641	10.875	9.0621	10.571	16.667
-0.5	7.0847	8.4926	45.455	10.116	4.9542	14.641	10.875	9.0621	10.571	16.667
-0.4	7.0847	8.4926	45.455	10.116	4.9542	14.641	10.875	9.0621	10.571	16.667
-0.3	7.0847	8.4926	45.455	10.116	4.9542	14.641	10.875	9.0621	10.571	16.667
[truncated: 7,003 more rows]
